# Supplementary material
Source: publisher site journal article supplement (https://www.spandidos-publications.com/7280/downloadSupplementary)
Supplement: Supplementary file 1 [file downloadSupplementary]

## Sheet: Supplementary Table1
Table SI. Identified proteins
Accession no.	Protein	Gene name	Molecular weight, kDa	Coverage, %	MS/MS count	Peptides	Unique peptides	Razor + unique peptides	MS/MS count Vector_1	MS/MS count Vector_2	MS/MS count Vector_3	MS/MS count SLC4A7_1	MS/MS count SLC4A7_2	MS/MS count SLC4A7_3	Peptides Vector_1	Peptides Vector_2	Peptides Vector_3	Peptides SLC4A7_1	Peptides SLC4A7_2	Peptides SLC4A7_3	Unique peptides Vector_1	Unique peptides Vector_2	Unique peptides Vector_3	Unique peptides SLC4A7_1	Unique peptides SLC4A7_2	Unique peptides SLC4A7_3	Razor + unique peptides Vector_1	Razor + unique peptides Vector_2	Razor + unique peptides Vector_3	Razor + unique peptides SLC4A7_1	Razor + unique peptides SLC4A7_2	Razor + unique peptides SLC4A7_3	iBAQ Vector_1	iBAQ Vector_2	iBAQ Vector_3	iBAQ SLC4A7_1	iBAQ SLC4A7_2	iBAQ SLC4A7_3	LFQ intensity Vector_1	LFQ intensity Vector_2	LFQ intensity Vector_3	LFQ intensity SLC4A7_1	LFQ intensity SLC4A7_2	LFQ intensity SLC4A7_3	Relative intensity Vector_1	Relative intensity Vector_2	Relative intensity Vector_3	Relative intensity SLC4A7_1	Relative intensity SLC4A7_2
P0DPI2	Glutamine amidotransferase-like class 1 domain-containing protein 3, mitochondrial OS=Homo sapiens OX=9606 GN=GATD3 PE=1 SV=1	GATD3	28.17	58.6	47	9	9	9	6	7	9	9	8	8	8	9	9	9	9	9	8	9	9	9	9	9	8	9	9	9	9	9	114460	121200	100440	131260	126060	102900	391640	404390	351730	453800	401640	369860	0.990215	1.02245	0.889307	1.14738	1.0155
P0DPI3	Centromere protein V-like protein 2 OS=Homo sapiens OX=9606 GN=CENPVL2 PE=3 SV=1	CENPVL2	29.887	2.9	6	1	1	1	1	1	1	1	1	1	1	1	1	1	1	1	1	1	1	1	1	1	1	1	1	1	1	1	5342.9	2981.9	3478.7	4022.6	3427.8	4930	0	0	0	0	0	0
A0A0U1RRL7	Protein MMP24OS OS=Homo sapiens OX=9606 GN=MMP24OS PE=1 SV=1	MMP24OS	7.6794	74.6	13	2	2	2	2	2	2	2	2	3	2	2	2	2	2	2	2	2	2	2	2	2	2	2	2	2	2	2	204560	128000	158720	167310	106360	139480	443450	269700	356940	371050	231390	275640	1.36574	0.830626	1.09931	1.14277	0.712638
A0AV96	RNA-binding protein 47 OS=Homo sapiens OX=9606 GN=RBM47 PE=1 SV=2	RBM47	64.098	30.7	56	14	14	14	11	9	10	10	7	9	13	13	13	14	13	12	13	13	13	14	13	12	13	13	13	14	13	12	64397	57747	59253	61155	50835	45616	301530	262720	289210	307760	231040	234660	1.11203	0.968898	1.06659	1.135	0.852064
A0AVF1	Intraflagellar transport protein 56 OS=Homo sapiens OX=9606 GN=TTC26 PE=2 SV=1	TTC26	64.177	3.6	4	1	1	1	1	0	1	0	1	1	1	1	1	1	1	1	1	1	1	1	1	1	1	1	1	1	1	1	339.17	386.56	299.43	335.36	275.13	404.62	0	0	0	0	0	0
A0AVI4	E3 ubiquitin-protein ligase TM129 OS=Homo sapiens OX=9606 GN=TMEM129 PE=1 SV=1	TMEM129	40.463	5	1	1	1	1	0	0	0	1	0	0	0	0	0	1	0	0	0	0	0	1	0	0	0	0	0	1	0	0				143.13			0	0	0	0	0	0
A0AVT1	Ubiquitin-like modifier-activating enzyme 6 OS=Homo sapiens OX=9606 GN=UBA6 PE=1 SV=1	UBA6	117.97	56.4	285	44	44	44	45	48	48	46	49	49	44	44	44	42	43	43	44	44	44	42	43	43	44	44	44	42	43	43	181780	186590	178510	149120	192250	193260	833990	788450	835770	719430	831660	927470	1.01361	0.958258	1.01577	0.874373	1.01077
A0FGR8	Extended synaptotagmin-2 OS=Homo sapiens OX=9606 GN=ESYT2 PE=1 SV=1	ESYT2	102.36	35.2	119	21	21	21	22	19	21	19	19	19	21	19	19	21	20	20	21	19	19	21	20	20	21	19	19	21	20	20	74294	70688	62203	80374	68723	65717	452540	405300	405780	517240	415200	420310	1.03779	0.929456	0.930556	1.18616	0.952159
A0JNW5	UHRF1-binding protein 1-like OS=Homo sapiens OX=9606 GN=UHRF1BP1L PE=1 SV=2	UHRF1BP1L	164.2	3.7	6	3	3	3	0	2	1	1	2	0	0	2	1	2	2	1	0	2	1	2	2	1	0	2	1	2	2	1		239.16	104.96	109.63	252.78	87.424	0	0	0	5922.4	12379	0				0.647207	1.35279
A0MZ66	Shootin-1 OS=Homo sapiens OX=9606 GN=SHTN1 PE=1 SV=4	SHTN1	71.639	34.4	77	16	16	16	15	11	12	13	12	14	15	15	15	14	13	15	15	15	15	14	13	15	15	15	15	14	13	15	25855	27561	26018	31543	24647	25858	156170	153520	149270	190720	160550	161740	0.964042	0.947684	0.921448	1.17732	0.99108
A0PJW6	Transmembrane protein 223 OS=Homo sapiens OX=9606 GN=TMEM223 PE=1 SV=1	TMEM223	22.049	5	3	1	1	1	0	1	1	0	0	1	0	1	1	0	0	1	0	1	1	0	0	1	0	1	1	0	0	1		616.17	431.72			789.69	0	0	0	0	0	0
A0PK00	Transmembrane protein 120B OS=Homo sapiens OX=9606 GN=TMEM120B PE=1 SV=1	TMEM120B	40.245	5	2	1	1	1	1	0	0	0	1	0	1	1	1	1	1	1	1	1	1	1	1	1	1	1	1	1	1	1	1685.9	1136.5	1042.3	1795.6	1606.5	945.17	0	0	0	0	0	0
A1A4S6	Rho GTPase-activating protein 10 OS=Homo sapiens OX=9606 GN=ARHGAP10 PE=1 SV=1	ARHGAP10	89.374	1.9	2	1	1	1	0	1	0	0	0	1	1	1	0	0	0	1	1	1	0	0	0	1	1	1	0	0	0	1	109.25	137.79				142.23	0	0	0	0	0	0
A1L0T0	2-hydroxyacyl-CoA lyase 2 OS=Homo sapiens OX=9606 GN=ILVBL PE=1 SV=2	ILVBL	67.867	30.4	72	11	11	11	13	8	13	12	13	13	10	11	10	11	11	11	10	11	10	11	11	11	10	11	10	11	11	11	47044	50071	42323	50070	48333	49421	309280	279540	274650	326020	303250	335150	1.0152	0.917583	0.901531	1.07015	0.99541
A1L390	Pleckstrin homology domain-containing family G member 3 OS=Homo sapiens OX=9606 GN=PLEKHG3 PE=1 SV=1	PLEKHG3	134.41	12.1	39	10	10	10	5	8	7	3	8	8	8	9	9	6	8	9	8	9	9	6	8	9	8	9	9	6	8	9	4027.5	5820.5	5885.1	2108.4	5466.3	5720.1	65816	72859	72876	44780	82168	73436	0.958637	1.06122	1.06147	0.652239	1.19681
A1L3X0	Elongation of very long chain fatty acids protein 7 OS=Homo sapiens OX=9606 GN=ELOVL7 PE=1 SV=1	ELOVL7	33.356	3.6	4	1	1	1	1	0	1	1	1	0	1	1	1	1	1	0	1	1	1	1	1	0	1	1	1	1	1	0	5710.4	4415	5930.3	4853.8	4903.4		0	0	0	0	0	0
A1X283	SH3 and PX domain-containing protein 2B OS=Homo sapiens OX=9606 GN=SH3PXD2B PE=1 SV=3	SH3PXD2B	101.58	15.6	36	11	10	11	8	7	5	9	5	2	10	11	9	10	9	8	9	10	8	9	8	7	10	11	9	10	9	8	9339.8	24302	6595	22720	6736.4	5697.1	293770	265360	237840	352870	220780	249130	1.08821	0.982967	0.881025	1.30713	0.81783
A2RRP1	Neuroblastoma-amplified sequence OS=Homo sapiens OX=9606 GN=NBAS PE=1 SV=2	NBAS	268.57	13.3	59	19	19	19	11	9	9	10	10	10	16	15	13	17	13	11	16	15	13	17	13	11	16	15	13	17	13	11	4056.8	3031.2	3053.1	4253.8	3028.7	2231.8	65151	49104	50350	66651	54228	45876	1.1797	0.889136	0.911697	1.20686	0.981917
A2RTX5	Threonine--tRNA ligase 2, cytoplasmic OS=Homo sapiens OX=9606 GN=TARS3 PE=1 SV=1	TARS3	92.644	9.9	5	6	3	3	0	1	1	1	1	1	5	4	6	4	5	6	2	1	3	1	2	3	2	1	3	1	2	3	749.71	459.55	887.61	646.56	853.17	944.7	0	0	0	0	0	0
A2VDF0	Fucose mutarotase OS=Homo sapiens OX=9606 GN=FUOM PE=1 SV=2	FUOM	16.765	20.1	7	2	2	2	2	1	1	2	1	0	2	2	1	2	2	0	2	2	1	2	2	0	2	2	1	2	2	0	9233.7	3163.6	1135.3	4621.1	2871.3		45065	14715	0	22371	13602	0	1.88255	0.614707		0.934529	0.568212
A3KN83	Protein strawberry notch homolog 1 OS=Homo sapiens OX=9606 GN=SBNO1 PE=1 SV=1	SBNO1	154.31	6.4	24	6	6	6	1	4	6	3	5	5	2	4	6	3	5	5	2	4	6	3	5	5	2	4	6	3	5	5	377.86	1510.3	1743.6	639.11	1849.9	1754	19397	30268	34107	18285	36113	35349	0.670716	1.04662	1.17936	0.632265	1.24873
A4D1E9	GTP-binding protein 10 OS=Homo sapiens OX=9606 GN=GTPBP10 PE=1 SV=1	GTPBP10	42.932	34.6	48	10	10	10	8	8	7	7	10	8	8	9	8	8	10	9	8	9	8	8	10	9	8	9	8	8	10	9	13376	15336	13768	11648	16268	12920	81925	89354	89917	68336	88822	81305	0.983771	1.07298	1.07974	0.820592	1.06659
A4D1P6	WD repeat-containing protein 91 OS=Homo sapiens OX=9606 GN=WDR91 PE=1 SV=2	WDR91	83.343	5.9	12	4	4	4	2	3	1	2	2	2	3	4	2	3	3	3	3	4	2	3	3	3	3	4	2	3	3	3	1491.2	1651.9	688.28	1914.5	1459.4	1183.9	24267	24313	15757	30677	19472	18703	1.0932	1.09527	0.709833	1.38196	0.87719
A4D1S5	Ras-related protein Rab-19 OS=Homo sapiens OX=9606 GN=RAB19 PE=1 SV=2	RAB19	24.4	11.1	2	2	2	2	0	0	1	1	0	0	2	0	1	1	1	1	2	0	1	1	1	1	2	0	1	1	1	1	5330.1		4646.1	2387.8	4710.8	5065.7	0	0	0	0	0	0
A5PLN9	Trafficking protein particle complex subunit 13 OS=Homo sapiens OX=9606 GN=TRAPPC13 PE=1 SV=2	TRAPPC13	46.523	9.1	4	2	2	2	0	0	1	1	0	2	2	1	2	2	2	2	2	1	2	2	2	2	2	1	2	2	2	2	945.79	584.76	1033.6	1163.1	1431	1169.4	11138	0	11745	12956	13304	13922	0.883057		0.931182	1.02719	1.05479
A5YKK6	CCR4-NOT transcription complex subunit 1 OS=Homo sapiens OX=9606 GN=CNOT1 PE=1 SV=2	CNOT1	266.94	27	217	50	50	50	35	38	37	33	39	35	42	45	44	44	45	42	42	45	44	44	45	42	42	45	44	44	45	42	22290	27978	24912	23202	27815	22524	177500	201170	197280	186540	198170	201580	0.916334	1.03853	1.01845	0.963002	1.02304
A6NCE7	Microtubule-associated proteins 1A/1B light chain 3 beta 2 OS=Homo sapiens OX=9606 GN=MAP1LC3B2 PE=2 SV=1	MAP1LC3B2	14.628	16.8	21	2	2	2	3	4	4	3	4	3	2	2	2	2	2	2	2	2	2	2	2	2	2	2	2	2	2	2	109810	106700	90383	105640	111420	85501	277600	244810	222190	252900	256070	231330	1.12169	0.989198	0.897798	1.02189	1.0347
A6ND36	Protein FAM83G OS=Homo sapiens OX=9606 GN=FAM83G PE=1 SV=2	FAM83G	90.834	8.7	7	4	3	4	2	1	1	1	1	1	3	2	3	1	2	3	3	2	2	1	2	3	3	2	3	1	2	3	1039	1111.5	1243.6	476.23	1146.9	925.98	30698	0	0	0	0	14709	1.35213
A6NDG6	Glycerol-3-phosphate phosphatase OS=Homo sapiens OX=9606 GN=PGP PE=1 SV=1	PGP	34.006	37.4	48	9	9	9	8	8	8	8	9	7	9	8	9	9	9	9	9	8	9	9	9	9	9	8	9	9	9	9	196410	182130	175840	176460	165170	157060	713380	670180	666560	657980	591980	603450	1.09651	1.03011	1.02455	1.01136	0.909915
A6NDU8	UPF0600 protein C5orf51 OS=Homo sapiens OX=9606 GN=C5orf51 PE=1 SV=1	C5orf51	33.62	32	13	6	6	6	1	3	3	2	2	2	2	4	3	2	5	2	2	4	3	2	5	2	2	4	3	2	5	2	3207.1	4176	8176.8	7831.2	12622	2414.2	70904	60223	80513	75944	92944	0	0.931653	0.791308	1.05791	0.997877	1.22125
A6NED2	RCC1 domain-containing protein 1 OS=Homo sapiens OX=9606 GN=RCCD1 PE=1 SV=1	RCCD1	40.078	3.5	1	1	1	1	0	1	0	0	0	0	0	1	0	1	1	0	0	1	0	1	1	0	0	1	0	1	1	0		1182.9		1639.2	1115.6		0	0	0	0	0	0
A6NFI3	Zinc finger protein 316 OS=Homo sapiens OX=9606 GN=ZNF316 PE=1 SV=1	ZNF316	108.44	2.1	2	1	1	1	1	0	0	1	0	0	1	0	0	1	1	0	1	0	0	1	1	0	1	0	0	1	1	0	186.2			207.06	39.325		0	0	0	0	0	0
A6NFQ2	TRPM8 channel-associated factor 2 OS=Homo sapiens OX=9606 GN=TCAF2 PE=1 SV=2	TCAF2	100.9	18.4	50	12	12	12	4	7	8	8	10	13	5	9	10	9	11	12	5	9	10	9	11	12	5	9	10	9	11	12	2729.2	10742	10251	10412	15654	16628	26172	70840	58531	67293	85546	92144	0.392064	1.0612	0.876812	1.00807	1.2815
A6NFX1	Major facilitator superfamily domain-containing protein 2B OS=Homo sapiens OX=9606 GN=MFSD2B PE=1 SV=4	MFSD2B	53.742	5.4	10	1	1	1	2	1	2	2	1	2	1	1	1	1	1	1	1	1	1	1	1	1	1	1	1	1	1	1	45855	44430	39434	43930	44662	37562	0	0	0	0	0	0
A6NHL2	Tubulin alpha chain-like 3 OS=Homo sapiens OX=9606 GN=TUBAL3 PE=1 SV=2	TUBAL3	49.908	10.5	10	4	2	2	2	1	2	2	2	1	4	3	4	4	3	3	2	1	2	2	1	1	2	1	2	2	1	1	52706	56203	47830	49936	56526	50607	1086800	1167200	1155700	1217800	1248600	1169300	0.92554	0.99401	0.984217	1.0371	1.06333
A6NHQ2	rRNA/tRNA 2'-O-methyltransferase fibrillarin-like protein 1 OS=Homo sapiens OX=9606 GN=FBLL1 PE=3 SV=2	FBLL1	34.803	11.1	3	3	1	1	0	0	0	1	1	1	3	3	3	3	3	3	1	1	1	1	1	1	1	1	1	1	1	1	14959	10539	15663	10660	9166.5	21837	0	0	0	0	0	0
A6NHR9	Structural maintenance of chromosomes flexible hinge domain-containing protein 1 OS=Homo sapiens OX=9606 GN=SMCHD1 PE=1 SV=2	SMCHD1	226.37	12.8	72	19	18	19	9	11	11	15	14	12	16	16	14	17	14	15	16	16	14	17	14	15	16	16	14	17	14	15	3932.5	3967.2	3450.9	4482.4	3810.1	4037.8	48147	48164	50122	55689	54771	54280	0.928365	0.928692	0.966446	1.07379	1.05609
A6NHX0	Cytosolic arginine sensor for mTORC1 subunit 2 OS=Homo sapiens OX=9606 GN=CASTOR2 PE=1 SV=3	CASTOR2	36.056	4.9	2	1	1	1	1	0	1	0	0	0	1	1	1	1	1	1	1	1	1	1	1	1	1	1	1	1	1	1	1129.9	1112.5	1135.4	894.86	616.24	729.61	0	0	0	0	0	0
A6NIH7	Protein unc-119 homolog B OS=Homo sapiens OX=9606 GN=UNC119B PE=1 SV=1	UNC119B	28.136	50.2	27	7	7	7	3	7	5	4	4	4	5	7	5	5	6	5	5	7	5	5	6	5	5	7	5	5	6	5	10408	18035	15319	12373	18053	15877	65243	95086	95104	79612	102870	101750	0.725372	1.05717	1.05737	0.885127	1.14371
A6NJ78	12S rRNA N4-methylcytidine (m4C) methyltransferase OS=Homo sapiens OX=9606 GN=METTL15 PE=1 SV=1	METTL15	46.121	17.9	26	5	5	5	6	4	4	5	4	3	5	5	5	4	5	4	5	5	5	4	5	4	5	5	5	4	5	4	6758.7	9625.3	9030.6	6795.8	9953	5922.4	64794	56747	63815	65852	53930	50111	1.09434	0.958432	1.07781	1.11221	0.910854
A6NKD9	Coiled-coil domain-containing protein 85C OS=Homo sapiens OX=9606 GN=CCDC85C PE=1 SV=1	CCDC85C	45.209	18.6	22	5	5	5	3	5	4	4	3	3	4	5	5	5	5	4	4	5	5	5	5	4	4	5	5	5	5	4	4052.8	34915	8920.1	29655	8772.1	7995.6	192710	175900	193620	187680	187710	200700	1.01576	0.927156	1.02056	0.989247	0.989405
A7E2V4	Zinc finger SWIM domain-containing protein 8 OS=Homo sapiens OX=9606 GN=ZSWIM8 PE=1 SV=1	ZSWIM8	197.3	0.9	3	1	1	1	0	1	1	0	1	0	0	1	1	0	1	0	0	1	1	0	1	0	0	1	1	0	1	0		104.72	67.859		55.656		0	0	0	0	0	0
A8CG34	Nuclear envelope pore membrane protein POM 121C OS=Homo sapiens OX=9606 GN=POM121C PE=1 SV=3	POM121C	125.09	9.7	33	8	8	8	6	6	5	7	6	3	6	7	6	8	6	5	6	7	6	8	6	5	6	7	6	8	6	5	7505.5	6547.9	5219.5	8056.6	5433.9	3527.9	64453	54733	53390	64960	52595	43715	1.15837	0.983681	0.959544	1.16748	0.945256
A8MTY0	Zinc finger protein 724 OS=Homo sapiens OX=9606 GN=ZNF724 PE=2 SV=3	ZNF724	71.172	3.9	4	2	2	2	0	2	0	0	1	1	0	2	1	0	2	1	0	2	1	0	2	1	0	2	1	0	2	1		819.86	329.28		838.26	159.29	0	16021	0	0	16349	0		0.989867			1.01013
P62308	Small nuclear ribonucleoprotein G OS=Homo sapiens OX=9606 GN=SNRPG PE=1 SV=1	SNRPG	8.496	15.8	6	1	1	1	1	1	1	1	1	1	1	1	1	1	1	1	1	1	1	1	1	1	1	1	1	1	1	1	343120	340650	328370	358970	361380	328500	0	0	0	0	0	0
Q9NUH8	Transmembrane protein 14B OS=Homo sapiens OX=9606 GN=TMEM14B PE=1 SV=1	TMEM14B	12.078	14.9	4	1	1	1	1	1	0	0	1	1	1	1	0	0	1	1	1	1	0	0	1	1	1	1	0	0	1	1	2206.5	2026.8			1994.1	1341.2	0	0	0	0	0	0
A9UHW6	MIF4G domain-containing protein OS=Homo sapiens OX=9606 GN=MIF4GD PE=1 SV=1	MIF4GD	25.423	24.3	8	4	4	4	1	1	0	4	1	1	2	2	2	4	2	2	2	2	2	4	2	2	2	2	2	4	2	2	7498	3225.5	3421.1	8729	3107	2115.1	45102	28787	29659	85664	28139	24845	1.11733	0.71315	0.734752	2.12218	0.697097
P0CG08	Golgi pH regulator B OS=Homo sapiens OX=9606 GN=GPR89B PE=1 SV=1	GPR89B	52.916	5.5	2	2	2	2	1	1	0	0	0	0	2	2	2	1	0	2	2	2	2	1	0	2	2	2	2	1	0	2	8073.6	4558.8	3487.3	3449.4		3636.7	133280	96623	0	0	0	0	1.15945	0.840554
C4AMC7	Putative WAS protein family homolog 3 OS=Homo sapiens OX=9606 GN=WASH3P PE=1 SV=2	WASH3P	49.994	21.8	37	7	2	7	7	6	6	6	5	7	7	7	7	7	6	7	2	2	2	2	1	2	7	7	7	7	6	7	23588	22466	21298	21509	19635	19486	131290	116940	129350	128200	121830	121820	1.05112	0.936232	1.03559	1.02638	0.975381
C9J7I0	UBAP1-MVB12-associated (UMA)-domain containing protein 1 OS=Homo sapiens OX=9606 GN=UMAD1 PE=1 SV=2	UMAD1	15.2	10.2	6	1	1	1	1	1	1	1	1	1	1	1	1	1	1	1	1	1	1	1	1	1	1	1	1	1	1	1	5181	5594.4	6409.1	5736	6468.2	6444.3	0	0	0	0	0	0
C9JLW8	Mapk-regulated corepressor-interacting protein 1 OS=Homo sapiens OX=9606 GN=MCRIP1 PE=1 SV=1	MCRIP1	10.92	18.6	5	1	1	1	1	1	1	1	1	0	1	1	1	1	1	1	1	1	1	1	1	1	1	1	1	1	1	1	5658.7	4835.5	4081.1	4039.1	5382.1	3334.7	0	0	0	0	0	0
E9PAV3	Nascent polypeptide-associated complex subunit alpha, muscle-specific form OS=Homo sapiens OX=9606 GN=NACA PE=1 SV=1	NACA	205.42	4.2	36	6	6	6	6	8	6	5	5	6	5	6	5	5	5	5	5	6	5	5	5	5	5	6	5	5	5	5	59816	74859	74551	57705	79418	70148	2202600	2613500	2839500	2115100	2820000	2632700	0.868111	1.03006	1.11913	0.833625	1.11145
E9PRG8	Uncharacterized protein C11orf98 OS=Homo sapiens OX=9606 GN=C11orf98 PE=4 SV=2	C11orf98	14.234	32.5	12	4	4	4	2	1	2	3	1	3	4	4	4	4	4	4	4	4	4	4	4	4	4	4	4	4	4	4	127210	125920	115380	131290	115440	111560	581600	490340	461680	507730	432200	431650	1.20116	1.01268	0.95349	1.0486	0.892606
L0R6Q1	SLC35A4 upstream open reading frame protein OS=Homo sapiens OX=9606 GN=SLC35A4 PE=3 SV=1	SLC35A4	11.133	30.1	4	2	2	2	0	2	1	1	0	0	1	2	1	1	1	2	1	2	1	1	1	2	1	2	1	1	1	2	14729	15614	11891	13450	15177	17328	0	70293	0	0	0	77303		0.952505
O00115	Deoxyribonuclease-2-alpha OS=Homo sapiens OX=9606 GN=DNASE2 PE=1 SV=2	DNASE2	39.58	8.6	12	3	3	3	1	3	2	2	2	2	2	3	3	3	3	3	2	3	3	3	3	3	2	3	3	3	3	3	4141.5	11359	12172	13556	12248	12642	102240	85906	99252	109780	92325	106040	1.03005	0.865489	0.999948	1.10602	0.93016
O00116	Alkyldihydroxyacetonephosphate synthase, peroxisomal OS=Homo sapiens OX=9606 GN=AGPS PE=1 SV=1	AGPS	72.911	45.4	120	20	20	20	20	22	21	18	19	20	18	19	18	19	16	19	18	19	18	19	16	19	18	19	18	19	16	19	90028	94567	81640	96038	82743	87728	359390	361280	365160	372190	343720	363150	0.996051	1.00129	1.01204	1.03153	0.952621
O00139	Kinesin-like protein KIF2A OS=Homo sapiens OX=9606 GN=KIF2A PE=1 SV=3	KIF2A	79.954	15	41	11	10	11	7	7	6	8	6	7	10	10	10	9	9	9	9	9	9	8	8	8	10	10	10	9	9	9	18965	14609	18632	19443	14842	16734	217370	198600	201780	230220	201900	216050	1.03025	0.941292	0.956364	1.09116	0.956933
O00142	Thymidine kinase 2, mitochondrial OS=Homo sapiens OX=9606 GN=TK2 PE=1 SV=4	TK2	31.004	16.2	7	3	3	3	1	1	1	2	1	1	2	2	3	3	3	1	2	2	3	3	3	1	2	2	3	3	3	1	5847.2	3524.6	4627.9	10305	4206.5	1794.4	63587	37028	29786	80083	26263	0	1.34293	0.782016	0.629068	1.69132	0.554664
O00148	ATP-dependent RNA helicase DDX39A OS=Homo sapiens OX=9606 GN=DDX39A PE=1 SV=2	DDX39A	49.129	56	43	19	8	8	5	9	9	6	7	7	18	19	19	18	18	19	7	8	8	7	7	8	7	8	8	7	7	8	90222	110290	104900	84947	85561	113660	389670	451990	442480	384750	441870	458560	0.909976	1.05551	1.0333	0.898487	1.03188
O00151	PDZ and LIM domain protein 1 OS=Homo sapiens OX=9606 GN=PDLIM1 PE=1 SV=4	PDLIM1	36.071	66.6	111	15	15	15	19	16	18	19	19	20	14	14	14	14	14	14	14	14	14	14	14	14	14	14	14	14	14	14	352980	403000	336890	406090	451640	377750	1013200	1111600	956150	1139800	1219200	1085900	0.931557	1.02203	0.879104	1.04795	1.12096
O00154	Cytosolic acyl coenzyme A thioester hydrolase OS=Homo sapiens OX=9606 GN=ACOT7 PE=1 SV=3	ACOT7	41.796	27.1	41	8	8	8	6	7	8	7	7	6	8	8	8	8	7	8	8	8	8	8	7	8	8	8	8	8	7	8	86797	83301	75648	79604	83764	84440	502000	461490	452900	483410	479770	498980	1.04636	0.961922	0.944017	1.00761	1.00002
O00159	Unconventional myosin-Ic OS=Homo sapiens OX=9606 GN=MYO1C PE=1 SV=4	MYO1C	121.68	42.8	187	34	34	34	34	31	31	29	32	30	34	30	31	31	30	29	34	30	31	31	30	29	34	30	31	31	30	29	109090	72864	80572	87904	66635	66760	448330	334610	357430	393530	312210	327620	1.2375	0.923601	0.98659	1.08623	0.861772
O00161	Synaptosomal-associated protein 23 OS=Homo sapiens OX=9606 GN=SNAP23 PE=1 SV=1	SNAP23	23.354	47.4	35	8	8	8	6	5	6	7	6	5	6	7	8	7	8	7	6	7	8	7	8	7	6	7	8	7	8	7	66611	73769	82381	86419	75734	81882	204760	173200	208190	209700	172980	210840	1.04144	0.880924	1.05889	1.06657	0.879805
O00165	HCLS1-associated protein X-1 OS=Homo sapiens OX=9606 GN=HAX1 PE=1 SV=2	HAX1	31.62	16.5	12	3	3	3	1	2	2	2	3	2	2	3	3	2	3	3	2	3	3	2	3	3	2	3	3	2	3	3	6155.1	8440.8	7369.5	6184.5	7944.5	6412.1	82214	84298	86463	87158	82126	74015	0.993975	1.01917	1.04535	1.05375	0.992911
O00170	AH receptor-interacting protein OS=Homo sapiens OX=9606 GN=AIP PE=1 SV=2	AIP	37.636	53.6	85	12	12	12	13	15	15	12	15	15	12	12	12	11	12	12	12	12	12	11	12	12	12	12	12	11	12	12	273660	294640	271920	290140	288080	281170	628230	645080	654340	656770	640880	702260	0.959726	0.985467	0.999613	1.00333	0.979051
O00178	GTP-binding protein 1 OS=Homo sapiens OX=9606 GN=GTPBP1 PE=1 SV=3	GTPBP1	72.453	22.3	45	11	11	11	8	5	7	8	9	8	10	9	11	11	10	10	10	9	11	11	10	10	10	9	11	11	10	10	16545	15705	13527	21302	15935	14482	147420	119760	104170	157460	120020	124690	1.1435	0.928948	0.80802	1.22138	0.930965
O00186	Syntaxin-binding protein 3 OS=Homo sapiens OX=9606 GN=STXBP3 PE=1 SV=2	STXBP3	67.764	27.5	51	13	13	13	8	8	8	8	9	10	10	12	11	10	11	12	10	12	11	10	11	12	10	12	11	10	11	12	22570	21431	18744	23002	20149	19728	110720	94962	95313	113810	96214	98359	1.09016	0.935006	0.938462	1.12058	0.947333
O00192	Armadillo repeat protein deleted in velo-cardio-facial syndrome OS=Homo sapiens OX=9606 GN=ARVCF PE=1 SV=1	ARVCF	104.64	8.6	11	5	5	5	2	1	1	4	1	2	3	2	2	5	2	2	3	2	2	5	2	2	3	2	2	5	2	2	853.79	27572	24030	29585	28099	25256	850340	1124100	1051900	1504900	1125300	933850	0.774164	1.0234	0.957667	1.37009	1.02449
O00193	Small acidic protein OS=Homo sapiens OX=9606 GN=SMAP PE=1 SV=1	SMAP	20.332	21.3	12	2	2	2	2	2	2	2	2	2	2	2	2	2	2	2	2	2	2	2	2	2	2	2	2	2	2	2	111980	96201	131280	100340	116080	115820	345320	273720	447390	296290	363410	408920	0.970432	0.769219	1.25727	0.832646	1.02127
O00194	Ras-related protein Rab-27B OS=Homo sapiens OX=9606 GN=RAB27B PE=1 SV=4	RAB27B	24.608	24.3	24	5	3	3	4	5	4	4	3	4	4	5	5	4	5	4	3	3	3	2	3	3	3	3	3	2	3	3	20150	33644	24632	18263	16648	21603	111450	180510	136830	129180	166280	114420	0.797334	1.2914	0.978907	0.924178	1.1896
O00203	AP-3 complex subunit beta-1 OS=Homo sapiens OX=9606 GN=AP3B1 PE=1 SV=3	AP3B1	121.32	28.8	108	23	23	23	18	20	17	18	19	16	19	23	23	21	20	20	19	23	23	21	20	20	19	23	23	21	20	20	36473	42633	41599	41322	38149	42576	276550	274690	283700	285360	276370	285420	0.986451	0.979817	1.01195	1.01788	0.985809
O00204	Sulfotransferase 2B1 OS=Homo sapiens OX=9606 GN=SULT2B1 PE=1 SV=2	SULT2B1	41.307	7.1	3	2	2	2	1	0	0	2	0	0	2	1	1	2	1	1	2	1	1	2	1	1	2	1	1	2	1	1	2773.1	760.2	937.16	3812.4	962.11	655.1	42176	0	0	68097	0	0	0.764938			1.23506
O00213	Amyloid beta precursor protein binding family B member 1 OS=Homo sapiens OX=9606 GN=APBB1 PE=1 SV=2	APBB1	77.243	2.5	1	1	1	1	0	0	0	0	0	1	1	1	0	1	1	1	1	1	0	1	1	1	1	1	0	1	1	1	171.03	295.78		58.768	316.26	236.46	0	0	0	0	0	0
O00214	Galectin-8 OS=Homo sapiens OX=9606 GN=LGALS8 PE=1 SV=4	LGALS8	35.808	10.1	7	3	3	3	0	2	1	0	3	1	1	3	3	1	3	3	1	3	3	1	3	3	1	3	3	1	3	3	1030.6	5718.6	3546.9	845.63	5976.6	4604	0	36085	31262	0	45600	37600		0.95877	0.830624		1.21158
O00217	NADH dehydrogenase [ubiquinone] iron-sulfur protein 8, mitochondrial OS=Homo sapiens OX=9606 GN=NDUFS8 PE=1 SV=1	NDUFS8	23.705	29	19	5	5	5	4	4	3	3	2	3	4	5	4	4	4	4	4	5	4	4	4	4	4	5	4	4	4	4	185600	197910	58647	181920	159410	33647	1477000	1321300	1006700	1376000	1243200	1056000	1.18473	1.05984	0.807492	1.10371	0.997193
O00220	Tumor necrosis factor receptor superfamily member 10A OS=Homo sapiens OX=9606 GN=TNFRSF10A PE=1 SV=3	TNFRSF10A	50.089	3.2	4	1	1	1	1	1	0	0	1	1	1	1	0	1	1	1	1	1	0	1	1	1	1	1	0	1	1	1	448.51	191.46		77.659	319.74	250.22	0	0	0	0	0	0
O00231	26S proteasome non-ATPase regulatory subunit 11 OS=Homo sapiens OX=9606 GN=PSMD11 PE=1 SV=3	PSMD11	47.463	63.3	125	23	23	23	18	23	22	18	23	21	22	23	22	21	22	22	22	23	22	21	22	22	22	23	22	21	22	22	287640	350890	327090	311400	326050	306430	1083600	1118000	1114400	1073700	1067100	1093200	0.992611	1.02412	1.02082	0.983542	0.977496
O00232	26S proteasome non-ATPase regulatory subunit 12 OS=Homo sapiens OX=9606 GN=PSMD12 PE=1 SV=3	PSMD12	52.904	57	136	25	25	25	22	23	25	23	22	21	23	25	24	23	24	23	23	25	24	23	24	23	23	25	24	23	24	23	235730	275270	239550	235560	262410	222260	593820	636570	614600	609070	584930	573990	0.986144	1.05714	1.02065	1.01147	0.971381
O00233	26S proteasome non-ATPase regulatory subunit 9 OS=Homo sapiens OX=9606 GN=PSMD9 PE=1 SV=3	PSMD9	24.682	39.9	44	8	8	8	8	7	7	8	8	6	8	7	8	8	8	8	8	7	8	8	8	8	8	7	8	8	8	8	134120	175820	175290	168380	182980	132930	412120	431820	439650	434200	442710	429370	0.954766	1.0004	1.01855	1.00592	1.02563
O00244	Copper transport protein ATOX1 OS=Homo sapiens OX=9606 GN=ATOX1 PE=1 SV=1	ATOX1	7.4016	52.9	33	3	3	3	6	6	4	6	6	5	3	3	2	3	3	3	3	3	2	3	3	3	3	3	2	3	3	3	508770	538000	528300	483910	552830	454100	889370	896050	946110	824290	923310	900010	0.992021	0.999472	1.05531	0.919429	1.02988
O00264	Membrane-associated progesterone receptor component 1 OS=Homo sapiens OX=9606 GN=PGRMC1 PE=1 SV=3	PGRMC1	21.671	36.9	16	5	4	4	3	2	3	4	2	2	4	2	3	5	2	3	3	2	3	4	2	2	3	2	3	4	2	2	210120	117110	169140	205410	119860	112950	630730	520270	514960	627020	533900	555790	1.11875	0.922827	0.913409	1.11217	0.947003
O00267	Transcription elongation factor SPT5 OS=Homo sapiens OX=9606 GN=SUPT5H PE=1 SV=1	SUPT5H	121	15.9	63	11	11	11	11	11	10	11	9	11	10	10	10	10	10	11	10	10	10	10	10	11	10	10	10	10	10	11	9357.3	10040	9510.9	10375	9538.9	9762.5	65715	67103	67026	65607	71266	70731	0.967706	0.988146	0.987012	0.966116	1.04945
O00268	Transcription initiation factor TFIID subunit 4 OS=Homo sapiens OX=9606 GN=TAF4 PE=1 SV=2	TAF4	110.11	3.1	10	2	2	2	2	2	2	1	1	2	2	2	2	2	1	2	2	2	2	2	1	2	2	2	2	2	1	2	986.08	1104.6	1066.7	1012.8	552.04	1023.8	23511	25407	26321	24084	0	26040	0.937717	1.01334	1.04979	0.960571
O00273	DNA fragmentation factor subunit alpha OS=Homo sapiens OX=9606 GN=DFFA PE=1 SV=1	DFFA	36.521	40.8	61	10	10	10	11	11	10	10	11	8	10	9	8	9	10	8	10	9	8	9	10	8	10	9	8	9	10	8	82018	61938	63717	72458	67494	60357	314950	234660	258810	286940	248400	256780	1.18066	0.879678	0.97021	1.07566	0.931186
O00291	Huntingtin-interacting protein 1 OS=Homo sapiens OX=9606 GN=HIP1 PE=1 SV=5	HIP1	116.22	26.6	100	20	19	20	18	18	14	20	14	16	20	16	16	18	18	16	19	15	15	17	17	15	20	16	16	18	18	16	32567	20180	20384	23902	22510	21157	208040	153350	185250	197110	151700	174480	1.16666	0.859963	1.03885	1.10536	0.85071
O00299	Chloride intracellular channel protein 1 OS=Homo sapiens OX=9606 GN=CLIC1 PE=1 SV=4	CLIC1	26.922	78.8	110	14	13	14	18	17	18	21	18	18	13	13	13	12	13	13	13	13	13	12	13	13	13	13	13	12	13	13	980650	927440	861320	969410	889060	900440	3865900	3386200	3500700	3723800	3291100	3610700	1.08499	0.950361	0.982496	1.04511	0.923671
O00303	Eukaryotic translation initiation factor 3 subunit F OS=Homo sapiens OX=9606 GN=EIF3F PE=1 SV=1	EIF3F	37.563	33.9	72	10	10	10	10	12	12	12	13	13	9	9	10	9	10	10	9	9	10	9	10	10	9	9	10	9	10	10	208790	240410	245940	186860	239140	215730	584420	621680	673250	522930	611190	622440	0.964413	1.0259	1.111	0.862942	1.00859
O00308	NEDD4-like E3 ubiquitin-protein ligase WWP2 OS=Homo sapiens OX=9606 GN=WWP2 PE=1 SV=2	WWP2	98.911	3.8	2	2	2	2	0	0	1	0	1	0	0	0	1	0	1	0	0	0	1	0	1	0	0	0	1	0	1	0			648.76		65.605		0	0	0	0	0	0
O00330	Pyruvate dehydrogenase protein X component, mitochondrial OS=Homo sapiens OX=9606 GN=PDHX PE=1 SV=3	PDHX	54.122	13	13	4	4	4	4	2	2	2	1	2	3	3	3	3	3	3	3	3	3	3	3	3	3	3	3	3	3	3	8662.5	9392.9	7338.4	9127.9	9088.6	7566	125010	189040	129820	180320	139480	112130	0.856428	1.29509	0.889381	1.23535	0.955561
O00391	Sulfhydryl oxidase 1 OS=Homo sapiens OX=9606 GN=QSOX1 PE=1 SV=3	QSOX1	82.577	9.6	11	5	5	5	2	1	2	1	4	1	3	2	3	1	4	2	3	2	3	1	4	2	3	2	3	1	4	2	1213.3	1155.2	1229.1	42.324	1323.6	950.91	32416	45293	37295	0	36861	35129	0.866766	1.21108	0.997225		0.98562
O00399	Dynactin subunit 6 OS=Homo sapiens OX=9606 GN=DCTN6 PE=1 SV=1	DCTN6	20.747	24.7	16	3	3	3	2	3	3	3	3	2	3	3	3	3	3	3	3	3	3	3	3	3	3	3	3	3	3	3	28171	28470	25447	26103	27683	27001	75878	72395	69114	75761	75992	77718	1.01882	0.972054	0.927999	1.01725	1.02035
O00400	Acetyl-coenzyme A transporter 1 OS=Homo sapiens OX=9606 GN=SLC33A1 PE=1 SV=1	SLC33A1	60.908	10.9	18	5	5	5	5	4	3	3	1	2	5	5	5	5	5	5	5	5	5	5	5	5	5	5	5	5	5	5	16671	14259	12612	17994	13488	13217	87848	64084	64229	90334	67725	65378	1.19902	0.874672	0.876651	1.23295	0.924367
O00401	Neural Wiskott-Aldrich syndrome protein OS=Homo sapiens OX=9606 GN=WASL PE=1 SV=2	WASL	54.826	25.9	39	9	9	9	6	8	8	6	5	6	7	9	7	7	6	7	7	9	7	7	6	7	7	9	7	7	6	7	7158.7	12875	14281	9085.9	7231.4	8224.4	59642	77253	67070	71543	65862	68359	0.873387	1.13128	0.982161	1.04766	0.964472
O00410	Importin-5 OS=Homo sapiens OX=9606 GN=IPO5 PE=1 SV=4	IPO5	123.63	52.4	251	42	40	42	42	39	43	44	41	42	38	37	37	38	37	38	36	35	35	36	36	36	38	37	37	38	37	38	183130	211770	192760	208780	195500	198990	823470	866860	892110	793310	886850	944470	0.948868	0.998865	1.02796	0.914115	1.0219
O00411	DNA-directed RNA polymerase, mitochondrial OS=Homo sapiens OX=9606 GN=POLRMT PE=1 SV=2	POLRMT	138.62	10.8	34	9	9	9	6	5	7	6	4	6	8	8	8	8	8	8	8	8	8	8	8	8	8	8	8	8	8	8	3302.9	2945.7	2592	2991.4	3214.8	2396.1	42100	36698	39751	39048	39714	37528	1.07563	0.937613	1.01561	0.997654	1.01467
O00418	Eukaryotic elongation factor 2 kinase OS=Homo sapiens OX=9606 GN=EEF2K PE=1 SV=2	EEF2K	82.143	13.2	11	7	7	7	1	1	2	1	3	3	2	2	2	3	4	3	2	2	2	3	4	3	2	2	2	3	4	3	1375.4	18520	2720.7	17470	22243	1917.2	0	391650	419630	414270	408110	393190		0.966154	1.03518	1.02195	1.00676
O00422	Histone deacetylase complex subunit SAP18 OS=Homo sapiens OX=9606 GN=SAP18 PE=1 SV=1	SAP18	17.561	49.7	36	7	7	7	5	8	7	5	5	6	7	7	7	5	7	7	7	7	7	5	7	7	7	7	7	5	7	7	58623	69927	57886	53959	63305	49221	160880	176210	157540	152850	155300	139160	1.02478	1.12243	1.0035	0.973629	0.989235
O00423	Echinoderm microtubule-associated protein-like 1 OS=Homo sapiens OX=9606 GN=EML1 PE=1 SV=3	EML1	89.86	8.6	23	6	6	6	3	5	4	2	4	5	5	5	5	5	5	6	5	5	5	5	5	6	5	5	5	5	5	6	3024.6	2939.6	2088.4	2963.3	2551.7	3460	43489	41573	47027	37684	34566	45892	1.04277	0.996831	1.12761	0.903581	0.828818
O00425	Insulin-like growth factor 2 mRNA-binding protein 3 OS=Homo sapiens OX=9606 GN=IGF2BP3 PE=1 SV=2	IGF2BP3	63.704	36.4	93	16	15	16	18	16	14	17	14	14	16	16	15	16	15	16	15	15	14	15	14	15	16	16	15	16	15	16	104180	106610	69825	102230	68720	107670	545780	420890	418100	555020	434520	467990	1.15212	0.888485	0.882595	1.17163	0.917257
O00429	Dynamin-1-like protein OS=Homo sapiens OX=9606 GN=DNM1L PE=1 SV=2	DNM1L	81.876	61.3	207	34	34	34	34	32	37	34	34	36	32	31	32	31	31	31	32	31	32	31	31	31	32	31	32	31	31	31	64709	61974	56530	58363	68871	71859	242990	231800	229810	237630	246450	255910	1.00924	0.962765	0.954499	0.986979	1.02361
O00442	RNA 3'-terminal phosphate cyclase OS=Homo sapiens OX=9606 GN=RTCA PE=1 SV=1	RTCA	39.336	23	28	6	6	6	5	5	4	5	4	5	4	5	5	5	6	5	4	5	5	5	6	5	4	5	5	5	6	5	21136	16601	18908	19863	17555	16041	176990	131380	151670	156660	123660	130840	1.21894	0.904821	1.04456	1.07893	0.851653
O00443	Phosphatidylinositol 4-phosphate 3-kinase C2 domain-containing subunit alpha OS=Homo sapiens OX=9606 GN=PIK3C2A PE=1 SV=2	PIK3C2A	190.68	6.4	28	9	9	9	4	5	5	4	4	6	7	7	8	8	8	9	7	7	8	8	8	9	7	7	8	8	8	9	10575	9576	9789.7	8076.7	6903.7	6128.2	581730	523990	485820	556650	460100	481840	1.12952	1.01741	0.9433	1.08083	0.89336
O00458	Interferon-related developmental regulator 1 OS=Homo sapiens OX=9606 GN=IFRD1 PE=1 SV=4	IFRD1	50.268	22	21	6	6	6	5	3	5	4	3	1	6	6	5	5	4	4	6	6	5	5	4	4	6	6	5	5	4	4	10909	8788.4	8537.3	9209.7	4609.7	4505.5	78717	62549	64472	71234	40925	28289	1.3643	1.08408	1.11741	1.23461	0.709301
O00459	Phosphatidylinositol 3-kinase regulatory subunit beta OS=Homo sapiens OX=9606 GN=PIK3R2 PE=1 SV=2	PIK3R2	81.544	8.9	6	3	3	3	1	0	0	3	1	1	2	0	1	3	1	2	2	0	1	3	1	2	2	0	1	3	1	2	567.15		386.37	615.87	324.16	353.16	17001	0	0	21903	0	12461	0.992952			1.27926
O00461	Golgi integral membrane protein 4 OS=Homo sapiens OX=9606 GN=GOLIM4 PE=1 SV=1	GOLIM4	81.879	15.2	37	8	8	8	4	7	7	5	7	7	6	8	8	6	8	7	6	8	8	6	8	7	6	8	8	6	8	7	4353.7	7707.3	6824.1	4586.5	7891.6	7034.1	48678	59273	54901	50149	60631	65464	0.861314	1.04878	0.971424	0.887342	1.07281
O00468	Agrin OS=Homo sapiens OX=9606 GN=AGRN PE=1 SV=6	AGRN	217.32	9.8	44	13	13	13	4	6	6	9	10	9	6	10	9	10	11	10	6	10	9	10	11	10	6	10	9	10	11	10	1287.2	1928.7	1485.5	2351.8	2868.9	2140.5	27206	27159	25597	36146	38450	39466	0.841319	0.839865	0.791562	1.11778	1.18903
O00469	Procollagen-lysine,2-oxoglutarate 5-dioxygenase 2 OS=Homo sapiens OX=9606 GN=PLOD2 PE=1 SV=2	PLOD2	84.685	28.6	101	18	18	18	14	17	15	13	21	21	17	15	17	17	18	18	17	15	17	17	18	18	17	15	17	17	18	18	46546	61635	57313	53898	82007	89220	220940	295830	289650	257610	367130	431750	0.711596	0.9528	0.932895	0.829702	1.18244
O00471	Exocyst complex component 5 OS=Homo sapiens OX=9606 GN=EXOC5 PE=1 SV=1	EXOC5	81.852	35.6	87	19	19	19	14	16	14	15	15	13	17	16	17	19	18	15	17	16	17	19	18	15	17	16	17	19	18	15	28828	30770	26835	30722	30375	24961	386100	351110	340980	432600	354570	348730	1.0463	0.951479	0.924027	1.17231	0.960855
O00483	Cytochrome c oxidase subunit NDUFA4 OS=Homo sapiens OX=9606 GN=NDUFA4 PE=1 SV=1	NDUFA4	9.3697	46.9	13	4	4	4	2	2	3	2	2	2	4	3	4	2	3	3	4	3	4	2	3	3	4	3	4	2	3	3	83008	81524	100870	52723	71519	94633	248180	253800	331460	269510	302870	345800	0.850116	0.869367	1.13538	0.92318	1.03745
O00487	26S proteasome non-ATPase regulatory subunit 14 OS=Homo sapiens OX=9606 GN=PSMD14 PE=1 SV=1	PSMD14	34.577	49	65	11	11	11	10	13	12	11	10	9	11	11	11	11	11	10	11	11	11	11	11	10	11	11	11	11	11	10	143640	148340	143340	145370	140650	141600	727590	702990	721460	749040	669080	683790	1.02623	0.991535	1.01759	1.05649	0.943706
O00488	Zinc finger protein 593 OS=Homo sapiens OX=9606 GN=ZNF593 PE=1 SV=2	ZNF593	15.199	39.6	15	4	4	4	3	2	1	1	4	4	4	3	2	2	4	4	4	3	2	2	4	4	4	3	2	2	4	4	22580	14574	11404	10331	17298	14362	58676	55053	46809	42778	57753	39498	1.17131	1.09898	0.934414	0.853946	1.15288
O00499	Myc box-dependent-interacting protein 1 OS=Homo sapiens OX=9606 GN=BIN1 PE=1 SV=1	BIN1	64.699	27.3	55	12	12	12	9	9	9	9	9	10	9	11	11	10	10	12	9	11	11	10	10	12	9	11	11	10	10	12	18135	24320	21751	20277	25359	24968	97919	102280	104260	109420	112920	123470	0.903494	0.943733	0.962002	1.00961	1.04191
O00505	Importin subunit alpha-4 OS=Homo sapiens OX=9606 GN=KPNA3 PE=1 SV=2	KPNA3	57.81	40.5	43	12	9	9	7	9	6	7	8	6	9	12	8	9	10	9	6	9	5	6	7	6	6	9	5	6	7	6	16156	26221	17721	19940	22898	19078	85289	104100	98939	84984	114030	105640	0.862984	1.05332	1.0011	0.859898	1.1538
O00506	Serine/threonine-protein kinase 25 OS=Homo sapiens OX=9606 GN=STK25 PE=1 SV=1	STK25	48.111	2.3	5	1	1	1	1	1	1	1	0	1	1	1	1	1	1	1	1	1	1	1	1	1	1	1	1	1	1	1	1096.6	1462.1	1148.9	1063.7	1527.1	1122.5	0	0	0	0	0	0
O00507	Probable ubiquitin carboxyl-terminal hydrolase FAF-Y OS=Homo sapiens OX=9606 GN=USP9Y PE=2 SV=2	USP9Y	291.07	11.5	7	26	2	2	1	2	1	1	0	2	24	24	24	23	24	25	1	2	1	1	1	2	1	2	1	1	1	2	576.12	1379.6	493.02	522.86	573.79	1547.6	0	100560	0	0	0	125840		0.888339
O00515	Ladinin-1 OS=Homo sapiens OX=9606 GN=LAD1 PE=1 SV=2	LAD1	57.13	32.7	52	13	13	13	10	9	8	8	8	9	13	12	11	12	11	11	13	12	11	12	11	11	13	12	11	12	11	11	73705	74915	64434	69931	70497	59227	396260	429270	417160	421530	392360	379820	0.97585	1.05714	1.02732	1.03808	0.966245
O00522	Krev interaction trapped protein 1 OS=Homo sapiens OX=9606 GN=KRIT1 PE=1 SV=2	KRIT1	84.347	4.6	9	2	2	2	1	1	2	1	2	2	1	1	2	2	2	2	1	1	2	2	2	2	1	1	2	2	2	2	367.09	450.74	787.6	606.74	754.39	726.85	0	0	18515	14047	16536	17647			1.1096	0.841831	0.990996
O00534	von Willebrand factor A domain-containing protein 5A OS=Homo sapiens OX=9606 GN=VWA5A PE=1 SV=2	VWA5A	86.488	9	8	4	4	4	4	1	1	2	0	0	4	2	2	2	1	1	4	2	2	2	1	1	4	2	2	2	1	1	1402	679.3	605.82	941.91	331.24	252	24938	15592	16122	26943	0	0	1.19328	0.746073	0.771434	1.28922
O00541	Pescadillo homolog OS=Homo sapiens OX=9606 GN=PES1 PE=1 SV=1	PES1	68.002	33.3	72	18	18	18	12	12	13	11	12	12	17	18	17	17	17	18	17	18	17	17	17	18	17	18	17	17	17	18	93419	97914	87589	89259	99498	95327	391950	325800	362020	359430	356290	350410	1.0959	0.910946	1.01222	1.00498	0.996197
O00559	Receptor-binding cancer antigen expressed on SiSo cells OS=Homo sapiens OX=9606 GN=EBAG9 PE=1 SV=1	EBAG9	24.377	8.9	5	1	1	1	1	0	1	1	1	1	1	1	1	1	1	1	1	1	1	1	1	1	1	1	1	1	1	1	6828.4	7388.8	5805.7	5395.2	7536.8	1815.7	0	0	0	0	0	0
O00560	Syntenin-1 OS=Homo sapiens OX=9606 GN=SDCBP PE=1 SV=1	SDCBP	32.444	29.2	25	6	5	6	4	3	5	2	5	6	5	5	6	5	6	5	5	5	5	5	5	5	5	5	6	5	6	5	120570	179750	186900	91593	160620	171280	450470	671700	761180	344390	595280	716260	0.763664	1.13871	1.2904	0.583831	1.00915
O00562	Membrane-associated phosphatidylinositol transfer protein 1 OS=Homo sapiens OX=9606 GN=PITPNM1 PE=1 SV=4	PITPNM1	134.85	11	21	8	8	8	3	4	1	6	3	4	6	5	3	6	4	5	6	5	3	6	4	5	6	5	3	6	4	5	946.83	951.14	544.31	1284.7	1034.9	1607.4	19554	16842	14980	29918	22451	22916	0.926284	0.797815	0.709611	1.41723	1.06352
O00566	U3 small nucleolar ribonucleoprotein protein MPP10 OS=Homo sapiens OX=9606 GN=MPHOSPH10 PE=1 SV=2	MPHOSPH10	78.863	23.5	42	9	9	9	8	7	6	7	7	7	9	8	7	6	7	8	9	8	7	6	7	8	9	8	7	6	7	8	27134	24129	24791	23477	22750	23419	145720	126900	134720	140520	128880	127740	1.08681	0.94645	1.00477	1.04803	0.961217
O00567	Nucleolar protein 56 OS=Homo sapiens OX=9606 GN=NOP56 PE=1 SV=4	NOP56	66.049	64.5	143	27	27	27	22	25	24	24	25	23	24	27	25	25	26	24	24	27	25	25	26	24	24	27	25	25	26	24	140360	136910	143130	141930	141070	130710	481110	413730	438200	474280	424630	439420	1.08059	0.929254	0.984214	1.06525	0.953735
O00571	ATP-dependent RNA helicase DDX3X OS=Homo sapiens OX=9606 GN=DDX3X PE=1 SV=3	DDX3X	73.243	53.9	183	31	30	31	27	35	33	27	30	31	29	29	31	31	30	30	28	28	30	30	29	29	29	29	31	31	30	30	232720	285490	281650	230370	290190	279480	1015900	1121400	1178700	948960	1088100	1222000	0.927049	1.02332	1.07561	0.865963	0.992934
O00584	Ribonuclease T2 OS=Homo sapiens OX=9606 GN=RNASET2 PE=1 SV=2	RNASET2	29.48	16	7	3	3	3	1	1	1	2	1	1	2	2	2	3	2	2	2	2	2	3	2	2	2	2	2	3	2	2	4303.1	3337.6	3645.6	4633.2	3781.7	4066.1	52112	31219	47130	49275	51430	50943	1.10834	0.663977	1.00238	1.048	1.09383
O00623	Peroxisome assembly protein 12 OS=Homo sapiens OX=9606 GN=PEX12 PE=1 SV=1	PEX12	40.797	4.2	5	1	1	1	1	1	1	1	0	1	1	1	1	1	0	1	1	1	1	1	0	1	1	1	1	1	0	1	1290.2	751.5	665.14	1524.2		443.15	0	0	0	0	0	0
O00625	Pirin OS=Homo sapiens OX=9606 GN=PIR PE=1 SV=1	PIR	32.113	29.3	24	5	5	5	4	4	2	6	4	4	4	4	3	5	4	4	4	4	3	5	4	4	4	4	3	5	4	4	8988.8	7238.1	6432.9	16938	8377.8	8473.7	66679	56836	58623	124580	66565	75556	0.891353	0.759774	0.783662	1.66536	0.889829
O00629	Importin subunit alpha-3 OS=Homo sapiens OX=9606 GN=KPNA4 PE=1 SV=1	KPNA4	57.886	48.8	106	14	11	14	15	21	18	17	18	17	12	13	13	13	14	13	9	10	10	10	11	10	12	13	13	13	14	13	226200	256520	224710	214360	253180	221300	470170	502200	486880	447050	488860	453840	0.990179	1.05763	1.02537	0.941488	1.02954
O00635	E3 ubiquitin-protein ligase TRIM38 OS=Homo sapiens OX=9606 GN=TRIM38 PE=1 SV=1	TRIM38	53.415	5.6	2	2	2	2	0	0	0	1	1	0	1	1	1	2	2	1	1	1	1	2	2	1	1	1	1	2	2	1	1443.8	1116.8	372.77	1536.8	1771.2	949.28	0	0	0	25060	29395	0				0.920393	1.07961
O00743	Serine/threonine-protein phosphatase 6 catalytic subunit OS=Homo sapiens OX=9606 GN=PPP6C PE=1 SV=1	PPP6C	35.144	40.7	53	9	9	9	9	9	8	7	12	8	8	8	8	8	9	9	8	8	8	8	9	9	8	8	8	8	9	9	58758	67402	61496	62318	66802	62255	244640	270350	258420	265730	253730	260910	0.94469	1.04397	0.997902	1.02613	0.979791
O00754	Lysosomal alpha-mannosidase OS=Homo sapiens OX=9606 GN=MAN2B1 PE=1 SV=3	MAN2B1	113.74	13.7	45	10	10	10	7	4	5	12	8	9	9	8	8	10	9	9	9	8	8	10	9	9	9	8	8	10	9	9	7322.1	4883.2	4586.3	10347	6316.6	6222.1	95124	64581	61788	109490	77184	76473	1.17767	0.799534	0.764955	1.35552	0.955563
O00762	Ubiquitin-conjugating enzyme E2 C OS=Homo sapiens OX=9606 GN=UBE2C PE=1 SV=1	UBE2C	19.652	64.8	27	7	7	7	1	6	5	1	6	8	5	6	4	2	5	6	5	6	4	2	5	6	5	6	4	2	5	6	31024	62808	53932	3895.5	70249	79727	31379	255590	334220	26769	392850	414060	0.12941	1.05408	1.37835	0.110398	1.62015
O00764	Pyridoxal kinase OS=Homo sapiens OX=9606 GN=PDXK PE=1 SV=1	PDXK	35.102	47.1	76	11	11	11	13	12	14	13	14	10	11	11	11	11	11	10	11	11	11	11	11	10	11	11	11	11	11	10	211570	193840	200050	188220	189080	186070	1056700	923090	962800	944450	869110	924790	1.11605	0.974934	1.01687	0.997493	0.917922
O00767	Stearoyl-CoA desaturase OS=Homo sapiens OX=9606 GN=SCD PE=1 SV=2	SCD	41.522	19.2	8	3	3	3	0	2	2	1	1	2	0	3	3	1	1	2	0	3	3	1	1	2	0	3	3	1	1	2		10809	11874	1897.5	7563.8	11329	0	69060	95869	0	0	153170		0.651307	0.904143
O14490	Disks large-associated protein 1 OS=Homo sapiens OX=9606 GN=DLGAP1 PE=1 SV=1	DLGAP1	108.87	1.6	2	1	1	1	1	0	1	0	0	0	1	1	1	1	1	1	1	1	1	1	1	1	1	1	1	1	1	1	2118	1536.2	1464.5	1740.9	1284.9	1074.9	0	0	0	0	0	0
O14493	Claudin-4 OS=Homo sapiens OX=9606 GN=CLDN4 PE=1 SV=1	CLDN4	22.077	12.9	14	2	1	2	2	2	3	2	2	3	2	2	2	2	2	2	1	1	1	1	1	1	2	2	2	2	2	2	172590	167580	162910	247760	151600	141330	637010	643750	660010	975040	581030	592840
O14494	Phospholipid phosphatase 1 OS=Homo sapiens OX=9606 GN=PLPP1 PE=1 SV=1	PLPP1	32.156	7	6	1	1	1	1	1	1	1	1	1	1	1	1	1	1	1	1	1	1	1	1	1	1	1	1	1	1	1	6114.5	9172.8	8075.1	4484.4	7106.8	6502.4	0	0	0	0	0	0
O14497	AT-rich interactive domain-containing protein 1A OS=Homo sapiens OX=9606 GN=ARID1A PE=1 SV=3	ARID1A	242.04	9.9	42	14	13	14	6	7	7	7	8	7	13	13	10	13	12	11	12	12	9	12	11	11	13	13	10	13	12	11	3958.2	5067.9	2409.3	4613.4	3017.2	2700	62011	77806	80542	74624	72174	82007	0.828352	1.03934	1.07589	0.996839	0.964111
O14519	Cyclin-dependent kinase 2-associated protein 1 OS=Homo sapiens OX=9606 GN=CDK2AP1 PE=1 SV=1	CDK2AP1	12.365	20	3	2	1	2	0	1	0	0	1	1	0	2	1	0	1	1	0	1	0	0	0	0	0	2	1	0	1	1		9324.6	8133.4		7998.3	4429.4	0	0	0	0	0	0
O14524	Nuclear envelope integral membrane protein 1 OS=Homo sapiens OX=9606 GN=NEMP1 PE=1 SV=2	NEMP1	50.639	4.5	5	2	2	2	2	1	0	1	0	1	2	1	2	1	2	1	2	1	2	1	2	1	2	1	2	1	2	1	5750.3	884.57	4902.1	984.19	4990.9	768.24	84369	0	71514	0	68738	0	1.12682		0.955129		0.918053
O14530	Thioredoxin domain-containing protein 9 OS=Homo sapiens OX=9606 GN=TXNDC9 PE=1 SV=2	TXNDC9	26.534	27	27	6	6	6	5	4	6	3	5	4	4	5	5	4	5	5	4	5	5	4	5	5	4	5	5	4	5	5	24326	31535	30573	21513	30922	32242	98777	120060	125220	88747	118480	117480	0.886205	1.07715	1.12345	0.796218	1.06298
O14545	TRAF-type zinc finger domain-containing protein 1 OS=Homo sapiens OX=9606 GN=TRAFD1 PE=1 SV=1	TRAFD1	64.84	27.5	43	10	10	10	5	9	7	4	9	9	7	9	8	7	10	8	7	9	8	7	10	8	7	9	8	7	10	8	10324	44574	29790	19495	43293	33825	78964	265660	186020	127310	273170	230020	0.408032	1.37275	0.961224	0.657851	1.41156
O14548	Cytochrome c oxidase subunit 7A-related protein, mitochondrial OS=Homo sapiens OX=9606 GN=COX7A2L PE=1 SV=2	COX7A2L	12.615	28.9	6	1	1	1	1	1	1	1	1	1	1	1	1	1	1	1	1	1	1	1	1	1	1	1	1	1	1	1	25485	29392	20966	24459	22167	19666	0	0	0	0	0	0
O14558	Heat shock protein beta-6 OS=Homo sapiens OX=9606 GN=HSPB6 PE=1 SV=2	HSPB6	17.135	68.8	49	6	6	6	7	8	10	9	8	7	6	6	6	6	5	6	6	6	6	6	5	6	6	6	6	6	5	6	159940	104050	129530	141400	108440	115700	311230	171950	205770	225730	215390	234740	1.36823	0.755929	0.904609	0.992358	0.946901
O14561	Acyl carrier protein, mitochondrial OS=Homo sapiens OX=9606 GN=NDUFAB1 PE=1 SV=3	NDUFAB1	17.417	15.4	15	3	3	3	3	2	3	2	2	3	3	3	3	3	3	3	3	3	3	3	3	3	3	3	3	3	3	3	298890	306180	264250	293860	262240	252230	1628600	1618300	1407900	1679900	1564000	1522900	1.03715	1.03059	0.896599	1.06982	0.996009
O14562	Ubiquitin domain-containing protein UBFD1 OS=Homo sapiens OX=9606 GN=UBFD1 PE=1 SV=2	UBFD1	33.382	21	23	5	5	5	4	3	4	5	3	4	5	5	5	5	4	5	5	5	5	5	4	5	5	5	5	5	4	5	53927	47118	50019	47901	46335	44149	191270	162700	180740	176000	171540	173690	1.08682	0.924484	1.02699	1.00006	0.974714
O14569	Transmembrane reductase CYB561D2 OS=Homo sapiens OX=9606 GN=CYB561D2 PE=1 SV=1	CYB561D2	23.973	5.4	8	1	1	1	1	1	2	1	2	1	1	1	1	1	1	1	1	1	1	1	1	1	1	1	1	1	1	1	8781.6	10216	8020.3	8024.5	13701	8521.1	25410	26359	24482	19233	40404	0
O14578	Citron Rho-interacting kinase OS=Homo sapiens OX=9606 GN=CIT PE=1 SV=2	CIT	231.43	1.3	7	2	2	2	0	2	1	0	2	2	0	2	1	0	2	2	0	2	1	0	2	2	0	2	1	0	2	2		365.55	244.96		336.82	359.36	0	31648	0	0	30535	34366		0.983376			0.948793
O14579	Coatomer subunit epsilon OS=Homo sapiens OX=9606 GN=COPE PE=1 SV=3	COPE	34.482	54.9	71	10	10	10	12	13	11	10	12	13	10	9	10	7	9	9	10	9	10	7	9	9	10	9	10	7	9	9	225970	241590	233160	181070	244970	236150	982550	1049800	1043300	942790	1039600	1083800	0.959859	1.02556	1.01921	0.921017	1.01559
O14617	AP-3 complex subunit delta-1 OS=Homo sapiens OX=9606 GN=AP3D1 PE=1 SV=1	AP3D1	130.16	36.4	192	32	32	32	35	32	31	33	34	27	31	31	32	30	30	31	31	31	32	30	30	31	31	31	32	30	30	31	87963	80339	80717	83106	74861	74861	354500	317700	328350	343770	299060	316990	1.085	0.972367	1.00496	1.05216	0.915317
O14618	Copper chaperone for superoxide dismutase OS=Homo sapiens OX=9606 GN=CCS PE=1 SV=1	CCS	29.04	32.5	30	7	7	7	4	4	7	5	5	5	7	7	7	6	6	7	7	7	7	6	6	7	7	7	7	6	6	7	90724	106760	105960	71712	83124	111510	292570	323260	340440	303640	333290	344720	0.905827	1.00085	1.05404	0.940101	1.0319
O14639	Actin-binding LIM protein 1 OS=Homo sapiens OX=9606 GN=ABLIM1 PE=1 SV=3	ABLIM1	87.687	12.2	22	7	7	7	7	1	4	5	3	2	7	2	5	6	4	3	7	2	5	6	4	3	7	2	5	6	4	3	5134.6	1133.9	2328.6	3206.6	1558.4	1517	109620	36719	61180	74870	37506	46265	1.79626	0.601688	1.00251	1.22684	0.614584
O14641	Segment polarity protein dishevelled homolog DVL-2 OS=Homo sapiens OX=9606 GN=DVL2 PE=1 SV=1	DVL2	78.947	5	13	3	3	3	2	2	2	3	2	2	3	3	3	3	3	3	3	3	3	3	3	3	3	3	3	3	3	3	6779.8	7078	6498.9	6419.3	6626.5	5980.2	106400	113090	104330	109270	105510	102770	0.995369	1.05795	0.976004	1.02222	0.987043
O14646	Chromodomain-helicase-DNA-binding protein 1 OS=Homo sapiens OX=9606 GN=CHD1 PE=1 SV=2	CHD1	196.69	9	23	11	8	8	2	5	5	4	5	2	6	9	8	7	10	8	4	7	6	4	8	5	4	7	6	4	8	5	767.49	1807.7	1338	814.97	1766	1432.1	35759	51473	52794	33921	56338	54411	0.753625	1.0848	1.11264	0.714889	1.18733
O14647	Chromodomain-helicase-DNA-binding protein 2 OS=Homo sapiens OX=9606 GN=CHD2 PE=1 SV=2	CHD2	211.34	9	43	12	9	12	9	5	8	11	3	7	9	8	10	11	7	9	7	6	8	8	5	6	9	8	10	11	7	9	3385.2	2678.7	2738.5	4566.4	2442.5	2357.3	51426	44834	45058	64932	42456	44684	1.05169	0.916882	0.921463	1.3279	0.86825
O14653	Golgi SNAP receptor complex member 2 OS=Homo sapiens OX=9606 GN=GOSR2 PE=1 SV=2	GOSR2	24.775	36.3	19	5	5	5	4	3	1	4	5	2	3	3	3	3	5	4	3	3	3	3	5	4	3	3	3	3	5	4	24728	19259	20568	17467	51752	19825	162760	152280	134280	100490	209610	88246	1.15206	1.07788	0.950469	0.711294	1.48367
O14656	Torsin-1A OS=Homo sapiens OX=9606 GN=TOR1A PE=1 SV=1	TOR1A	37.808	26.5	23	7	7	7	4	2	5	3	5	4	6	5	6	6	6	6	6	5	6	6	6	6	6	5	6	6	6	6	18201	12692	14061	17208	17054	12913	99015	88561	94257	89635	95288	82850	1.08094	0.966813	1.029	0.978537	1.04025
O14657	Torsin-1B OS=Homo sapiens OX=9606 GN=TOR1B PE=1 SV=2	TOR1B	37.978	27.4	32	7	7	7	5	6	5	4	7	5	7	7	6	6	7	6	7	7	6	6	7	6	7	7	6	6	7	6	15566	18217	14594	14639	18302	14488	79232	91311	82919	80850	92165	89329	0.921649	1.06215	0.964537	0.94047	1.07209
O14662	Syntaxin-16 OS=Homo sapiens OX=9606 GN=STX16 PE=1 SV=3	STX16	37.031	34.5	26	6	6	6	5	3	5	5	3	5	6	5	5	5	4	6	6	5	5	5	4	6	6	5	5	5	4	6	13203	11912	11333	12076	9730.3	11010	61023	55418	51965	58749	52511	50147	1.11014	1.00817	0.945354	1.06877	0.955287
O14672	Disintegrin and metalloproteinase domain-containing protein 10 OS=Homo sapiens OX=9606 GN=ADAM10 PE=1 SV=1	ADAM10	84.141	37.7	83	18	18	18	12	14	14	12	14	17	13	15	15	15	15	17	13	15	15	15	15	17	13	15	15	15	15	17	29622	33551	31894	32813	34997	36127	199050	211060	207870	222270	213350	211180	0.944275	1.00125	0.986116	1.05443	1.01211
O14681	Etoposide-induced protein 2.4 homolog OS=Homo sapiens OX=9606 GN=EI24 PE=1 SV=4	EI24	38.964	3.2	1	1	1	1	0	0	0	1	0	0	1	1	1	1	1	1	1	1	1	1	1	1	1	1	1	1	1	1	4333	4300.7	4662.9	4549.9	5010.8	4791.8	0	0	0	0	0	0
O14684	Prostaglandin E synthase OS=Homo sapiens OX=9606 GN=PTGES PE=1 SV=2	PTGES	17.102	13.2	9	2	2	2	2	2	1	2	1	1	2	2	2	2	2	2	2	2	2	2	2	2	2	2	2	2	2	2	8703	10669	11314	6088.5	11390	12143	36736	43371	50930	24367	46649	54890	0.85784	1.01278	1.18929	0.569006	1.08932
O14713	Integrin beta-1-binding protein 1 OS=Homo sapiens OX=9606 GN=ITGB1BP1 PE=1 SV=1	ITGB1BP1	21.782	18	6	2	2	2	1	2	2	0	1	0	2	2	2	1	2	1	2	2	2	1	2	1	2	2	2	1	2	1	4434.4	4631.6	4736.7	2640.3	4454.6	1306	33194	34076	35220	0	32212	0	0.985702	1.01189	1.04586		0.956541
O14727	Apoptotic protease-activating factor 1 OS=Homo sapiens OX=9606 GN=APAF1 PE=1 SV=2	APAF1	141.84	3.4	7	3	3	3	1	1	0	1	3	1	1	2	1	1	3	2	1	2	1	1	3	2	1	2	1	1	3	2	2526.7	2878.6	2852	2431.1	2815.4	2243.6	0	141930	0	0	183530	144460		0.90609			1.17167
O14730	Serine/threonine-protein kinase RIO3 OS=Homo sapiens OX=9606 GN=RIOK3 PE=1 SV=2	RIOK3	59.092	7.3	2	2	2	2	0	0	0	2	0	0	1	0	0	2	0	0	1	0	0	2	0	0	1	0	0	2	0	0	326.45			558			0	0	0	0	0	0
O14732	Inositol monophosphatase 2 OS=Homo sapiens OX=9606 GN=IMPA2 PE=1 SV=1	IMPA2	31.321	23.3	19	5	5	5	2	3	4	2	3	5	4	4	5	3	4	5	4	4	5	3	4	5	4	4	5	3	4	5	9698.8	14847	13905	11560	13012	14011	46675	72325	54225	59458	60674	57873	0.797341	1.23551	0.926316	1.01571	1.03648
O14733	Dual specificity mitogen-activated protein kinase kinase 7 OS=Homo sapiens OX=9606 GN=MAP2K7 PE=1 SV=2	MAP2K7	47.484	9.3	14	4	4	4	2	3	1	3	4	1	4	3	3	4	4	3	4	3	3	4	4	3	4	3	3	4	4	3	3492.3	2618.8	2418.1	4209.3	4657.7	2518.4	30922	38508	36646	29174	40238	41409	0.855392	1.06524	1.01374	0.807037	1.1131
O14734	Acyl-coenzyme A thioesterase 8 OS=Homo sapiens OX=9606 GN=ACOT8 PE=1 SV=1	ACOT8	35.914	40.1	50	9	9	9	10	8	8	9	7	8	9	8	9	9	8	8	9	8	9	9	8	8	9	8	9	9	8	8	56099	39989	39039	62859	36642	34389	244780	182590	168040	279310	170250	155260	1.22367	0.912775	0.840039	1.39628	0.851087
O14735	CDP-diacylglycerol--inositol 3-phosphatidyltransferase OS=Homo sapiens OX=9606 GN=CDIPT PE=1 SV=1	CDIPT	23.539	22.5	20	4	4	4	3	3	3	4	4	3	4	3	3	4	4	4	4	3	3	4	4	4	4	3	3	4	4	4	57826	52827	42994	52986	48386	44290	373990	367760	270290	288160	274860	257130	1.22473	1.20433	0.885137	0.943658	0.900103
O14737	Programmed cell death protein 5 OS=Homo sapiens OX=9606 GN=PDCD5 PE=1 SV=3	PDCD5	14.285	36.8	17	4	4	4	3	2	2	3	3	4	3	3	3	3	3	4	3	3	3	3	3	4	3	3	3	3	3	4	83940	68867	70246	77589	77786	112600	356890	280180	307760	331380	320900	344780	1.10271	0.865693	0.950909	1.02389	0.991508
O14744	Protein arginine N-methyltransferase 5 OS=Homo sapiens OX=9606 GN=PRMT5 PE=1 SV=4	PRMT5	72.683	43.6	107	18	18	18	16	18	17	19	19	18	16	16	15	16	17	17	16	16	15	16	17	17	16	16	15	16	17	17	77339	69456	72251	77503	79827	70346	556280	527630	537370	550590	507490	526140	1.04123	0.987609	1.00584	1.03059	0.949911
O14745	Na(+)/H(+) exchange regulatory cofactor NHE-RF1 OS=Homo sapiens OX=9606 GN=SLC9A3R1 PE=1 SV=4	SLC9A3R1	38.868	27.1	46	8	8	8	7	8	8	8	8	7	8	7	8	8	8	6	8	7	8	8	8	6	8	7	8	8	8	6	57588	52180	59335	58348	51012	42865	301580	292220	316180	303200	267160	293460	1.02012	0.988454	1.0695	1.0256	0.903687
O14757	Serine/threonine-protein kinase Chk1 OS=Homo sapiens OX=9606 GN=CHEK1 PE=1 SV=2	CHEK1	54.433	5	3	2	2	2	0	1	0	0	1	1	0	2	1	0	1	2	0	2	1	0	1	2	0	2	1	0	1	2		2773.5	632.34		1311	2070	0	0	0	0	0	0
O14763	Tumor necrosis factor receptor superfamily member 10B OS=Homo sapiens OX=9606 GN=TNFRSF10B PE=1 SV=2	TNFRSF10B	47.878	8.2	7	2	2	2	2	1	1	1	1	1	2	1	1	2	1	1	2	1	1	2	1	1	2	1	1	2	1	1	2693.9	814.18	908.4	1679.2	1178.3	871.76	35573	0	0	19353	0	0	1.29531			0.704694
O14773	Tripeptidyl-peptidase 1 OS=Homo sapiens OX=9606 GN=TPP1 PE=1 SV=2	TPP1	61.247	34.8	65	11	11	11	13	8	10	13	9	12	11	9	10	10	10	10	11	9	10	10	10	10	11	9	10	10	10	10	100150	45300	41931	102780	57537	45226	585870	292940	252530	589440	316020	299070	1.50489	0.752456	0.648658	1.51406	0.81174
O14776	Transcription elongation regulator 1 OS=Homo sapiens OX=9606 GN=TCERG1 PE=1 SV=2	TCERG1	123.9	20.1	92	20	20	20	18	17	13	12	18	14	19	19	18	15	20	17	19	19	18	15	20	17	19	19	18	15	20	17	41264	37883	36299	36932	43952	41716	229220	210490	215840	228930	218870	230850	1.03082	0.94659	0.970649	1.02952	0.984275
O14777	Kinetochore protein NDC80 homolog OS=Homo sapiens OX=9606 GN=NDC80 PE=1 SV=1	NDC80	73.912	4	9	2	2	2	1	2	2	0	2	2	1	2	2	1	2	2	1	2	2	1	2	2	1	2	2	1	2	2	20951	23581	21670	24875	24470	24248	0	0	0	0	0	0
O14786	Neuropilin-1 OS=Homo sapiens OX=9606 GN=NRP1 PE=1 SV=3	NRP1	103.13	6.6	3	3	3	3	0	1	1	0	0	1	1	1	1	2	1	2	1	1	1	2	1	2	1	1	1	2	1	2	591.33	68.5	83.523	1951.7	509.69	718.46	0	0	0	0	0	0
O14787	Transportin-2 OS=Homo sapiens OX=9606 GN=TNPO2 PE=1 SV=3	TNPO2	101.39	34.7	91	23	18	18	15	20	13	16	15	12	19	21	17	19	21	20	14	16	12	16	16	15	14	16	12	16	16	15	33547	36218	29759	34400	36515	29189	232480	271770	229600	267450	294780	254140	0.899795	1.05186	0.888648	1.03514	1.14092
O14802	DNA-directed RNA polymerase III subunit RPC1 OS=Homo sapiens OX=9606 GN=POLR3A PE=1 SV=2	POLR3A	155.64	7.5	30	7	7	7	5	5	5	6	4	5	7	6	7	7	6	7	7	6	7	7	6	7	7	6	7	7	6	7	1229.5	958.21	978.29	1215.8	920.07	897.27	23114	19178	19437	23410	18028	17928	1.14525	0.950229	0.963062	1.15992	0.893249
O14818	Proteasome subunit alpha type-7 OS=Homo sapiens OX=9606 GN=PSMA7 PE=1 SV=1	PSMA7	27.887	59.3	79	12	12	12	12	12	14	13	14	14	12	11	12	12	11	12	12	11	12	12	11	12	12	11	12	12	11	12	323200	356220	342320	324850	360460	364900	952250	978750	949770	941870	1022200	1019800	0.974229	1.00134	0.971691	0.963609	1.04579
O14828	Secretory carrier-associated membrane protein 3 OS=Homo sapiens OX=9606 GN=SCAMP3 PE=1 SV=3	SCAMP3	38.287	27.7	22	5	5	5	5	3	3	4	2	5	3	4	3	4	3	5	3	4	3	4	3	5	3	4	3	4	3	5	82477	79248	73636	86823	73212	77070	321970	268170	297680	318920	278040	296580	1.08446	0.903254	1.00265	1.07419	0.936498
O14832	Phytanoyl-CoA dioxygenase, peroxisomal OS=Homo sapiens OX=9606 GN=PHYH PE=1 SV=1	PHYH	38.538	8.3	3	2	2	2	1	0	0	1	0	1	1	0	1	1	0	1	1	0	1	1	0	1	1	0	1	1	0	1	342.01		1173.3	270.59		862.34	0	0	0	0	0	0
O14841	5-oxoprolinase OS=Homo sapiens OX=9606 GN=OPLAH PE=1 SV=3	OPLAH	137.46	18.4	38	15	15	15	12	5	2	11	5	3	15	10	6	11	7	6	15	10	6	11	7	6	15	10	6	11	7	6	9056.6	3863.8	2110.1	7146.7	8029.1	1588.9	102870	60482	52373	115150	59822	51735	1.39506	0.820221	0.710252	1.5616	0.81127
O14874	[3-methyl-2-oxobutanoate dehydrogenase [lipoamide]] kinase, mitochondrial OS=Homo sapiens OX=9606 GN=BCKDK PE=1 SV=2	BCKDK	46.36	30.8	30	7	7	7	6	4	4	5	6	5	6	7	6	6	7	6	6	7	6	6	7	6	6	7	6	6	7	6	8832.9	10887	9551.8	8627.1	11728	11195	72338	84207	92142	67643	93631	103160	0.845859	0.984645	1.07743	0.79096	1.09484
O14879	Interferon-induced protein with tetratricopeptide repeats 3 OS=Homo sapiens OX=9606 GN=IFIT3 PE=1 SV=1	IFIT3	55.984	40.2	74	12	12	12	10	11	10	11	16	16	8	10	11	9	12	11	8	10	11	9	12	11	8	10	11	9	12	11	28285	118520	73452	58681	227670	102770	143260	584640	310220	232870	821160	400400	0.344852	1.40733	0.746753	0.560558	1.97667
O14880	Microsomal glutathione S-transferase 3 OS=Homo sapiens OX=9606 GN=MGST3 PE=1 SV=1	MGST3	16.516	32.9	31	4	4	4	5	5	6	5	5	5	4	4	4	4	4	4	4	4	4	4	4	4	4	4	4	4	4	4	326150	309770	319090	355360	320400	283440	1006600	879910	800400	1132400	997080	868510	1.06239	0.928681	0.844764	1.19517	1.05235
O14893	Gem-associated protein 2 OS=Homo sapiens OX=9606 GN=GEMIN2 PE=1 SV=1	GEMIN2	31.585	20.7	9	4	4	4	2	2	2	1	1	1	3	2	3	3	2	2	3	2	3	3	2	2	3	2	3	3	2	2	17182	8177	13481	15223	14252	13147	93481	94533	87019	94758	97515	98361	0.991548	1.00271	0.923006	1.00509	1.03434
O14896	Interferon regulatory factor 6 OS=Homo sapiens OX=9606 GN=IRF6 PE=1 SV=1	IRF6	53.129	27.6	44	10	10	10	8	9	6	9	7	5	9	10	8	9	9	8	9	10	8	9	9	8	9	10	8	9	9	8	44787	38609	32021	53358	39789	34749	244830	203050	179790	310390	212840	211000	1.07862	0.894559	0.792085	1.36746	0.93769
O14907	Tax1-binding protein 3 OS=Homo sapiens OX=9606 GN=TAX1BP3 PE=1 SV=2	TAX1BP3	13.735	28.2	9	2	2	2	2	2	2	0	1	2	2	2	2	1	2	2	2	2	2	1	2	2	2	2	2	1	2	2	160230	195810	176200	137300	187520	156970	706790	912480	905000	0	947100	847560	0.818247	1.05637	1.04771		1.09645
O14908	PDZ domain-containing protein GIPC1 OS=Homo sapiens OX=9606 GN=GIPC1 PE=1 SV=2	GIPC1	36.049	42.6	68	11	11	11	12	10	13	10	10	13	10	10	11	9	9	11	10	10	11	9	9	11	10	10	11	9	9	11	97406	118310	139460	98007	108900	113960	300920	340440	341270	308110	317900	319760	0.936279	1.05924	1.06182	0.95865	0.98911
O14925	Mitochondrial import inner membrane translocase subunit Tim23 OS=Homo sapiens OX=9606 GN=TIMM23 PE=1 SV=1	TIMM23	21.943	22.5	14	3	3	3	2	3	3	1	3	2	3	3	3	2	3	3	3	3	3	2	3	3	3	3	3	2	3	3	50972	60997	55424	19345	65370	56653	234540	279910	278940	224820	309420	284360	0.872983	1.04185	1.03825	0.836804	1.15169
O14929	Histone acetyltransferase type B catalytic subunit OS=Homo sapiens OX=9606 GN=HAT1 PE=1 SV=1	HAT1	49.512	27.2	25	8	8	8	3	5	4	3	4	6	6	7	7	8	8	7	6	7	7	8	8	7	6	7	7	8	8	7	37603	67174	63639	42849	78899	65714	186110	309390	303820	190190	356340	339180	0.662694	1.10167	1.08183	0.677222	1.26884
O14933	Ubiquitin/ISG15-conjugating enzyme E2 L6 OS=Homo sapiens OX=9606 GN=UBE2L6 PE=1 SV=4	UBE2L6	17.769	56.2	19	4	4	4	2	5	2	2	4	4	1	4	1	1	3	3	1	4	1	1	3	3	1	4	1	1	3	3	14358	37356	17079	15593	46736	21426	78540	174230	99955	72365	278910	98540	0.587186	1.30259	0.74729	0.54102	2.0852
O14936	Peripheral plasma membrane protein CASK OS=Homo sapiens OX=9606 GN=CASK PE=1 SV=3	CASK	105.12	34.4	139	27	27	27	26	22	18	30	22	21	23	24	23	26	25	23	23	24	23	26	25	23	23	24	23	26	25	23	60941	58826	55072	53074	46425	55180	735620	626250	617090	816330	601050	623440	1.098	0.934753	0.92108	1.21847	0.897139
O14939	Phospholipase D2 OS=Homo sapiens OX=9606 GN=PLD2 PE=1 SV=2	PLD2	105.99	8.1	17	5	5	5	3	2	3	4	3	2	3	4	4	4	4	2	3	4	4	4	4	2	3	4	4	4	4	2	833.69	1113.8	1042.5	1613.1	878.04	507.68	21970	17587	16371	24619	15176	15437	1.18586	0.94928	0.883645	1.32884	0.819144
O14949	Cytochrome b-c1 complex subunit 8 OS=Homo sapiens OX=9606 GN=UQCRQ PE=1 SV=4	UQCRQ	9.9062	25.6	5	2	2	2	1	1	0	2	1	0	2	2	1	2	2	0	2	2	1	2	2	0	2	2	1	2	2	0	37127	25947	2520.9	33724	29786		204630	67777	0	186450	180300	0	1.28062	0.424165		1.16685	1.12836
P19105	Myosin regulatory light chain 12A OS=Homo sapiens OX=9606 GN=MYL12A PE=1 SV=2	MYL12A	19.794	62.6	87	9	3	9	17	16	14	13	13	14	8	8	8	9	9	8	3	3	3	3	3	3	8	8	8	9	9	8	1453500	1527600	1446800	1440400	1624900	1506100	2597000	2460800	2588700	2374000	2559000	2789500	1.01386	0.960687	1.01062	0.926801	0.999024
O14964	Hepatocyte growth factor-regulated tyrosine kinase substrate OS=Homo sapiens OX=9606 GN=HGS PE=1 SV=1	HGS	86.191	23.9	61	13	13	13	10	11	13	9	6	12	11	12	13	10	9	12	11	12	13	10	9	12	11	12	13	10	9	12	31147	33748	35592	28247	48120	34680	251230	223690	258210	240190	211220	247080	1.05292	0.937497	1.08217	1.00665	0.885235
O14965	Aurora kinase A OS=Homo sapiens OX=9606 GN=AURKA PE=1 SV=2	AURKA	45.809	18.4	12	6	5	6	0	4	2	0	4	2	0	5	3	0	4	4	0	4	3	0	4	4	0	5	3	0	4	4		3935.1	2599.1		4672.2	2767.9	0	50438	32547	0	43985	26141		1.31768	0.850285		1.1491
O14972	Vacuolar protein sorting-associated protein 26C OS=Homo sapiens OX=9606 GN=VPS26C PE=1 SV=1	VPS26C	33.01	8.1	4	2	2	2	0	2	1	0	1	0	2	2	2	2	2	2	2	2	2	2	2	2	2	2	2	2	2	2	938.01	1689.7	1036.6	1308	1854.8	1302.1	9752.7	16047	10380	11679	13567	11854	0.798532	1.3139	0.849894	0.956254	1.11084
O14974	Protein phosphatase 1 regulatory subunit 12A OS=Homo sapiens OX=9606 GN=PPP1R12A PE=1 SV=1	PPP1R12A	115.28	20.7	76	16	16	16	13	11	13	14	14	11	16	16	16	15	16	15	16	16	16	15	16	15	16	16	16	15	16	15	31552	34812	31614	33304	35618	28867	237750	242620	248200	235450	242850	255200	0.975671	0.995657	1.01856	0.966233	0.996601
O14976	Cyclin-G-associated kinase OS=Homo sapiens OX=9606 GN=GAK PE=1 SV=2	GAK	143.19	12.4	45	11	11	11	8	8	7	7	9	6	8	8	8	10	9	9	8	8	8	10	9	9	8	8	8	10	9	9	3887.3	6113.5	6611.9	3897.7	6843.2	6911	52509	74654	73183	49328	76044	69259	0.797652	1.13405	1.1117	0.74933	1.15517
O14979	Heterogeneous nuclear ribonucleoprotein D-like OS=Homo sapiens OX=9606 GN=HNRNPDL PE=1 SV=3	HNRNPDL	46.437	19	44	9	8	9	8	7	6	8	8	7	9	9	9	9	9	9	8	8	8	8	8	8	9	9	9	9	9	9	224850	257960	236830	240050	253800	230480	1699000	1859200	1822600	1807200	1861900	1831700	0.936811	1.02514	1.00496	0.996471	1.02663
O14980	Exportin-1 OS=Homo sapiens OX=9606 GN=XPO1 PE=1 SV=1	XPO1	123.38	50.3	264	39	39	39	44	46	42	41	45	46	37	37	37	36	36	35	37	37	37	36	36	35	37	37	37	36	36	35	186440	205100	174240	183240	194730	168120	750380	791010	746060	780300	742610	725470	0.992603	1.04635	0.986889	1.03218	0.982325
O14981	TATA-binding protein-associated factor 172 OS=Homo sapiens OX=9606 GN=BTAF1 PE=1 SV=2	BTAF1	206.89	10.8	51	15	15	15	5	9	9	9	11	8	11	13	11	10	15	12	11	13	11	10	15	12	11	13	11	10	15	12	3114.9	4543.2	3409.1	3422.7	5065	3658.4	37943	44701	39652	42308	42724	40536	0.918479	1.08207	0.959849	1.02414	1.03421
O15013	Rho guanine nucleotide exchange factor 10 OS=Homo sapiens OX=9606 GN=ARHGEF10 PE=1 SV=4	ARHGEF10	151.61	9	41	8	8	8	8	7	7	6	7	6	8	8	8	8	8	8	8	8	8	8	8	8	8	8	8	8	8	8	4541.7	4539.3	4824	3632.4	4742.9	4527.3	48614	48491	53596	39111	48991	52314	1.00195	0.999413	1.10463	0.806088	1.00972
O15014	Zinc finger protein 609 OS=Homo sapiens OX=9606 GN=ZNF609 PE=1 SV=2	ZNF609	151.19	3.8	8	3	3	3	1	1	1	1	3	1	1	1	1	2	3	1	1	1	1	2	3	1	1	1	1	2	3	1	163.2	174.07	229.09	388.29	540.54	132.41	0	0	0	11479	13266	0				0.927783	1.07222
O15020	Spectrin beta chain, non-erythrocytic 2 OS=Homo sapiens OX=9606 GN=SPTBN2 PE=1 SV=3	SPTBN2	271.32	9	13	18	9	9	5	0	0	6	2	0	16	12	14	17	16	15	8	4	5	8	7	7	8	4	5	8	7	7	960.02	319.88	457.59	1340.5	451.85	465.94	30143	14184	14162	42392	15758	13583	1.38884	0.65353	0.652516	1.95322	0.726052
O15027	Protein transport protein Sec16A OS=Homo sapiens OX=9606 GN=SEC16A PE=1 SV=4	SEC16A	251.89	22.1	88	30	30	30	17	14	11	17	11	18	28	24	22	24	22	22	28	24	22	24	22	22	28	24	22	24	22	22	17283	13888	12102	16461	13266	12927	151920	143200	134460	153150	144190	144820	1.04563	0.985615	0.925459	1.0541	0.992429
O15031	Plexin-B2 OS=Homo sapiens OX=9606 GN=PLXNB2 PE=1 SV=3	PLXNB2	205.12	21.5	117	26	26	26	18	18	17	23	22	19	24	22	22	24	24	24	24	22	22	24	24	24	24	22	22	24	24	24	17718	15757	13002	22072	18233	17582	150900	139460	133570	198730	155570	156760	0.968353	0.89494	0.857143	1.27529	0.998321
O15042	U2 snRNP-associated SURP motif-containing protein OS=Homo sapiens OX=9606 GN=U2SURP PE=1 SV=2	U2SURP	118.29	18.2	75	14	14	14	12	14	11	14	13	11	13	14	14	14	12	14	13	14	14	14	12	14	13	14	14	14	12	14	42543	49209	44868	45356	39505	45628	316460	330450	326530	318030	340360	336420	0.964695	1.00734	0.995392	0.969481	1.03755
O15047	Histone-lysine N-methyltransferase SETD1A OS=Homo sapiens OX=9606 GN=SETD1A PE=1 SV=3	SETD1A	186.03	0.6	3	1	1	1	0	1	0	1	0	1	1	1	1	1	1	1	1	1	1	1	1	1	1	1	1	1	1	1	241.55	260.9	184.27	233.55	127.45	241.06	0	0	0	0	0	0
O15056	Synaptojanin-2 OS=Homo sapiens OX=9606 GN=SYNJ2 PE=1 SV=3	SYNJ2	165.54	4.9	6	4	4	4	1	2	1	1	0	1	2	2	4	2	2	3	2	2	4	2	2	3	2	2	4	2	2	3	595.97	151.85	689.38	556.54	436.63	643.28	19845	21972	18729	19527	0	20657	0.985059	1.09064	0.929663	0.969274
O15066	Kinesin-like protein KIF3B OS=Homo sapiens OX=9606 GN=KIF3B PE=1 SV=1	KIF3B	85.124	17.5	50	10	9	10	9	8	8	9	7	9	10	9	9	9	9	10	9	8	8	8	8	9	10	9	9	9	9	10	9802.7	9713.1	10634	10632	9224.2	9173.9	82459	78633	78709	88477	73478	76538	1.03441	0.986418	0.987372	1.10991	0.921751
O15067	Phosphoribosylformylglycinamidine synthase OS=Homo sapiens OX=9606 GN=PFAS PE=1 SV=4	PFAS	144.73	30.3	169	29	29	29	27	27	28	28	28	31	28	27	28	27	27	28	28	27	28	27	27	28	28	27	28	27	27	28	83584	83386	90584	80251	82104	83232	634570	571430	659760	615670	585620	622120	1.03205	0.929364	1.07302	1.00131	0.952442
O15084	Serine/threonine-protein phosphatase 6 regulatory ankyrin repeat subunit A OS=Homo sapiens OX=9606 GN=ANKRD28 PE=1 SV=5	ANKRD28	112.96	14.3	45	10	10	10	8	7	8	7	9	6	9	8	9	10	9	8	9	8	9	10	9	8	9	8	9	10	9	8	8868.5	9023.3	8516.4	11945	9913.8	7042.7	91584	87986	85804	102370	93535	99528	0.979845	0.941351	0.918006	1.09524	1.00072
O15085	Rho guanine nucleotide exchange factor 11 OS=Homo sapiens OX=9606 GN=ARHGEF11 PE=1 SV=1	ARHGEF11	167.7	2.5	6	3	3	3	1	1	2	2	0	0	2	1	2	2	2	1	2	1	2	2	2	1	2	1	2	2	2	1	585.32	429.95	474.39	189	389.9	253.28	0	0	0	0	0	0
O15091	Mitochondrial ribonuclease P catalytic subunit OS=Homo sapiens OX=9606 GN=PRORP PE=1 SV=2	PRORP	67.315	16.8	27	6	6	6	3	5	5	5	4	5	6	6	6	6	6	6	6	6	6	6	6	6	6	6	6	6	6	6	6069.6	7673.6	7317.9	5862.5	7995.4	7868.9	74260	96951	102570	76864	108970	91703	0.808172	1.05512	1.11627	0.836512	1.18592
O15111	Inhibitor of nuclear factor kappa-B kinase subunit alpha OS=Homo sapiens OX=9606 GN=CHUK PE=1 SV=2	CHUK	84.639	17.7	45	11	11	11	8	8	7	10	7	5	11	11	10	10	11	10	11	11	10	10	11	10	11	11	10	10	11	10	9976.5	9025	8676.2	9522.7	8049.7	7760.9	84468	74609	78808	85405	64832	69837	1.10667	0.977498	1.03251	1.11894	0.849404
O15116	U6 snRNA-associated Sm-like protein LSm1 OS=Homo sapiens OX=9606 GN=LSM1 PE=1 SV=1	LSM1	15.179	24.8	6	2	1	2	1	1	1	1	1	1	2	2	2	2	1	2	1	1	1	1	1	1	2	2	2	2	1	2	22483	21704	20508	25383	16609	20930	0	0	0	0	0	0
O15118	NPC intracellular cholesterol transporter 1 OS=Homo sapiens OX=9606 GN=NPC1 PE=1 SV=2	NPC1	142.17	13.8	58	11	11	11	10	10	9	6	11	12	10	10	10	10	10	10	10	10	10	10	10	10	10	10	10	10	10	10	43061	42894	48759	32483	41541	40778	592130	614190	693900	432590	529840	568870	1.03534	1.07391	1.21328	0.756382	0.926423
O15121	Sphingolipid delta(4)-desaturase DES1 OS=Homo sapiens OX=9606 GN=DEGS1 PE=1 SV=1	DEGS1	37.866	14.9	23	3	3	3	4	4	4	3	5	3	3	3	3	3	3	3	3	3	3	3	3	3	3	3	3	3	3	3	34142	50573	45025	31773	52705	46555	143900	234010	198000	136590	221100	203780	0.759113	1.23447	1.04451	0.720551	1.16637
O15126	Secretory carrier-associated membrane protein 1 OS=Homo sapiens OX=9606 GN=SCAMP1 PE=1 SV=2	SCAMP1	37.92	19.2	19	4	4	4	4	3	2	4	3	3	3	4	4	4	4	3	3	4	4	4	4	3	3	4	4	4	4	3	28695	21983	22809	28590	24627	21739	152480	95019	119580	148500	120960	137980	1.18122	0.736088	0.926356	1.15039	0.937046
O15127	Secretory carrier-associated membrane protein 2 OS=Homo sapiens OX=9606 GN=SCAMP2 PE=1 SV=2	SCAMP2	36.648	9.7	12	2	2	2	2	2	2	2	2	2	2	2	2	2	2	2	2	2	2	2	2	2	2	2	2	2	2	2	106160	103210	93534	107430	99918	86262	529980	491320	477450	538320	472430	460490	1.07067	0.992569	0.964549	1.08752	0.954407
O15143	Actin-related protein 2/3 complex subunit 1B OS=Homo sapiens OX=9606 GN=ARPC1B PE=1 SV=3	ARPC1B	40.949	46.5	86	12	11	12	13	14	16	13	16	14	10	12	12	10	11	12	9	11	11	9	10	11	10	12	12	10	11	12	288590	306860	283450	283100	303890	288560	1227300	1193100	1239900	1210400	1190900	1209500	1.01275	0.984528	1.02315	0.998803	0.982712
O15144	Actin-related protein 2/3 complex subunit 2 OS=Homo sapiens OX=9606 GN=ARPC2 PE=1 SV=1	ARPC2	34.333	27.3	46	8	8	8	8	8	7	8	8	7	8	8	8	8	8	7	8	8	8	8	8	7	8	8	8	8	8	7	280830	289170	271460	277410	275620	261490	1337100	1330500	1341300	1356700	1275700	1371100	1.00127	0.996331	1.00442	1.01595	0.955294
O15145	Actin-related protein 2/3 complex subunit 3 OS=Homo sapiens OX=9606 GN=ARPC3 PE=1 SV=3	ARPC3	20.546	30.9	35	5	5	5	6	6	6	6	5	6	5	5	5	5	5	5	5	5	5	5	5	5	5	5	5	5	5	5	270390	282380	281940	281780	209480	275840	776840	739890	788510	778180	731180	778540	1.01478	0.966515	1.03003	1.01653	0.955137
O15155	BET1 homolog OS=Homo sapiens OX=9606 GN=BET1 PE=1 SV=1	BET1	13.289	24.6	12	2	2	2	2	2	2	2	2	2	2	2	2	2	2	2	2	2	2	2	2	2	2	2	2	2	2	2	236610	206840	181790	202070	202510	180630	440460	364000	351300	380020	355290	359540	1.17424	0.970404	0.936546	1.01311	0.947183
O15156	Zinc finger and BTB domain-containing protein 7B OS=Homo sapiens OX=9606 GN=ZBTB7B PE=1 SV=2	ZBTB7B	58.026	18.9	26	7	7	7	3	5	5	4	4	5	4	7	6	6	5	5	4	7	6	6	5	5	4	7	6	6	5	5	5074	8985	6078.4	8735	8011.9	6319.9	23257	31251	24267	36353	31227	27036	0.804782	1.08141	0.839732	1.25795	1.08058
O15160	DNA-directed RNA polymerases I and III subunit RPAC1 OS=Homo sapiens OX=9606 GN=POLR1C PE=1 SV=1	POLR1C	39.249	39.3	36	8	8	8	6	5	6	5	7	7	7	7	7	6	6	7	7	7	7	6	6	7	7	7	7	6	6	7	18964	20856	19492	18363	21725	20809	76667	81698	83960	76093	86973	86733	0.934728	0.996066	1.02364	0.92773	1.06038
O15162	Phospholipid scramblase 1 OS=Homo sapiens OX=9606 GN=PLSCR1 PE=1 SV=1	PLSCR1	35.049	11.6	13	3	3	3	2	3	2	2	2	2	3	3	3	3	3	3	3	3	3	3	3	3	3	3	3	3	3	3	33143	61434	39342	41969	74098	48093	182960	310560	214890	228830	380930	271370	0.690615	1.17226	0.81114	0.863759	1.43789
O15164	Transcription intermediary factor 1-alpha OS=Homo sapiens OX=9606 GN=TRIM24 PE=1 SV=3	TRIM24	116.83	17.2	51	13	12	13	5	10	8	7	10	11	7	11	11	8	10	12	7	11	11	8	9	12	7	11	11	8	10	12	2863.1	6530.7	5635.9	2957.6	7627.9	6172.6	41777	78990	76987	42667	77954	81532	0.626801	1.18513	1.15507	0.640154	1.16958
O15173	Membrane-associated progesterone receptor component 2 OS=Homo sapiens OX=9606 GN=PGRMC2 PE=1 SV=1	PGRMC2	23.818	42.2	18	6	5	6	4	3	2	5	2	2	5	5	4	6	4	5	4	5	4	5	4	4	5	5	4	6	4	5	108130	111460	66219	144690	79492	85173	588740	483520	464620	558380	539520	387220	1.16891	0.96	0.922475	1.10863	1.07119
O15182	Centrin-3 OS=Homo sapiens OX=9606 GN=CETN3 PE=1 SV=2	CETN3	19.55	19.2	11	2	2	2	2	1	2	2	2	2	2	2	2	2	2	2	2	2	2	2	2	2	2	2	2	2	2	2	6700.5	6351.2	6352.7	5905.3	7028.8	6636.1	51545	49179	51696	48189	52482	55831	1.00113	0.955173	1.00406	0.935945	1.01933
O15211	Ral guanine nucleotide dissociation stimulator-like 2 OS=Homo sapiens OX=9606 GN=RGL2 PE=1 SV=1	RGL2	83.548	3.3	2	2	2	2	0	0	0	2	0	0	0	0	0	2	0	0	0	0	0	2	0	0	0	0	0	2	0	0				1013.7			0	0	0	0	0	0
O15212	Prefoldin subunit 6 OS=Homo sapiens OX=9606 GN=PFDN6 PE=1 SV=1	PFDN6	14.582	43.4	31	6	6	6	5	6	5	5	4	6	6	6	6	6	6	6	6	6	6	6	6	6	6	6	6	6	6	6	261010	246290	242050	215440	243170	238640	659140	620940	646940	567560	613940	643670	1.05401	0.992924	1.0345	0.907566	0.981731
O15213	WD repeat-containing protein 46 OS=Homo sapiens OX=9606 GN=WDR46 PE=1 SV=3	WDR46	68.07	16.9	43	7	7	7	6	8	8	7	8	6	6	5	7	6	6	5	6	5	7	6	6	5	6	5	7	6	6	5	12889	11310	11790	12730	12253	9336.9	79248	70519	79533	86743	75116	70923	1.02901	0.915669	1.03271	1.12633	0.975359
O15217	Glutathione S-transferase A4 OS=Homo sapiens OX=9606 GN=GSTA4 PE=1 SV=1	GSTA4	25.704	4.1	6	1	1	1	1	1	1	1	1	1	1	1	1	1	1	1	1	1	1	1	1	1	1	1	1	1	1	1	14544	15489	14366	16030	15789	16638	0	0	0	0	0	0
O15226	NF-kappa-B-repressing factor OS=Homo sapiens OX=9606 GN=NKRF PE=1 SV=2	NKRF	77.672	15.4	38	8	8	8	5	7	7	6	6	7	8	8	8	8	8	8	8	8	8	8	8	8	8	8	8	8	8	8	13354	15072	14262	14872	14826	14245	112410	116230	116800	125060	116690	118640	0.955556	0.988028	0.992874	1.06309	0.991939
O15228	Dihydroxyacetone phosphate acyltransferase OS=Homo sapiens OX=9606 GN=GNPAT PE=1 SV=1	GNPAT	77.187	23.8	41	11	11	11	9	7	6	7	5	7	9	9	9	7	9	10	9	9	9	7	9	10	9	9	9	7	9	10	9449.7	7379.9	7389.6	6374.1	8852.4	7669.8	72234	65987	73178	74385	70633	72662	1.01008	0.922725	1.02328	1.04016	0.987692
O15230	Laminin subunit alpha-5 OS=Homo sapiens OX=9606 GN=LAMA5 PE=1 SV=8	LAMA5	399.73	2.1	9	6	5	6	0	0	0	6	2	1	3	2	2	6	3	2	3	2	2	5	3	2	3	2	2	6	3	2	264.12	163.92	64.044	421.03	220.63	170.8	14008	15957	11424	32799	16825	17179	0.776841	0.884927	0.63354	1.81893	0.933063
O15231	Zinc finger protein 185 OS=Homo sapiens OX=9606 GN=ZNF185 PE=1 SV=3	ZNF185	73.525	48.5	106	21	21	21	18	19	18	16	14	21	19	18	19	17	19	19	19	18	19	17	19	19	19	18	19	17	19	19	72439	68232	64633	59318	61262	60705	280710	285690	293600	272480	250560	279310	1.01318	1.03116	1.0597	0.983475	0.904358
O15235	28S ribosomal protein S12, mitochondrial OS=Homo sapiens OX=9606 GN=MRPS12 PE=1 SV=1	MRPS12	15.173	18.1	6	1	1	1	1	1	1	1	1	1	1	1	1	1	1	1	1	1	1	1	1	1	1	1	1	1	1	1	11630	12851	12339	10864	11358	12162	0	0	0	0	0	0
O15239	NADH dehydrogenase [ubiquinone] 1 alpha subcomplex subunit 1 OS=Homo sapiens OX=9606 GN=NDUFA1 PE=1 SV=1	NDUFA1	8.0723	18.6	9	1	1	1	1	2	2	2	1	1	1	1	1	1	1	1	1	1	1	1	1	1	1	1	1	1	1	1	72105	63269	57594	68861	55188	57694	73665	64515	63224	73731	58692	65256
O15243	Leptin receptor gene-related protein OS=Homo sapiens OX=9606 GN=LEPROT PE=1 SV=1	LEPROT	14.254	9.9	6	1	1	1	1	1	1	1	1	1	1	1	1	1	1	1	1	1	1	1	1	1	1	1	1	1	1	1	16370	12135	11858	14195	12335	11288	0	0	0	0	0	0
O15247	Chloride intracellular channel protein 2 OS=Homo sapiens OX=9606 GN=CLIC2 PE=1 SV=3	CLIC2	28.356	21.5	7	3	3	3	1	2	2	0	1	1	1	2	2	0	2	2	1	2	2	0	2	2	1	2	2	0	2	2	766.81	1572.5	1048		1544.5	1911	0	13897	9826.3	0	14122	0		1.10162	0.778932		1.11945
O15254	Peroxisomal acyl-coenzyme A oxidase 3 OS=Homo sapiens OX=9606 GN=ACOX3 PE=1 SV=2	ACOX3	77.628	9.1	11	4	4	4	1	2	2	2	2	2	2	2	4	2	4	2	2	2	4	2	4	2	2	2	4	2	4	2	1346.2	1340.6	1545.6	1348.9	1950	898.43	31043	27262	20321	43333	24141	21975	1.10818	0.973208	0.725426	1.54692	0.861794
O15258	Protein RER1 OS=Homo sapiens OX=9606 GN=RER1 PE=1 SV=1	RER1	22.958	23	22	4	4	4	4	4	2	4	4	4	4	4	4	4	4	3	4	4	4	4	4	3	4	4	4	4	4	3	132460	99041	95109	109870	84686	80409	484720	336110	351560	402230	357390	361350	1.26815	0.879347	0.919768	1.05233	0.935021
O15260	Surfeit locus protein 4 OS=Homo sapiens OX=9606 GN=SURF4 PE=1 SV=3	SURF4	30.394	24.5	38	5	5	5	6	6	7	5	7	7	5	5	5	5	5	5	5	5	5	5	5	5	5	5	5	5	5	5	218270	206740	182390	181730	197930	182390	1144000	1057600	962790	929000	987320	953700	1.13748	1.05157	0.9573	0.923703	0.98169
O15264	Mitogen-activated protein kinase 13 OS=Homo sapiens OX=9606 GN=MAPK13 PE=1 SV=1	MAPK13	42.089	30.4	22	6	6	6	5	5	2	4	4	2	4	5	5	5	5	3	4	5	5	5	5	3	4	5	5	5	5	3	10632	12157	12517	12589	11751	7795	106710	117100	99367	101220	105940	82694	1.04442	1.14611	0.972548	0.990684	1.03688
O15269	Serine palmitoyltransferase 1 OS=Homo sapiens OX=9606 GN=SPTLC1 PE=1 SV=1	SPTLC1	52.743	26.8	53	10	10	10	8	7	9	10	8	11	8	8	8	7	9	9	8	8	8	7	9	9	8	8	8	7	9	9	68734	61449	65189	66162	62145	71178	351250	345610	343810	350810	341800	370620	1.00171	0.985627	0.980493	1.00046	0.974761
O15270	Serine palmitoyltransferase 2 OS=Homo sapiens OX=9606 GN=SPTLC2 PE=1 SV=1	SPTLC2	62.924	35.8	71	14	14	14	12	13	13	10	11	12	13	12	13	12	12	11	13	12	13	12	12	11	13	12	13	12	12	11	36381	38974	41508	41859	39680	35854	335420	353650	365320	330570	360970	360130	0.955585	1.00752	1.04077	0.941768	1.02838
O15294	UDP-N-acetylglucosamine--peptide N-acetylglucosaminyltransferase 110 kDa subunit OS=Homo sapiens OX=9606 GN=OGT PE=1 SV=3	OGT	116.92	27.7	70	19	19	19	9	16	11	9	11	14	12	17	14	13	17	16	12	17	14	13	17	16	12	17	14	13	17	16	8385.3	15033	11975	10285	17679	16264	97078	160210	139380	99740	169670	176240	0.691506	1.14121	0.992832	0.710468	1.20859
O15305	Phosphomannomutase 2 OS=Homo sapiens OX=9606 GN=PMM2 PE=1 SV=1	PMM2	28.082	42.7	25	7	6	7	4	3	6	3	5	4	5	5	5	4	5	5	5	5	5	4	5	5	5	5	5	4	5	5	49229	46382	57299	37867	55823	44680	262920	282840	283880	237850	264880	266800	0.986462	1.0612	1.0651	0.8924	0.993816
O15321	Transmembrane 9 superfamily member 1 OS=Homo sapiens OX=9606 GN=TM9SF1 PE=2 SV=2	TM9SF1	68.86	14.4	25	6	6	6	4	3	4	4	6	4	5	6	6	5	6	5	5	6	6	5	6	5	5	6	6	5	6	5	8660.2	11426	9375.6	9154.2	12568	10364	72643	79607	63558	76211	82235	78464	0.962758	1.05505	0.842352	1.01005	1.08988
O15327	Inositol polyphosphate 4-phosphatase type II OS=Homo sapiens OX=9606 GN=INPP4B PE=1 SV=4	INPP4B	104.74	20.3	47	12	12	12	7	9	9	7	9	6	9	11	11	11	11	9	9	11	11	11	11	9	9	11	11	11	11	9	4533.4	7793.4	5382.3	4869.1	6360.7	4200.2	55746	73368	57550	49169	69673	56415	0.924169	1.21631	0.954076	0.815134	1.15505
O15344	E3 ubiquitin-protein ligase Midline-1 OS=Homo sapiens OX=9606 GN=MID1 PE=1 SV=1	MID1	75.25	13	29	7	7	7	3	3	7	4	4	8	7	7	7	7	7	7	7	7	7	7	7	7	7	7	7	7	7	7	11250	11383	11672	10350	10983	10479	101210	94632	102020	93641	88837	93948	1.05741	0.988689	1.06588	0.978335	0.928144
O15347	High mobility group protein B3 OS=Homo sapiens OX=9606 GN=HMGB3 PE=1 SV=4	HMGB3	22.98	21.5	9	4	4	4	3	1	1	1	1	2	3	3	4	3	3	3	3	3	4	3	3	3	3	3	4	3	3	3	48124	55797	48745	71361	33824	25508	148750	140980	173470	233430	87376	123830	0.983107	0.931754	1.14648	1.54277	0.577479
O15355	Protein phosphatase 1G OS=Homo sapiens OX=9606 GN=PPM1G PE=1 SV=1	PPM1G	59.271	45.6	93	16	16	16	15	18	16	14	17	13	14	15	14	13	15	14	14	15	14	13	15	14	14	15	14	13	15	14	209850	238860	221030	170970	216270	183820	960270	980130	1022500	906890	921460	890800	1.014	1.03497	1.07972	0.957637	0.973022
O15357	Phosphatidylinositol 3,4,5-trisphosphate 5-phosphatase 2 OS=Homo sapiens OX=9606 GN=INPPL1 PE=1 SV=2	INPPL1	138.6	14.1	41	12	12	12	9	7	7	7	5	6	10	10	11	10	9	10	10	10	11	10	9	10	10	10	11	10	9	10	4340.4	3606.1	4683.3	5225.6	3024.5	4328.4	67289	49756	56953	68449	47982	57612	1.16002	0.857761	0.981833	1.18002	0.827178
O15371	Eukaryotic translation initiation factor 3 subunit D OS=Homo sapiens OX=9606 GN=EIF3D PE=1 SV=1	EIF3D	63.972	53.5	108	17	17	17	16	18	19	18	19	18	16	17	17	17	17	17	16	17	17	17	17	17	16	17	17	17	17	17	160990	152340	184110	146780	166470	164060	680310	690130	701920	598870	670780	628190	1.02812	1.04296	1.06078	0.905048	1.01372
O15372	Eukaryotic translation initiation factor 3 subunit H OS=Homo sapiens OX=9606 GN=EIF3H PE=1 SV=1	EIF3H	39.93	72.2	118	17	17	17	20	19	21	21	17	20	17	16	15	17	15	15	17	16	15	17	15	15	17	16	15	17	15	15	173380	181340	178370	166440	167960	162840	439700	447790	465860	402700	429230	438370	1.00555	1.02405	1.06537	0.920931	0.981602
O15374	Monocarboxylate transporter 5 OS=Homo sapiens OX=9606 GN=SLC16A4 PE=1 SV=1	SLC16A4	54.021	5.5	2	1	1	1	1	0	0	1	0	0	1	0	0	1	0	0	1	0	0	1	0	0	1	0	0	1	0	0	637.37			1001			0	0	0	0	0	0
O15379	Histone deacetylase 3 OS=Homo sapiens OX=9606 GN=HDAC3 PE=1 SV=2	HDAC3	48.847	29.7	20	8	7	7	2	3	5	3	2	5	8	8	8	7	8	8	7	7	7	6	7	7	7	7	7	6	7	7	7426.9	14043	12715	6952.5	14290	12241	110080	118550	124900	121420	134350	151980	0.867591	0.934347	0.984395	0.956967	1.05888
O15381	Nuclear valosin-containing protein-like OS=Homo sapiens OX=9606 GN=NVL PE=1 SV=1	NVL	95.05	7.8	7	5	5	5	0	1	1	0	4	1	1	4	4	2	4	4	1	4	4	2	4	4	1	4	4	2	4	4	436.65	3782.7	3181.6	693.19	1751	3250.8	0	60043	51728	0	55581	54373		1.0832	0.933192		1.0027
O15382	Branched-chain-amino-acid aminotransferase, mitochondrial OS=Homo sapiens OX=9606 GN=BCAT2 PE=1 SV=2	BCAT2	44.287	35.7	40	10	10	10	7	5	3	11	7	7	7	8	5	9	8	8	7	8	5	9	8	8	7	8	5	9	8	8	14236	13774	5965.5	21580	16247	26795	108660	98148	85269	144730	117360	97789	1.00001	0.903263	0.784737	1.33196	1.08007
O15397	Importin-8 OS=Homo sapiens OX=9606 GN=IPO8 PE=1 SV=2	IPO8	119.94	16.2	41	14	13	13	6	10	7	7	6	5	10	13	9	9	10	10	9	12	8	8	9	9	9	12	8	8	9	9	13468	9896.2	8590.8	7158.9	7379	8518.2	113360	114650	121220	100390	105410	104150	1.03183	1.04357	1.10337	0.913772	0.959465
O15400	Syntaxin-7 OS=Homo sapiens OX=9606 GN=STX7 PE=1 SV=4	STX7	29.815	31.4	20	5	4	5	3	4	4	3	3	3	4	4	4	4	4	5	4	4	4	4	4	4	4	4	4	4	4	5	25101	20759	21935	21706	22467	32934	137620	99321	119430	118520	114850	124940	1.15537	0.833835	1.00266	0.995017	0.964206
O15427	Monocarboxylate transporter 4 OS=Homo sapiens OX=9606 GN=SLC16A3 PE=1 SV=1	SLC16A3	49.469	20.4	40	7	7	7	7	6	6	7	7	7	6	7	6	7	7	5	6	7	6	7	7	5	6	7	6	7	7	5	107820	104240	90581	102600	106890	87955	476310	477270	493520	494660	532110	608880	0.927049	0.928917	0.960545	0.962764	1.03565
O15438	ATP-binding cassette sub-family C member 3 OS=Homo sapiens OX=9606 GN=ABCC3 PE=1 SV=3	ABCC3	169.34	11.3	30	12	11	11	5	4	1	10	5	5	9	6	5	11	10	9	8	5	4	10	9	8	8	5	4	10	9	8	4084.9	1405.6	555.7	6268.1	2928.7	2014.8	47542	23246	14237	62182	29790	22678	1.42858	0.698515	0.427805	1.8685	0.895155
O15439	ATP-binding cassette sub-family C member 4 OS=Homo sapiens OX=9606 GN=ABCC4 PE=1 SV=3	ABCC4	149.52	2.7	11	2	2	2	2	2	2	2	1	2	2	2	2	2	1	2	2	2	2	2	1	2	2	2	2	2	1	2	748.04	515.31	556.86	741.84	374.76	502.02	39631	26298	30174	39836	0	27654	1.21127	0.803763	0.922228	1.21753
O15446	DNA-directed RNA polymerase I subunit RPA34 OS=Homo sapiens OX=9606 GN=POLR1G PE=1 SV=1	POLR1G	54.985	23.3	20	5	5	5	4	4	5	2	2	3	5	5	5	4	5	4	5	5	5	4	5	4	5	5	5	4	5	4	9725.7	8185.9	8502.2	5444.2	8383.8	6428.8	84795	66846	70050	60638	72963	53713	1.24392	0.980614	1.02762	0.889544	1.07035
O15460	Prolyl 4-hydroxylase subunit alpha-2 OS=Homo sapiens OX=9606 GN=P4HA2 PE=1 SV=1	P4HA2	60.901	26.7	34	12	12	12	4	6	5	5	8	6	8	9	9	9	11	8	8	9	9	9	11	8	8	9	9	9	11	8	145590	198210	187630	154960	220010	188040	2781200	4330400	4060900	3255100	6480900	7098100	0.595831	0.927724	0.869988	0.697357	1.38844
O15484	Calpain-5 OS=Homo sapiens OX=9606 GN=CAPN5 PE=1 SV=2	CAPN5	73.168	12.2	19	5	5	5	3	3	3	4	1	5	4	5	4	5	5	5	4	5	4	5	5	5	4	5	4	5	5	5	4668.7	4413.5	3545.6	5121.4	3916.4	3952.7	65458	53940	45250	66636	44753	54411	1.18853	0.979398	0.821612	1.20992	0.812588
O15498	Synaptobrevin homolog YKT6 OS=Homo sapiens OX=9606 GN=YKT6 PE=1 SV=1	YKT6	22.417	63.6	72	10	10	10	12	11	11	12	13	13	10	10	9	10	10	10	10	10	9	10	10	10	10	10	9	10	10	10	167350	185320	173820	180970	183050	169050	511830	517250	532870	545840	529160	498540	0.979426	0.989797	1.01969	1.04451	1.01259
O15511	Actin-related protein 2/3 complex subunit 5 OS=Homo sapiens OX=9606 GN=ARPC5 PE=1 SV=3	ARPC5	16.32	44.4	26	5	5	5	4	4	5	3	5	5	4	4	4	4	5	4	4	4	4	4	5	4	4	4	4	4	5	4	96444	82919	122360	59658	87596	88741	329260	321620	341770	314850	281760	349260	1.01911	0.99546	1.05783	0.974506	0.872088
O15514	DNA-directed RNA polymerase II subunit RPB4 OS=Homo sapiens OX=9606 GN=POLR2D PE=1 SV=1	POLR2D	16.311	61.3	15	5	5	5	2	3	2	3	2	3	3	3	4	3	3	3	3	3	4	3	3	3	3	3	4	3	3	3	12241	14677	22053	16098	14274	12930	58960	65837	64834	50902	65953	60105	0.964999	1.07756	1.06114	0.833114	1.07945
O15530	3-phosphoinositide-dependent protein kinase 1 OS=Homo sapiens OX=9606 GN=PDPK1 PE=1 SV=1	PDPK1	63.151	26.1	35	10	10	10	5	6	6	6	6	6	9	10	9	8	9	10	9	10	9	8	9	10	9	10	9	8	9	10	15698	18944	16952	17038	15597	15246	90676	92932	89624	89060	78547	78725	1.04714	1.07319	1.03499	1.02848	0.907072
O15533	Tapasin OS=Homo sapiens OX=9606 GN=TAPBP PE=1 SV=1	TAPBP	47.625	15.2	26	5	5	5	3	6	5	4	4	4	5	5	4	4	4	4	5	5	4	4	4	4	5	5	4	4	4	4	35799	46091	32002	32909	43764	34308	124150	141120	124780	135990	167200	148380	0.885079	1.00606	0.88957	0.969487	1.19199
O15541	E3 ubiquitin-protein ligase RNF113A OS=Homo sapiens OX=9606 GN=RNF113A PE=1 SV=1	RNF113A	38.787	10.2	9	2	2	2	2	1	2	1	1	2	2	2	2	2	2	2	2	2	2	2	2	2	2	2	2	2	2	2	6176.1	5102.6	4386	4982.7	3680.7	4424.7	93849	57853	60238	55516	22515	67965	1.57317	0.969777	1.00976	0.930602	0.377414
O15551	Claudin-3 OS=Homo sapiens OX=9606 GN=CLDN3 PE=1 SV=1	CLDN3	23.318	13.6	1	2	1	1	0	0	0	1	0	0	1	2	2	2	2	2	0	1	1	1	1	1	0	1	1	1	1	1		12963	7508.4	35458	13289	10536	0	0	0	0	0	0
O15554	Intermediate conductance calcium-activated potassium channel protein 4 OS=Homo sapiens OX=9606 GN=KCNN4 PE=1 SV=1	KCNN4	47.695	3.5	6	1	1	1	1	1	1	1	1	1	1	1	1	1	1	1	1	1	1	1	1	1	1	1	1	1	1	1	540.1	757.14	461.28	699.43	803.73	636.54	0	0	0	0	0	0
O43143	Pre-mRNA-splicing factor ATP-dependent RNA helicase DHX15 OS=Homo sapiens OX=9606 GN=DHX15 PE=1 SV=2	DHX15	90.932	48.8	169	29	28	29	27	31	32	24	29	26	26	26	27	24	27	25	25	25	26	23	26	24	26	26	27	24	27	25	224520	240160	235660	212620	244370	213890	929520	958550	981740	957700	909290	921120	0.985719	1.0165	1.0411	1.0156	0.964266
O43148	mRNA cap guanine-N7 methyltransferase OS=Homo sapiens OX=9606 GN=RNMT PE=1 SV=1	RNMT	54.843	16	17	5	5	5	2	4	3	2	3	3	5	5	4	5	4	5	5	5	4	5	4	5	5	5	4	5	4	5	8517	7482.5	7418.4	8185.1	7500.2	7459.5	76769	66169	74364	75612	72135	73394	1.05057	0.905509	1.01766	1.03473	0.987152
O43149	Zinc finger ZZ-type and EF-hand domain-containing protein 1 OS=Homo sapiens OX=9606 GN=ZZEF1 PE=1 SV=6	ZZEF1	331.07	12.7	79	24	24	24	9	17	15	14	16	8	17	18	18	18	18	15	17	18	18	18	18	15	17	18	18	18	18	15	2291.3	3279.5	2803.4	2934.3	2544.1	2350.3	42619	56161	52030	54604	50920	53686	0.824831	1.08692	1.00697	1.05678	0.985485
O43150	Arf-GAP with SH3 domain, ANK repeat and PH domain-containing protein 2 OS=Homo sapiens OX=9606 GN=ASAP2 PE=1 SV=3	ASAP2	111.65	4.4	8	3	3	3	2	1	2	1	2	0	2	1	2	2	2	1	2	1	2	2	2	1	2	1	2	2	2	1	480.44	229.32	345.68	491.73	427.41	216.51	19384	0	11362	0	0	0	1.26091		0.739088
O43156	TELO2-interacting protein 1 homolog OS=Homo sapiens OX=9606 GN=TTI1 PE=1 SV=3	TTI1	122.07	15.8	61	12	12	12	8	10	12	8	13	10	11	10	10	11	11	10	11	10	10	11	11	10	11	10	10	11	11	10	5925.2	7781.9	5638.9	5247.6	8254.2	6460.8	69259	85025	69809	56955	74003	70245	0.977094	1.19952	0.984853	0.803511	1.04402
O43159	Ribosomal RNA-processing protein 8 OS=Homo sapiens OX=9606 GN=RRP8 PE=1 SV=2	RRP8	50.714	27	42	8	8	8	7	7	7	6	7	8	8	7	7	8	7	7	8	7	7	8	7	7	8	7	7	8	7	7	14754	14010	12247	13455	12541	11111	89458	81258	81769	80101	74929	72145	1.11902	1.01645	1.02284	1.00197	0.937276
O43164	E3 ubiquitin-protein ligase Praja-2 OS=Homo sapiens OX=9606 GN=PJA2 PE=1 SV=4	PJA2	78.213	4.5	4	2	2	2	0	1	2	0	1	0	0	1	2	0	1	0	0	1	2	0	1	0	0	1	2	0	1	0		156.78	1125.7		166.61		0	0	0	0	0	0
O43166	Signal-induced proliferation-associated 1-like protein 1 OS=Homo sapiens OX=9606 GN=SIPA1L1 PE=1 SV=4	SIPA1L1	200.03	8.6	31	10	10	10	10	3	3	9	3	3	10	4	8	8	5	6	10	4	8	8	5	6	10	4	8	8	5	6	2467	764.12	1216.2	1895.2	862.09	1022.5	48263	27627	25939	39161	27206	28787	1.47007	0.841504	0.790088	1.19282	0.828681
O43169	Cytochrome b5 type B OS=Homo sapiens OX=9606 GN=CYB5B PE=1 SV=3	CYB5B	16.694	59.3	50	5	5	5	9	9	7	8	8	9	5	5	5	5	5	5	5	5	5	5	5	5	5	5	5	5	5	5	842250	808420	745850	818220	692330	686400	1013500	926670	952200	996290	830350	866810	1.08865	0.995381	1.0228	1.07016	0.891919
O43172	U4/U6 small nuclear ribonucleoprotein Prp4 OS=Homo sapiens OX=9606 GN=PRPF4 PE=1 SV=2	PRPF4	58.449	43.1	82	17	17	17	14	13	15	14	14	12	16	15	16	16	16	13	16	15	16	16	16	13	16	15	16	16	16	13	56793	63201	60012	48593	67605	44131	319950	374500	371940	360980	401190	383210	0.867947	1.01593	1.00898	0.979252	1.08833
O43175	D-3-phosphoglycerate dehydrogenase OS=Homo sapiens OX=9606 GN=PHGDH PE=1 SV=4	PHGDH	56.65	45.6	105	19	19	19	18	20	17	20	16	14	19	18	18	19	17	16	19	18	18	19	17	16	19	18	18	19	17	16	186430	105080	125980	183630	84299	83092	717810	405030	426750	710130	315210	314520	1.49055	0.841053	0.886155	1.4746	0.65454
O43181	NADH dehydrogenase [ubiquinone] iron-sulfur protein 4, mitochondrial OS=Homo sapiens OX=9606 GN=NDUFS4 PE=1 SV=1	NDUFS4	20.108	14.3	10	2	2	2	1	2	2	2	1	2	2	2	2	2	2	2	2	2	2	2	2	2	2	2	2	2	2	2	34931	28810	26752	33409	28403	25967	258850	199290	199620	257700	206860	198750	1.17564	0.90513	0.906629	1.17041	0.939511
O43187	Interleukin-1 receptor-associated kinase-like 2 OS=Homo sapiens OX=9606 GN=IRAK2 PE=1 SV=2	IRAK2	69.432	1.4	3	1	1	1	0	1	1	0	0	1	1	1	1	1	1	1	1	1	1	1	1	1	1	1	1	1	1	1	18057	19634	4012.5	16813	17666	23987	0	0	0	0	0	0
O43194	G-protein coupled receptor 39 OS=Homo sapiens OX=9606 GN=GPR39 PE=1 SV=1	GPR39	51.328	3.3	1	1	1	1	0	0	1	0	0	0	0	0	1	0	0	1	0	0	1	0	0	1	0	0	1	0	0	1			2456.5			2229	0	0	0	0	0	0
O43237	Cytoplasmic dynein 1 light intermediate chain 2 OS=Homo sapiens OX=9606 GN=DYNC1LI2 PE=1 SV=1	DYNC1LI2	54.099	60.4	135	21	19	21	22	23	21	23	23	23	20	20	20	20	20	20	18	18	18	18	18	18	20	20	20	20	20	20	200760	199680	184870	211390	195630	181520	680460	646250	625430	723440	633690	629650	1.03652	0.984407	0.952693	1.10199	0.965275
O43242	26S proteasome non-ATPase regulatory subunit 3 OS=Homo sapiens OX=9606 GN=PSMD3 PE=1 SV=2	PSMD3	60.977	44.4	116	22	22	22	20	21	18	19	18	20	18	21	21	20	21	20	18	21	21	20	21	20	18	21	21	20	21	20	155600	171060	162460	163040	162950	157820	993240	979190	1008300	1005600	938240	1004500	1.00512	0.990904	1.02036	1.01763	0.949464
O43251	RNA binding protein fox-1 homolog 2 OS=Homo sapiens OX=9606 GN=RBFOX2 PE=1 SV=3	RBFOX2	41.373	6.7	3	1	1	1	0	1	0	1	1	0	1	1	1	1	1	1	1	1	1	1	1	1	1	1	1	1	1	1	3634.5	4870.4	4761.9	3627.4	4801.7	4586.2	0	0	0	0	0	0
O43252	Bifunctional 3'-phosphoadenosine 5'-phosphosulfate synthase 1 OS=Homo sapiens OX=9606 GN=PAPSS1 PE=1 SV=2	PAPSS1	70.832	36.7	66	15	14	14	12	11	12	11	11	9	15	14	15	13	14	14	14	13	14	13	13	13	14	13	14	13	13	13	24568	25078	22956	24142	25094	23640	126130	122950	116080	125390	125360	118050	1.03109	1.0051	0.948935	1.02504	1.0248
O43264	Centromere/kinetochore protein zw10 homolog OS=Homo sapiens OX=9606 GN=ZW10 PE=1 SV=3	ZW10	88.828	42.1	83	21	21	21	14	12	14	12	17	14	15	16	16	14	17	19	15	16	16	14	17	19	15	16	16	14	17	19	28435	24144	25002	24488	29562	25344	182420	185990	186790	188060	184910	180340	0.987379	1.0067	1.01103	1.01791	1.00086
O43272	Proline dehydrogenase 1, mitochondrial OS=Homo sapiens OX=9606 GN=PRODH PE=1 SV=3	PRODH	68.001	4.7	6	3	3	3	0	2	0	3	1	0	0	2	1	3	1	1	0	2	1	3	1	1	0	2	1	3	1	1		587.08	170.37	1567.4	522.1	144.93	0	16540	0	33227	0	0		0.664697		1.3353
O43278	Kunitz-type protease inhibitor 1 OS=Homo sapiens OX=9606 GN=SPINT1 PE=1 SV=2	SPINT1	58.397	31.8	63	15	15	15	10	10	10	8	13	12	14	14	13	13	15	13	14	14	13	13	15	13	14	14	13	13	15	13	29660	30569	30017	31749	38224	32049	112110	113500	129190	137370	132380	125960	0.896271	0.907383	1.03282	1.09821	1.05832
O43286	Beta-1,4-galactosyltransferase 5 OS=Homo sapiens OX=9606 GN=B4GALT5 PE=1 SV=1	B4GALT5	45.118	2.1	12	1	1	1	2	2	2	2	2	2	1	1	1	1	1	1	1	1	1	1	1	1	1	1	1	1	1	1	3378.7	4061.8	3569.4	2975.7	4144.6	3376.1	0	0	0	0	0	0
O43290	U4/U6.U5 tri-snRNP-associated protein 1 OS=Homo sapiens OX=9606 GN=SART1 PE=1 SV=1	SART1	90.254	29.6	88	17	17	17	16	17	14	14	14	13	15	16	16	15	15	15	15	16	16	15	15	15	15	16	16	15	15	15	34449	34780	34520	37334	35710	33829	240080	203470	220000	235120	218800	224680	1.07326	0.9096	0.983497	1.05109	0.978132
O43291	Kunitz-type protease inhibitor 2 OS=Homo sapiens OX=9606 GN=SPINT2 PE=1 SV=2	SPINT2	28.228	10.3	8	2	2	2	2	1	2	1	1	1	2	1	2	2	2	2	2	1	2	2	2	2	2	1	2	2	2	2	8359.9	13282	13600	7663.9	14588	11992	109480	0	180320	95273	141100	90494	0.887675		1.46205	0.772483	1.14405
O43292	Glycosylphosphatidylinositol anchor attachment 1 protein OS=Homo sapiens OX=9606 GN=GPAA1 PE=1 SV=3	GPAA1	67.622	8.5	22	5	5	5	2	5	3	5	3	4	4	5	5	5	5	4	4	5	5	5	5	4	4	5	5	5	5	4	15497	14271	13812	15647	16004	14200	108920	91952	89887	104380	96909	92946	1.11714	0.943107	0.921927	1.07058	0.993949
O43293	Death-associated protein kinase 3 OS=Homo sapiens OX=9606 GN=DAPK3 PE=1 SV=1	DAPK3	52.535	14.1	20	5	5	5	2	4	3	3	5	3	5	5	4	5	5	4	5	5	4	5	5	4	5	5	4	5	5	4	5420.2	7740.7	4850.3	5398.6	8742.9	5207.7	31618	34870	35390	30341	37920	38264	0.910294	1.00392	1.01889	0.873529	1.09173
O43294	Transforming growth factor beta-1-induced transcript 1 protein OS=Homo sapiens OX=9606 GN=TGFB1I1 PE=1 SV=2	TGFB1I1	49.814	5.4	5	2	2	2	1	1	1	0	0	2	1	1	2	1	1	2	1	1	2	1	1	2	1	1	2	1	1	2	544.32	333.39	488.6	163.33	336.09	595.08	0	0	7078.1	0	0	10217			0.818509
O43296	Zinc finger protein 264 OS=Homo sapiens OX=9606 GN=ZNF264 PE=1 SV=1	ZNF264	70.586	7.2	3	3	2	2	1	0	0	2	0	0	2	1	1	3	1	0	1	1	1	2	1	0	1	1	1	2	1	0	80.687	1088	1228.8	187.11	722.95		0	0	0	0	0	0
O43299	AP-5 complex subunit zeta-1 OS=Homo sapiens OX=9606 GN=AP5Z1 PE=1 SV=2	AP5Z1	88.604	7.2	13	3	3	3	2	3	2	2	2	2	2	3	2	2	2	2	2	3	2	2	2	2	2	3	2	2	2	2	1562.4	2146.4	1416.9	1451.3	2111.3	1499.4	48123	58845	43198	45300	63123	48630	0.939844	1.14925	0.843659	0.884711	1.2328
O43314	Inositol hexakisphosphate and diphosphoinositol-pentakisphosphate kinase 2 OS=Homo sapiens OX=9606 GN=PPIP5K2 PE=1 SV=3	PPIP5K2	140.41	1.1	5	1	1	1	0	1	1	1	1	1	0	1	1	1	1	1	0	1	1	1	1	1	0	1	1	1	1	1		516.67	509.86	610.43	533.94	536.55	0	0	0	0	0	0
O43318	Mitogen-activated protein kinase kinase kinase 7 OS=Homo sapiens OX=9606 GN=MAP3K7 PE=1 SV=1	MAP3K7	67.195	5.1	7	2	2	2	0	2	1	2	1	1	2	2	1	2	2	2	2	2	1	2	2	2	2	2	1	2	2	2	1073.9	1163.2	915.1	1437.6	1232.5	1199	25579	24020	0	33410	25659	28699	0.931046	0.8743		1.21609	0.933958
O43324	Eukaryotic translation elongation factor 1 epsilon-1 OS=Homo sapiens OX=9606 GN=EEF1E1 PE=1 SV=1	EEF1E1	19.81	29.9	23	5	5	5	2	4	4	4	5	4	2	5	4	4	5	4	2	5	4	4	5	4	2	5	4	4	5	4	31408	50192	49593	56461	55231	47905	304370	270630	306330	344910	300360	295270	1.00239	0.891271	1.00884	1.1359	0.989181
O43353	Receptor-interacting serine/threonine-protein kinase 2 OS=Homo sapiens OX=9606 GN=RIPK2 PE=1 SV=2	RIPK2	61.194	41.1	54	14	14	14	8	8	8	10	11	9	12	11	11	12	14	10	12	11	11	12	14	10	12	11	11	12	14	10	22466	21208	20182	22714	31742	18502	150370	137850	143310	153990	157630	138450	1.02339	0.938181	0.97534	1.04803	1.0728
O43379	WD repeat-containing protein 62 OS=Homo sapiens OX=9606 GN=WDR62 PE=1 SV=4	WDR62	165.95	3.2	12	3	3	3	2	2	3	2	1	2	2	2	3	2	2	2	2	2	3	2	2	2	2	2	3	2	2	2	417.67	429.55	461.83	237.63	387.89	378.83	17465	17582	16883	10045	15967	17136	1.10215	1.10953	1.06542	0.633901	1.00761
O43390	Heterogeneous nuclear ribonucleoprotein R OS=Homo sapiens OX=9606 GN=HNRNPR PE=1 SV=1	HNRNPR	70.942	43	177	26	21	26	31	26	29	28	31	32	24	25	25	24	24	24	20	20	20	20	20	20	24	25	25	24	24	24	326770	331990	322790	324500	308380	303300	1537000	1488500	1564300	1564400	1444100	1545900	1.00851	0.976685	1.02642	1.02649	0.947551
O43395	U4/U6 small nuclear ribonucleoprotein Prp3 OS=Homo sapiens OX=9606 GN=PRPF3 PE=1 SV=2	PRPF3	77.528	20.6	55	13	13	13	9	9	10	9	10	8	11	12	13	11	12	11	11	12	13	11	12	11	11	12	13	11	12	11	59284	80814	88952	68843	75942	88912	1338100	1503300	1539300	1326200	1546100	1574000	0.90955	1.02184	1.04631	0.901461	1.05093
O43396	Thioredoxin-like protein 1 OS=Homo sapiens OX=9606 GN=TXNL1 PE=1 SV=3	TXNL1	32.251	46.4	41	9	9	9	5	9	8	5	8	6	7	9	8	8	8	7	7	9	8	8	8	7	7	9	8	8	8	7	28476	61899	58233	36391	58108	41017	175870	319710	289520	194330	290190	260690	0.689547	1.25351	1.13514	0.761924	1.13777
O43399	Tumor protein D54 OS=Homo sapiens OX=9606 GN=TPD52L2 PE=1 SV=2	TPD52L2	22.237	52.4	56	9	9	9	9	10	9	9	9	10	8	9	8	9	9	8	8	9	8	9	9	8	8	9	8	9	9	8	443870	412450	407000	372050	408540	343180	1641300	1480800	1569600	1378200	1489400	1442700	1.09396	0.986981	1.04617	0.918596	0.992713
O43402	ER membrane protein complex subunit 8 OS=Homo sapiens OX=9606 GN=EMC8 PE=1 SV=1	EMC8	23.773	35.7	41	6	6	6	6	7	7	6	8	7	4	6	6	4	6	6	4	6	6	4	6	6	4	6	6	4	6	6	34795	36208	32885	38666	36849	31105	157310	150060	147990	178830	151870	144710	1.01406	0.967328	0.953984	1.15279	0.978996
O43414	ERI1 exoribonuclease 3 OS=Homo sapiens OX=9606 GN=ERI3 PE=1 SV=2	ERI3	37.238	11.9	8	3	3	3	1	1	2	2	1	1	3	3	3	3	2	3	3	3	3	3	2	3	3	3	3	3	2	3	12342	12344	11423	11252	7382.8	10877	86247	76379	79603	76630	80579	81647	1.07566	0.952584	0.992793	0.955715	1.00497
O43422	52 kDa repressor of the inhibitor of the protein kinase OS=Homo sapiens OX=9606 GN=THAP12 PE=1 SV=2	THAP12	87.703	3.8	3	2	2	2	0	1	1	1	0	0	1	2	2	1	1	1	1	2	2	1	1	1	1	2	2	1	1	1	455.23	669.44	467.83	298.05	355.34	455.16	0	15431	12197	0	0	0		1.11705	0.882945
O43427	Acidic fibroblast growth factor intracellular-binding protein OS=Homo sapiens OX=9606 GN=FIBP PE=1 SV=3	FIBP	41.878	3.6	6	1	1	1	1	1	1	1	1	1	1	1	1	1	1	1	1	1	1	1	1	1	1	1	1	1	1	1	1819	1475.6	1366.5	1724.2	1604.6	1476.5	0	0	0	0	0	0
O43432	Eukaryotic translation initiation factor 4 gamma 3 OS=Homo sapiens OX=9606 GN=EIF4G3 PE=1 SV=2	EIF4G3	176.65	6.9	8	8	4	4	3	1	0	3	1	0	6	6	6	8	6	6	2	2	2	4	2	2	2	2	2	4	2	2	31072	30183	30146	310.9	30336	30337	3706900	2009000	2045900	416810	2085000	1962900	1.81911	0.98589	1.004	0.204544	1.02319
O43447	Peptidyl-prolyl cis-trans isomerase H OS=Homo sapiens OX=9606 GN=PPIH PE=1 SV=1	PPIH	19.208	15.3	15	3	3	3	3	3	3	3	2	1	3	3	3	3	2	2	3	3	3	3	2	2	3	3	3	3	2	2	20764	24347	14964	21529	14796	12922	85323	95215	88435	88552	91540	89447	0.950653	1.06087	0.985326	0.98663	1.01992
O43462	Membrane-bound transcription factor site-2 protease OS=Homo sapiens OX=9606 GN=MBTPS2 PE=1 SV=1	MBTPS2	57.443	4.8	7	2	2	2	1	1	1	1	1	2	1	2	2	1	1	2	1	2	2	1	1	2	1	2	2	1	1	2	2853.9	4105	4493.5	2985.9	2653.3	4042	0	30034	33498	0	0	31818		0.944961	1.05395
O43464	Serine protease HTRA2, mitochondrial OS=Homo sapiens OX=9606 GN=HTRA2 PE=1 SV=2	HTRA2	48.84	13.3	15	4	4	4	2	2	2	4	2	3	3	4	3	4	4	3	3	4	3	4	4	3	3	4	3	4	4	3	13241	9165.9	8011.1	20597	12630	9155	203470	101340	93743	164800	118200	68539	1.62756	0.810621	0.749852	1.31824	0.945484
O43488	Aflatoxin B1 aldehyde reductase member 2 OS=Homo sapiens OX=9606 GN=AKR7A2 PE=1 SV=3	AKR7A2	39.589	27.3	41	6	6	6	8	7	7	7	6	6	6	6	6	6	6	6	6	6	6	6	6	6	6	6	6	6	6	6	100360	70681	78027	83295	95353	62299	325710	273220	282750	361760	287110	261230	1.09068	0.914911	0.946824	1.2114	0.961424
O43491	Band 4.1-like protein 2 OS=Homo sapiens OX=9606 GN=EPB41L2 PE=1 SV=1	EPB41L2	112.59	28.2	106	21	18	21	20	14	17	19	18	18	20	20	19	20	20	20	17	17	16	17	17	17	20	20	19	20	20	20	33352	23734	23561	32307	27529	30767	204760	133930	164550	197230	157180	191880	1.17058	0.765657	0.940707	1.12753	0.898574
O43493	Trans-Golgi network integral membrane protein 2 OS=Homo sapiens OX=9606 GN=TGOLN2 PE=1 SV=4	TGOLN2	45.879	20.6	30	6	6	6	4	6	6	4	5	5	4	6	5	5	5	4	4	6	5	5	5	4	4	6	5	5	5	4	12332	15870	13038	12043	12367	11032	89597	84716	84841	83181	74100	84618	1.0729	1.01446	1.01595	0.996074	0.887331
O43504	Ragulator complex protein LAMTOR5 OS=Homo sapiens OX=9606 GN=LAMTOR5 PE=1 SV=1	LAMTOR5	9.6138	59.3	30	3	3	3	5	6	4	5	5	5	3	3	3	3	3	3	3	3	3	3	3	3	3	3	3	3	3	3	231290	279670	237050	228830	284630	244070	437990	507320	487480	441040	518540	503750	0.9074	1.05103	1.00993	0.913719	1.07428
O43520	Phospholipid-transporting ATPase IC OS=Homo sapiens OX=9606 GN=ATP8B1 PE=1 SV=3	ATP8B1	143.69	2.6	6	2	2	2	1	1	1	0	1	2	1	1	1	1	1	2	1	1	1	1	1	2	1	1	1	1	1	2	308.95	273.95	259.59	430.61	265.47	380.09	0	0	0	0	0	0
O43524	Forkhead box protein O3 OS=Homo sapiens OX=9606 GN=FOXO3 PE=1 SV=1	FOXO3	71.276	4.9	4	2	2	2	0	1	1	0	2	0	1	1	1	1	2	1	1	1	1	1	2	1	1	1	1	1	2	1	325.63	571.6	463.01	213.39	1057.1	299.99	0	0	0	0	0	0
O43570	Carbonic anhydrase 12 OS=Homo sapiens OX=9606 GN=CA12 PE=1 SV=1	CA12	39.45	11.9	16	3	3	3	2	2	4	1	4	3	2	3	3	2	3	3	2	3	3	2	3	3	2	3	3	2	3	3	1517.7	4198.6	5989.6	4012.9	5122.8	7184	26973	22221	32263	22675	25074	41996	0.945304	0.778764	1.1307	0.794675	0.878751
O43572	A-kinase anchor protein 10, mitochondrial OS=Homo sapiens OX=9606 GN=AKAP10 PE=1 SV=2	AKAP10	73.817	8.8	11	4	4	4	3	2	0	3	2	1	2	2	2	3	3	3	2	2	2	3	3	3	2	2	2	3	3	3	1032.6	863.9	947.13	999.06	1268.3	972.13	17005	12073	0	9598.7	11483	0	1.35607	0.962765		0.765451	0.915715
O43583	Density-regulated protein OS=Homo sapiens OX=9606 GN=DENR PE=1 SV=2	DENR	22.092	42.9	29	6	6	6	5	5	5	4	6	4	5	5	6	5	6	5	5	5	6	5	6	5	5	5	6	5	6	5	199790	141810	198700	215400	171410	168080	509020	429410	496500	537740	427750	465670	1.0656	0.898946	1.0394	1.12573	0.895471
O43592	Exportin-T OS=Homo sapiens OX=9606 GN=XPOT PE=1 SV=2	XPOT	109.96	28.7	123	20	20	20	23	18	21	21	17	23	19	18	19	19	17	19	19	18	19	19	17	19	19	18	19	19	17	19	50509	34411	40636	50527	30698	34535	241440	169940	204020	237820	165890	175900	1.21224	0.853248	1.02436	1.19406	0.832914
O43598	2'-deoxynucleoside 5'-phosphate N-hydrolase 1 OS=Homo sapiens OX=9606 GN=DNPH1 PE=1 SV=1	DNPH1	19.108	38.5	35	4	4	4	6	6	6	5	6	6	4	4	4	4	4	4	4	4	4	4	4	4	4	4	4	4	4	4	112810	80882	84506	102180	79834	81575	224240	152870	160320	208490	149970	151010	1.28517	0.87613	0.918827	1.1949	0.859509
O43615	Mitochondrial import inner membrane translocase subunit TIM44 OS=Homo sapiens OX=9606 GN=TIMM44 PE=1 SV=2	TIMM44	51.355	32.3	59	13	13	13	9	11	9	11	10	9	12	12	12	12	13	12	12	12	12	12	13	12	12	12	12	12	13	12	119470	97510	100980	113340	94109	91741	608200	452510	492680	578960	444580	473460	1.19631	0.89007	0.969083	1.13879	0.874472
O43617	Trafficking protein particle complex subunit 3 OS=Homo sapiens OX=9606 GN=TRAPPC3 PE=1 SV=1	TRAPPC3	20.274	26.7	20	4	4	4	4	4	2	3	5	2	4	3	3	3	4	3	4	3	3	3	4	3	4	3	3	3	4	3	25562	27697	24610	23615	29977	23809	90449	92822	88255	87713	98017	97013	0.979117	1.0048	0.955366	0.949499	1.06104
O43633	Charged multivesicular body protein 2a OS=Homo sapiens OX=9606 GN=CHMP2A PE=1 SV=1	CHMP2A	25.104	14.9	19	4	4	4	5	2	4	3	2	3	4	3	4	4	4	3	4	3	4	4	4	3	4	3	4	4	4	3	178060	63951	133280	144680	124170	76262	660990	426480	501500	625190	413890	441930	1.29185	0.833517	0.980137	1.22188	0.808911
O43639	Cytoplasmic protein NCK2 OS=Homo sapiens OX=9606 GN=NCK2 PE=1 SV=2	NCK2	42.915	3.4	3	1	1	1	1	0	1	0	0	1	1	0	1	0	0	1	1	0	1	0	0	1	1	0	1	0	0	1	397.49		341.55			340.53	0	0	0	0	0	0
O43657	Tetraspanin-6 OS=Homo sapiens OX=9606 GN=TSPAN6 PE=1 SV=1	TSPAN6	27.563	18.8	17	4	4	4	2	4	4	2	3	2	2	3	4	2	3	3	2	3	4	2	3	3	2	3	4	2	3	3	22347	37709	37468	19088	32128	34042	121620	180640	178040	109380	157780	186480	0.781335	1.1605	1.1438	0.7027	1.01364
O43660	Pleiotropic regulator 1 OS=Homo sapiens OX=9606 GN=PLRG1 PE=1 SV=1	PLRG1	57.193	52.7	79	18	18	18	12	14	14	13	15	11	15	17	16	15	17	16	15	17	16	15	17	16	15	17	16	15	17	16	44148	50214	42083	45215	50192	46614	337850	345590	329380	349490	361720	354530	0.975242	0.997585	0.950793	1.00884	1.04415
O43663	Protein regulator of cytokinesis 1 OS=Homo sapiens OX=9606 GN=PRC1 PE=1 SV=2	PRC1	71.606	12.7	9	5	5	5	0	3	2	0	2	2	2	5	2	0	4	4	2	5	2	0	4	4	2	5	2	0	4	4	323.16	3981.4	1153.8		2804.5	3038.9	0	42342	25045	0	32783	32437		1.27722	0.755465		0.988877
O43665	Regulator of G-protein signaling 10 OS=Homo sapiens OX=9606 GN=RGS10 PE=1 SV=3	RGS10	21.21	35.9	17	4	4	4	3	3	2	3	3	3	3	4	3	3	3	3	3	4	3	3	3	3	3	4	3	3	3	3	39278	77009	32734	35235	24145	24132	190020	176690	205750	178210	134140	150030	1.10174	1.02445	1.19294	1.03326	0.777743
O43670	BUB3-interacting and GLEBS motif-containing protein ZNF207 OS=Homo sapiens OX=9606 GN=ZNF207 PE=1 SV=1	ZNF207	50.75	13.6	32	5	5	5	4	6	5	6	5	6	4	5	5	5	5	5	4	5	5	5	5	5	4	5	5	5	5	5	60945	85779	82875	64620	81693	79329	321130	363180	359240	323330	346130	359770	0.929563	1.05128	1.03988	0.935931	1.00193
O43674	NADH dehydrogenase [ubiquinone] 1 beta subcomplex subunit 5, mitochondrial OS=Homo sapiens OX=9606 GN=NDUFB5 PE=1 SV=1	NDUFB5	21.75	21.2	21	5	5	5	4	5	5	3	2	2	4	5	5	3	4	5	4	5	5	3	4	5	4	5	5	3	4	5	53052	58049	55304	35662	47480	50427	290650	252980	233830	259630	263980	225430	1.14242	0.994353	0.919083	1.02049	1.03759
O43676	NADH dehydrogenase [ubiquinone] 1 beta subcomplex subunit 3 OS=Homo sapiens OX=9606 GN=NDUFB3 PE=1 SV=3	NDUFB3	11.402	17.3	10	2	2	2	1	2	1	2	2	2	2	2	2	2	2	2	2	2	2	2	2	2	2	2	2	2	2	2	39936	35622	33011	35304	36530	33171	198510	168480	176140	187680	167170	191010	1.09373	0.928273	0.970477	1.03406	0.921055
O43678	NADH dehydrogenase [ubiquinone] 1 alpha subcomplex subunit 2 OS=Homo sapiens OX=9606 GN=NDUFA2 PE=1 SV=3	NDUFA2	10.921	32.3	13	3	3	3	3	3	1	2	2	2	3	3	3	3	2	3	3	3	3	3	2	3	3	3	3	3	2	3	80588	77629	70227	75787	63193	75444	234450	216700	209510	220020	191240	231040	1.07962	0.997882	0.964773	1.01317	0.880641
O43681	ATPase GET3 OS=Homo sapiens OX=9606 GN=GET3 PE=1 SV=2	GET3	38.792	43.1	71	11	11	11	13	12	12	12	10	12	10	11	11	11	10	10	10	11	11	11	10	10	10	11	11	11	10	10	289720	252990	242970	287330	251430	228370	891970	754340	780640	884970	729940	766560	1.11301	0.941274	0.974091	1.10427	0.910827
O43684	Mitotic checkpoint protein BUB3 OS=Homo sapiens OX=9606 GN=BUB3 PE=1 SV=1	BUB3	37.154	43.3	51	10	10	10	6	8	9	7	11	10	10	9	10	8	9	10	10	9	10	8	9	10	10	9	10	8	9	10	162020	183440	198450	133880	196020	187090	459530	555860	609840	448610	544940	612270	0.853339	1.03222	1.13246	0.83306	1.01194
O43688	Phospholipid phosphatase 2 OS=Homo sapiens OX=9606 GN=PLPP2 PE=1 SV=1	PLPP2	32.573	19.8	26	4	4	4	3	4	4	5	4	6	3	4	4	4	4	4	3	4	4	4	4	4	3	4	4	4	4	4	16367	29218	24934	26489	28185	24827	86026	89191	84554	104890	86655	82377	0.96714	1.00272	0.950591	1.17922	0.974212
O43707	Alpha-actinin-4 OS=Homo sapiens OX=9606 GN=ACTN4 PE=1 SV=2	ACTN4	104.85	67	468	57	38	57	82	80	80	72	78	76	55	57	57	56	56	56	37	38	38	37	37	38	55	57	57	56	56	56	1416500	1342100	1362900	1269400	1278700	1248700	6128800	5298000	5713600	5367200	5135200	5357600	1.11431	0.963261	1.03882	0.975843	0.933661
O43708	Maleylacetoacetate isomerase OS=Homo sapiens OX=9606 GN=GSTZ1 PE=1 SV=3	GSTZ1	24.212	25.9	21	4	4	4	4	4	2	5	4	2	4	4	4	4	4	4	4	4	4	4	4	4	4	4	4	4	4	4	71624	71499	60695	79280	64172	52616	258330	236430	223300	284620	219980	192760	1.09507	1.00223	0.946574	1.20651	0.932501
O43709	Probable 18S rRNA (guanine-N(7))-methyltransferase OS=Homo sapiens OX=9606 GN=BUD23 PE=1 SV=2	BUD23	31.88	6.4	8	1	1	1	2	1	1	2	1	1	1	1	1	1	1	1	1	1	1	1	1	1	1	1	1	1	1	1	14702	10891	13430	13182	13061	11081	158420	0	126940	143130	113130	100050
O43715	TP53-regulated inhibitor of apoptosis 1 OS=Homo sapiens OX=9606 GN=TRIAP1 PE=1 SV=1	TRIAP1	8.7858	18.4	1	1	1	1	1	0	0	0	0	0	1	1	0	0	1	1	1	1	0	0	1	1	1	1	0	0	1	1	2763.5	2014.7			2423.5	1210.4	0	0	0	0	0	0
O43716	Glutamyl-tRNA(Gln) amidotransferase subunit C, mitochondrial OS=Homo sapiens OX=9606 GN=GATC PE=1 SV=1	GATC	15.086	14.7	6	2	2	2	0	2	1	0	2	1	2	2	1	1	2	2	2	2	1	1	2	2	2	2	1	1	2	2	2449.9	3658.2	2203.1	1244	3581.3	3108.7	14819	19953	0	0	20221	17345	0.819431	1.10332			1.11814
O43719	HIV Tat-specific factor 1 OS=Homo sapiens OX=9606 GN=HTATSF1 PE=1 SV=1	HTATSF1	85.852	19.5	43	10	10	10	8	7	6	8	8	6	9	10	8	9	9	9	9	10	8	9	9	9	9	10	8	9	9	9	15456	16014	14843	14789	15512	14116	141510	142390	153940	140460	141540	145720	0.980937	0.987037	1.0671	0.973659	0.981145
Q15438	Cytohesin-1 OS=Homo sapiens OX=9606 GN=CYTH1 PE=1 SV=1	CYTH1	46.412	4.5	3	2	2	2	2	0	0	0	1	0	2	1	1	1	2	1	2	1	1	1	2	1	2	1	1	1	2	1	3238.5	1790	2003.4	2397.4	2100.9	1783.3	53269	0	0	0	30482	0	1.27208				0.72792
O43741	5'-AMP-activated protein kinase subunit beta-2 OS=Homo sapiens OX=9606 GN=PRKAB2 PE=1 SV=1	PRKAB2	30.302	41.5	45	8	7	8	9	6	8	8	8	6	8	7	7	8	8	7	7	6	6	7	7	6	8	7	7	8	8	7	40366	30472	29540	35925	31553	27660	101130	86109	82897	93641	79187	83062	1.15352	0.982183	0.945546	1.0681	0.903229
O43747	AP-1 complex subunit gamma-1 OS=Homo sapiens OX=9606 GN=AP1G1 PE=1 SV=5	AP1G1	91.35	31.6	97	21	21	21	16	16	16	17	14	18	19	18	19	19	18	20	19	18	19	19	18	20	19	18	19	19	18	20	52762	53767	52278	61386	53655	57834	302000	304340	300790	347160	289910	287570	0.989207	0.996872	0.985244	1.13713	0.949606
O43752	Syntaxin-6 OS=Homo sapiens OX=9606 GN=STX6 PE=1 SV=1	STX6	29.176	11.8	7	2	2	2	2	1	1	0	2	1	2	2	1	2	2	1	2	2	1	2	2	1	2	2	1	2	2	1	8041.4	7080	4069.9	6432.4	6210.7	4208.1	53534	43719	0	42961	39879	0	1.18903	0.971032		0.954196	0.885742
O43765	Small glutamine-rich tetratricopeptide repeat-containing protein alpha OS=Homo sapiens OX=9606 GN=SGTA PE=1 SV=1	SGTA	34.063	34.8	43	9	9	9	8	8	8	7	6	6	8	8	9	8	8	8	8	8	9	8	8	8	8	8	9	8	8	8	175570	197470	161490	157950	158470	158290	510540	541230	544460	538010	527520	571810	0.947324	1.00427	1.01026	0.998296	0.978831
O43766	Lipoyl synthase, mitochondrial OS=Homo sapiens OX=9606 GN=LIAS PE=1 SV=3	LIAS	41.911	11.3	6	2	2	2	1	1	1	1	1	1	1	1	1	1	1	1	1	1	1	1	1	1	1	1	1	1	1	1	691.61	264.16	486.53	583.83	575.85	393.54	0	0	0	0	0	0
O43768	Alpha-endosulfine OS=Homo sapiens OX=9606 GN=ENSA PE=1 SV=1	ENSA	13.389	42.1	19	4	4	4	3	3	4	3	2	4	4	4	4	4	4	4	4	4	4	4	4	4	4	4	4	4	4	4	11789	13116	11384	11680	12028	9622.9	57515	54668	52733	53320	56869	39242	1.0978	1.04346	1.00652	1.01773	1.08547
O43772	Mitochondrial carnitine/acylcarnitine carrier protein OS=Homo sapiens OX=9606 GN=SLC25A20 PE=1 SV=1	SLC25A20	32.943	32.6	23	8	8	8	5	3	4	5	5	1	6	5	7	6	7	5	6	5	7	6	7	5	6	5	7	6	7	5	9089.7	14687	11404	8847.6	11183	8557.3	53901	58197	50610	60513	48112	41683	1.03319	1.11554	0.97011	1.15993	0.922228
O43776	Asparagine--tRNA ligase, cytoplasmic OS=Homo sapiens OX=9606 GN=NARS1 PE=1 SV=1	NARS1	62.942	41.4	132	19	19	19	26	21	23	23	21	18	19	19	19	18	17	17	19	19	19	18	17	17	19	19	19	18	17	17	525240	391660	326490	476480	271930	270340	1684300	1143600	1265100	1612200	1025400	1094100	1.29153	0.876915	0.970082	1.23624	0.786279
O43795	Unconventional myosin-Ib OS=Homo sapiens OX=9606 GN=MYO1B PE=1 SV=3	MYO1B	131.98	30.8	186	28	28	28	33	33	29	31	28	32	27	27	26	25	27	27	27	27	26	25	27	27	27	27	26	25	27	27	111020	94798	93051	97184	103850	92392	500840	438060	442760	493240	442260	432770	1.09277	0.955792	0.966046	1.07619	0.964955
O43805	Sjoegren syndrome nuclear autoantigen 1 OS=Homo sapiens OX=9606 GN=SSNA1 PE=1 SV=2	SSNA1	13.596	24.4	11	2	2	2	2	1	2	2	2	2	2	2	2	2	2	2	2	2	2	2	2	2	2	2	2	2	2	2	8558.7	9806.9	9671.2	6395.5	13432	10597	35432	39090	41366	26771	53907	47037	0.872699	0.962796	1.01885	0.659376	1.32774
O43808	Peroxisomal membrane protein PMP34 OS=Homo sapiens OX=9606 GN=SLC25A17 PE=1 SV=1	SLC25A17	34.566	20.5	19	5	5	5	3	3	3	4	3	3	5	5	4	4	5	5	5	5	4	4	5	5	5	5	4	4	5	5	25103	22630	17939	19686	23227	22798	132910	110400	140360	136590	121630	134830	1.0267	0.852817	1.08425	1.05513	0.939566
O43809	Cleavage and polyadenylation specificity factor subunit 5 OS=Homo sapiens OX=9606 GN=NUDT21 PE=1 SV=1	NUDT21	26.227	45.8	73	10	10	10	12	13	11	13	12	12	9	10	9	9	9	9	9	10	9	9	9	9	9	10	9	9	9	9	164090	206610	184110	185570	195930	172080	512540	593380	569000	573940	576650	553800	0.91002	1.05355	1.01026	1.01904	1.02385
O43813	Glutathione S-transferase LANCL1 OS=Homo sapiens OX=9606 GN=LANCL1 PE=1 SV=1	LANCL1	45.283	40.4	45	10	10	10	6	5	7	10	9	8	8	8	8	10	9	9	8	8	8	10	9	9	8	8	8	10	9	9	39632	28519	27279	40380	33504	31284	161090	115380	115030	151060	113660	108760	1.26348	0.904965	0.90222	1.18481	0.891474
O43815	Striatin OS=Homo sapiens OX=9606 GN=STRN PE=1 SV=4	STRN	86.131	30.3	66	15	15	15	11	12	9	14	11	9	13	15	12	14	13	13	13	15	12	14	13	13	13	15	12	14	13	13	16001	15664	14428	16803	15984	13131	143320	127000	134890	149840	139780	115900	1.06067	0.939894	0.998285	1.10893	1.03448
O43818	U3 small nucleolar RNA-interacting protein 2 OS=Homo sapiens OX=9606 GN=RRP9 PE=1 SV=1	RRP9	51.84	31.2	52	10	10	10	8	7	9	9	11	8	9	9	9	9	10	9	9	9	9	9	10	9	9	9	9	9	10	9	44844	43917	43590	43180	47207	42188	219740	206260	220120	214750	219000	218280	1.01563	0.953326	1.01739	0.992566	1.01221
O43819	Protein SCO2 homolog, mitochondrial OS=Homo sapiens OX=9606 GN=SCO2 PE=1 SV=3	SCO2	29.81	30.1	18	5	5	5	2	5	2	2	3	4	4	5	5	4	5	4	4	5	5	4	5	4	4	5	5	4	5	4	11049	15186	13710	20229	43198	11221	139760	159820	158500	134500	143670	157580	0.938165	1.07282	1.06396	0.902856	0.964412
O43823	A-kinase anchor protein 8 OS=Homo sapiens OX=9606 GN=AKAP8 PE=1 SV=1	AKAP8	76.107	5.9	16	3	3	3	2	3	3	3	2	3	3	3	3	3	3	3	3	3	3	3	3	3	3	3	3	3	3	3	8723.4	10715	9925.1	9086.9	11052	10222	139020	164140	161890	144400	165340	176870	0.87649	1.03486	1.02068	0.910409	1.04243
O43824	Putative GTP-binding protein 6 OS=Homo sapiens OX=9606 GN=GTPBP6 PE=1 SV=4	GTPBP6	56.897	8.1	8	3	3	3	1	2	1	1	1	2	2	2	1	1	1	2	2	2	1	1	1	2	2	2	1	1	1	2	16351	1404.7	859.15	438.06	1113.9	3514.4	354620	85873	0	0	0	0	1.6101	0.389895
O43826	Glucose-6-phosphate exchanger SLC37A4 OS=Homo sapiens OX=9606 GN=SLC37A4 PE=1 SV=1	SLC37A4	46.36	6.5	7	2	2	2	0	2	0	1	2	2	1	2	1	1	2	2	1	2	1	1	2	2	1	2	1	1	2	2	4633.4	2090.3	1225.3	1477.5	5923.1	5661.8	0	19078	0	0	51971	53319		0.460199			1.25364
O43837	Isocitrate dehydrogenase [NAD] subunit beta, mitochondrial OS=Homo sapiens OX=9606 GN=IDH3B PE=1 SV=2	IDH3B	42.183	39.7	79	12	12	12	13	13	13	13	12	15	11	11	12	12	12	12	11	11	12	12	12	12	11	11	12	12	12	12	127800	130880	112630	130090	121680	106310	592610	565560	545160	611380	519810	502640	1.06547	1.01684	0.980163	1.09922	0.934585
O43847	Nardilysin OS=Homo sapiens OX=9606 GN=NRDC PE=1 SV=3	NRDC	131.7	26	123	26	26	26	19	20	26	13	21	24	22	25	26	23	22	25	22	25	26	23	22	25	22	25	26	23	22	25	31646	44681	41929	29970	35529	42562	188580	259430	261620	185410	254100	276190	0.793837	1.09208	1.1013	0.780493	1.06965
O43852	Calumenin OS=Homo sapiens OX=9606 GN=CALU PE=1 SV=2	CALU	37.106	64.4	140	15	15	15	22	24	26	22	21	25	15	15	15	15	15	15	15	15	15	15	15	15	15	15	15	15	15	15	954230	870780	837600	846520	838680	836300	1665800	1437900	1479600	1456300	1351600	1447500	1.1308	0.976094	1.0044	0.988584	0.91751
O43854	EGF-like repeat and discoidin I-like domain-containing protein 3 OS=Homo sapiens OX=9606 GN=EDIL3 PE=1 SV=1	EDIL3	53.764	7.7	6	3	3	3	0	1	1	0	1	3	0	2	2	0	2	3	0	2	2	0	2	3	0	2	2	0	2	3		2482.4	2884.5		3525.4	5744.4	0	36263	37871	0	43407	60290		0.815673	0.851842		0.976365
O43865	S-adenosylhomocysteine hydrolase-like protein 1 OS=Homo sapiens OX=9606 GN=AHCYL1 PE=1 SV=2	AHCYL1	58.951	37	34	15	6	15	5	4	5	7	8	5	11	13	10	12	11	8	4	5	4	5	5	2	11	13	10	12	11	8	51848	91523	31626	108360	75729	61975	598750	688600	566020	831850	728000	656570	0.882724	1.01519	0.834471	1.22638	1.07327
O43896	Kinesin-like protein KIF1C OS=Homo sapiens OX=9606 GN=KIF1C PE=1 SV=3	KIF1C	122.95	6.1	11	5	3	3	3	1	2	2	2	1	5	5	5	4	4	4	3	3	3	2	2	2	3	3	3	2	2	2	911.66	615.92	677.78	587.51	581.06	480.03	24964	15339	18235	21157	20020	17247	1.28062	0.786871	0.935432	1.08533	1.027
O43913	Origin recognition complex subunit 5 OS=Homo sapiens OX=9606 GN=ORC5 PE=1 SV=1	ORC5	50.282	12.4	20	5	5	5	3	3	3	3	4	4	4	4	5	4	5	4	4	4	5	4	5	4	4	4	5	4	5	4	6253.1	5519.9	5438.7	4620.8	5617.3	4625.1	49197	46678	47320	40296	46996	45009	1.07146	1.0166	1.03058	0.877603	1.02352
O43920	NADH dehydrogenase [ubiquinone] iron-sulfur protein 5 OS=Homo sapiens OX=9606 GN=NDUFS5 PE=1 SV=3	NDUFS5	12.517	48.1	16	5	5	5	2	4	3	1	4	2	5	5	5	5	5	4	5	5	5	5	5	4	5	5	5	5	5	4	221800	188030	157390	204880	174680	141920	758620	639900	575070	699570	571850	584650	1.18854	1.00254	0.900973	1.09603	0.895928
O43924	Retinal rod rhodopsin-sensitive cGMP 3',5'-cyclic phosphodiesterase subunit delta OS=Homo sapiens OX=9606 GN=PDE6D PE=1 SV=1	PDE6D	17.42	17.3	14	2	2	2	3	2	3	3	2	1	2	2	2	2	2	2	2	2	2	2	2	2	2	2	2	2	2	2	33136	30441	29771	34408	30255	30062	88317	76697	83863	93866	77948	87681	1.04235	0.905207	0.989783	1.10784	0.919972
O43933	Peroxisome biogenesis factor 1 OS=Homo sapiens OX=9606 GN=PEX1 PE=1 SV=1	PEX1	142.87	7.8	19	9	9	9	7	2	2	6	2	0	8	5	3	7	3	0	8	5	3	7	3	0	8	5	3	7	3	0	2592.3	1086.9	785.25	3817.5	764.55		52946	28270	29065	57060	27509	0	1.35864	0.72543	0.74583	1.4642	0.705902
O60216	Double-strand-break repair protein rad21 homolog OS=Homo sapiens OX=9606 GN=RAD21 PE=1 SV=2	RAD21	71.689	34.7	60	16	16	16	8	12	8	10	12	10	13	13	14	12	14	14	13	13	14	12	14	14	13	13	14	12	14	14	23217	35641	32320	29375	37115	31956	125620	141680	149600	134270	155080	164790	0.86531	0.975937	1.03049	0.924894	1.06824
O60218	Aldo-keto reductase family 1 member B10 OS=Homo sapiens OX=9606 GN=AKR1B10 PE=1 SV=2	AKR1B10	36.019	15.2	12	4	2	4	3	3	2	2	0	2	4	4	2	3	3	2	2	2	0	1	1	0	4	4	2	3	3	2	4816.3	26096	18834	4839.2	25179	23789	295370	342740	332390	281720	197250	428170	0.943855	1.09523	1.06215	0.900236	0.630313
O60220	Mitochondrial import inner membrane translocase subunit Tim8 A OS=Homo sapiens OX=9606 GN=TIMM8A PE=1 SV=1	TIMM8A	10.998	49.5	25	4	4	4	4	4	4	5	4	4	4	4	4	4	4	4	4	4	4	4	4	4	4	4	4	4	4	4	264430	224220	211290	244060	214600	194610	461610	370310	381780	430010	357850	362730	1.17145	0.939758	0.968866	1.09126	0.908137
O60229	Kalirin OS=Homo sapiens OX=9606 GN=KALRN PE=1 SV=3	KALRN	340.26	0.9	5	2	2	2	0	1	0	2	1	1	1	1	0	2	1	1	1	1	0	2	1	1	1	1	0	2	1	1	26.42	114.29		157.63	186.97	122.96	0	0	0	0	0	0
O60231	Pre-mRNA-splicing factor ATP-dependent RNA helicase DHX16 OS=Homo sapiens OX=9606 GN=DHX16 PE=1 SV=2	DHX16	119.26	17.3	58	13	12	12	8	10	12	9	12	7	11	10	12	10	13	9	10	9	11	9	12	8	10	9	11	9	12	8	6968.6	6216.8	7229	6314.2	6919.5	5817.5	67059	67839	71082	63120	71494	73223	0.972299	0.983609	1.03063	0.915187	1.0366
O60232	Protein ZNRD2 OS=Homo sapiens OX=9606 GN=ZNRD2 PE=1 SV=1	ZNRD2	21.474	49.2	44	6	6	6	8	8	6	6	8	8	6	5	5	6	6	6	6	5	5	6	6	6	6	5	5	6	6	6	177550	160370	159210	170910	167430	161740	526670	442960	465370	491400	428290	443130	1.12946	0.94994	0.997998	1.05382	0.918479
O60238	BCL2/adenovirus E1B 19 kDa protein-interacting protein 3-like OS=Homo sapiens OX=9606 GN=BNIP3L PE=1 SV=1	BNIP3L	23.93	13.7	17	2	2	2	3	3	2	3	3	3	2	2	2	2	2	2	2	2	2	2	2	2	2	2	2	2	2	2	7318	5166.4	4367.8	7137.3	6490.9	8546.6	26091	18000	16266	26897	22926	33876	1.0867	0.749708	0.677487	1.12027	0.954879
O60244	Mediator of RNA polymerase II transcription subunit 14 OS=Homo sapiens OX=9606 GN=MED14 PE=1 SV=2	MED14	160.6	4.6	22	7	7	7	3	3	4	3	3	6	4	6	5	5	6	6	4	6	5	5	6	6	4	6	5	5	6	6	1254.3	2203.2	1710.4	1538	2301.1	1791	32062	41304	40277	34257	41481	38745	0.843271	1.08635	1.05934	0.901002	1.091
O60245	Protocadherin-7 OS=Homo sapiens OX=9606 GN=PCDH7 PE=1 SV=2	PCDH7	116.07	3	8	2	2	2	1	1	3	1	1	1	2	1	2	1	1	2	2	1	2	1	1	2	2	1	2	1	1	2	551.83	500.26	1187.9	309.17	411.1	1607.7	25414	0	41822	0	0	41148	0.703443		1.15761
O60256	Phosphoribosyl pyrophosphate synthase-associated protein 2 OS=Homo sapiens OX=9606 GN=PRPSAP2 PE=1 SV=1	PRPSAP2	40.925	47.4	89	13	12	13	14	16	15	16	15	13	13	13	13	13	13	12	12	12	12	12	12	11	13	13	13	13	13	12	73141	74153	68374	72373	67670	58405	277430	256810	264210	278120	251790	245740	1.05748	0.978883	1.00709	1.06011	0.959748
O60262	Guanine nucleotide-binding protein G(I)/G(S)/G(O) subunit gamma-7 OS=Homo sapiens OX=9606 GN=GNG7 PE=1 SV=1	GNG7	7.5217	20.6	2	1	1	1	1	0	0	1	0	0	1	0	0	1	0	0	1	0	0	1	0	0	1	0	0	1	0	0	1167.4			1851.8			0	0	0	0	0	0
O60264	SWI/SNF-related matrix-associated actin-dependent regulator of chromatin subfamily A member 5 OS=Homo sapiens OX=9606 GN=SMARCA5 PE=1 SV=1	SMARCA5	121.9	27.9	116	29	21	29	15	23	21	18	20	19	22	27	26	25	27	25	19	20	20	20	20	19	22	27	26	25	27	25	49322	121280	62677	119170	132190	107860	1992500	2312900	2286800	2190900	2311500	2394000	0.886304	1.02882	1.01721	0.974556	1.0282
O60271	C-Jun-amino-terminal kinase-interacting protein 4 OS=Homo sapiens OX=9606 GN=SPAG9 PE=1 SV=4	SPAG9	146.2	42.3	180	37	37	37	30	29	27	34	28	32	32	34	32	35	31	33	32	34	32	35	31	33	32	34	32	35	31	33	54770	54809	51701	62212	49328	52232	325490	263330	288160	278350	254170	277090	1.15792	0.93679	1.02512	0.990223	0.904203
O60287	Nucleolar pre-ribosomal-associated protein 1 OS=Homo sapiens OX=9606 GN=URB1 PE=1 SV=4	URB1	254.39	14.4	83	22	22	22	13	15	17	14	14	10	19	20	20	19	20	20	19	20	20	19	20	20	19	20	20	19	20	20	3583.6	3975.8	3612.1	3445.7	4421.9	3579.4	71506	74537	69577	62182	73447	65387	1.02976	1.07341	1.00198	0.895487	1.05771
O60291	E3 ubiquitin-protein ligase MGRN1 OS=Homo sapiens OX=9606 GN=MGRN1 PE=1 SV=2	MGRN1	60.752	2.2	6	1	1	1	1	1	1	1	1	1	1	1	1	1	1	1	1	1	1	1	1	1	1	1	1	1	1	1	797.98	816.27	661.36	790.95	923.76	883.95	0	0	0	0	0	0
O60292	Signal-induced proliferation-associated 1-like protein 3 OS=Homo sapiens OX=9606 GN=SIPA1L3 PE=1 SV=3	SIPA1L3	194.61	1	1	1	1	1	0	0	0	1	0	0	0	0	0	1	0	1	0	0	0	1	0	1	0	0	0	1	0	1				40.759		47.433	0	0	0	0	0	0
O60306	RNA helicase aquarius OS=Homo sapiens OX=9606 GN=AQR PE=1 SV=4	AQR	171.29	13.5	51	14	14	14	7	10	12	6	9	7	11	14	13	10	13	12	11	14	13	10	13	12	11	14	13	10	13	12	3728.6	6451.1	5543.5	3865	6380.3	5885.2	36412	52299	51273	39721	52949	51866	0.767862	1.10289	1.08125	0.837642	1.1166
O60313	Dynamin-like 120 kDa protein, mitochondrial OS=Homo sapiens OX=9606 GN=OPA1 PE=1 SV=3	OPA1	111.63	24	99	19	19	19	16	18	16	20	15	14	16	17	18	18	17	17	16	17	18	18	17	17	16	17	18	18	17	17	35454	35702	31912	36773	32025	31429	240280	207250	212210	242760	210390	208630	1.09093	0.940962	0.963481	1.10218	0.955218
O60318	Germinal-center associated nuclear protein OS=Homo sapiens OX=9606 GN=MCM3AP PE=1 SV=2	MCM3AP	218.4	3.2	17	4	4	4	3	2	3	4	3	2	3	3	3	3	3	2	3	3	3	3	3	2	3	3	3	3	3	2	860.23	643.81	758.39	1034.4	1000.4	498.02	26245	21973	21805	31387	26028	0	1.02972	0.862105	0.855514	1.23146	1.0212
O60331	Phosphatidylinositol 4-phosphate 5-kinase type-1 gamma OS=Homo sapiens OX=9606 GN=PIP5K1C PE=1 SV=2	PIP5K1C	73.259	4.8	6	2	1	1	1	1	1	1	1	1	2	2	2	2	2	2	1	1	1	1	1	1	1	1	1	1	1	1	296.28	295.7	142.89	399.72	501.99	336.29	0	0	0	0	0	0
O60333	Kinesin-like protein KIF1B OS=Homo sapiens OX=9606 GN=KIF1B PE=1 SV=5	KIF1B	204.47	4.7	20	6	4	6	3	5	3	3	3	3	5	6	6	5	5	6	3	4	4	3	3	4	5	6	6	5	5	6	1391.9	1864	1790	1800.1	1520.8	1878.2	53213	54162	57010	66943	54560	63754	0.913157	0.929442	0.978315	1.14877	0.936272
O60341	Lysine-specific histone demethylase 1A OS=Homo sapiens OX=9606 GN=KDM1A PE=1 SV=2	KDM1A	92.902	25.8	70	16	16	16	10	14	14	8	12	12	14	16	16	14	15	16	14	16	16	14	15	16	14	16	16	14	15	16	18960	24820	24062	24019	26498	28260	137490	160320	168900	164140	176750	204420	0.815142	0.950495	1.00136	0.973143	1.0479
O60343	TBC1 domain family member 4 OS=Homo sapiens OX=9606 GN=TBC1D4 PE=1 SV=2	TBC1D4	146.56	6.8	20	7	6	6	3	3	1	6	4	3	5	5	5	7	6	6	4	4	5	6	5	5	4	4	5	6	5	5	1671.2	1817.5	1845.2	2052.6	2348.6	2007.9	32231	33998	28957	30626	33886	33567	1.00063	1.05548	0.898983	0.950798	1.05201
O60353	Frizzled-6 OS=Homo sapiens OX=9606 GN=FZD6 PE=1 SV=2	FZD6	79.291	4.4	11	2	2	2	1	2	2	2	2	2	2	2	2	2	2	2	2	2	2	2	2	2	2	2	2	2	2	2	1111.8	1554.3	1274.2	1658.7	1698.5	1124.6	20002	26798	23373	29926	29491	21428	0.794687	1.06469	0.928618	1.18897	1.17169
O60361	Putative nucleoside diphosphate kinase OS=Homo sapiens OX=9606 GN=NME2P1 PE=5 SV=1	NME2P1	15.529	66.4	2	10	1	1	0	0	0	1	0	1	9	10	10	9	9	10	1	1	1	1	1	1	1	1	1	1	1	1	70197	78284	81362	61200	72923	84258	0	0	0	0	0	0
O60427	Acyl-CoA (8-3)-desaturase OS=Homo sapiens OX=9606 GN=FADS1 PE=1 SV=3	FADS1	51.964	18.7	16	5	4	5	2	2	5	2	3	2	1	3	4	1	3	2	1	3	4	1	3	2	1	3	4	1	3	2	856.34	2676.9	4130.8	895.03	2436.3	2451.7	9882.3	20798	27389	10513	18829	20827	0.547808	1.1529	1.51826	0.58277	1.04375
O60437	Periplakin OS=Homo sapiens OX=9606 GN=PPL PE=1 SV=4	PPL	204.74	37.6	199	49	49	49	33	40	33	37	33	23	44	45	43	41	40	38	44	45	43	41	40	38	44	45	43	41	40	38	29255	31162	26022	31217	26947	19618	437960	442220	377240	498660	414930	323640	1.05336	1.0636	0.907318	1.19935	0.997968
O60476	Mannosyl-oligosaccharide 1,2-alpha-mannosidase IB OS=Homo sapiens OX=9606 GN=MAN1A2 PE=1 SV=1	MAN1A2	73.003	2.7	3	1	1	1	0	0	1	1	0	1	0	1	1	1	1	1	0	1	1	1	1	1	0	1	1	1	1	1		707.5	584.01	751.27	456.94	634.52	0	0	0	0	0	0
O60487	Myelin protein zero-like protein 2 OS=Homo sapiens OX=9606 GN=MPZL2 PE=1 SV=1	MPZL2	24.484	10.2	8	2	2	2	1	1	1	2	1	2	2	2	2	2	1	2	2	2	2	2	1	2	2	2	2	2	1	2	2027.8	13191	11548	4722	4530.4	6880.3	13526	86379	57353	33883	0	51377	0.278866	1.78088	1.18245	0.698567
O60488	Long-chain-fatty-acid--CoA ligase 4 OS=Homo sapiens OX=9606 GN=ACSL4 PE=1 SV=2	ACSL4	79.187	49.8	148	27	26	27	27	26	28	21	24	22	24	25	25	25	24	26	23	24	24	24	23	25	24	25	25	25	24	26	189730	190270	201820	185330	165650	174040	1679100	1422300	1584300	1535300	1288800	1429300	1.12703	0.95466	1.0634	1.03051	0.865054
O60493	Sorting nexin-3 OS=Homo sapiens OX=9606 GN=SNX3 PE=1 SV=3	SNX3	18.762	49.4	25	7	5	7	2	5	5	4	5	4	6	7	6	7	7	7	4	5	4	5	5	5	6	7	6	7	7	7	54757	75715	59446	54188	67407	68747	165150	185650	176520	153370	173260	182960	0.955628	1.07425	1.02142	0.887464	1.00256
O60499	Syntaxin-10 OS=Homo sapiens OX=9606 GN=STX10 PE=1 SV=1	STX10	28.114	20.1	9	4	4	4	0	2	1	1	1	4	3	4	3	4	4	4	3	4	3	4	4	4	3	4	3	4	4	4	20460	20344	18356	19687	23313	20983	110470	100860	108260	101950	109940	107550	1.03723	0.946998	1.01648	0.957232	1.03225
O60502	Protein O-GlcNAcase OS=Homo sapiens OX=9606 GN=OGA PE=1 SV=2	OGA	102.91	38.2	129	26	26	26	27	20	22	23	21	16	25	24	22	22	24	21	25	24	22	22	24	21	25	24	22	22	24	21	45432	47174	36471	41665	48793	36488	345090	286070	306400	324950	293110	286790	1.12382	0.931617	0.997824	1.05823	0.954543
O60506	Heterogeneous nuclear ribonucleoprotein Q OS=Homo sapiens OX=9606 GN=SYNCRIP PE=1 SV=2	SYNCRIP	69.602	47.7	129	25	20	20	23	21	21	23	22	19	24	25	25	23	24	23	20	20	20	19	20	19	20	20	20	19	20	19	293940	273430	264480	292190	270900	250110	1551300	1386800	1453400	1564700	1389600	1398900	1.06439	0.951525	0.997221	1.07359	0.953446
O60507	Protein-tyrosine sulfotransferase 1 OS=Homo sapiens OX=9606 GN=TPST1 PE=1 SV=1	TPST1	42.188	21.9	22	6	6	6	2	5	3	2	6	4	2	6	4	4	6	4	2	6	4	4	6	4	2	6	4	4	6	4	1164.3	5398.1	2882.4	1845.1	5874.7	3852.5	12175	26454	19719	12756	29254	26126	0.577543	1.25489	0.935407	0.605104	1.38772
O60508	Pre-mRNA-processing factor 17 OS=Homo sapiens OX=9606 GN=CDC40 PE=1 SV=1	CDC40	65.521	13.3	22	5	5	5	4	4	4	3	4	3	4	5	5	4	5	4	4	5	5	4	5	4	4	5	5	4	5	4	12901	16688	13795	13048	17724	11725	234560	271260	290010	264350	305740	272340	0.859058	0.993469	1.06214	0.968161	1.11975
O60518	Ran-binding protein 6 OS=Homo sapiens OX=9606 GN=RANBP6 PE=1 SV=2	RANBP6	124.71	7.1	12	6	4	4	1	3	2	2	2	2	4	6	4	4	4	5	2	4	2	2	3	3	2	4	2	2	3	3	340.02	1351.8	651.2	515.28	1172.7	1157.3	21943	26935	26972	20443	22051	27126	0.905053	1.11095	1.11248	0.843184	0.909507
O60524	Nuclear export mediator factor NEMF OS=Homo sapiens OX=9606 GN=NEMF PE=1 SV=4	NEMF	122.95	11.1	26	8	8	8	4	4	4	6	4	4	5	6	5	6	5	8	5	6	5	6	5	8	5	6	5	6	5	8	1700.7	3944.6	1920.8	3775.1	3906.3	6265.4	72119	80180	85506	76594	82485	82244	0.903128	1.00407	1.07077	0.959167	1.03294
O60547	GDP-mannose 4,6 dehydratase OS=Homo sapiens OX=9606 GN=GMDS PE=1 SV=1	GMDS	41.949	33.6	43	10	10	10	7	5	9	6	8	8	8	9	10	9	10	10	8	9	10	9	10	10	8	9	10	9	10	10	23558	22996	23502	26355	25051	21316	165110	136490	129780	180440	125210	129070	1.14382	0.945549	0.899065	1.25002	0.867406
O60551	Glycylpeptide N-tetradecanoyltransferase 2 OS=Homo sapiens OX=9606 GN=NMT2 PE=1 SV=1	NMT2	56.98	15.3	3	5	2	2	1	0	0	1	0	1	5	3	3	4	4	4	2	0	0	1	1	1	2	0	0	1	1	1	2135.2			2557.9	55.429	2201.2	0	0	0	0	0	0
O60563	Cyclin-T1 OS=Homo sapiens OX=9606 GN=CCNT1 PE=1 SV=1	CCNT1	80.684	5.4	8	3	3	3	1	2	1	1	2	1	2	2	2	2	3	2	2	2	2	2	3	2	2	2	2	2	3	2	19910	21368	20153	21609	23418	20004	540990	519460	525590	541980	539980	545720	1.01003	0.969829	0.981274	1.01187	1.00814
O60566	Mitotic checkpoint serine/threonine-protein kinase BUB1 beta OS=Homo sapiens OX=9606 GN=BUB1B PE=1 SV=3	BUB1B	119.54	9.1	10	6	6	6	0	4	1	0	2	3	0	5	2	0	5	4	0	5	2	0	5	4	0	5	2	0	5	4		1039.1	840.12		1690.3	876.3	0	31990	40269	0	44837	29918		0.870393	1.09565		1.21994
O60568	Multifunctional procollagen lysine hydroxylase and glycosyltransferase LH3 OS=Homo sapiens OX=9606 GN=PLOD3 PE=1 SV=1	PLOD3	84.784	39.3	111	20	20	20	19	18	18	18	19	19	19	19	20	19	19	19	19	19	20	19	19	19	19	19	20	19	19	19	58445	49371	46825	54266	53850	49454	309380	246280	241440	293060	264570	255650	1.1527	0.917597	0.899564	1.09189	0.985742
O60573	Eukaryotic translation initiation factor 4E type 2 OS=Homo sapiens OX=9606 GN=EIF4E2 PE=1 SV=1	EIF4E2	28.362	41.2	36	9	9	9	6	6	6	8	5	5	9	8	8	9	8	8	9	8	8	9	8	8	9	8	8	9	8	8	44573	46728	45166	46253	49298	39677	337830	367110	342530	353260	368200	357330	0.953308	1.03593	0.96657	0.996849	1.03901
O60583	Cyclin-T2 OS=Homo sapiens OX=9606 GN=CCNT2 PE=1 SV=2	CCNT2	81.028	4.2	5	2	2	2	1	1	0	2	1	0	1	1	1	2	1	1	1	1	1	2	1	1	1	1	1	2	1	1	328.41	307.77	169.44	601.12	265.58	205.28	0	0	0	0	0	0
O60610	Protein diaphanous homolog 1 OS=Homo sapiens OX=9606 GN=DIAPH1 PE=1 SV=2	DIAPH1	141.35	32.9	189	35	35	35	29	34	35	32	32	27	33	34	34	31	33	30	33	34	34	31	33	30	33	34	34	31	33	30	76676	86262	83129	73398	74449	66726	395520	391480	420920	373740	355470	362890	1.03178	1.02124	1.09804	0.974965	0.927305
O60613	Selenoprotein F OS=Homo sapiens OX=9606 GN=SELENOF PE=1 SV=4	SELENOF	18.092	15.2	2	2	2	2	0	1	0	1	0	0	2	2	2	1	1	1	2	2	2	1	1	1	2	2	2	1	1	1	5494.7	4111.7	4638.9	3661.8	2046.9	1964.5	0	0	0	0	0	0
O60637	Tetraspanin-3 OS=Homo sapiens OX=9606 GN=TSPAN3 PE=2 SV=1	TSPAN3	28.017	6.3	5	1	1	1	1	1	0	1	1	1	1	1	1	1	1	1	1	1	1	1	1	1	1	1	1	1	1	1	10560	26712	25114	6926.2	23694	17487	0	0	0	0	0	0
O60645	Exocyst complex component 3 OS=Homo sapiens OX=9606 GN=EXOC3 PE=1 SV=3	EXOC3	85.566	17.7	40	8	8	8	7	6	8	6	7	6	8	8	8	8	8	8	8	8	8	8	8	8	8	8	8	8	8	8	13225	14482	12022	12697	13436	11483	121300	132250	117220	127010	120830	117690	0.988456	1.07769	0.955208	1.03499	0.984626
O60664	Perilipin-3 OS=Homo sapiens OX=9606 GN=PLIN3 PE=1 SV=3	PLIN3	47.074	66.1	167	19	19	19	26	29	31	27	26	28	18	19	19	19	18	19	18	19	19	19	18	19	18	19	19	19	18	19	750230	666930	686380	673280	619830	655460	2432700	2009300	2171600	2157700	1907700	2122100	1.14023	0.941778	1.01785	1.01134	0.894158
O60678	Protein arginine N-methyltransferase 3 OS=Homo sapiens OX=9606 GN=PRMT3 PE=1 SV=4	PRMT3	59.902	29.6	57	12	12	12	10	7	10	10	10	10	11	9	10	9	12	11	11	9	10	9	12	11	11	9	10	9	12	11	26453	17002	22609	21329	23761	21910	125080	90724	116890	109980	87490	108060	1.17589	0.852904	1.09889	1.03393	0.822501
O60683	Peroxisome biogenesis factor 10 OS=Homo sapiens OX=9606 GN=PEX10 PE=1 SV=1	PEX10	37.069	12.9	7	2	2	2	2	1	1	2	1	0	2	1	1	2	1	1	2	1	1	2	1	1	2	1	1	2	1	1	2344.7	774.31	725.6	2112.3	520.44	473.08	21863	0	0	19273	0	0	1.06296			0.937038
O60684	Importin subunit alpha-7 OS=Homo sapiens OX=9606 GN=KPNA6 PE=1 SV=1	KPNA6	60.029	30.4	37	14	7	7	6	5	9	5	5	7	12	13	12	13	12	12	7	7	7	7	6	6	7	7	7	7	6	6	43879	44493	45543	37765	44072	41533	271850	290820	289990	243180	302810	317560	0.950408	1.01673	1.01383	0.850176	1.05865
O60701	UDP-glucose 6-dehydrogenase OS=Homo sapiens OX=9606 GN=UGDH PE=1 SV=1	UGDH	55.023	77.1	195	28	28	28	32	34	32	32	33	32	26	28	28	27	28	25	26	28	28	27	28	25	26	28	28	27	28	25	587820	672290	609690	611600	638240	586030	1244000	1305300	1273800	1292600	1231300	1315700	0.974069	1.02207	0.997403	1.01212	0.964125
O60716	Catenin delta-1 OS=Homo sapiens OX=9606 GN=CTNND1 PE=1 SV=1	CTNND1	108.17	48.8	232	35	35	35	39	38	41	38	37	39	32	34	33	33	32	33	32	34	33	33	32	33	32	34	33	33	32	33	175550	196190	182830	204960	189570	189370	941150	900090	942220	1084000	899060	949390	0.987927	0.944826	0.98905	1.13788	0.943745
O60725	Protein-S-isoprenylcysteine O-methyltransferase OS=Homo sapiens OX=9606 GN=ICMT PE=1 SV=1	ICMT	31.938	12	6	2	2	2	1	1	0	2	1	1	2	1	1	2	2	1	2	1	1	2	2	1	2	1	1	2	2	1	9152.7	7013	5718.7	8876.3	7619.1	6670	80682	0	0	71580	54497	0	1.17067			1.0386	0.790732
O60739	Eukaryotic translation initiation factor 1b OS=Homo sapiens OX=9606 GN=EIF1B PE=1 SV=2	EIF1B	12.823	63.7	5	5	1	1	1	1	1	0	1	1	5	5	5	5	5	5	1	1	1	1	1	1	1	1	1	1	1	1	11353	12865	12234	11394	12557	12564	0	0	0	0	0	0
O60749	Sorting nexin-2 OS=Homo sapiens OX=9606 GN=SNX2 PE=1 SV=2	SNX2	58.47	29.3	67	14	12	14	11	11	11	10	13	11	14	13	11	11	13	11	12	11	10	10	11	10	14	13	11	11	13	11	67665	47760	40537	50390	45559	39674	225150	160750	171150	230270	155220	169280	1.21504	0.867497	0.923621	1.24266	0.837654
O60762	Dolichol-phosphate mannosyltransferase subunit 1 OS=Homo sapiens OX=9606 GN=DPM1 PE=1 SV=1	DPM1	29.634	38.1	55	9	9	9	9	10	10	10	9	7	9	9	9	9	9	8	9	9	9	9	9	8	9	9	9	9	9	8	83624	85953	75836	88650	79457	71938	257950	255290	240340	282340	238050	235150	1.02557	1.01499	0.95555	1.12254	0.946446
O60763	General vesicular transport factor p115 OS=Homo sapiens OX=9606 GN=USO1 PE=1 SV=2	USO1	107.89	40.1	155	27	27	27	28	22	26	28	26	25	27	27	25	27	27	27	27	27	25	27	27	27	27	27	25	27	27	27	125650	106290	97010	123750	108040	93107	418420	338570	348940	423240	341770	346390	1.13223	0.916156	0.944217	1.14527	0.924815
O60783	28S ribosomal protein S14, mitochondrial OS=Homo sapiens OX=9606 GN=MRPS14 PE=1 SV=1	MRPS14	15.139	21.9	17	2	2	2	3	2	3	3	3	3	2	2	2	2	2	2	2	2	2	2	2	2	2	2	2	2	2	2	23612	17780	19362	21624	21393	20287	81565	78312	67865	76751	71986	77366	1.07832	1.03531	0.897201	1.01468	0.951682
O60784	Target of Myb protein 1 OS=Homo sapiens OX=9606 GN=TOM1 PE=1 SV=2	TOM1	53.818	35	50	10	10	10	10	8	7	10	8	7	10	9	9	10	9	8	10	9	9	10	9	8	10	9	9	10	9	8	60448	56288	52504	67084	55990	48705	289460	267750	252670	310570	247600	234220	1.08394	1.00264	0.94617	1.16299	0.927185
Q99880	Histone H2B type 1-L OS=Homo sapiens OX=9606 GN=H2BC13 PE=1 SV=3	H2BC13	13.952	41.3	73	6	2	6	12	10	14	15	11	11	5	5	6	5	5	5	2	2	2	2	2	2	5	5	6	5	5	5	4767400	4418400	4828200	5360400	4515100	4922500	12341000	10660000	12306000	14609000	10828000	12879000	1.00574	0.86875	1.00289	1.19058	0.882442
O60825	6-phosphofructo-2-kinase/fructose-2,6-bisphosphatase 2 OS=Homo sapiens OX=9606 GN=PFKFB2 PE=1 SV=2	PFKFB2	58.476	28.9	40	13	9	13	8	7	7	6	6	6	10	12	11	10	8	10	6	8	8	6	5	6	10	12	11	10	8	10	18746	23427	22122	16468	18057	23766	224100	232460	244140	173510	207320	225510	1.02874	1.06711	1.12073	0.796502	0.951708
O60826	Coiled-coil domain-containing protein 22 OS=Homo sapiens OX=9606 GN=CCDC22 PE=1 SV=1	CCDC22	70.755	23.1	41	9	9	9	7	7	7	8	7	5	8	9	9	9	9	9	8	9	9	9	9	9	8	9	9	9	9	9	12798	12936	12306	13664	12978	11881	127640	113500	116940	128090	119800	120740	1.05384	0.9371	0.965502	1.05756	0.989115
O60828	Polyglutamine-binding protein 1 OS=Homo sapiens OX=9606 GN=PQBP1 PE=1 SV=1	PQBP1	30.472	25.7	23	4	4	4	3	4	4	3	4	5	4	4	4	4	4	4	4	4	4	4	4	4	4	4	4	4	4	4	27049	35755	34722	23839	33274	35221	101050	109300	117310	79258	109340	110930	0.966696	1.04562	1.12225	0.758222	1.046
O60830	Mitochondrial import inner membrane translocase subunit Tim17-B OS=Homo sapiens OX=9606 GN=TIMM17B PE=1 SV=1	TIMM17B	18.273	21.5	10	3	3	3	2	2	1	2	1	2	2	3	3	2	3	3	2	3	3	2	3	3	2	3	3	2	3	3	74591	15242	8261.5	6541.3	14576	7577.9	445900	141090	56028	74016	109400	72563	2.97598	0.941649	0.373937	0.493991	0.730147
O60831	PRA1 family protein 2 OS=Homo sapiens OX=9606 GN=PRAF2 PE=1 SV=1	PRAF2	19.258	22.5	13	3	3	3	2	2	3	2	2	2	2	2	3	2	2	2	2	2	3	2	2	2	2	2	3	2	2	2	54636	37716	36915	45743	21591	14878	203840	135880	93684	157160	184310	125310	1.35866	0.905682	0.624432	1.04752	1.22848
O60832	H/ACA ribonucleoprotein complex subunit DKC1 OS=Homo sapiens OX=9606 GN=DKC1 PE=1 SV=3	DKC1	57.673	47.7	109	20	20	20	17	17	18	20	19	18	18	18	18	19	17	18	18	18	18	19	17	18	18	18	18	19	17	18	109100	100830	92922	118180	102440	86703	731510	634850	616950	740690	646890	604440	1.10407	0.958185	0.931168	1.11793	0.976357
O60841	Eukaryotic translation initiation factor 5B OS=Homo sapiens OX=9606 GN=EIF5B PE=1 SV=4	EIF5B	138.83	27.2	148	25	25	25	26	26	25	28	23	20	22	23	23	23	23	20	22	23	23	23	23	20	22	23	23	23	23	20	85696	80568	75351	86338	76635	66631	529850	473570	474460	502090	443620	438060	1.11093	0.992931	0.994797	1.05273	0.930135
O60869	Endothelial differentiation-related factor 1 OS=Homo sapiens OX=9606 GN=EDF1 PE=1 SV=1	EDF1	16.368	38.5	24	5	5	5	4	5	5	3	4	3	4	5	5	4	5	3	4	5	5	4	5	3	4	5	5	4	5	3	102190	110640	111050	100020	108440	83189	341110	365000	395510	353490	372190	406950	0.916039	0.980195	1.06213	0.949285	0.999503
O60870	DNA/RNA-binding protein KIN17 OS=Homo sapiens OX=9606 GN=KIN PE=1 SV=2	KIN	45.373	3.6	4	2	2	2	1	0	1	0	0	2	1	2	2	0	2	2	1	2	2	0	2	2	1	2	2	0	2	2	1261.3	10984	10339		11653	10953	0	235590	241300	0	242780	242290		0.979625	1.00337		1.00952
O60879	Protein diaphanous homolog 2 OS=Homo sapiens OX=9606 GN=DIAPH2 PE=1 SV=1	DIAPH2	125.57	14.7	40	10	10	10	7	6	7	9	6	5	10	8	7	10	6	8	10	8	7	10	6	8	10	8	7	10	6	8	4656	3038.2	3034.1	4273.6	2544.4	3231.7	57146	39977	47424	49832	39879	45758	1.22449	0.856601	1.01617	1.06777	0.854501
O60884	DnaJ homolog subfamily A member 2 OS=Homo sapiens OX=9606 GN=DNAJA2 PE=1 SV=1	DNAJA2	45.745	47.6	63	15	15	15	9	13	10	11	11	9	14	15	12	13	15	12	14	15	12	13	15	12	14	15	12	13	15	12	125900	132480	112890	128010	138400	107620	623770	663920	650390	665440	681200	654350	0.950128	1.01128	0.990675	1.0136	1.03761
O60885	Bromodomain-containing protein 4 OS=Homo sapiens OX=9606 GN=BRD4 PE=1 SV=2	BRD4	152.22	8.4	32	10	6	10	5	5	4	5	7	6	8	8	8	8	10	9	5	5	5	4	6	6	8	8	8	8	10	9	6185.7	7107.4	6596.2	6423.7	8282.6	7639.9	126780	129110	119400	141560	143360	154420	0.933774	0.950935	0.879418	1.04263	1.05589
O60888	Protein CutA OS=Homo sapiens OX=9606 GN=CUTA PE=1 SV=2	CUTA	19.116	33	18	3	3	3	3	3	3	3	3	3	3	3	3	3	3	3	3	3	3	3	3	3	3	3	3	3	3	3	129630	106010	106850	115850	111640	110610	574700	438100	451700	479010	462500	447170	1.20855	0.921288	0.949887	1.00732	0.972599
O60907	F-box-like/WD repeat-containing protein TBL1X OS=Homo sapiens OX=9606 GN=TBL1X PE=1 SV=3	TBL1X	62.495	22	9	8	2	2	2	1	2	2	1	1	6	7	6	8	8	7	2	2	2	2	2	2	2	2	2	2	2	2	1478.2	881.94	960.51	1588.2	690.53	962.71	25835	11834	11469	27573	10089	11550	1.57611	0.721952	0.699685	1.68213	0.615496
O60921	Checkpoint protein HUS1 OS=Homo sapiens OX=9606 GN=HUS1 PE=1 SV=1	HUS1	31.691	32.5	18	7	7	7	2	3	4	2	4	3	6	4	6	3	6	4	6	4	6	3	6	4	6	4	6	3	6	4	5955.8	5432.3	6588	4203.8	7059.5	5250.4	20998	28171	24315	30256	27654	26582	0.797514	1.06995	0.923495	1.14914	1.05031
O60925	Prefoldin subunit 1 OS=Homo sapiens OX=9606 GN=PFDN1 PE=1 SV=2	PFDN1	14.21	36.9	20	3	3	3	3	3	4	3	3	4	3	3	3	3	3	3	3	3	3	3	3	3	3	3	3	3	3	3	109530	97546	96698	84708	102670	99870	389000	328950	330980	303060	350510	362420	1.13031	0.955824	0.961722	0.880596	1.01847
O60927	E3 ubiquitin-protein ligase PPP1R11 OS=Homo sapiens OX=9606 GN=PPP1R11 PE=1 SV=1	PPP1R11	13.952	19.8	13	3	3	3	4	2	1	2	1	3	3	3	2	3	3	3	3	3	2	3	3	3	3	3	2	3	3	3	22365	20109	17840	22261	20827	20749	76343	69109	67864	70323	66713	78243	1.06874	0.967473	0.950044	0.984468	0.933931
O60930	Ribonuclease H1 OS=Homo sapiens OX=9606 GN=RNASEH1 PE=1 SV=2	RNASEH1	32.064	15.4	9	3	3	3	2	1	3	0	2	1	2	2	3	2	2	3	2	2	3	2	2	3	2	2	3	2	2	3	2206.2	3175.1	2826.6	2325.6	4150.7	3329.5	19851	23512	18951	21252	35374	21870	0.845863	1.00186	0.807514	0.905561	1.50731
O60934	Nibrin OS=Homo sapiens OX=9606 GN=NBN PE=1 SV=1	NBN	84.958	23.2	43	11	11	11	7	9	7	6	6	8	10	11	10	9	9	9	10	11	10	9	9	9	10	11	10	9	9	9	6887.4	7180.5	8166.6	7321.6	6875.8	6802.6	56493	59858	72766	64564	65015	69878	0.872313	0.924272	1.12359	0.996938	1.0039
O60936	Nucleolar protein 3 OS=Homo sapiens OX=9606 GN=NOL3 PE=1 SV=2	NOL3	22.629	64.9	36	7	7	7	6	5	6	7	7	5	6	5	5	6	6	6	6	5	5	6	6	6	6	5	5	6	6	6	153900	109180	105980	127500	113790	102300	419730	369690	388290	453200	383100	391540	1.0469	0.922093	0.968485	1.13039	0.95554
O75027	Iron-sulfur clusters transporter ABCB7, mitochondrial OS=Homo sapiens OX=9606 GN=ABCB7 PE=1 SV=2	ABCB7	82.64	16.9	46	9	9	9	9	8	6	9	7	7	9	8	7	9	9	8	9	8	7	9	9	8	9	8	7	9	9	8	15181	21835	13082	17735	16195	14406	238300	214940	193030	262850	215410	239830	1.04796	0.945234	0.848882	1.15593	0.947301
O75044	SLIT-ROBO Rho GTPase-activating protein 2 OS=Homo sapiens OX=9606 GN=SRGAP2 PE=1 SV=3	SRGAP2	120.87	13.9	34	10	5	10	6	8	4	6	4	6	9	8	8	9	9	6	5	4	3	4	4	2	9	8	8	9	9	6	5089.7	4965.8	4731.5	5516.5	6041.8	3779.1	50514	48436	51271	46012	52482	53087	1.00425	0.962936	1.0193	0.914745	1.04337
O75052	Carboxyl-terminal PDZ ligand of neuronal nitric oxide synthase protein OS=Homo sapiens OX=9606 GN=NOS1AP PE=1 SV=3	NOS1AP	56.149	5.9	8	2	2	2	1	1	1	1	2	2	2	2	2	2	2	2	2	2	2	2	2	2	2	2	2	2	2	2	2079.6	3841.6	2807.9	2881.6	3751	2529.7	45667	53244	54501	45518	53785	58168	0.881367	1.0276	1.05186	0.878491	1.03804
O75071	EF-hand calcium-binding domain-containing protein 14 OS=Homo sapiens OX=9606 GN=EFCAB14 PE=1 SV=1	EFCAB14	55.031	3.4	2	1	1	1	1	0	0	1	0	0	1	1	1	1	1	1	1	1	1	1	1	1	1	1	1	1	1	1	2383.2	1950.5	1741.7	2328.7	1924.1	1943.3	0	0	0	0	0	0
O75083	WD repeat-containing protein 1 OS=Homo sapiens OX=9606 GN=WDR1 PE=1 SV=4	WDR1	66.193	61.2	206	26	26	26	37	35	34	30	34	36	26	26	25	26	25	26	26	26	25	26	25	26	26	26	25	26	25	26	960460	920230	907850	921730	899550	841250	3494100	3215000	3380900	3484500	3104300	3208100	1.05419	0.969985	1.02004	1.0513	0.936586
O75110	Probable phospholipid-transporting ATPase IIA OS=Homo sapiens OX=9606 GN=ATP9A PE=1 SV=3	ATP9A	118.58	3.4	3	3	3	3	2	0	1	0	0	0	3	0	2	2	2	2	3	0	2	2	2	2	3	0	2	2	2	2	1087.1		403.08	628.54	314.5	425.28	22380	0	16678	0	0	0	1.14599		0.854012
O75113	NEDD4-binding protein 1 OS=Homo sapiens OX=9606 GN=N4BP1 PE=1 SV=4	N4BP1	100.38	23.2	61	12	12	12	9	11	8	9	12	12	9	10	10	9	11	11	9	10	10	9	11	11	9	10	10	9	11	11	6844.1	8879.3	7507.5	7573.8	10348	9860.7	77845	101620	87333	91114	109510	105340	0.81547	1.06453	0.914862	0.95447	1.14718
O75116	Rho-associated protein kinase 2 OS=Homo sapiens OX=9606 GN=ROCK2 PE=1 SV=4	ROCK2	160.9	20.2	68	20	18	20	11	13	13	11	9	11	18	18	17	17	17	17	16	16	15	15	15	15	18	18	17	17	17	17	11686	12341	11717	10965	11743	11189	97204	103050	102510	106940	95051	101860	0.96144	1.01926	1.01392	1.05774	0.940145
O75122	CLIP-associating protein 2 OS=Homo sapiens OX=9606 GN=CLASP2 PE=1 SV=3	CLASP2	141.06	14.6	34	13	11	11	5	6	7	5	7	4	10	9	11	9	11	8	8	7	9	7	9	7	8	7	9	7	9	7	3574.8	2602.6	3352.2	3475	3033	2578.7	81727	68852	66172	71070	65135	65074	1.17303	0.988235	0.949769	1.02007	0.934885
O75127	Pentatricopeptide repeat-containing protein 1, mitochondrial OS=Homo sapiens OX=9606 GN=PTCD1 PE=1 SV=2	PTCD1	78.855	11.3	10	6	6	6	1	2	1	0	2	4	4	3	4	3	5	5	4	3	4	3	5	5	4	3	4	3	5	5	3647.9	3440.3	4261.8	2860.7	4756.8	4648.1	61444	92711	93759	53326	101960	114280	0.712422	1.07495	1.0871	0.618296	1.18219
O75128	Protein cordon-bleu OS=Homo sapiens OX=9606 GN=COBL PE=1 SV=2	COBL	135.62	2.8	4	2	2	2	1	1	1	1	0	0	2	1	1	1	2	0	2	1	1	1	2	0	2	1	1	1	2	0	439.97	183.96	141.79	100.77	206.81		0	0	0	0	0	0
O75131	Copine-3 OS=Homo sapiens OX=9606 GN=CPNE3 PE=1 SV=1	CPNE3	60.13	47.9	111	20	19	20	20	17	20	18	18	18	20	20	18	19	20	19	19	19	17	18	19	18	20	20	18	19	20	19	217850	223550	242740	213820	221730	221470	843420	822450	917220	871440	802980	859180	0.989022	0.964432	1.07556	1.02188	0.941601
O75143	Autophagy-related protein 13 OS=Homo sapiens OX=9606 GN=ATG13 PE=1 SV=1	ATG13	56.571	3.7	5	1	1	1	1	1	0	1	1	1	1	1	0	1	1	1	1	1	0	1	1	1	1	1	0	1	1	1	1338.1	1946.1		1127.2	1198.4	1629.7	0	0	0	0	0	0
O75146	Huntingtin-interacting protein 1-related protein OS=Homo sapiens OX=9606 GN=HIP1R PE=1 SV=2	HIP1R	119.39	18.1	64	14	13	13	10	10	9	12	12	11	13	13	13	12	14	13	12	12	12	11	13	12	12	12	12	11	13	12	8907.3	8301.6	7069.6	7475.7	8813.9	6864.9	98017	86117	87810	94544	95265	84151	1.0773	0.946507	0.965115	1.03913	1.04705
O75147	Obscurin-like protein 1 OS=Homo sapiens OX=9606 GN=OBSL1 PE=1 SV=4	OBSL1	206.94	3.5	16	5	5	5	3	1	2	4	2	4	4	4	4	5	3	4	4	4	4	5	3	4	4	4	4	5	3	4	3939.7	3545.2	3245.6	3785.2	3377.3	3616.4	252570	209190	240250	258780	233290	265190	1.03848	0.860115	0.987823	1.06401	0.959206
O75150	E3 ubiquitin-protein ligase BRE1B OS=Homo sapiens OX=9606 GN=RNF40 PE=1 SV=5	RNF40	113.68	15.8	47	11	9	11	4	9	8	6	10	10	7	10	10	8	10	11	5	8	8	6	8	9	7	10	10	8	10	11	5722.4	8050.7	7873.7	6190.4	8360.8	7755.3	107600	130030	129780	112610	139800	141180	0.848357	1.0252	1.02323	0.887858	1.10223
O75152	Zinc finger CCCH domain-containing protein 11A OS=Homo sapiens OX=9606 GN=ZC3H11A PE=1 SV=3	ZC3H11A	89.13	14.6	23	7	7	7	3	5	5	3	4	3	5	5	6	4	5	5	5	5	6	4	5	5	5	5	6	4	5	5	5938.6	15976	14827	5567.4	16655	12642	239470	424470	380760	253540	452310	422170	0.6613	1.17218	1.05147	0.700155	1.24906
O75153	Clustered mitochondria protein homolog OS=Homo sapiens OX=9606 GN=CLUH PE=1 SV=2	CLUH	146.67	36.1	138	32	32	32	22	24	25	18	26	23	25	26	29	24	26	24	25	26	29	24	26	24	25	26	29	24	26	24	27115	42920	49312	21529	40873	38364	189510	274840	269270	164280	280890	261990	0.789198	1.14455	1.12135	0.684129	1.16974
O75157	TSC22 domain family protein 2 OS=Homo sapiens OX=9606 GN=TSC22D2 PE=1 SV=3	TSC22D2	79.227	11.8	15	5	4	4	3	2	3	1	3	3	5	4	5	4	4	5	4	3	4	3	3	4	4	3	4	3	3	4	24015	22695	19893	9759.3	19047	20786	124280	122710	118700	90455	127750	134770	1.03759	1.02448	0.991004	0.755192	1.06656
O75165	DnaJ homolog subfamily C member 13 OS=Homo sapiens OX=9606 GN=DNAJC13 PE=1 SV=5	DNAJC13	254.41	22	186	36	36	36	35	32	31	30	30	28	35	34	33	33	35	34	35	34	33	33	35	34	35	34	33	33	35	34	16419	16260	15728	15349	14127	14717	122250	113940	121130	120710	104550	120570	1.04316	0.972253	1.03361	1.03002	0.892128
O75170	Serine/threonine-protein phosphatase 6 regulatory subunit 2 OS=Homo sapiens OX=9606 GN=PPP6R2 PE=1 SV=2	PPP6R2	104.94	12.9	23	8	8	8	2	3	2	6	5	5	4	6	3	7	6	5	4	6	3	7	6	5	4	6	3	7	6	5	4003.1	5194.9	3793.2	5707.3	5412.7	4591	120870	158940	116430	145270	157180	144300	0.860295	1.13126	0.828693	1.03396	1.11873
O75175	CCR4-NOT transcription complex subunit 3 OS=Homo sapiens OX=9606 GN=CNOT3 PE=1 SV=1	CNOT3	81.871	8.8	25	4	4	4	4	4	4	4	5	4	3	3	3	4	3	4	3	3	3	4	3	4	3	3	3	4	3	4	18118	23695	21163	28416	23034	29088	125070	151990	149810	134860	152850	146390	0.871598	1.0592	1.04401	0.939824	1.06519
O75177	Calcium-responsive transactivator OS=Homo sapiens OX=9606 GN=SS18L1 PE=1 SV=2	SS18L1	42.99	3.3	3	1	1	1	0	1	1	1	0	0	1	1	1	1	1	1	1	1	1	1	1	1	1	1	1	1	1	1	1455.7	1771.6	1064.8	1924.9	1543.4	784.91	0	0	0	0	0	0
O75179	Ankyrin repeat domain-containing protein 17 OS=Homo sapiens OX=9606 GN=ANKRD17 PE=1 SV=3	ANKRD17	274.25	9.8	50	15	11	15	5	11	10	6	10	8	11	13	12	13	12	11	8	10	9	9	10	8	11	13	12	13	12	11	4241.7	4928.5	4315.1	4341	4467.4	4006.9	56825	76179	69349	58572	79625	76755	0.817028	1.0953	0.997098	0.842147	1.14485
O75190	DnaJ homolog subfamily B member 6 OS=Homo sapiens OX=9606 GN=DNAJB6 PE=1 SV=2	DNAJB6	36.087	24.8	24	6	5	6	4	4	5	3	5	3	4	5	6	3	5	4	4	5	5	3	5	3	4	5	6	3	5	4	21248	23917	37867	14050	24720	29715	116710	119930	117600	117750	113800	136960	0.968883	0.995614	0.976271	0.977516	0.944725
O75191	Xylulose kinase OS=Homo sapiens OX=9606 GN=XYLB PE=1 SV=3	XYLB	58.382	13.4	24	5	5	5	3	3	5	5	4	4	4	5	5	5	5	4	4	5	5	5	5	4	4	5	5	5	5	4	3449.1	5817.8	5740.6	5780.1	5831.5	3973.1	51242	42433	47391	55025	47522	44791	1.06605	0.882782	0.985929	1.14475	0.988655
O75208	Ubiquinone biosynthesis protein COQ9, mitochondrial OS=Homo sapiens OX=9606 GN=COQ9 PE=1 SV=1	COQ9	35.509	27.4	23	6	6	6	5	4	2	4	5	3	5	5	4	4	5	6	5	5	4	4	5	6	5	5	4	4	5	6	46214	34745	35176	45554	32567	30822	414020	305450	367870	474320	322210	220330	1.18055	0.870972	1.04896	1.3525	0.918762
O75223	Gamma-glutamylcyclotransferase OS=Homo sapiens OX=9606 GN=GGCT PE=1 SV=1	GGCT	21.007	35.1	14	5	5	5	2	1	3	1	4	3	3	4	5	2	4	5	3	4	5	2	4	5	3	4	5	2	4	5	12475	27832	25360	11166	26900	67480	139140	195110	142080	186520	188120	237580	0.766928	1.07543	0.783134	1.02808	1.0369
O75251	NADH dehydrogenase [ubiquinone] iron-sulfur protein 7, mitochondrial OS=Homo sapiens OX=9606 GN=NDUFS7 PE=1 SV=3	NDUFS7	23.563	10.8	11	2	2	2	2	2	2	2	1	2	2	2	2	2	2	2	2	2	2	2	2	2	2	2	2	2	2	2	25046	19315	20403	21600	20140	18012	137620	100750	114600	119860	106440	104910	1.20687	0.883539	1.005	1.05113	0.933439
O75306	NADH dehydrogenase [ubiquinone] iron-sulfur protein 2, mitochondrial OS=Homo sapiens OX=9606 GN=NDUFS2 PE=1 SV=2	NDUFS2	52.545	43	63	14	14	14	13	11	9	8	10	12	12	12	11	12	13	12	12	12	11	12	13	12	12	12	11	12	13	12	60060	47930	52062	64780	57129	59389	290880	243060	237530	262280	231410	247450	1.15382	0.964135	0.942199	1.04037	0.917923
O75312	Zinc finger protein ZPR1 OS=Homo sapiens OX=9606 GN=ZPR1 PE=1 SV=1	ZPR1	50.925	49.2	59	15	14	15	8	11	11	8	10	11	10	10	12	13	11	13	9	10	12	12	11	13	10	10	12	13	11	13	22008	24609	30655	31359	30663	34646	158640	159050	178150	157080	165520	164320	0.968538	0.971041	1.08765	0.959013	1.01054
P62068	Ubiquitin carboxyl-terminal hydrolase 46 OS=Homo sapiens OX=9606 GN=USP46 PE=1 SV=1	USP46	42.442	7.1	2	2	2	2	0	0	0	1	1	0	1	1	1	2	1	1	1	1	1	2	1	1	1	1	1	2	1	1	843.14	767.94	604.05	985.92	902.47	650.23	0	0	0	0	0	0
O75319	RNA/RNP complex-1-interacting phosphatase OS=Homo sapiens OX=9606 GN=DUSP11 PE=1 SV=2	DUSP11	43.71	10.9	5	3	3	3	1	0	2	1	1	0	2	3	3	3	2	1	2	3	3	3	2	1	2	3	3	3	2	1	147040	1999.6	147330	142490	1559.6	869.82	0	306760	3976500	1136100	1382100	0		0.180408	2.33862	0.668151	0.812825
O75323	Protein NipSnap homolog 2 OS=Homo sapiens OX=9606 GN=NIPSNAP2 PE=1 SV=1	NIPSNAP2	33.742	30.8	31	6	6	6	4	5	6	5	7	4	5	6	5	6	6	4	5	6	5	6	6	4	5	6	5	6	6	4	33556	37649	26105	59882	38850	28897	188880	193070	147090	293980	198930	178300	0.944203	0.965149	0.735297	1.46959	0.994443
O75326	Semaphorin-7A OS=Homo sapiens OX=9606 GN=SEMA7A PE=1 SV=1	SEMA7A	74.823	3.9	8	2	2	2	1	2	2	0	1	2	2	2	2	1	2	2	2	2	2	1	2	2	2	2	2	1	2	2	2462.5	2700.9	2893	834.1	2757.7	2468.7	55172	57540	65354	0	55745	59102	0.941781	0.982203	1.11559		0.951562
O75330	Hyaluronan mediated motility receptor OS=Homo sapiens OX=9606 GN=HMMR PE=1 SV=2	HMMR	84.099	7.2	6	4	4	4	0	2	1	0	1	2	0	3	4	0	3	3	0	3	4	0	3	3	0	3	4	0	3	3		923.46	2000.7		1494.2	1581.8	0	34913	34823	0	32271	33912		1.02747	1.02482		0.949713
O75340	Programmed cell death protein 6 OS=Homo sapiens OX=9606 GN=PDCD6 PE=1 SV=1	PDCD6	21.868	40.3	31	6	6	6	5	5	4	5	5	7	6	5	5	6	5	6	6	5	5	6	5	6	6	5	5	6	5	6	148250	135170	54132	158800	118580	119950	675390	688270	634200	702900	649880	594970	1.02705	1.04664	0.964414	1.06888	0.988258
O75347	Tubulin-specific chaperone A OS=Homo sapiens OX=9606 GN=TBCA PE=1 SV=3	TBCA	12.855	55.6	46	7	7	7	8	9	7	6	7	9	7	7	7	7	7	6	7	7	7	7	7	6	7	7	7	7	7	6	675560	657010	612190	607030	666150	635600	1630000	1517100	1526500	1423300	1550600	1711500	1.04498	0.972604	0.97863	0.912469	0.994081
O75348	V-type proton ATPase subunit G 1 OS=Homo sapiens OX=9606 GN=ATP6V1G1 PE=1 SV=3	ATP6V1G1	13.757	63.6	27	6	6	6	5	6	4	4	5	3	5	6	4	4	5	3	5	6	4	4	5	3	5	6	4	4	5	3	145200	160990	138220	143160	144700	96510	460470	507310	462270	468050	462080	470910	0.975886	1.07516	0.9797	0.99195	0.979298
O75351	Vacuolar protein sorting-associated protein 4B OS=Homo sapiens OX=9606 GN=VPS4B PE=1 SV=2	VPS4B	49.301	42.3	82	14	11	14	13	15	14	14	14	12	13	14	14	14	14	12	10	11	11	11	11	10	13	14	14	14	14	12	69811	66526	65384	72237	63824	54721	431830	396920	405590	448570	377980	378540	1.06212	0.976261	0.997586	1.1033	0.929676
O75352	Mannose-P-dolichol utilization defect 1 protein OS=Homo sapiens OX=9606 GN=MPDU1 PE=1 SV=2	MPDU1	26.638	13.8	21	3	3	3	4	2	4	3	4	4	3	2	3	3	3	3	3	2	3	3	3	3	3	2	3	3	3	3	152300	128750	135610	136090	138240	137870	336590	316050	302880	302410	293850	319140	1.07944	1.01357	0.97133	0.969822	0.942371
O75355	Ectonucleoside triphosphate diphosphohydrolase 3 OS=Homo sapiens OX=9606 GN=ENTPD3 PE=1 SV=2	ENTPD3	59.105	14.2	19	5	5	5	4	5	5	0	3	2	4	4	4	2	3	3	4	4	4	2	3	3	4	4	4	2	3	3	4407.2	5503.2	5385.7	1093.6	3890.6	2608.2	28781	54627	36859	20102	42383	26826	0.82397	1.56391	1.05523	0.575499	1.21338
O75356	Ectonucleoside triphosphate diphosphohydrolase 5 OS=Homo sapiens OX=9606 GN=ENTPD5 PE=1 SV=1	ENTPD5	47.517	7	7	2	2	2	2	1	1	2	0	1	2	1	1	2	1	1	2	1	1	2	1	1	2	1	1	2	1	1	6910.9	1448.2	1329.8	5272.2	1475.4	1156.7	97383	0	0	79789	0	0	1.0993			0.900695
O75362	Zinc finger protein 217 OS=Homo sapiens OX=9606 GN=ZNF217 PE=1 SV=1	ZNF217	115.27	2.8	10	2	2	2	1	1	3	1	2	2	1	1	2	1	2	2	1	1	2	1	2	2	1	1	2	1	2	2	623.82	789.33	1003	798.42	1229.5	1070.9	0	0	32633	0	33311	33706			0.982428		1.00284
O75367	Core histone macro-H2A.1 OS=Homo sapiens OX=9606 GN=MACROH2A1 PE=1 SV=4	MACROH2A1	39.617	49.5	94	15	13	15	16	18	14	16	17	13	15	15	15	15	15	14	13	13	13	13	13	12	15	15	15	15	15	14	322390	349100	296990	359700	325640	276610	1286900	1227100	1197100	1466900	1203300	1193400	1.01937	0.971999	0.948236	1.16195	0.953147
O75368	SH3 domain-binding glutamic acid-rich-like protein OS=Homo sapiens OX=9606 GN=SH3BGRL PE=1 SV=1	SH3BGRL	12.774	71.1	22	7	7	7	3	2	5	4	4	4	4	5	7	4	5	5	4	5	7	4	5	5	4	5	7	4	5	5	141130	71720	190990	164780	75979	146650	489540	435410	444620	483460	429910	472940	1.06581	0.947959	0.96801	1.05257	0.935984
O75369	Filamin-B OS=Homo sapiens OX=9606 GN=FLNB PE=1 SV=2	FLNB	278.16	67.1	778	119	110	119	137	125	135	127	128	126	113	110	115	114	112	112	105	102	106	106	103	103	113	110	115	114	112	112	579760	446680	476790	465560	474050	464240	6409800	4765300	5381400	5250200	4970500	5478300	1.19232	0.886416	1.00102	0.976615	0.924587
O75373	Zinc finger protein 737 OS=Homo sapiens OX=9606 GN=ZNF737 PE=2 SV=3	ZNF737	61.931	8.2	8	3	2	3	2	1	1	1	1	2	3	3	3	3	3	3	2	2	2	2	2	2	3	3	3	3	3	3	4047.4	4057.5	3701.7	3908	3816.6	3336.4	41720	65446	62634	59987	62249	53458	0.724528	1.13656	1.08773	1.04176	1.08104
O75376	Nuclear receptor corepressor 1 OS=Homo sapiens OX=9606 GN=NCOR1 PE=1 SV=2	NCOR1	270.21	11.1	66	18	18	18	11	10	10	9	13	13	13	13	15	12	15	16	13	13	15	12	15	16	13	13	15	12	15	16	2981.2	2514.7	2461.7	3067	3313.1	4462.6	116320	149920	158860	129870	152140	170110	0.795604	1.02542	1.08657	0.888283	1.04061
O75379	Vesicle-associated membrane protein 4 OS=Homo sapiens OX=9606 GN=VAMP4 PE=1 SV=2	VAMP4	16.397	8.5	5	1	1	1	1	0	1	1	1	1	1	1	1	1	1	1	1	1	1	1	1	1	1	1	1	1	1	1	3474.4	3026.4	2979.3	5951	2839.3	3027.9	0	0	0	0	0	0
O75380	NADH dehydrogenase [ubiquinone] iron-sulfur protein 6, mitochondrial OS=Homo sapiens OX=9606 GN=NDUFS6 PE=1 SV=1	NDUFS6	13.711	29	25	3	3	3	5	4	4	4	4	4	3	3	3	3	3	3	3	3	3	3	3	3	3	3	3	3	3	3	64606	53623	48178	63092	52133	48949	333550	237270	242720	314030	238620	242060	1.2444	0.885198	0.905531	1.17157	0.890235
O75381	Peroxisomal membrane protein PEX14 OS=Homo sapiens OX=9606 GN=PEX14 PE=1 SV=1	PEX14	41.236	3.2	6	1	1	1	1	1	1	1	1	1	1	1	1	1	1	1	1	1	1	1	1	1	1	1	1	1	1	1	6246.9	5587.6	5185.8	6614	5803.9	5403.8	0	0	0	0	0	0
O75390	Citrate synthase, mitochondrial OS=Homo sapiens OX=9606 GN=CS PE=1 SV=2	CS	51.712	45.1	70	15	15	15	10	10	11	12	12	15	13	14	15	15	14	14	13	14	15	15	14	14	13	14	15	15	14	14	348490	461680	445220	471380	380960	422350	2041900	2138900	2093200	2228100	2028200	1987100	0.97875	1.02524	1.00334	1.068	0.972183
O75391	Sperm-associated antigen 7 OS=Homo sapiens OX=9606 GN=SPAG7 PE=1 SV=2	SPAG7	26.034	13.2	7	2	2	2	1	1	2	1	1	1	2	2	2	2	2	2	2	2	2	2	2	2	2	2	2	2	2	2	3716.2	7185	6024	3987.7	7042.7	6012.1	29148	39600	42505	30320	39197	38286	0.798371	1.08465	1.16422	0.830473	1.07362
O75396	Vesicle-trafficking protein SEC22b OS=Homo sapiens OX=9606 GN=SEC22B PE=1 SV=5	SEC22B	24.74	48.8	43	8	8	8	8	6	7	8	6	8	7	7	8	8	7	7	7	7	8	8	7	7	7	7	8	8	7	7	240800	228230	224160	251040	221520	197530	729520	669620	648270	694200	673470	674010	1.07044	0.982546	0.951219	1.01861	0.988195
O75400	Pre-mRNA-processing factor 40 homolog A OS=Homo sapiens OX=9606 GN=PRPF40A PE=1 SV=2	PRPF40A	108.8	21.6	74	17	17	17	9	11	11	13	15	15	16	14	15	17	16	16	16	14	15	17	16	16	16	14	15	17	16	16	65499	54900	52410	66043	61921	58428	357570	321240	323070	359710	321670	340050	1.06035	0.952617	0.958044	1.0667	0.953892
O75410	Transforming acidic coiled-coil-containing protein 1 OS=Homo sapiens OX=9606 GN=TACC1 PE=1 SV=2	TACC1	87.793	20.4	32	10	9	10	7	5	4	6	5	5	8	6	5	8	7	6	7	5	5	7	6	5	8	6	5	8	7	6	5513	3596.1	6489.4	4504.3	2806.6	2549.6	100780	63619	66422	75334	59585	56746	1.43124	0.903495	0.943302	1.06987	0.846206
O75414	Nucleoside diphosphate kinase 6 OS=Homo sapiens OX=9606 GN=NME6 PE=1 SV=3	NME6	21.142	16.7	9	3	3	3	3	0	2	2	2	0	3	2	3	3	3	1	3	2	3	3	3	1	3	2	3	3	3	1	5492.4	3955.2	4976.1	5759.3	5646.2	2431.4	35340	30487	31988	33913	33251	0	1.07105	0.923966	0.969457	1.0278	1.00773
O75419	Cell division control protein 45 homolog OS=Homo sapiens OX=9606 GN=CDC45 PE=1 SV=1	CDC45	65.568	4.1	3	2	2	2	0	1	0	0	0	2	0	1	2	0	1	2	0	1	2	0	1	2	0	1	2	0	1	2		286.41	584.45		385.2	887.2	0	0	9090.5	0	0	14590			0.767763
O75420	GRB10-interacting GYF protein 1 OS=Homo sapiens OX=9606 GN=GIGYF1 PE=1 SV=2	GIGYF1	114.6	6.5	10	4	3	4	3	1	1	2	2	1	4	2	3	4	3	2	3	1	2	3	2	2	4	2	3	4	3	2	1949.4	1220.9	2169.8	1951.3	1391.8	1449	28133	0	67710	27033	18737	65429	0.679403		1.63518	0.652839	0.452493
O75427	Leucine-rich repeat and calponin homology domain-containing protein 4 OS=Homo sapiens OX=9606 GN=LRCH4 PE=1 SV=2	LRCH4	73.449	15.2	28	6	6	6	5	5	4	5	5	4	5	6	5	6	5	5	5	6	5	6	5	5	5	6	5	6	5	5	4569.3	5018.9	4025.6	4772.8	3835.9	3503.9	48806	50442	46525	54577	44237	43347	1.01703	1.05112	0.969493	1.13728	0.921815
O75431	Metaxin-2 OS=Homo sapiens OX=9606 GN=MTX2 PE=1 SV=1	MTX2	29.763	28.5	32	5	5	5	5	6	5	5	5	6	5	5	4	4	5	5	5	5	4	4	5	5	5	5	4	4	5	5	92596	86442	67195	87375	77600	65339	297210	261770	235920	303510	241200	227660	1.13781	1.00214	0.903176	1.16193	0.923389
O75436	Vacuolar protein sorting-associated protein 26A OS=Homo sapiens OX=9606 GN=VPS26A PE=1 SV=2	VPS26A	38.169	52.6	83	15	14	15	16	14	14	13	15	11	13	14	14	12	13	12	12	13	13	11	12	11	13	14	14	12	13	12	187750	172020	171530	131700	184000	120940	780800	705410	713270	772530	678730	706040	1.07529	0.971465	0.98229	1.0639	0.934722
O75438	NADH dehydrogenase [ubiquinone] 1 beta subcomplex subunit 1 OS=Homo sapiens OX=9606 GN=NDUFB1 PE=1 SV=1	NDUFB1	6.9611	50	12	3	3	3	2	3	2	1	2	2	2	3	2	2	2	2	2	3	2	2	2	2	2	3	2	2	2	2	33947	26899	25772	24973	31598	25953	55857	41844	44108	41712	50961	46316	1.19353	0.894109	0.942485	0.891288	1.08892
O75439	Mitochondrial-processing peptidase subunit beta OS=Homo sapiens OX=9606 GN=PMPCB PE=1 SV=2	PMPCB	54.366	44.8	79	17	16	16	14	16	14	12	12	11	16	16	16	15	15	15	15	15	15	14	14	14	15	15	15	14	14	14	75940	72051	63291	73068	64942	68973	285850	263870	263620	287070	263250	260340	1.0561	0.974889	0.973966	1.0606	0.972599
O75446	Histone deacetylase complex subunit SAP30 OS=Homo sapiens OX=9606 GN=SAP30 PE=1 SV=1	SAP30	23.306	9.5	6	2	2	2	1	1	1	1	1	1	1	1	2	2	1	1	1	1	2	2	1	1	1	1	2	2	1	1	8820.7	9069.3	9095.8	10161	9349.5	9357.3	0	0	73246	75801	0	0			0.982858	1.01714
O75448	Mediator of RNA polymerase II transcription subunit 24 OS=Homo sapiens OX=9606 GN=MED24 PE=1 SV=1	MED24	110.3	8.1	30	6	6	6	5	5	5	6	4	5	6	6	5	6	6	6	6	6	5	6	6	6	6	6	5	6	6	6	2029.6	2590.9	1975.7	2422.6	2661.5	2317.8	31196	38564	37459	37223	37883	38650	0.847046	1.0471	1.0171	1.01069	1.02861
O75449	Katanin p60 ATPase-containing subunit A1 OS=Homo sapiens OX=9606 GN=KATNA1 PE=1 SV=1	KATNA1	55.964	15.9	10	5	5	5	3	2	0	5	0	0	3	4	2	5	2	1	3	4	2	5	2	1	3	4	2	5	2	1	1306	1472.5	748.77	1746.6	704.25	160.88	15461	12977	15816	13908	11774	0	1.10537	0.927777	1.13075	0.994338	0.84177
O75475	PC4 and SFRS1-interacting protein OS=Homo sapiens OX=9606 GN=PSIP1 PE=1 SV=1	PSIP1	60.103	19.6	37	8	7	7	7	6	3	9	5	7	8	8	8	8	8	8	7	7	7	7	7	7	7	7	7	7	7	7	17176	15915	16201	27631	16770	18717	205150	174870	191140	208400	191140	228460	1.02647	0.874962	0.956369	1.04273	0.956369
O75477	Erlin-1 OS=Homo sapiens OX=9606 GN=ERLIN1 PE=1 SV=2	ERLIN1	39.171	32.8	19	8	7	7	4	4	2	3	4	2	6	7	7	6	7	5	5	6	6	5	6	4	5	6	6	5	6	4	33092	33287	33422	28266	29342	26190	247980	249550	231770	245450	243400	228150	1.02875	1.03526	0.961502	1.01825	1.00975
O75489	NADH dehydrogenase [ubiquinone] iron-sulfur protein 3, mitochondrial OS=Homo sapiens OX=9606 GN=NDUFS3 PE=1 SV=1	NDUFS3	30.241	32.6	46	8	8	8	7	7	8	8	9	7	7	8	7	7	8	8	7	8	7	7	8	8	7	8	7	7	8	8	91948	81865	75790	78254	77700	73037	354350	295460	301070	309910	293070	285240	1.15606	0.963928	0.98223	1.01107	0.956131
O75494	Serine/arginine-rich splicing factor 10 OS=Homo sapiens OX=9606 GN=SRSF10 PE=1 SV=1	SRSF10	31.3	19.1	20	4	4	4	4	4	4	2	2	4	4	4	4	4	4	4	4	4	4	4	4	4	4	4	4	4	4	4	147830	160150	150350	152220	154490	158750	482160	499330	482810	504830	481130	559240	0.961276	0.995508	0.962572	1.00647	0.959222
O75506	Heat shock factor-binding protein 1 OS=Homo sapiens OX=9606 GN=HSBP1 PE=1 SV=1	HSBP1	8.5435	64.5	13	3	3	3	2	2	2	2	2	3	2	2	3	3	2	3	2	2	3	3	2	3	2	2	3	3	2	3	52175	68509	94795	59913	81635	101380	167420	275050	286530	125470	391260	282210	0.657434	1.08008	1.12516	0.492703	1.53642
O75521	Enoyl-CoA delta isomerase 2 OS=Homo sapiens OX=9606 GN=ECI2 PE=1 SV=4	ECI2	43.585	32.7	40	8	8	8	8	7	7	7	5	6	7	6	6	7	5	6	7	6	6	7	5	6	7	6	6	7	5	6	44935	25371	23147	50367	24890	40583	258240	220290	228100	267240	232920	247220	1.06563	0.909031	0.941259	1.10277	0.961149
O75529	TAF5-like RNA polymerase II p300/CBP-associated factor-associated factor 65 kDa subunit 5L OS=Homo sapiens OX=9606 GN=TAF5L PE=1 SV=1	TAF5L	66.155	2.2	5	1	1	1	0	1	1	1	1	1	1	1	1	1	1	1	1	1	1	1	1	1	1	1	1	1	1	1	682.72	732.46	645.69	789.06	831.96	533.51	0	0	0	0	0	0
O75530	Polycomb protein EED OS=Homo sapiens OX=9606 GN=EED PE=1 SV=2	EED	50.197	15.2	24	5	5	5	2	6	4	3	4	5	3	5	4	3	4	5	3	5	4	3	4	5	3	5	4	3	4	5	2676.3	5221	3906.9	2530.8	4984.9	4502.6	26611	45462	40466	26801	44608	45541	0.695746	1.18861	1.05798	0.700713	1.16628
O75531	Barrier-to-autointegration factor OS=Homo sapiens OX=9606 GN=BANF1 PE=1 SV=1	BANF1	10.058	48.3	41	4	4	4	8	6	6	8	5	8	4	4	4	4	4	4	4	4	4	4	4	4	4	4	4	4	4	4	579620	563720	539890	602450	600490	609050	1016000	985910	1027900	1083200	1057900	1127800	0.967817	0.939154	0.979153	1.03183	1.00773
O75533	Splicing factor 3B subunit 1 OS=Homo sapiens OX=9606 GN=SF3B1 PE=1 SV=3	SF3B1	145.83	42.5	234	38	38	38	39	39	43	38	35	40	32	34	34	33	33	34	32	34	34	33	33	34	32	34	34	33	33	34	98314	104810	100420	94286	100460	105480	731260	748170	781970	755770	765840	788980	0.959661	0.981853	1.02621	0.991826	1.00504
O75534	Cold shock domain-containing protein E1 OS=Homo sapiens OX=9606 GN=CSDE1 PE=1 SV=2	CSDE1	88.884	37.5	105	25	25	25	17	23	17	14	17	17	21	22	21	19	21	21	21	22	21	19	21	21	21	22	21	19	21	21	90062	116430	105590	98380	113740	102430	1649200	1907800	2013200	1506900	1936400	2092800	0.890954	1.03066	1.0876	0.814078	1.04611
O75569	Interferon-inducible double-stranded RNA-dependent protein kinase activator A OS=Homo sapiens OX=9606 GN=PRKRA PE=1 SV=1	PRKRA	34.404	35.8	45	8	8	8	8	8	7	9	7	6	8	8	8	8	8	7	8	8	8	8	8	7	8	8	8	8	8	7	67416	67430	63503	69978	69887	48415	203300	194300	193730	214700	198590	188460	1.0224	0.977135	0.974268	1.07973	0.998709
O75586	Mediator of RNA polymerase II transcription subunit 6 OS=Homo sapiens OX=9606 GN=MED6 PE=1 SV=2	MED6	28.424	13.8	8	2	2	2	1	0	2	1	2	2	1	1	2	2	2	2	1	1	2	2	2	2	1	1	2	2	2	2	1532.2	1748.5	2908.3	2811.7	3604	2251.2	0	0	21560	21227	25845	17501			1.00124	0.985778	1.20024
O75592	E3 ubiquitin-protein ligase MYCBP2 OS=Homo sapiens OX=9606 GN=MYCBP2 PE=1 SV=4	MYCBP2	513.63	0.3	5	1	1	1	1	1	1	1	0	1	1	1	1	1	0	1	1	1	1	1	0	1	1	1	1	1	0	1	27.967	37.775	26.83	48.31		40.851	0	0	0	0	0	0
O75600	2-amino-3-ketobutyrate coenzyme A ligase, mitochondrial OS=Homo sapiens OX=9606 GN=GCAT PE=1 SV=1	GCAT	45.285	5.7	10	2	2	2	2	0	2	2	2	2	2	2	2	2	2	2	2	2	2	2	2	2	2	2	2	2	2	2	3454.4	1538.3	1252.2	3340.8	2801.7	2622.4	30919	15031	17228	26760	22474	25418	1.34596	0.654328	0.749967	1.16491	0.978336
O75607	Nucleoplasmin-3 OS=Homo sapiens OX=9606 GN=NPM3 PE=1 SV=3	NPM3	19.343	48.3	40	5	5	5	7	7	7	6	7	6	5	5	5	4	5	4	5	5	5	4	5	4	5	5	5	4	5	4	95739	81635	83669	81329	84630	72008	223790	184750	198740	210620	197330	194670	1.10979	0.916191	0.985569	1.04448	0.978577
O75608	Acyl-protein thioesterase 1 OS=Homo sapiens OX=9606 GN=LYPLA1 PE=1 SV=1	LYPLA1	24.669	51.3	37	6	6	6	7	7	6	5	7	5	6	6	6	6	6	5	6	6	6	6	6	5	6	6	6	6	6	5	56541	52647	46149	58918	48097	41392	331690	281560	240880	350220	256650	220440	1.18359	1.00471	0.859549	1.24971	0.915822
O75616	GTPase Era, mitochondrial OS=Homo sapiens OX=9606 GN=ERAL1 PE=1 SV=2	ERAL1	48.349	26.8	33	8	8	8	4	7	7	3	6	6	5	8	8	3	7	7	5	8	8	3	7	7	5	8	8	3	7	7	5118.9	18062	15323	2908.5	14130	12434	37018	79172	81350	30548	75143	72703	0.590816	1.26361	1.29837	0.487554	1.1993
O75629	Protein CREG1 OS=Homo sapiens OX=9606 GN=CREG1 PE=1 SV=1	CREG1	24.074	9.5	12	1	1	1	2	2	2	2	2	2	1	1	1	1	1	1	1	1	1	1	1	1	1	1	1	1	1	1	6832.8	11094	10003	8011.4	11490	9443.2	0	0	0	0	0	0
O75635	Serpin B7 OS=Homo sapiens OX=9606 GN=SERPINB7 PE=1 SV=1	SERPINB7	42.904	2.6	1	1	1	1	0	0	0	0	0	1	0	0	0	0	1	1	0	0	0	0	1	1	0	0	0	0	1	1					297.63	399.56	0	0	0	0	0	0
O75643	U5 small nuclear ribonucleoprotein 200 kDa helicase OS=Homo sapiens OX=9606 GN=SNRNP200 PE=1 SV=2	SNRNP200	244.5	49.6	415	81	81	81	63	74	71	68	68	71	71	74	76	71	75	75	71	74	76	71	75	75	71	74	76	71	75	75	74346	100070	89796	76345	97371	89183	487540	540470	545810	500440	552930	571920	0.914392	1.01366	1.02368	0.938586	1.03703
O75663	TIP41-like protein OS=Homo sapiens OX=9606 GN=TIPRL PE=1 SV=2	TIPRL	31.444	47.8	46	9	9	9	7	8	7	8	11	5	9	9	9	9	9	8	9	9	9	9	9	8	9	9	9	9	9	8	68915	60680	54520	78892	59561	52902	304480	254030	245900	352610	254780	238990	1.10667	0.923303	0.893754	1.28161	0.926029
O75674	TOM1-like protein 1 OS=Homo sapiens OX=9606 GN=TOM1L1 PE=1 SV=2	TOM1L1	52.988	24.2	19	6	6	6	3	3	2	4	4	3	4	4	4	5	4	4	4	4	4	5	4	4	4	4	4	5	4	4	13133	14238	12818	38614	13865	11155	147650	155090	148930	178250	149860	120230	0.984322	1.03392	0.992856	1.18832	0.999056
O75676	Ribosomal protein S6 kinase alpha-4 OS=Homo sapiens OX=9606 GN=RPS6KA4 PE=1 SV=1	RPS6KA4	85.605	10.8	20	6	6	6	1	6	4	1	4	4	3	6	5	2	5	5	3	6	5	2	5	5	3	6	5	2	5	5	1322.5	8902.2	3300.2	1070.8	3854.4	3102.4	32248	80225	70546	31640	74635	64453	0.546967	1.36072	1.19655	0.536655	1.26591
O75683	Surfeit locus protein 6 OS=Homo sapiens OX=9606 GN=SURF6 PE=1 SV=3	SURF6	41.45	7.8	6	3	3	3	1	1	1	2	0	1	3	1	3	3	3	3	3	1	3	3	3	3	3	1	3	3	3	3	10844	4612.4	9135.7	10797	16567	9252.4	94873	0	76381	93181	106470	80657	1.0505		0.845742	1.03176	1.17891
O75688	Protein phosphatase 1B OS=Homo sapiens OX=9606 GN=PPM1B PE=1 SV=1	PPM1B	52.642	22.3	15	6	4	4	2	2	2	4	2	3	5	6	6	6	4	5	3	4	4	4	2	3	3	4	4	4	2	3	14113	9538.8	8453.1	10486	7056.4	7330.6	136130	113210	106210	133400	103360	103700	1.17352	0.975934	0.91559	1.14998	0.891022
O75691	Small subunit processome component 20 homolog OS=Homo sapiens OX=9606 GN=UTP20 PE=1 SV=3	UTP20	318.38	14.3	102	27	27	27	19	15	15	18	21	14	24	23	22	23	23	22	24	23	22	23	23	22	24	23	22	23	23	22	4312.8	3181	4013.4	4393.7	3391.5	3559.6	61336	52200	60371	67066	55974	58955	1.03404	0.880018	1.01777	1.13064	0.943642
O75694	Nuclear pore complex protein Nup155 OS=Homo sapiens OX=9606 GN=NUP155 PE=1 SV=1	NUP155	155.2	36.7	173	33	33	33	28	27	30	29	29	30	32	29	28	30	29	32	32	29	28	30	29	32	32	29	28	30	29	32	46749	44863	39938	47521	48498	48277	252460	239240	227380	245350	254810	248340	1.03215	0.9781	0.929612	1.00308	1.04176
O75695	Protein XRP2 OS=Homo sapiens OX=9606 GN=RP2 PE=1 SV=4	RP2	39.641	11.4	9	3	3	3	1	1	3	2	1	1	2	2	3	2	2	2	2	2	3	2	2	2	2	2	3	2	2	2	9747.3	10270	9122.2	8504.4	9422.8	8705.3	126050	129810	120090	122120	121080	124480	1.01704	1.04738	0.96895	0.985329	0.976937
O75717	WD repeat and HMG-box DNA-binding protein 1 OS=Homo sapiens OX=9606 GN=WDHD1 PE=1 SV=1	WDHD1	125.97	26.5	75	21	21	21	7	14	17	5	16	16	12	17	17	10	17	19	12	17	17	10	17	19	12	17	17	10	17	19	4256.7	12077	11522	3516.3	13831	12318	41416	87951	90102	37447	99021	97945	0.54749	1.16265	1.19108	0.495023	1.30899
O75718	Cartilage-associated protein OS=Homo sapiens OX=9606 GN=CRTAP PE=1 SV=1	CRTAP	46.561	21.2	21	6	6	6	3	2	4	3	5	4	6	5	6	6	6	6	6	5	6	6	6	6	6	5	6	6	6	6	10576	11043	11851	7756	14934	18419	80769	94919	99808	66937	123670	146620	0.790919	0.92948	0.977355	0.655471	1.21102
O75746	Calcium-binding mitochondrial carrier protein Aralar1 OS=Homo sapiens OX=9606 GN=SLC25A12 PE=1 SV=2	SLC25A12	74.761	42.2	56	21	16	16	12	7	8	12	8	9	20	18	18	18	18	17	15	13	13	13	13	12	15	13	13	13	13	12	24982	25723	22636	31056	20609	16702	202330	199250	184200	204010	186650	170700	1.05827	1.04216	0.96344	1.06705	0.976254
O75781	Paralemmin-1 OS=Homo sapiens OX=9606 GN=PALM PE=1 SV=2	PALM	42.075	3.1	1	1	1	1	0	0	0	0	1	0	1	1	1	0	1	1	1	1	1	0	1	1	1	1	1	0	1	1	11009	9993.4	9955.4		9558.3	8701.7	0	0	0	0	0	0
O75787	Renin receptor OS=Homo sapiens OX=9606 GN=ATP6AP2 PE=1 SV=2	ATP6AP2	39.008	18.9	13	5	5	5	2	5	2	2	2	0	4	5	4	4	3	4	4	5	4	4	3	4	4	5	4	4	3	4	9548.5	13279	11272	6962.4	5429.8	7996.5	56308	70537	68379	40856	48654	61703	0.975208	1.22164	1.18427	0.707592	0.842647
O75792	Ribonuclease H2 subunit A OS=Homo sapiens OX=9606 GN=RNASEH2A PE=1 SV=2	RNASEH2A	33.395	21.1	9	4	4	4	0	2	2	1	3	1	3	3	3	2	4	3	3	3	3	2	4	3	3	3	3	2	4	3	20052	18757	15618	15924	19402	20827	218450	227370	227130	181480	230180	211830	1.011	1.05228	1.05117	0.8399	1.06529
O75794	Cell division cycle protein 123 homolog OS=Homo sapiens OX=9606 GN=CDC123 PE=1 SV=1	CDC123	39.134	6.2	5	2	2	2	0	1	1	0	1	2	1	2	2	2	2	2	1	2	2	2	2	2	1	2	2	2	2	2	786.26	2314.6	1782.2	1161.7	2825.7	2171	0	24889	22757	17090	27693	28434		1.02964	0.941438	0.706999	1.14564
O75815	Breast cancer anti-estrogen resistance protein 3 OS=Homo sapiens OX=9606 GN=BCAR3 PE=1 SV=1	BCAR3	92.565	10.2	12	5	5	5	3	2	1	2	2	2	5	4	3	3	4	4	5	4	3	3	4	4	5	4	3	3	4	4	6347.5	6379.8	963.43	647.44	1705.5	5067.5	196060	160500	56500	57484	171210	164920	1.45828	1.19379	0.420244	0.427563	1.27345
O75817	Ribonuclease P protein subunit p20 OS=Homo sapiens OX=9606 GN=POP7 PE=1 SV=2	POP7	15.651	31.4	14	3	3	3	3	3	1	3	3	1	3	3	1	2	3	2	3	3	1	2	3	2	3	3	1	2	3	2	56585	66446	13182	51711	52912	41098	154150	132090	0	137130	113010	143530	1.13361	0.971379		1.00844	0.831066
O75818	Ribonuclease P protein subunit p40 OS=Homo sapiens OX=9606 GN=RPP40 PE=1 SV=3	RPP40	41.833	27	42	7	7	7	7	5	7	9	7	7	7	7	7	7	7	6	7	7	7	7	7	6	7	7	7	7	7	6	14492	14186	11859	13394	14058	10112	84407	78424	66215	80150	76599	67061	1.11833	1.03906	0.877299	1.06193	1.01488
O75821	Eukaryotic translation initiation factor 3 subunit G OS=Homo sapiens OX=9606 GN=EIF3G PE=1 SV=2	EIF3G	35.611	60.3	104	17	17	17	18	16	17	18	19	16	17	15	15	15	17	15	17	15	15	15	17	15	17	15	15	15	17	15	216060	237840	239300	169200	263400	241870	651660	690290	717350	590870	715650	738350	0.95268	1.00915	1.04871	0.863809	1.04623
O75822	Eukaryotic translation initiation factor 3 subunit J OS=Homo sapiens OX=9606 GN=EIF3J PE=1 SV=2	EIF3J	29.062	34.9	53	9	9	9	8	9	10	9	9	8	9	9	9	9	9	9	9	9	9	9	9	9	9	9	9	9	9	9	165800	148920	168290	148680	138690	144000	814570	660400	818420	721920	630700	708610	1.12235	0.90993	1.12766	0.994695	0.869008
O75828	Carbonyl reductase [NADPH] 3 OS=Homo sapiens OX=9606 GN=CBR3 PE=1 SV=3	CBR3	30.85	23.5	14	5	3	3	2	3	2	1	3	3	5	5	5	5	5	5	3	3	3	3	3	3	3	3	3	3	3	3	12973	15061	13732	15342	18752	15037	103590	117100	107270	126130	141460	128160	0.858825	0.970831	0.889334	1.0457	1.17279
O75832	26S proteasome non-ATPase regulatory subunit 10 OS=Homo sapiens OX=9606 GN=PSMD10 PE=1 SV=1	PSMD10	24.428	34.1	31	6	6	6	5	5	6	6	5	4	4	5	6	5	6	4	4	5	6	5	6	4	4	5	6	5	6	4	60729	61234	66153	67331	70875	52822	320260	294690	319870	339360	299200	291830	1.03021	0.947958	1.02896	1.09165	0.962465
O75843	AP-1 complex subunit gamma-like 2 OS=Homo sapiens OX=9606 GN=AP1G2 PE=1 SV=1	AP1G2	87.116	17.7	54	10	10	10	9	9	8	9	9	10	10	10	7	9	10	9	10	10	7	9	10	9	10	10	7	9	10	9	10251	15955	11259	10322	16731	12317	82985	124320	100710	88379	125360	109510	0.788751	1.18163	0.957222	0.840019	1.19151
O75844	CAAX prenyl protease 1 homolog OS=Homo sapiens OX=9606 GN=ZMPSTE24 PE=1 SV=2	ZMPSTE24	54.812	29.5	44	11	11	11	9	8	6	8	6	7	10	10	10	10	10	9	10	10	10	10	10	9	10	10	10	10	10	9	143230	141420	135470	134730	133300	127400	1442700	1368700	1402600	1260800	1217700	1239900	1.09125	1.03527	1.06092	0.953658	0.921058
O75874	Isocitrate dehydrogenase [NADP] cytoplasmic OS=Homo sapiens OX=9606 GN=IDH1 PE=1 SV=2	IDH1	46.659	51	90	17	16	16	13	12	16	17	17	15	16	15	16	16	16	16	15	14	15	15	15	15	15	14	15	15	15	15	260940	253870	251770	323910	242270	199630	1339200	1302200	1266500	1673900	1147500	1062700	1.03121	1.00272	0.975231	1.28894	0.883599
O75879	Glutamyl-tRNA(Gln) amidotransferase subunit B, mitochondrial OS=Homo sapiens OX=9606 GN=GATB PE=1 SV=1	GATB	61.863	3.1	6	1	1	1	1	1	1	1	1	1	1	1	1	1	1	1	1	1	1	1	1	1	1	1	1	1	1	1	619.94	973.54	936.2	695.5	1041.2	1004.9	0	0	0	0	0	0
O75880	Protein SCO1 homolog, mitochondrial OS=Homo sapiens OX=9606 GN=SCO1 PE=1 SV=1	SCO1	33.814	17.9	27	7	7	7	5	7	3	4	5	3	7	7	6	7	6	7	7	7	6	7	6	7	7	7	6	7	6	7	28922	28724	29013	31296	27652	30535	252650	215840	234270	262100	220220	204580	1.09084	0.931911	1.01148	1.13164	0.950823
O75882	Attractin OS=Homo sapiens OX=9606 GN=ATRN PE=1 SV=2	ATRN	158.54	5	8	6	6	6	1	2	0	1	3	1	3	5	2	5	6	4	3	5	2	5	6	4	3	5	2	5	6	4	701.33	1290.1	496.27	963.87	1584.5	1050.6	17930	29853	21748	21715	31832	28917	0.707786	1.17845	0.858502	0.857199	1.25657
O75884	Serine hydrolase RBBP9 OS=Homo sapiens OX=9606 GN=RBBP9 PE=1 SV=2	RBBP9	21	15.6	7	2	2	2	1	1	2	1	1	1	2	2	2	2	2	2	2	2	2	2	2	2	2	2	2	2	2	2	24440	22178	20636	25430	22483	20960	171420	156270	161990	171770	160310	163830	1.04356	0.951329	0.98615	1.04569	0.975923
O75886	Signal transducing adapter molecule 2 OS=Homo sapiens OX=9606 GN=STAM2 PE=1 SV=1	STAM2	58.164	15	22	6	4	4	3	4	4	4	4	3	6	5	5	5	5	4	4	4	3	4	4	3	4	4	3	4	4	3	9767.1	10558	8778.5	9231.5	10393	8545.1	165650	174890	154800	152000	164890	144520	1.03883	1.09678	0.970787	0.953227	1.03406
O75907	Diacylglycerol O-acyltransferase 1 OS=Homo sapiens OX=9606 GN=DGAT1 PE=1 SV=2	DGAT1	55.278	11.9	3	3	3	3	1	2	0	0	0	0	2	3	1	1	1	2	2	3	1	1	1	2	2	3	1	1	1	2	2490.7	3628.3	1268.3	1145.4	1950.7	1556.1	30296	21325	0	0	0	13925	1.38663	0.976032
O75909	Cyclin-K OS=Homo sapiens OX=9606 GN=CCNK PE=1 SV=2	CCNK	64.239	9.3	18	3	3	3	3	3	3	3	3	3	3	3	3	3	3	3	3	3	3	3	3	3	3	3	3	3	3	3	14943	16609	15353	14459	16647	14861	165010	173470	171030	158580	176290	170340	0.975698	1.02572	1.01129	0.937677	1.0424
O75911	Short-chain dehydrogenase/reductase 3 OS=Homo sapiens OX=9606 GN=DHRS3 PE=1 SV=2	DHRS3	33.548	20.5	10	5	5	5	0	1	2	5	1	1	1	2	2	4	3	3	1	2	2	4	3	3	1	2	2	4	3	3	2527.4	3660.9	2910.8	9320.9	5493.6	3448.9	0	36705	31948	46188	38932	28069		1.00926	0.878455	1.27	1.07049
O75915	PRA1 family protein 3 OS=Homo sapiens OX=9606 GN=ARL6IP5 PE=1 SV=1	ARL6IP5	21.614	21.3	27	4	4	4	5	5	4	4	5	4	4	4	3	3	3	3	4	4	3	3	3	3	4	4	3	3	3	3	408800	486360	399270	371670	415890	404070	1095700	1289500	1094000	1025300	1090200	1151200	0.974548	1.14692	0.973035	0.911932	0.969656
O75923	Dysferlin OS=Homo sapiens OX=9606 GN=DYSF PE=1 SV=1	DYSF	237.29	1.5	4	2	1	1	0	0	1	1	1	1	2	1	2	2	2	2	1	0	1	1	1	1	1	0	1	1	1	1	256.06		157.89	157.83	197.08	116.22	0	0	0	0	0	0
O75934	Pre-mRNA-splicing factor SPF27 OS=Homo sapiens OX=9606 GN=BCAS2 PE=1 SV=1	BCAS2	26.131	39.1	25	6	6	6	3	6	2	3	6	5	5	6	5	4	6	6	5	6	5	4	6	6	5	6	5	4	6	6	29677	46666	27479	23318	50268	44182	168040	160390	161260	176980	176530	167820	0.99725	0.951851	0.957014	1.05031	1.04764
O75935	Dynactin subunit 3 OS=Homo sapiens OX=9606 GN=DCTN3 PE=1 SV=1	DCTN3	21.119	21	13	3	3	3	2	2	3	2	2	2	2	2	3	2	2	2	2	2	3	2	2	2	2	2	3	2	2	2	13420	11865	11343	12911	10522	9931.9	82078	69550	61295	80065	61909	62292	1.18044	1.00027	0.881543	1.15149	0.890373
O75937	DnaJ homolog subfamily C member 8 OS=Homo sapiens OX=9606 GN=DNAJC8 PE=1 SV=2	DNAJC8	29.841	20.2	34	6	6	6	5	6	6	4	6	7	6	6	6	6	6	6	6	6	6	6	6	6	6	6	6	6	6	6	50671	57922	54191	49532	56897	52296	176100	194200	201350	173920	190120	193170	0.935989	1.03219	1.0702	0.924402	1.01051
O75940	Survival of motor neuron-related-splicing factor 30 OS=Homo sapiens OX=9606 GN=SMNDC1 PE=1 SV=1	SMNDC1	26.711	23.1	13	3	3	3	2	2	2	2	3	2	2	2	2	2	3	2	2	2	2	2	3	2	2	2	2	2	3	2	36934	38922	32170	37248	47000	21638	293460	314660	301910	279030	317770	225960	1.01614	1.08955	1.0454	0.966176	1.10032
O75947	ATP synthase subunit d, mitochondrial OS=Homo sapiens OX=9606 GN=ATP5PD PE=1 SV=3	ATP5PD	18.491	67.7	56	10	10	10	10	8	10	12	8	8	10	8	9	10	9	9	10	8	9	10	9	9	10	8	9	10	9	9	292440	162930	364260	438310	380370	259730	1090700	1049400	1059800	1143000	1035500	1093000	1.01125	0.972958	0.9826	1.05974	0.96007
O75954	Tetraspanin-9 OS=Homo sapiens OX=9606 GN=TSPAN9 PE=1 SV=1	TSPAN9	26.779	4.6	3	1	1	1	0	0	1	1	0	1	0	1	1	1	0	1	0	1	1	1	0	1	0	1	1	1	0	1		4180.1	5370.9	5987.9		2639	0	0	0	0	0	0
O75955	Flotillin-1 OS=Homo sapiens OX=9606 GN=FLOT1 PE=1 SV=3	FLOT1	47.355	43.8	71	15	15	15	14	12	10	11	12	12	14	14	12	14	14	13	14	14	12	14	14	13	14	14	12	14	14	13	47201	41096	32139	51672	39656	40761	224580	186540	201500	252460	179050	200300	1.08281	0.8994	0.971529	1.21723	0.863287
O75962	Triple functional domain protein OS=Homo sapiens OX=9606 GN=TRIO PE=1 SV=2	TRIO	346.9	5.6	40	13	13	13	4	6	5	9	8	8	7	10	8	10	11	12	7	10	8	10	11	12	7	10	8	10	11	12	1261.8	1494.4	1123.2	1911.4	1923.8	1676.8	52030	50325	46074	58700	59712	59903	0.955427	0.924118	0.846057	1.07791	1.09649
O75964	ATP synthase subunit g, mitochondrial OS=Homo sapiens OX=9606 GN=ATP5MG PE=1 SV=3	ATP5MG	11.428	44.7	16	4	4	4	3	3	2	3	1	4	3	3	3	3	2	4	3	3	3	3	2	4	3	3	3	3	2	4	167380	157250	154180	172710	100820	201050	452290	410490	425350	463860	412560	442660	1.04086	0.944665	0.978862	1.06749	0.949429
O75976	Carboxypeptidase D OS=Homo sapiens OX=9606 GN=CPD PE=1 SV=2	CPD	152.93	33.8	189	34	34	34	34	29	37	28	29	32	32	30	31	29	28	31	32	30	31	29	28	31	32	30	31	29	28	31	65174	54177	57067	57371	49308	53715	390400	316000	356100	369750	299880	334990	1.13317	0.917218	1.03361	1.07323	0.870428
O76003	Glutaredoxin-3 OS=Homo sapiens OX=9606 GN=GLRX3 PE=1 SV=2	GLRX3	37.432	41.5	83	11	11	11	13	14	13	14	14	15	10	11	11	10	10	10	10	11	11	10	10	10	10	11	11	10	10	10	388440	416880	380900	362090	365700	383350	1084800	1107200	1166600	1030400	1035600	1146200	0.990564	1.01102	1.06526	0.94089	0.945638
O76021	Ribosomal L1 domain-containing protein 1 OS=Homo sapiens OX=9606 GN=RSL1D1 PE=1 SV=3	RSL1D1	54.972	37.6	67	13	13	13	11	13	9	12	12	10	13	13	11	12	13	12	13	13	11	12	13	12	13	13	11	12	13	12	220570	195260	135200	224080	191750	181720	838220	671470	775620	866940	725380	729940	1.09153	0.874391	1.01002	1.12893	0.944593
O76024	Wolframin OS=Homo sapiens OX=9606 GN=WFS1 PE=1 SV=2	WFS1	100.29	15.3	39	9	9	9	7	7	8	5	6	6	8	8	9	6	6	9	8	8	9	6	6	9	8	8	9	6	6	9	13490	16558	15424	8444.1	11245	15616	158580	151620	139390	135230	146850	139760	1.09186	1.04394	0.959733	0.93109	1.0111
O76031	ATP-dependent Clp protease ATP-binding subunit clpX-like, mitochondrial OS=Homo sapiens OX=9606 GN=CLPX PE=1 SV=2	CLPX	69.223	32.2	61	16	16	16	9	11	8	10	13	10	13	14	14	12	14	16	13	14	14	12	14	16	13	14	14	12	14	16	14076	22227	20850	13969	21693	22779	94023	132640	132140	98948	130450	139320	0.775425	1.09391	1.08978	0.816042	1.07584
O76054	SEC14-like protein 2 OS=Homo sapiens OX=9606 GN=SEC14L2 PE=1 SV=1	SEC14L2	46.145	33	70	10	10	10	13	12	11	10	12	12	10	9	10	10	10	10	10	9	10	10	10	10	10	9	10	10	10	10	84545	107310	84463	98032	112990	97333	241140	298600	257170	290910	316540	307260	0.845304	1.04673	0.901497	1.01977	1.10962
O76071	Probable cytosolic iron-sulfur protein assembly protein CIAO1 OS=Homo sapiens OX=9606 GN=CIAO1 PE=1 SV=1	CIAO1	37.84	54	61	11	11	11	11	9	10	10	11	10	11	10	9	9	10	9	11	10	9	9	10	9	11	10	9	9	10	9	101870	106660	95372	97274	102800	88836	291430	303830	302710	289180	295390	276340	0.994144	1.03644	1.03262	0.986469	1.00765
O76074	cGMP-specific 3',5'-cyclic phosphodiesterase OS=Homo sapiens OX=9606 GN=PDE5A PE=1 SV=2	PDE5A	99.984	6.9	6	4	4	4	2	0	3	0	0	1	2	4	4	2	1	3	2	4	4	2	1	3	2	4	4	2	1	3	672.52	1047.2	1317.2	256.86	179.16	860.23	35129	14330	21615	13080	0	16281	1.74884	0.713397	1.07607	0.651167
O76080	AN1-type zinc finger protein 5 OS=Homo sapiens OX=9606 GN=ZFAND5 PE=1 SV=1	ZFAND5	23.132	8.5	5	1	1	1	0	1	1	1	1	1	0	1	1	1	1	1	0	1	1	1	1	1	0	1	1	1	1	1		2315.2	1755.5	1890.5	3312	2513.5	0	0	0	0	0	0
O76094	Signal recognition particle subunit SRP72 OS=Homo sapiens OX=9606 GN=SRP72 PE=1 SV=3	SRP72	74.605	43.4	81	19	19	19	13	15	13	15	12	13	14	16	15	16	15	16	14	16	15	16	15	16	14	16	15	16	15	16	63314	60630	49082	70788	59793	59801	295510	262680	269850	291790	243320	255750	1.09522	0.97355	1.00012	1.08144	0.901798
O94760	N(G),N(G)-dimethylarginine dimethylaminohydrolase 1 OS=Homo sapiens OX=9606 GN=DDAH1 PE=1 SV=3	DDAH1	31.121	34.4	25	7	7	7	5	4	4	4	4	4	7	7	6	6	6	6	7	7	6	6	6	6	7	7	6	6	6	6	27960	20211	17985	20947	19404	14226	116210	84299	82846	93486	80128	67644	1.32909	0.964128	0.94751	1.0692	0.916424
O94762	ATP-dependent DNA helicase Q5 OS=Homo sapiens OX=9606 GN=RECQL5 PE=1 SV=2	RECQL5	108.86	4.3	3	3	3	3	2	1	0	0	0	0	3	2	1	2	1	1	3	2	1	2	1	1	3	2	1	2	1	1	3383.8	537.33	581.98	664.88	377.02	390.84	117400	49288	0	0	0	0	1.40862	0.59138
O94763	Unconventional prefoldin RPB5 interactor 1 OS=Homo sapiens OX=9606 GN=URI1 PE=1 SV=3	URI1	59.832	5.2	7	2	2	2	2	1	1	1	1	1	1	2	2	1	1	2	1	2	2	1	1	2	1	2	2	1	1	2	889.25	1917.7	1781.3	972.68	894.85	1307	18979	15720	16623	18968	18320	0	1.07093	0.887033	0.937987	1.07031	1.03374
O94766	Galactosylgalactosylxylosylprotein 3-beta-glucuronosyltransferase 3 OS=Homo sapiens OX=9606 GN=B3GAT3 PE=1 SV=2	B3GAT3	37.121	35.2	29	7	7	7	3	5	4	6	5	6	4	7	4	6	5	6	4	7	4	6	5	6	4	7	4	6	5	6	17747	21214	16017	22713	19586	19507	87613	85033	86560	98694	91205	91343	0.972671	0.944028	0.960981	1.09569	1.01255
O94768	Serine/threonine-protein kinase 17B OS=Homo sapiens OX=9606 GN=STK17B PE=1 SV=1	STK17B	42.344	4	2	1	1	1	0	0	1	1	0	0	1	1	1	1	1	0	1	1	1	1	1	0	1	1	1	1	1	0	933.18	1099.4	1059	1277.7	1193.6		0	0	0	0	0	0
O94776	Metastasis-associated protein MTA2 OS=Homo sapiens OX=9606 GN=MTA2 PE=1 SV=1	MTA2	75.022	50	107	23	21	23	18	18	18	15	21	17	21	21	20	19	21	21	19	19	18	17	19	19	21	21	20	19	21	21	60445	61957	58677	50216	64877	68228	333630	342400	338240	331940	364360	383850	0.955768	0.980892	0.968975	0.950927	1.0438
O94804	Serine/threonine-protein kinase 10 OS=Homo sapiens OX=9606 GN=STK10 PE=1 SV=1	STK10	112.13	17.7	60	13	12	12	9	10	12	9	9	11	10	12	12	11	11	12	10	11	11	11	10	11	10	11	11	11	10	11	13699	20380	17698	13738	16870	15995	148090	189140	177190	137590	189670	165820	0.881926	1.12639	1.05523	0.819395	1.12955
O94808	Glutamine--fructose-6-phosphate aminotransferase [isomerizing] 2 OS=Homo sapiens OX=9606 GN=GFPT2 PE=1 SV=3	GFPT2	76.93	38.6	61	19	15	15	6	12	13	6	12	12	14	19	18	14	19	19	10	15	14	10	15	15	10	15	14	10	15	15	8872	32540	21696	7578.3	35604	36092	89536	231090	187110	92143	255990	293570	0.467372	1.20627	0.976703	0.480981	1.33625
O94817	Ubiquitin-like protein ATG12 OS=Homo sapiens OX=9606 GN=ATG12 PE=1 SV=1	ATG12	15.113	17.1	10	3	3	3	3	2	1	1	1	2	3	3	1	1	2	2	3	3	1	1	2	2	3	3	1	1	2	2	21200	17779	4492	10559	12872	13094	32972	26468	0	0	23672	27220	1.19537	0.959577			0.85821
O94822	E3 ubiquitin-protein ligase listerin OS=Homo sapiens OX=9606 GN=LTN1 PE=1 SV=6	LTN1	200.55	13.3	67	17	17	17	10	15	11	9	11	11	12	15	15	11	16	14	12	15	15	11	16	14	12	15	15	11	16	14	3721.3	4941.2	4419.2	2776.6	5121.4	3972.8	61211	73412	69232	57222	70997	68375	0.917136	1.09994	1.03732	0.857368	1.06376
O94826	Mitochondrial import receptor subunit TOM70 OS=Homo sapiens OX=9606 GN=TOMM70 PE=1 SV=1	TOMM70	67.454	52.8	114	20	20	20	20	20	19	16	21	18	20	19	17	18	20	18	20	19	17	18	20	18	20	19	17	18	20	18	152020	154190	119280	147920	151750	124100	1208400	971030	963990	1202300	1003200	927430	1.15519	0.928275	0.921545	1.14936	0.959029
O94829	Importin-13 OS=Homo sapiens OX=9606 GN=IPO13 PE=1 SV=3	IPO13	108.19	4.4	9	3	3	3	1	1	2	1	4	0	3	3	3	3	3	3	3	3	3	3	3	3	3	3	3	3	3	3	4326.8	4597	3729.4	5272.3	4700.6	3759.6	108000	112490	86768	113670	93821	90331	1.07093	1.11546	0.860395	1.12716	0.930333
O94832	Unconventional myosin-Id OS=Homo sapiens OX=9606 GN=MYO1D PE=1 SV=2	MYO1D	116.2	28.4	85	20	20	20	15	14	14	17	12	13	18	17	17	20	15	17	18	17	17	20	15	17	18	17	17	20	15	17	15706	10250	8550	16109	7214.6	7626.6	120830	79422	76736	117150	61306	63266	1.39766	0.918687	0.887617	1.35509	0.709136
O94842	TOX high mobility group box family member 4 OS=Homo sapiens OX=9606 GN=TOX4 PE=1 SV=1	TOX4	66.194	6.4	11	3	3	3	1	0	3	2	2	3	3	3	3	2	3	3	3	3	3	2	3	3	3	3	3	2	3	3	6952.1	8346.8	9161.1	6236.7	8528.9	8208.9	65831	82510	118400	76603	102290	109030	0.712118	0.89254	1.28077	0.828642	1.10651
O94851	[F-actin]-monooxygenase MICAL2 OS=Homo sapiens OX=9606 GN=MICAL2 PE=1 SV=1	MICAL2	126.69	11.4	25	10	9	9	2	5	6	2	5	5	6	8	9	6	9	8	5	7	8	5	8	7	5	7	8	5	8	7	4142.5	5711.4	4052.3	2149.1	6737.7	2920.2	97390	104340	103870	85669	131630	119300	0.909905	0.974838	0.970447	0.800397	1.22981
O94855	Protein transport protein Sec24D OS=Homo sapiens OX=9606 GN=SEC24D PE=1 SV=2	SEC24D	113.01	24	80	18	18	18	12	14	12	14	14	14	14	13	13	13	16	14	14	13	13	13	16	14	14	13	13	13	16	14	24032	20842	22492	29364	30473	26478	148020	160990	156010	158920	175400	192170	0.895725	0.974211	0.944075	0.961685	1.06141
O94864	STAGA complex 65 subunit gamma OS=Homo sapiens OX=9606 GN=SUPT7L PE=1 SV=1	SUPT7L	46.192	9.9	21	3	3	3	3	4	4	3	4	3	3	3	3	3	3	3	3	3	3	3	3	3	3	3	3	3	3	3	4059.2	6702.4	5641.1	4059.8	6276.7	5033	21239	28556	28411	19631	31305	26708	0.817671	1.09936	1.09378	0.755765	1.2052
O94874	E3 UFM1-protein ligase 1 OS=Homo sapiens OX=9606 GN=UFL1 PE=1 SV=2	UFL1	89.594	32.1	65	18	18	18	14	9	10	11	10	11	18	13	14	15	15	15	18	13	14	15	15	15	18	13	14	15	15	15	58727	46425	46194	57696	51685	50366	1943000	1380700	1386900	1842000	1370200	1471600	1.24095	0.881823	0.885783	1.17645	0.875117
O94880	PHD finger protein 14 OS=Homo sapiens OX=9606 GN=PHF14 PE=1 SV=2	PHF14	100.05	10.2	20	6	6	6	4	3	3	3	4	3	5	4	6	4	5	3	5	4	6	4	5	3	5	4	6	4	5	3	3199.5	6272.3	3264.5	3439	7665.4	5261.1	77488	110070	85471	66144	99253	124560	0.825825	1.17307	0.910904	0.704927	1.05778
O94886	CSC1-like protein 1 OS=Homo sapiens OX=9606 GN=TMEM63A PE=1 SV=3	TMEM63A	92.125	3.8	17	3	3	3	3	2	2	4	4	2	1	1	1	2	2	1	1	1	1	2	2	1	1	1	1	2	2	1	110710	103780	115020	122690	99440	96005	3406600	3154800	3635000	3720000	3317400	763970	1.13567	1.05173	1.21182	1.24015	1.10594
O94887	FERM, ARHGEF and pleckstrin domain-containing protein 2 OS=Homo sapiens OX=9606 GN=FARP2 PE=1 SV=3	FARP2	119.89	3.4	5	3	3	3	2	0	0	2	1	0	3	1	2	2	2	3	3	1	2	2	2	3	3	1	2	2	2	3	1056.9	613.52	887.38	1027.8	789.52	1084.2	40919	0	0	62369	32402	27828	1.00097			1.52568	0.792622
O94888	UBX domain-containing protein 7 OS=Homo sapiens OX=9606 GN=UBXN7 PE=1 SV=2	UBXN7	54.862	23.3	46	7	7	7	6	8	8	7	9	8	6	7	6	6	7	6	6	7	6	6	7	6	6	7	6	6	7	6	29409	27312	25063	32754	24124	25587	179020	155250	155570	191260	136750	151430	1.10816	0.961023	0.963003	1.18393	0.846505
O94901	SUN domain-containing protein 1 OS=Homo sapiens OX=9606 GN=SUN1 PE=1 SV=4	SUN1	87.109	34.4	101	18	18	18	17	15	18	16	18	17	17	15	16	15	17	17	17	15	16	15	17	17	17	15	16	15	17	17	22868	21662	20322	21541	22443	20917	141920	122270	119160	152320	137730	136610	1.05125	0.905693	0.882656	1.12828	1.02021
O94903	Pyridoxal phosphate homeostasis protein OS=Homo sapiens OX=9606 GN=PLPBP PE=1 SV=1	PLPBP	30.344	16.7	20	4	4	4	3	4	4	3	3	3	3	4	3	3	4	4	3	4	3	3	4	4	3	4	3	3	4	4	34430	35241	24742	35042	28166	24079	200080	173480	163030	224890	154470	142680	1.13399	0.983233	0.924006	1.27461	0.87549
O94905	Erlin-2 OS=Homo sapiens OX=9606 GN=ERLIN2 PE=1 SV=1	ERLIN2	37.839	37.5	46	9	8	9	7	8	10	8	6	7	7	8	8	8	6	8	6	7	7	7	5	7	7	8	8	8	6	8	74165	68793	61445	75879	57615	58761	496180	415510	417700	519770	406540	404430	1.11915	0.937195	0.942134	1.17236	0.916963
O94906	Pre-mRNA-processing factor 6 OS=Homo sapiens OX=9606 GN=PRPF6 PE=1 SV=1	PRPF6	106.92	32.2	124	25	25	25	19	20	24	20	20	21	25	23	24	23	22	24	25	23	24	23	22	24	25	23	24	23	22	24	30736	33521	33334	30709	31965	32858	154190	153030	159850	169950	160250	166860	0.959559	0.95234	0.994783	1.05764	0.997272
O94913	Pre-mRNA cleavage complex 2 protein Pcf11 OS=Homo sapiens OX=9606 GN=PCF11 PE=1 SV=3	PCF11	173.05	9.1	33	9	9	9	4	6	6	5	6	6	4	7	6	6	8	8	4	7	6	6	8	8	4	7	6	6	8	8	900.86	1190.1	1045.7	973.9	1223.6	1081	24532	26575	26423	23731	29804	24757	0.944616	1.02328	1.01743	0.913773	1.14762
O94915	Protein furry homolog-like OS=Homo sapiens OX=9606 GN=FRYL PE=1 SV=2	FRYL	339.59	19.9	169	42	41	42	28	31	30	26	31	23	36	37	35	38	35	37	36	36	34	38	34	36	36	37	35	38	35	37	12842	12721	12006	13063	11098	11953	123920	132730	134390	122840	117700	128040	0.978805	1.04839	1.0615	0.970275	0.929675
O94916	Nuclear factor of activated T-cells 5 OS=Homo sapiens OX=9606 GN=NFAT5 PE=1 SV=1	NFAT5	165.76	1.8	7	2	2	2	1	2	1	1	1	1	1	2	1	1	1	2	1	2	1	1	1	2	1	2	1	1	1	2	224.58	418.13	317.55	343.23	323.14	454.43	0	12295	0	0	0	11037		1.05392
O94919	Endonuclease domain-containing 1 protein OS=Homo sapiens OX=9606 GN=ENDOD1 PE=1 SV=2	ENDOD1	55.016	33.2	86	13	13	13	13	14	15	15	14	15	13	13	12	13	13	12	13	13	12	13	13	12	13	13	12	13	13	12	138510	112810	109940	118390	112040	101820	691210	568260	614840	646810	543020	561230	1.14396	0.940472	1.01756	1.07047	0.8987
O94925	Glutaminase kidney isoform, mitochondrial OS=Homo sapiens OX=9606 GN=GLS PE=1 SV=1	GLS	73.46	54.3	169	27	27	27	27	33	28	22	30	29	24	27	25	24	25	24	24	27	25	24	25	24	24	27	25	24	25	24	152260	424020	269270	144180	285490	310560	631260	1542000	1158800	557610	1162600	1273200	0.598779	1.46266	1.09918	0.528919	1.10278
O94927	HAUS augmin-like complex subunit 5 OS=Homo sapiens OX=9606 GN=HAUS5 PE=1 SV=2	HAUS5	71.682	9	12	4	4	4	3	1	2	3	2	1	3	3	3	3	4	3	3	3	3	3	4	3	3	3	3	3	4	3	3198.1	1390.7	1620.5	4354.3	3462.9	3080.1	57952	49460	62255	77337	52704	54412	0.981904	0.838021	1.05481	1.31035	0.892985
O94929	Actin-binding LIM protein 3 OS=Homo sapiens OX=9606 GN=ABLIM3 PE=1 SV=3	ABLIM3	77.801	13.9	18	7	7	7	4	2	3	4	1	4	4	3	4	6	4	5	4	3	4	6	4	5	4	3	4	6	4	5	4703.1	1118.9	2351.9	4001.1	2564.4	3042.4	85286	26337	44514	54297	42330	40564	1.74452	0.538721	0.91053	1.11064	0.865857
O94952	F-box only protein 21 OS=Homo sapiens OX=9606 GN=FBXO21 PE=2 SV=2	FBXO21	72.269	3.7	2	1	1	1	0	1	0	0	1	0	0	1	1	0	1	0	0	1	1	0	1	0	0	1	1	0	1	0		457.46	299.25		472.14		0	0	0	0	0	0
O94953	Lysine-specific demethylase 4B OS=Homo sapiens OX=9606 GN=KDM4B PE=1 SV=4	KDM4B	121.9	2.9	9	2	2	2	0	2	1	2	2	2	1	2	2	2	2	2	1	2	2	2	2	2	1	2	2	2	2	2	311.42	582.6	358.12	647.04	690.69	689.16	0	16588	12263	22877	22163	26183		0.828787	0.612697	1.143	1.10733
O94966	Ubiquitin carboxyl-terminal hydrolase 19 OS=Homo sapiens OX=9606 GN=USP19 PE=1 SV=2	USP19	145.65	9.9	20	8	8	8	2	4	3	3	3	5	4	4	4	4	4	5	4	4	4	4	4	5	4	4	4	4	4	5	1068.8	1457.2	2061.5	2071.8	2465.8	2866.7	39391	52575	52574	52277	52360	47093	0.797739	1.06474	1.06472	1.0587	1.06038
O94967	WD repeat-containing protein 47 OS=Homo sapiens OX=9606 GN=WDR47 PE=1 SV=1	WDR47	101.95	1.5	2	1	1	1	0	1	0	0	0	1	0	1	1	0	1	1	0	1	1	0	1	1	0	1	1	0	1	1		138.26	105.45		62.616	78.364	0	0	0	0	0	0
O94973	AP-2 complex subunit alpha-2 OS=Homo sapiens OX=9606 GN=AP2A2 PE=1 SV=2	AP2A2	103.96	42.6	160	29	22	29	26	26	25	28	29	26	26	25	25	25	28	24	21	19	19	19	22	19	26	25	25	25	28	24	62420	67300	52692	72942	72433	48564	356230	329720	321520	380870	342660	326960	1.03859	0.961301	0.937394	1.11043	0.999028
O94979	Protein transport protein Sec31A OS=Homo sapiens OX=9606 GN=SEC31A PE=1 SV=3	SEC31A	133.01	32.5	158	27	27	27	23	26	29	26	28	26	25	25	27	25	24	25	25	25	27	25	24	25	25	25	27	25	24	25	81788	87450	82433	85180	80406	86518	492770	450960	466160	484910	466200	502060	1.03268	0.945059	0.976913	1.01621	0.976997
O94992	Protein HEXIM1 OS=Homo sapiens OX=9606 GN=HEXIM1 PE=1 SV=1	HEXIM1	40.623	19.5	13	4	4	4	2	1	2	2	4	2	4	3	3	3	4	3	4	3	3	3	4	3	4	3	3	3	4	3	19464	21717	19198	20396	24708	21142	86697	115770	108500	110720	113770	115140	0.799546	1.06767	1.00062	1.02109	1.04922
O95049	Tight junction protein ZO-3 OS=Homo sapiens OX=9606 GN=TJP3 PE=1 SV=3	TJP3	101.4	7.4	9	5	4	5	2	2	0	2	2	1	4	2	3	4	2	2	3	2	3	4	2	2	4	2	3	4	2	2	3143.7	810.29	2161.5	4455.5	2439.2	1745.5	85097	59637	46199	141000	64718	37754	1.17536	0.823706	0.6381	1.94749	0.893885
O95059	Ribonuclease P protein subunit p14 OS=Homo sapiens OX=9606 GN=RPP14 PE=1 SV=3	RPP14	13.693	21.8	2	2	2	2	1	0	0	1	0	0	1	2	1	1	1	1	1	2	1	1	1	1	1	2	1	1	1	1	683.25	2500.2	1693.7	1307.9	1696.7	1546.7	0	0	0	0	0	0
O95067	G2/mitotic-specific cyclin-B2 OS=Homo sapiens OX=9606 GN=CCNB2 PE=1 SV=1	CCNB2	45.281	17.6	11	6	5	6	0	2	3	0	2	4	1	4	3	1	5	5	1	3	2	1	4	4	1	4	3	1	5	5	4208.1	9945.8	8136.2	3872.6	8570.3	11977	0	130090	106560	0	117980	117400		1.10239	0.902993		0.999767
O95070	Protein YIF1A OS=Homo sapiens OX=9606 GN=YIF1A PE=1 SV=2	YIF1A	32.011	9.2	4	2	2	2	2	0	0	1	0	1	2	1	1	1	2	2	2	1	1	1	2	2	2	1	1	1	2	2	14371	8288.7	10054	9061.7	16259	22504	64802	0	0	0	89968	111260	0.730767				1.01456
O95071	E3 ubiquitin-protein ligase UBR5 OS=Homo sapiens OX=9606 GN=UBR5 PE=1 SV=2	UBR5	309.35	10.2	74	18	18	18	8	15	12	8	16	15	13	17	17	15	17	17	13	17	17	15	17	17	13	17	17	15	17	17	2084.4	3810.5	3141.8	2641.2	3471.1	3557.1	59994	85308	75530	66978	81093	85659	0.791892	1.12603	0.99696	0.884077	1.07039
O95081	Arf-GAP domain and FG repeat-containing protein 2 OS=Homo sapiens OX=9606 GN=AGFG2 PE=1 SV=2	AGFG2	48.962	11.2	10	4	4	4	2	3	1	2	1	1	3	4	3	3	3	3	3	4	3	3	3	3	3	4	3	3	3	3	5935.1	17751	7309	7505	7699.3	7238.8	46901	77837	63593	60745	64179	63178	0.747559	1.24065	1.01361	0.96822	1.02296
O95104	SR-related and CTD-associated factor 4 OS=Homo sapiens OX=9606 GN=SCAF4 PE=1 SV=3	SCAF4	125.87	16.9	41	11	9	11	7	9	5	5	7	8	8	9	8	7	10	9	7	7	6	6	8	8	8	9	8	7	10	9	12850	14301	12972	12122	15009	12603	155360	154180	168280	158980	160020	157560	0.976718	0.969299	1.05794	0.999476	1.00601
O95139	NADH dehydrogenase [ubiquinone] 1 beta subcomplex subunit 6 OS=Homo sapiens OX=9606 GN=NDUFB6 PE=1 SV=3	NDUFB6	15.489	24.2	14	2	2	2	2	3	3	2	2	2	2	2	2	2	2	2	2	2	2	2	2	2	2	2	2	2	2	2	109370	106450	95120	77769	97170	100500	551410	517710	510190	450420	497220	539050	1.07908	1.01313	0.998415	0.881448	0.973033
O95140	Mitofusin-2 OS=Homo sapiens OX=9606 GN=MFN2 PE=1 SV=3	MFN2	86.401	11.5	25	6	6	6	3	4	5	5	4	4	5	6	6	5	5	6	5	6	6	5	5	6	5	6	6	5	5	6	3981.3	5415.6	4227	3510.5	4892.8	5147.8	55098	55933	46569	48445	65947	58254	1.00104	1.01621	0.846078	0.880162	1.19814
O95149	Snurportin-1 OS=Homo sapiens OX=9606 GN=SNUPN PE=1 SV=1	SNUPN	41.142	6.9	6	2	2	2	0	1	2	0	1	2	1	2	2	1	1	2	1	2	2	1	1	2	1	2	2	1	1	2	7847.7	6638.5	6634.3	6257.4	1076.4	5677.2	0	88017	87768	0	0	87855		1.00156	0.998726
O95155	Ubiquitin conjugation factor E4 B OS=Homo sapiens OX=9606 GN=UBE4B PE=1 SV=1	UBE4B	146.18	16.3	62	13	13	13	10	10	12	11	8	11	11	11	12	11	12	11	11	11	12	11	12	11	11	11	12	11	12	11	15473	15634	14404	15021	16410	15467	462070	510430	530910	436640	532290	593670	0.904244	0.998881	1.03896	0.854479	1.04166
O95159	Zinc finger protein-like 1 OS=Homo sapiens OX=9606 GN=ZFPL1 PE=1 SV=2	ZFPL1	34.114	27.4	58	11	11	11	11	10	10	8	10	9	11	10	11	10	11	8	11	10	11	10	11	8	11	10	11	10	11	8	56068	47581	45019	49461	46972	36507	133010	110990	108140	131160	110010	115180	1.12642	0.939943	0.915807	1.11076	0.931643
O95163	Elongator complex protein 1 OS=Homo sapiens OX=9606 GN=ELP1 PE=1 SV=3	ELP1	150.25	22.5	91	19	19	19	14	18	16	13	14	16	16	19	17	16	18	16	16	19	17	16	18	16	16	19	17	16	18	16	14863	19835	18676	15448	20064	18543	137850	175540	177070	136290	180810	181360	0.836367	1.06504	1.07432	0.826902	1.09702
O95166	Gamma-aminobutyric acid receptor-associated protein OS=Homo sapiens OX=9606 GN=GABARAP PE=1 SV=1	GABARAP	13.918	15.4	7	2	1	1	1	1	1	1	1	2	2	2	2	2	2	2	1	1	1	1	1	1	1	1	1	1	1	1	49549	42247	18389	47803	42844	39794	78332	70315	0	77568	71641	70027
O95167	NADH dehydrogenase [ubiquinone] 1 alpha subcomplex subunit 3 OS=Homo sapiens OX=9606 GN=NDUFA3 PE=1 SV=1	NDUFA3	9.2787	41.7	7	2	2	2	1	1	1	1	1	2	1	2	2	1	1	2	1	2	2	1	1	2	1	2	2	1	1	2	65053	76874	74493	56038	64898	79866	0	193600	243170	0	0	331050		0.756427	0.950105
O95168	NADH dehydrogenase [ubiquinone] 1 beta subcomplex subunit 4 OS=Homo sapiens OX=9606 GN=NDUFB4 PE=1 SV=3	NDUFB4	15.208	30.2	11	3	3	3	1	1	2	2	2	3	2	2	3	3	2	3	2	2	3	3	2	3	2	2	3	3	2	3	55329	51199	104590	77587	49224	113580	202150	186100	196890	187120	176600	211230	1.04552	0.962512	1.01832	0.967787	0.913377
O95169	NADH dehydrogenase [ubiquinone] 1 beta subcomplex subunit 8, mitochondrial OS=Homo sapiens OX=9606 GN=NDUFB8 PE=1 SV=1	NDUFB8	21.766	30.1	19	4	4	4	3	3	4	3	3	3	4	4	4	4	4	4	4	4	4	4	4	4	4	4	4	4	4	4	67389	56942	53472	58271	53849	54505	208430	169870	170090	177930	156360	172920	1.18471	0.965536	0.966787	1.01135	0.888746
O95171	Sciellin OS=Homo sapiens OX=9606 GN=SCEL PE=1 SV=2	SCEL	77.551	16.3	18	8	8	8	2	4	4	1	5	2	8	6	7	5	6	4	8	6	7	5	6	4	8	6	7	5	6	4	2579.6	2438.6	3166.1	1639.7	3337.5	1597.3	24995	33640	33672	27264	38352	23530	0.826495	1.11235	1.11341	0.901523	1.26816
O95182	NADH dehydrogenase [ubiquinone] 1 alpha subcomplex subunit 7 OS=Homo sapiens OX=9606 GN=NDUFA7 PE=1 SV=3	NDUFA7	12.551	18.6	7	2	2	2	0	1	2	1	2	1	1	1	2	1	2	2	1	1	2	1	2	2	1	1	2	1	2	2	8944.1	6893.6	8304.2	9174.5	6865.9	6557	0	0	60809	0	41391	36278			1.31737		0.896698
O95183	Vesicle-associated membrane protein 5 OS=Homo sapiens OX=9606 GN=VAMP5 PE=1 SV=1	VAMP5	12.805	23.3	11	3	3	3	2	2	2	2	2	1	3	3	3	3	3	2	3	3	3	3	3	2	3	3	3	3	3	2	22179	24293	22972	24301	25042	19390	86287	109350	132310	92858	101480	99857	0.832161	1.05458	1.27601	0.895532	0.978683
O95197	Reticulon-3 OS=Homo sapiens OX=9606 GN=RTN3 PE=1 SV=2	RTN3	112.61	6	19	3	3	3	3	4	3	3	3	3	2	3	2	2	3	2	2	3	2	2	3	2	2	3	2	2	3	2	27939	24330	23063	28924	25091	24224	895280	782520	770730	962760	785160	825800	1.06958	0.934864	0.920779	1.15019	0.938018
O95202	Mitochondrial proton/calcium exchanger protein OS=Homo sapiens OX=9606 GN=LETM1 PE=1 SV=1	LETM1	83.353	47.1	149	29	29	29	29	26	26	24	22	22	28	26	25	26	24	25	28	26	25	26	24	25	28	26	25	26	24	25	148480	120140	118780	136790	117650	116420	633520	495140	517010	593760	480170	459580	1.19563	0.934467	0.975742	1.12059	0.906215
O95208	Epsin-2 OS=Homo sapiens OX=9606 GN=EPN2 PE=1 SV=3	EPN2	68.481	20.4	17	7	7	7	4	4	2	5	1	1	7	6	3	6	3	3	7	6	3	6	3	3	7	6	3	6	3	3	15801	22286	16244	12951	2809.9	11298	206680	223890	258170	211740	165620	133430	1.03381	1.11989	1.29136	1.05912	0.828424
O95210	Starch-binding domain-containing protein 1 OS=Homo sapiens OX=9606 GN=STBD1 PE=1 SV=1	STBD1	39.007	17.9	19	5	5	5	3	3	3	3	3	4	4	3	4	3	3	4	4	3	4	3	3	4	4	3	4	3	3	4	7565	6044.7	5911.9	6716.4	6990.3	34201	217450	174220	174030	200990	224920	202300	1.0928	0.875543	0.874589	1.01008	1.13034
O95218	Zinc finger Ran-binding domain-containing protein 2 OS=Homo sapiens OX=9606 GN=ZRANB2 PE=1 SV=2	ZRANB2	37.404	23.6	25	7	7	7	4	4	2	5	5	5	6	6	6	6	7	6	6	6	6	6	7	6	6	6	6	6	7	6	28217	28304	24744	33272	40589	28057	174340	182060	180420	217470	182350	192610	0.926314	0.967332	0.958619	1.15548	0.968873
O95219	Sorting nexin-4 OS=Homo sapiens OX=9606 GN=SNX4 PE=1 SV=1	SNX4	51.908	33.3	40	11	11	11	6	5	6	9	6	8	9	8	10	11	9	9	9	8	10	11	9	9	9	8	10	11	9	9	14301	13246	16270	22856	14137	12675	100270	92480	93139	123520	92768	89628	1.01659	0.937606	0.944287	1.2523	0.940526
O95232	Luc7-like protein 3 OS=Homo sapiens OX=9606 GN=LUC7L3 PE=1 SV=2	LUC7L3	51.466	23.1	47	8	8	8	8	8	8	7	8	8	7	8	8	7	8	8	7	8	8	7	8	8	7	8	8	7	8	8	62124	69386	66981	56471	62873	60945	381410	387400	404730	363730	360940	389840	1.00018	1.01589	1.06133	0.953817	0.9465
O95235	Kinesin-like protein KIF20A OS=Homo sapiens OX=9606 GN=KIF20A PE=1 SV=1	KIF20A	100.28	6.6	10	5	5	5	1	3	1	0	2	3	1	3	1	0	3	3	1	3	1	0	3	3	1	3	1	0	3	3	4351	430.81	138.7		457.1	566.24	0	9621	0	0	10343	11552		0.915821			0.984548
O95239	Chromosome-associated kinesin KIF4A OS=Homo sapiens OX=9606 GN=KIF4A PE=1 SV=3	KIF4A	139.88	22.9	65	20	19	20	4	16	11	3	17	14	8	18	18	7	19	16	8	17	17	7	18	15	8	18	18	7	19	16	3739.7	16695	12778	2751.6	15343	13550	32687	131050	121600	26946	134510	154030	0.326422	1.30871	1.21433	0.269091	1.34326
O95248	Myotubularin-related protein 5 OS=Homo sapiens OX=9606 GN=SBF1 PE=1 SV=4	SBF1	208.44	5.8	29	7	6	7	4	4	4	7	5	5	6	6	6	7	7	5	5	5	5	6	6	4	6	6	6	7	7	5	1624.9	1476.4	1583.1	1977.9	1941.5	1392.2	41905	37436	38897	47216	41418	41833	1.01096	0.903142	0.938389	1.13908	0.999208
O95249	Golgi SNAP receptor complex member 1 OS=Homo sapiens OX=9606 GN=GOSR1 PE=1 SV=1	GOSR1	28.612	13.6	15	3	3	3	3	2	2	3	2	3	3	3	2	3	3	3	3	3	2	3	3	3	3	3	2	3	3	3	17932	17149	12208	13828	15993	15139	116490	112710	101410	97335	104540	111770	1.08488	1.04968	0.94444	0.906489	0.97359
O95251	Histone acetyltransferase KAT7 OS=Homo sapiens OX=9606 GN=KAT7 PE=1 SV=1	KAT7	70.642	5.2	4	2	2	2	1	1	1	0	0	1	1	2	1	0	2	1	1	2	1	0	2	1	1	2	1	0	2	1	491.68	1016.8	126.71		1377	864.42	0	0	0	0	0	0
O95260	Arginyl-tRNA--protein transferase 1 OS=Homo sapiens OX=9606 GN=ATE1 PE=1 SV=2	ATE1	59.09	5.6	7	2	2	2	1	1	2	1	1	1	1	2	2	1	2	2	1	2	2	1	2	2	1	2	2	1	2	2	2677	9468.5	9578	2663.5	8728.4	8630.6	0	152680	172050	0	146050	154660		0.976465	1.10034		0.934062
O95273	Cyclin-D1-binding protein 1 OS=Homo sapiens OX=9606 GN=CCNDBP1 PE=1 SV=2	CCNDBP1	40.262	15.6	13	4	4	4	2	3	1	3	2	2	3	3	2	3	2	4	3	3	2	3	2	4	3	3	2	3	2	4	5587.6	6974.2	4240.5	4124.7	3095.1	14349	46731	58905	50478	39249	49271	41056	0.981434	1.23711	1.06013	0.824299	1.03478
O95292	Vesicle-associated membrane protein-associated protein B/C OS=Homo sapiens OX=9606 GN=VAPB PE=1 SV=3	VAPB	27.228	35	27	7	6	6	5	5	4	4	4	5	7	7	5	7	6	7	6	6	4	6	5	6	6	6	4	6	5	6	145940	138070	106540	148340	130560	127060	969350	875280	884880	1033200	868480	882590	1.05483	0.952465	0.962911	1.12431	0.945065
O95295	SNARE-associated protein Snapin OS=Homo sapiens OX=9606 GN=SNAPIN PE=1 SV=1	SNAPIN	14.874	52.2	16	5	5	5	2	4	2	3	3	2	4	5	3	4	3	3	4	5	3	4	3	3	4	5	3	4	3	3	32687	29548	28013	25717	18677	25785	136810	111030	123730	134290	114260	114140	1.11794	0.907281	1.01106	1.09735	0.933675
O95297	Myelin protein zero-like protein 1 OS=Homo sapiens OX=9606 GN=MPZL1 PE=1 SV=1	MPZL1	29.082	27.5	23	5	5	5	5	3	4	3	4	4	5	4	5	5	5	5	5	4	5	5	5	5	5	4	5	5	5	5	38567	31522	38282	35805	37756	36255	142770	128120	142000	134580	129870	140210	1.04779	0.940273	1.04214	0.987683	0.953116
O95298	NADH dehydrogenase [ubiquinone] 1 subunit C2 OS=Homo sapiens OX=9606 GN=NDUFC2 PE=1 SV=1	NDUFC2	14.187	17.6	15	2	2	2	3	3	1	3	3	2	2	2	2	2	2	2	2	2	2	2	2	2	2	2	2	2	2	2	57491	46765	39484	47985	46543	43286	238280	182420	167340	194640	183790	185830	1.24072	0.949857	0.871336	1.01349	0.95699
O95299	NADH dehydrogenase [ubiquinone] 1 alpha subcomplex subunit 10, mitochondrial OS=Homo sapiens OX=9606 GN=NDUFA10 PE=1 SV=1	NDUFA10	40.75	22.3	24	6	6	6	4	4	3	6	4	3	6	6	5	6	6	5	6	6	5	6	6	5	6	6	5	6	6	5	39412	36368	32519	38451	33841	28887	299920	257530	264200	292540	252430	229350	1.12754	0.968176	0.993252	1.0998	0.949003
O95302	Peptidyl-prolyl cis-trans isomerase FKBP9 OS=Homo sapiens OX=9606 GN=FKBP9 PE=1 SV=2	FKBP9	63.083	18.8	27	7	6	6	3	6	5	4	4	5	4	6	4	4	4	5	3	5	3	3	3	4	3	5	3	3	3	4	263210	272520	269180	302030	281050	280380	2932700	3008400	3061100	2868700	3359900	3417900	0.943562	0.967917	0.984873	0.922971	1.08101
O95336	6-phosphogluconolactonase OS=Homo sapiens OX=9606 GN=PGLS PE=1 SV=2	PGLS	27.547	62	73	11	11	11	11	12	15	12	11	12	11	10	11	11	11	11	11	10	11	11	11	11	11	10	11	11	11	11	340150	290830	309850	339680	279700	282940	613680	463490	498970	640050	481550	514600	1.14623	0.865705	0.931975	1.19548	0.899438
O95340	Bifunctional 3'-phosphoadenosine 5'-phosphosulfate synthase 2 OS=Homo sapiens OX=9606 GN=PAPSS2 PE=1 SV=2	PAPSS2	69.5	35.5	97	18	17	18	15	16	17	13	18	18	14	16	16	13	17	17	13	15	15	13	16	16	14	16	16	13	17	17	64512	71579	67331	48553	73898	69248	253030	247100	249090	209390	249300	259250	1.03478	1.01052	1.01866	0.856307	1.01952
O95347	Structural maintenance of chromosomes protein 2 OS=Homo sapiens OX=9606 GN=SMC2 PE=1 SV=2	SMC2	135.65	28.4	112	27	27	27	20	18	18	17	17	22	24	26	23	24	24	25	24	26	23	24	24	25	24	26	23	24	24	25	22096	26628	26962	20914	26726	31152	246110	300870	320800	231910	300690	352390	0.842472	1.02992	1.09815	0.793863	1.02931
O95352	Ubiquitin-like modifier-activating enzyme ATG7 OS=Homo sapiens OX=9606 GN=ATG7 PE=1 SV=1	ATG7	77.959	36.6	76	17	17	17	13	13	12	14	13	11	16	15	15	17	15	14	16	15	15	17	15	14	16	15	15	17	15	14	38619	31810	27897	36279	28573	25414	237060	194730	181730	214340	169090	172280	1.21649	0.999273	0.932562	1.0999	0.867699
O95359	Transforming acidic coiled-coil-containing protein 2 OS=Homo sapiens OX=9606 GN=TACC2 PE=1 SV=3	TACC2	309.42	2.1	16	5	4	4	2	3	3	3	3	2	4	5	4	4	5	5	3	4	4	3	4	4	3	4	4	3	4	4	847.17	1175.9	1069.5	981.94	958.89	960.1	46583	47895	47645	50570	42031	47219	0.991328	1.01925	1.01393	1.07618	0.894457
O95361	Tripartite motif-containing protein 16 OS=Homo sapiens OX=9606 GN=TRIM16 PE=1 SV=3	TRIM16	63.954	42.9	92	19	19	19	13	16	14	15	17	17	15	17	17	17	18	18	15	17	17	17	18	18	15	17	17	17	18	18	29315	36855	37738	33315	46251	35430	119530	119440	122550	140680	164870	160040	0.867091	0.866439	0.888999	1.02052	1.196
O95363	Phenylalanine--tRNA ligase, mitochondrial OS=Homo sapiens OX=9606 GN=FARS2 PE=1 SV=1	FARS2	52.356	8.2	8	3	3	3	0	1	1	2	1	3	2	2	2	3	1	3	2	2	2	3	1	3	2	2	2	3	1	3	1495.3	1102.3	1136.3	3177	859.3	1939.1	22758	19566	21615	27609	0	20774	1.01307	0.870978	0.962189	1.22901
O95365	Zinc finger and BTB domain-containing protein 7A OS=Homo sapiens OX=9606 GN=ZBTB7A PE=1 SV=1	ZBTB7A	61.438	7.9	16	3	3	3	2	3	3	3	3	2	2	3	3	2	3	2	2	3	3	2	3	2	2	3	3	2	3	2	1811.9	3702.1	1562.9	1122.6	3683.3	2904.5	17545	37382	19284	12161	36357	38746	0.651928	1.38902	0.716544	0.451872	1.35093
O95372	Acyl-protein thioesterase 2 OS=Homo sapiens OX=9606 GN=LYPLA2 PE=1 SV=1	LYPLA2	24.737	40.7	52	7	7	7	9	8	8	10	9	8	7	7	6	7	6	7	7	7	6	7	6	7	7	7	6	7	6	7	140980	139380	127800	164850	142960	120270	554340	588600	524080	667830	558630	514750	0.975885	1.0362	0.922614	1.17568	0.983437
O95373	Importin-7 OS=Homo sapiens OX=9606 GN=IPO7 PE=1 SV=1	IPO7	119.52	33.9	177	29	28	29	29	29	30	30	28	31	27	27	28	28	27	27	26	26	27	27	26	26	27	27	28	28	27	27	248500	253750	252130	241700	235200	233030	986090	989440	1001700	964970	958950	977560	1.00643	1.00985	1.02237	0.984879	0.978735
O95376	E3 ubiquitin-protein ligase ARIH2 OS=Homo sapiens OX=9606 GN=ARIH2 PE=1 SV=1	ARIH2	57.818	34.1	62	12	12	12	9	12	11	9	12	9	11	12	11	10	12	11	11	12	11	10	12	11	11	12	11	10	12	11	21022	23696	22517	21373	22621	21300	115860	123110	122280	122480	116860	121180	0.963132	1.0234	1.0165	1.01816	0.971445
O95379	Tumor necrosis factor alpha-induced protein 8 OS=Homo sapiens OX=9606 GN=TNFAIP8 PE=1 SV=1	TNFAIP8	23.003	14.6	9	2	2	2	2	2	1	1	2	1	2	2	1	1	2	2	2	2	1	1	2	2	2	2	1	1	2	2	5257.9	7360.9	4303.2	4668.8	7538.9	6276.8	41780	61996	0	0	64477	36995	0.814234	1.20822			1.25657
O95382	Mitogen-activated protein kinase kinase kinase 6 OS=Homo sapiens OX=9606 GN=MAP3K6 PE=1 SV=3	MAP3K6	142.59	2.8	10	2	2	2	1	2	2	1	2	2	1	2	2	2	2	2	1	2	2	2	2	2	1	2	2	2	2	2	115.08	513.41	421.46	457.65	427.92	353.79	0	13974	11813	13165	11671	10708		1.13923	0.963053	1.07327	0.951476
O95391	Pre-mRNA-splicing factor SLU7 OS=Homo sapiens OX=9606 GN=SLU7 PE=1 SV=2	SLU7	68.386	2.9	1	1	1	1	0	0	1	0	0	0	0	1	1	0	1	0	0	1	1	0	1	0	0	1	1	0	1	0		531.41	415.7		619.67		0	0	0	0	0	0
O95394	Phosphoacetylglucosamine mutase OS=Homo sapiens OX=9606 GN=PGM3 PE=1 SV=1	PGM3	59.851	33.4	73	12	12	12	13	11	12	12	13	12	11	11	12	12	12	12	11	11	12	12	12	12	11	11	12	12	12	12	33739	34884	32245	31158	36893	34926	250520	243450	235500	230820	245730	263980	1.02253	0.993673	0.961224	0.942122	1.00298
O95396	Adenylyltransferase and sulfurtransferase MOCS3 OS=Homo sapiens OX=9606 GN=MOCS3 PE=1 SV=1	MOCS3	49.669	23.5	34	7	7	7	6	7	6	6	6	3	7	7	7	6	7	6	7	7	7	6	7	6	7	7	7	6	7	6	9116.1	8626.4	7857.4	8099.6	8361.5	6701.6	72995	68696	68793	76813	68740	67461	1.03417	0.973266	0.97464	1.08827	0.973889
O95399	Urotensin-2 OS=Homo sapiens OX=9606 GN=UTS2 PE=1 SV=1	UTS2	14.295	6.5	6	1	1	1	1	1	1	1	1	1	1	1	1	1	1	1	1	1	1	1	1	1	1	1	1	1	1	1	218810	174990	193650	224960	180220	208690	0	0	0	0	0	0
O95400	CD2 antigen cytoplasmic tail-binding protein 2 OS=Homo sapiens OX=9606 GN=CD2BP2 PE=1 SV=1	CD2BP2	37.646	10.6	6	3	3	3	1	1	0	0	1	3	3	2	2	2	3	3	3	2	2	2	3	3	3	2	2	2	3	3	19771	6945.2	8318.1	7255.8	22275	23089	134200	59876	106090	99162	142470	143780	1.17448	0.524019	0.928472	0.86784	1.24686
O95407	Tumor necrosis factor receptor superfamily member 6B OS=Homo sapiens OX=9606 GN=TNFRSF6B PE=1 SV=1	TNFRSF6B	32.679	5	2	1	1	1	0	0	1	0	0	1	0	0	1	1	1	1	0	0	1	1	1	1	0	0	1	1	1	1			1904.1	391.2	1680.1	1720.2	0	0	0	0	0	0
O95415	Brain protein I3 OS=Homo sapiens OX=9606 GN=BRI3 PE=1 SV=1	BRI3	13.645	12.8	5	1	1	1	0	1	1	1	1	1	1	1	1	1	1	1	1	1	1	1	1	1	1	1	1	1	1	1	43212	50970	53448	35107	49126	46070	0	0	0	0	0	0
O95425	Supervillin OS=Homo sapiens OX=9606 GN=SVIL PE=1 SV=2	SVIL	247.74	11.2	64	17	17	17	9	8	10	14	11	12	13	12	14	15	13	15	13	12	14	15	13	15	13	12	14	15	13	15	3379.4	3250.1	2966.3	4413	3405.2	3497.9	59298	55681	50985	64609	58379	59059	1.02235	0.959987	0.879024	1.11391	1.0065
O95429	BAG family molecular chaperone regulator 4 OS=Homo sapiens OX=9606 GN=BAG4 PE=1 SV=1	BAG4	49.593	6.8	7	2	2	2	1	1	2	1	1	1	1	1	2	1	1	1	1	1	2	1	1	1	1	1	2	1	1	1	2329	2462.9	4369.6	2476.6	2867.3	2215.9	0	0	0	0	0	0
O95433	Activator of 90 kDa heat shock protein ATPase homolog 1 OS=Homo sapiens OX=9606 GN=AHSA1 PE=1 SV=1	AHSA1	38.274	61.5	113	16	16	16	18	19	21	18	19	18	16	16	16	15	16	16	16	16	16	15	16	16	16	16	16	15	16	16	312630	352570	341410	300710	353050	322920	1185100	1268600	1323100	1110800	1256800	1250000	0.96162	1.02937	1.0736	0.901331	1.0198
O95453	Poly(A)-specific ribonuclease PARN OS=Homo sapiens OX=9606 GN=PARN PE=1 SV=1	PARN	73.45	15.8	29	9	9	9	4	3	5	5	7	5	6	8	8	8	9	7	6	8	8	8	9	7	6	8	8	8	9	7	7826.1	18811	22233	22503	22918	11756	211160	209220	245720	235890	220000	238440	0.931294	0.922738	1.08372	1.04036	0.970281
O95456	Proteasome assembly chaperone 1 OS=Homo sapiens OX=9606 GN=PSMG1 PE=1 SV=1	PSMG1	32.854	43.1	30	8	8	8	4	5	5	4	7	5	5	6	5	5	7	6	5	6	5	5	7	6	5	6	5	5	7	6	16570	29791	18291	23811	24365	26109	134600	136630	148240	121700	140660	134540	0.989257	1.00418	1.08951	0.894447	1.0338
O95470	Sphingosine-1-phosphate lyase 1 OS=Homo sapiens OX=9606 GN=SGPL1 PE=1 SV=3	SGPL1	63.523	26.9	43	10	10	10	8	8	7	7	6	7	10	10	8	9	8	9	10	10	8	9	8	9	10	10	8	9	8	9	41116	37099	27947	38035	28152	28482	202130	167290	165410	213410	161010	156610	1.13784	0.941718	0.931135	1.20134	0.906367
O95471	Claudin-7 OS=Homo sapiens OX=9606 GN=CLDN7 PE=1 SV=4	CLDN7	22.418	15.6	11	2	2	2	1	2	2	2	2	2	2	2	2	2	2	2	2	2	2	2	2	2	2	2	2	2	2	2	240040	166360	180040	256470	167750	152340	614840	412740	476170	682130	374040	414040	1.24045	0.832708	0.960679	1.3762	0.75463
O95476	CTD nuclear envelope phosphatase 1 OS=Homo sapiens OX=9606 GN=CTDNEP1 PE=1 SV=2	CTDNEP1	28.377	14.3	7	2	2	2	1	1	2	1	1	1	2	1	2	2	2	1	2	1	2	2	2	1	2	1	2	2	2	1	8563.8	3699.2	7121.1	6341.8	8210.2	2943.2	45730	0	41275	39623	43901	0	1.07266		0.968164	0.929414	1.02976
O95478	Ribosome biogenesis protein NSA2 homolog OS=Homo sapiens OX=9606 GN=NSA2 PE=1 SV=1	NSA2	30.065	38.1	19	8	8	8	4	2	3	3	3	4	7	6	6	5	5	4	7	6	6	5	5	4	7	6	6	5	5	4	137980	76977	93165	85069	84489	73927	400690	355500	365600	391410	360080	370370	1.07153	0.950683	0.977693	1.04671	0.962931
O95479	GDH/6PGL endoplasmic bifunctional protein OS=Homo sapiens OX=9606 GN=H6PD PE=1 SV=2	H6PD	88.892	14.4	29	7	7	7	6	5	3	7	3	5	7	6	7	7	7	7	7	6	7	7	7	7	7	6	7	7	7	7	5204.8	3474.8	2801	6024.5	3889.6	3268.4	63987	40295	33800	79584	41757	41047	1.27774	0.804639	0.674943	1.58919	0.833834
O95486	Protein transport protein Sec24A OS=Homo sapiens OX=9606 GN=SEC24A PE=1 SV=2	SEC24A	119.75	23.1	89	18	17	17	11	19	17	13	13	16	14	18	17	16	15	14	14	17	16	15	14	14	14	17	16	15	14	14	26771	40749	28628	26117	34094	31062	121410	154840	134730	125510	159420	144170	0.867132	1.1059	0.962265	0.896415	1.13861
O95487	Protein transport protein Sec24B OS=Homo sapiens OX=9606 GN=SEC24B PE=1 SV=2	SEC24B	137.42	23.3	92	20	19	20	14	17	17	13	18	13	16	17	17	16	18	16	16	16	16	15	17	16	16	17	17	16	18	16	30491	28938	28347	31457	29067	27273	135050	122700	120850	140660	124390	124710	1.05458	0.958145	0.943698	1.09839	0.971342
O95563	Mitochondrial pyruvate carrier 2 OS=Homo sapiens OX=9606 GN=MPC2 PE=1 SV=1	MPC2	14.279	31.5	14	3	3	3	2	2	2	2	3	3	2	2	2	2	3	3	2	2	2	2	3	3	2	2	2	2	3	3	14763	10942	11092	12489	18328	17612	105580	70431	83062	89074	88169	94791	1.19275	0.79567	0.938365	1.00628	0.996059
O95568	Histidine protein methyltransferase 1 homolog OS=Homo sapiens OX=9606 GN=METTL18 PE=1 SV=1	METTL18	42.148	4.6	2	1	1	1	0	0	1	1	0	0	1	1	1	1	0	1	1	1	1	1	0	1	1	1	1	1	0	1	446.09	338.54	396.54	243.14		274.39	0	0	0	0	0	0
O95571	Persulfide dioxygenase ETHE1, mitochondrial OS=Homo sapiens OX=9606 GN=ETHE1 PE=1 SV=2	ETHE1	27.873	58.3	43	8	8	8	7	8	7	8	8	5	7	7	7	7	8	7	7	7	7	7	8	7	7	7	7	7	8	7	56357	44623	39052	61325	45800	32577	237090	196500	162650	260710	187830	143270	1.19737	0.992382	0.82143	1.31666	0.948596
O95573	Fatty acid CoA ligase Acsl3 OS=Homo sapiens OX=9606 GN=ACSL3 PE=1 SV=3	ACSL3	80.419	48.3	128	24	23	23	21	21	20	24	19	23	22	23	21	20	20	22	21	22	20	19	19	21	21	22	20	19	19	21	157810	142480	151010	162100	126710	126520	788690	684040	748910	834110	628770	687930	1.08226	0.938659	1.02768	1.14459	0.862816
O95602	DNA-directed RNA polymerase I subunit RPA1 OS=Homo sapiens OX=9606 GN=POLR1A PE=1 SV=2	POLR1A	194.81	22.5	79	24	24	24	12	19	11	10	16	11	13	20	15	14	18	13	13	20	15	14	18	13	13	20	15	14	18	13	4447.1	7253.7	5825.2	4698.5	9851.2	5498.2	72777	94595	91093	69054	100890	86581	0.847904	1.1021	1.0613	0.804528	1.17544
O95619	YEATS domain-containing protein 4 OS=Homo sapiens OX=9606 GN=YEATS4 PE=1 SV=1	YEATS4	26.499	9.3	3	2	2	2	0	1	0	1	1	0	1	2	1	1	1	1	1	2	1	1	1	1	1	2	1	1	1	1	610.92	4550.6	1918.8	1585.1	3054.8	2617	0	0	0	0	0	0
O95628	CCR4-NOT transcription complex subunit 4 OS=Homo sapiens OX=9606 GN=CNOT4 PE=1 SV=3	CNOT4	63.509	9.4	9	3	3	3	2	1	1	1	2	2	3	3	3	2	3	3	3	3	3	2	3	3	3	3	3	2	3	3	3328.6	3792.7	3916.7	2103.1	4134.8	3424.6	42229	45566	49586	42250	52466	55807	0.880064	0.949608	1.03339	0.880502	1.09341
O95630	STAM-binding protein OS=Homo sapiens OX=9606 GN=STAMBP PE=1 SV=1	STAMBP	48.076	35.1	45	9	9	9	7	7	9	8	6	8	8	7	9	8	8	8	8	7	9	8	8	8	8	7	9	8	8	8	32307	28744	30671	31980	27986	25555	158530	139440	144050	158300	131950	131320	1.10143	0.968793	1.00082	1.09983	0.916754
O95639	Cleavage and polyadenylation specificity factor subunit 4 OS=Homo sapiens OX=9606 GN=CPSF4 PE=1 SV=1	CPSF4	30.255	19	16	4	4	4	3	3	2	3	3	2	4	4	3	4	3	3	4	4	3	4	3	3	4	4	3	4	3	3	24206	24104	16826	24872	18470	15384	167360	163940	152840	175770	164420	153260	1.02718	1.00619	0.938062	1.0788	1.00913
O95671	Probable bifunctional dTTP/UTP pyrophosphatase/methyltransferase protein OS=Homo sapiens OX=9606 GN=ASMTL PE=1 SV=3	ASMTL	68.856	22.1	33	10	10	10	5	2	5	7	7	7	6	5	6	9	7	7	6	5	6	9	7	7	6	5	6	9	7	7	3980.3	3225.1	2977.6	6384.6	5207	5031.2	45024	35491	36305	59525	57655	66458	0.899107	0.708738	0.724993	1.18868	1.15134
O95674	Phosphatidate cytidylyltransferase 2 OS=Homo sapiens OX=9606 GN=CDS2 PE=1 SV=1	CDS2	51.417	20.9	38	7	5	7	8	5	5	8	7	5	7	6	5	7	5	5	5	5	4	5	4	4	7	6	5	7	5	5	78234	63263	55426	84378	60012	51716	588500	475210	472650	655240	456940	483840	1.12726	0.910254	0.90535	1.2551	0.875258
O95684	Centrosomal protein 43 OS=Homo sapiens OX=9606 GN=CEP43 PE=1 SV=1	CEP43	43.064	15	23	4	4	4	4	4	4	4	4	3	4	4	4	4	4	4	4	4	4	4	4	4	4	4	4	4	4	4	8835.7	11624	9336.9	6923.6	12624	10247	76653	101270	90650	57705	110130	98389	0.859986	1.13617	1.01702	0.647405	1.23557
O95685	Protein phosphatase 1 regulatory subunit 3D OS=Homo sapiens OX=9606 GN=PPP1R3D PE=1 SV=1	PPP1R3D	32.559	8	4	2	2	2	1	0	0	2	1	0	1	0	0	2	1	0	1	0	0	2	1	0	1	0	0	2	1	0	349.72			1321.5	332.69		0	0	0	0	0	0
O95707	Ribonuclease P protein subunit p29 OS=Homo sapiens OX=9606 GN=POP4 PE=1 SV=2	POP4	25.424	10.5	8	2	2	2	1	1	1	0	2	3	1	2	2	1	2	2	1	2	2	1	2	2	1	2	2	1	2	2	6434	7029.3	7142.6	6043.2	6882.6	6226.1	0	48629	48989	0	44930	41287		1.0581	1.06593		0.977616
O95714	E3 ubiquitin-protein ligase HERC2 OS=Homo sapiens OX=9606 GN=HERC2 PE=1 SV=2	HERC2	527.22	4.3	18	11	11	11	2	3	3	3	5	2	5	6	6	5	6	5	5	6	6	5	6	5	5	6	6	5	6	5	247.58	269.94	250.82	255.08	393.58	550.94	24497	38038	38821	29826	36833	40324	0.705494	1.09546	1.11801	0.858965	1.06076
O95716	Ras-related protein Rab-3D OS=Homo sapiens OX=9606 GN=RAB3D PE=1 SV=1	RAB3D	24.267	32.9	26	6	3	5	3	4	5	5	5	4	5	6	5	6	6	6	2	3	2	3	3	3	4	5	4	5	5	5	15022	31862	27249	26681	31137	34435	97076	113500	128290	131620	117240	126100	0.815964	0.954014	1.07833	1.10632	0.98545
O95721	Synaptosomal-associated protein 29 OS=Homo sapiens OX=9606 GN=SNAP29 PE=1 SV=1	SNAP29	28.97	36	32	8	8	8	5	5	6	4	7	5	6	7	8	7	8	8	6	7	8	7	8	8	6	7	8	7	8	8	37688	78805	79115	78179	82022	73863	404270	401440	418160	415160	407440	416100	0.984995	0.9781	1.01884	1.01153	0.992719
O95747	Serine/threonine-protein kinase OSR1 OS=Homo sapiens OX=9606 GN=OXSR1 PE=1 SV=1	OXSR1	58.022	38	49	15	13	15	7	10	9	5	8	10	13	13	13	10	12	14	11	11	11	8	10	12	13	13	13	10	12	14	64883	63942	56685	48415	64638	60270	294870	275490	258830	269460	281470	276240	1.06814	0.997935	0.937586	0.976092	1.0196
O95749	Geranylgeranyl pyrophosphate synthase OS=Homo sapiens OX=9606 GN=GGPS1 PE=1 SV=1	GGPS1	34.87	20	29	5	5	5	4	5	5	6	4	5	5	5	5	5	5	5	5	5	5	5	5	5	5	5	5	5	5	5	13066	13353	11667	14442	12289	11589	61949	63245	59001	69076	56866	60617	1.00253	1.02351	0.954827	1.11787	0.920276
O95757	Heat shock 70 kDa protein 4L OS=Homo sapiens OX=9606 GN=HSPA4L PE=1 SV=3	HSPA4L	94.511	37.5	115	23	20	20	18	20	18	22	19	18	22	21	22	22	21	22	20	18	19	19	18	19	20	18	19	19	18	19	37594	33334	37878	41915	37910	36302	239690	221990	236250	278460	233480	246100	0.987754	0.914813	0.973578	1.14752	0.962163
O95758	Polypyrimidine tract-binding protein 3 OS=Homo sapiens OX=9606 GN=PTBP3 PE=1 SV=2	PTBP3	59.689	40.6	77	13	12	12	12	13	12	13	13	14	12	13	12	13	13	13	11	12	11	12	12	12	11	12	11	12	12	12	96705	137210	123320	110780	123780	113740	408600	468560	448530	405160	419040	446640	0.944183	1.08274	1.03645	0.936234	0.968308
O95772	STARD3 N-terminal-like protein OS=Homo sapiens OX=9606 GN=STARD3NL PE=1 SV=1	STARD3NL	26.654	9.8	7	2	2	2	1	1	1	1	2	1	2	2	2	2	2	2	2	2	2	2	2	2	2	2	2	2	2	2	7076.5	8684.7	8719.2	5866.5	9338.8	9314.1	43851	48336	50537	39857	56805	52947	0.900022	0.992074	1.03725	0.818047	1.1659
O95777	U6 snRNA-associated Sm-like protein LSm8 OS=Homo sapiens OX=9606 GN=LSM8 PE=1 SV=3	LSM8	10.403	66.7	26	5	5	5	3	5	5	4	4	5	5	5	5	5	5	5	5	5	5	5	5	5	5	5	5	5	5	5	117230	119170	105500	124950	130500	107360	445630	460010	410740	466780	449590	420300	1.00781	1.04034	0.928908	1.05564	1.01677
O95782	AP-2 complex subunit alpha-1 OS=Homo sapiens OX=9606 GN=AP2A1 PE=1 SV=3	AP2A1	107.54	35.5	97	26	19	19	16	18	15	15	16	17	22	25	23	24	24	24	17	19	17	18	18	19	17	19	17	18	18	19	46978	51337	43346	49808	48156	46747	399350	393890	369770	405000	372770	408630	1.01987	1.00593	0.944331	1.0343	0.951992
O95785	Protein Wiz OS=Homo sapiens OX=9606 GN=WIZ PE=1 SV=2	WIZ	178.67	4.7	10	5	5	5	1	3	2	2	2	0	4	5	2	2	4	3	4	5	2	2	4	3	4	5	2	2	4	3	929.93	1189.4	335.13	515.41	1075.1	881.14	28944	32376	35187	31008	33805	36516	0.877818	0.981904	1.06716	0.940415	1.02524
O95786	Antiviral innate immune response receptor RIG-I OS=Homo sapiens OX=9606 GN=DDX58 PE=1 SV=2	DDX58	106.6	30.9	105	24	24	24	11	20	16	18	23	17	16	22	20	21	23	19	16	22	20	21	23	19	16	22	20	21	23	19	16038	46731	27678	29794	64619	32947	107610	262060	163670	157140	303760	202870	0.539349	1.31346	0.820326	0.787597	1.52247
O95793	Double-stranded RNA-binding protein Staufen homolog 1 OS=Homo sapiens OX=9606 GN=STAU1 PE=1 SV=2	STAU1	63.182	40	86	17	17	17	16	14	16	14	14	12	17	17	16	15	15	15	17	17	16	15	15	15	17	17	16	15	15	15	77104	99819	82419	70754	85322	76481	267450	322480	308670	268110	317670	321910	0.888396	1.07119	1.02532	0.890588	1.05521
O95801	Tetratricopeptide repeat protein 4 OS=Homo sapiens OX=9606 GN=TTC4 PE=1 SV=3	TTC4	44.678	31.8	23	9	9	9	4	5	5	1	5	3	7	8	9	5	8	7	7	8	9	5	8	7	7	8	9	5	8	7	11293	18357	18382	8465.7	17163	14549	65213	92947	95043	53154	92881	92884	0.795083	1.13322	1.15877	0.648059	1.13241
O95807	Transmembrane protein 50A OS=Homo sapiens OX=9606 GN=TMEM50A PE=1 SV=1	TMEM50A	17.4	9.6	3	1	1	1	1	1	1	0	0	0	1	1	1	0	0	0	1	1	1	0	0	0	1	1	1	0	0	0	1915.3	1474.8	727.1				0	0	0	0	0	0
O95810	Caveolae-associated protein 2 OS=Homo sapiens OX=9606 GN=CAVIN2 PE=1 SV=3	CAVIN2	47.173	12.5	12	4	4	4	2	2	1	2	3	2	3	4	2	2	4	2	3	4	2	2	4	2	3	4	2	2	4	2	1974.1	4667.9	1487.3	1867.4	3124.1	1542.2	20727	35218	20571	32848	21745	21070	0.817209	1.38855	0.811058	1.29511	0.857346
O95816	BAG family molecular chaperone regulator 2 OS=Homo sapiens OX=9606 GN=BAG2 PE=1 SV=1	BAG2	23.772	45	44	7	7	7	8	7	7	7	8	7	7	7	6	7	7	7	7	7	6	7	7	7	7	7	6	7	7	7	59682	52821	52364	49170	56043	53189	251830	211640	235900	203830	220580	237520	1.10995	0.932814	1.03974	0.898391	0.972218
O95817	BAG family molecular chaperone regulator 3 OS=Homo sapiens OX=9606 GN=BAG3 PE=1 SV=3	BAG3	61.594	59.8	152	21	21	21	21	24	25	26	29	27	18	20	20	19	21	20	18	20	20	19	21	20	18	20	20	19	21	20	110530	128010	124940	113800	131330	115590	558010	553500	582440	537360	541430	557130	1.00546	0.997336	1.04948	0.968254	0.975588
O95819	Mitogen-activated protein kinase kinase kinase kinase 4 OS=Homo sapiens OX=9606 GN=MAP4K4 PE=1 SV=2	MAP4K4	142.1	14.3	69	15	9	15	11	11	12	11	11	13	14	13	14	12	13	12	9	9	9	8	9	9	14	13	14	12	13	12	12569	10539	12373	11133	10309	11522	110300	84133	106930	106070	84518	105390	1.10791	0.845075	1.07406	1.06542	0.848942
O95822	Malonyl-CoA decarboxylase, mitochondrial OS=Homo sapiens OX=9606 GN=MLYCD PE=1 SV=3	MLYCD	55.003	17.4	27	6	6	6	4	5	5	3	5	5	5	6	5	5	5	5	5	6	5	5	5	5	5	6	5	5	5	5	8025.2	8716.7	6826.8	8422.2	7678.2	5994	65065	59509	54368	68822	59347	53484	1.08263	0.99018	0.904638	1.14514	0.987485
O95825	Quinone oxidoreductase-like protein 1 OS=Homo sapiens OX=9606 GN=CRYZL1 PE=1 SV=2	CRYZL1	38.696	16	17	3	3	3	3	3	3	4	1	3	3	2	3	3	3	3	3	2	3	3	3	3	3	2	3	3	3	3	4147.5	2222.5	3199	5338.2	3499.3	2557	26899	19127	18797	31955	20578	19116	1.18262	0.84092	0.826411	1.4049	0.904713
O95831	Apoptosis-inducing factor 1, mitochondrial OS=Homo sapiens OX=9606 GN=AIFM1 PE=1 SV=1	AIFM1	66.9	35.6	96	17	17	17	15	15	15	19	17	15	16	15	17	16	16	17	16	15	17	16	16	17	16	15	17	16	16	17	189820	137220	160250	194940	164770	141200	949800	765520	780000	959730	751560	777920	1.1433	0.921475	0.938905	1.15525	0.904671
O95833	Chloride intracellular channel protein 3 OS=Homo sapiens OX=9606 GN=CLIC3 PE=1 SV=2	CLIC3	26.648	38.1	31	6	6	6	4	4	5	5	7	6	6	5	6	6	6	6	6	5	6	6	6	6	6	5	6	6	6	6	25707	13465	19471	19702	25126	29289	82559	59210	67686	69743	72666	94003	1.11099	0.796785	0.910846	0.938527	0.977861
O95834	Echinoderm microtubule-associated protein-like 2 OS=Homo sapiens OX=9606 GN=EML2 PE=1 SV=1	EML2	70.678	6.5	10	3	3	3	2	2	0	2	1	3	2	3	1	2	2	3	2	3	1	2	2	3	2	3	1	2	2	3	1382.8	3643.8	2524.6	2231.3	3115.8	2492.4	56974	36157	0	98976	61060	29565	1.00756	0.639422		1.75035	1.07982
O95848	Uridine diphosphate glucose pyrophosphatase NUDT14 OS=Homo sapiens OX=9606 GN=NUDT14 PE=1 SV=2	NUDT14	24.118	21.6	7	2	2	2	1	2	1	1	1	1	1	2	1	1	1	1	1	2	1	1	1	1	1	2	1	1	1	1	3482.6	5163.4	3510.6	3317.8	4165.2	3684.5	0	0	0	0	0	0
O95857	Tetraspanin-13 OS=Homo sapiens OX=9606 GN=TSPAN13 PE=2 SV=1	TSPAN13	22.147	14.2	11	2	2	2	2	2	3	1	1	2	2	2	2	2	2	2	2	2	2	2	2	2	2	2	2	2	2	2	50257	58880	54772	51007	54191	55218	222840	234580	225150	235340	234710	245560	0.956272	1.00665	0.966185	1.00991	1.00721
O95858	Tetraspanin-15 OS=Homo sapiens OX=9606 GN=TSPAN15 PE=1 SV=1	TSPAN15	33.165	14.3	18	4	4	4	3	3	3	4	2	3	4	4	4	4	4	4	4	4	4	4	4	4	4	4	4	4	4	4	23800	22597	20044	23840	19710	17811	159700	152220	147690	170520	136290	138180	1.05925	1.00964	0.979593	1.13102	0.90398
O95861	3'(2'),5'-bisphosphate nucleotidase 1 OS=Homo sapiens OX=9606 GN=BPNT1 PE=1 SV=1	BPNT1	33.392	55.2	78	14	14	14	14	14	14	9	12	15	13	13	13	12	13	14	13	13	13	12	13	14	13	13	13	12	13	14	132950	139560	132840	109470	139230	130360	596880	602420	596360	675460	590270	590990	0.980533	0.989634	0.979679	1.10962	0.969675
O95864	Acyl-CoA 6-desaturase OS=Homo sapiens OX=9606 GN=FADS2 PE=1 SV=1	FADS2	52.259	10.1	10	4	4	4	0	3	3	0	2	2	1	2	3	1	3	2	1	2	3	1	3	2	1	2	3	1	3	2	555.28	5985.6	11902	222.79	13016	2085.2	0	102200	121640	0	93520	89393		1.00503	1.1962		0.919674
O95865	N(G),N(G)-dimethylarginine dimethylaminohydrolase 2 OS=Homo sapiens OX=9606 GN=DDAH2 PE=1 SV=1	DDAH2	29.644	22.5	16	4	4	4	3	2	3	4	2	2	4	2	3	4	4	3	4	2	3	4	4	3	4	2	3	4	4	3	145020	126950	137490	144650	139180	139040	2374900	1935700	1679200	2586600	1935800	2074900	1.13206	0.922707	0.800439	1.23298	0.922754
O95870	Phosphatidylserine lipase ABHD16A OS=Homo sapiens OX=9606 GN=ABHD16A PE=1 SV=3	ABHD16A	63.243	10.4	9	4	4	4	3	1	1	2	1	1	4	3	2	3	2	2	4	3	2	3	2	2	4	3	2	3	2	2	1587.3	1133.5	1023.6	1335.1	1447	1126.1	23429	19145	20577	22672	23916	21851	1.06827	0.872939	0.938232	1.03376	1.09048
O95881	Thioredoxin domain-containing protein 12 OS=Homo sapiens OX=9606 GN=TXNDC12 PE=1 SV=1	TXNDC12	19.206	22.1	21	3	3	3	3	4	4	4	3	3	3	3	3	3	3	3	3	3	3	3	3	3	3	3	3	3	3	3	67886	71631	68897	64678	69879	69361	378730	378060	396620	362400	375300	417280	0.9844	0.982659	1.0309	0.941955	0.975485
O95900	Mitochondrial mRNA pseudouridine synthase TRUB2 OS=Homo sapiens OX=9606 GN=TRUB2 PE=1 SV=1	TRUB2	36.694	5.4	1	1	1	1	0	0	1	0	0	0	0	0	1	0	0	0	0	0	1	0	0	0	0	0	1	0	0	0			287.46				0	0	0	0	0	0
O95905	Protein ecdysoneless homolog OS=Homo sapiens OX=9606 GN=ECD PE=1 SV=1	ECD	72.757	18.9	24	7	7	7	2	5	4	1	7	5	3	6	5	3	7	6	3	6	5	3	7	6	3	6	5	3	7	6	5098.6	13459	6491.4	4333.8	14885	9206.7	28391	165760	135440	23928	140870	141630	0.267832	1.56373	1.2777	0.225729	1.32892
O95983	Methyl-CpG-binding domain protein 3 OS=Homo sapiens OX=9606 GN=MBD3 PE=1 SV=1	MBD3	32.844	28.9	40	7	7	7	8	7	6	5	7	7	7	7	7	7	7	7	7	7	7	7	7	7	7	7	7	7	7	7	30764	39824	33404	29991	40364	34823	96883	113430	103420	93918	115200	112160	0.915414	1.07176	0.97718	0.887399	1.08848
O95989	Diphosphoinositol polyphosphate phosphohydrolase 1 OS=Homo sapiens OX=9606 GN=NUDT3 PE=1 SV=1	NUDT3	19.471	23.8	3	3	3	3	0	0	2	0	1	0	1	0	2	0	1	1	1	0	2	0	1	1	1	0	2	0	1	1	1110.9		7153.2		5064.9	18251	0	0	0	0	0	0
O95994	Anterior gradient protein 2 homolog OS=Homo sapiens OX=9606 GN=AGR2 PE=1 SV=1	AGR2	19.979	58.9	40	7	7	7	5	8	5	9	7	6	6	6	6	7	6	6	6	6	6	7	6	6	6	6	6	7	6	6	100630	144460	104690	345280	166390	115040	254020	380740	272070	706990	427260	293610	0.652815	0.978477	0.699202	1.81692	1.09803
O95999	B-cell lymphoma/leukemia 10 OS=Homo sapiens OX=9606 GN=BCL10 PE=1 SV=1	BCL10	26.251	14.6	11	3	3	3	2	2	2	1	2	2	2	3	2	2	3	2	2	3	2	2	3	2	2	3	2	2	3	2	7852.1	9435.4	8653.1	8434.9	10462	8666.3	47078	49432	52840	52135	55876	56762	0.899227	0.944191	1.00929	0.99582	1.06728
O96000	NADH dehydrogenase [ubiquinone] 1 beta subcomplex subunit 10 OS=Homo sapiens OX=9606 GN=NDUFB10 PE=1 SV=3	NDUFB10	20.776	36	29	4	4	4	4	4	5	5	6	5	4	3	3	3	4	3	4	3	3	3	4	3	4	3	3	3	4	3	83751	90233	85840	85787	91213	80887	418310	366660	377430	371590	362220	372360	1.10636	0.969756	0.998241	0.982795	0.958013
O96005	Cleft lip and palate transmembrane protein 1 OS=Homo sapiens OX=9606 GN=CLPTM1 PE=1 SV=1	CLPTM1	76.096	20.9	39	9	8	9	3	8	9	3	9	7	7	8	7	5	6	7	7	8	7	5	6	7	7	8	7	5	6	7	18781	29234	30139	18616	28707	32512	132960	219330	179240	119350	228150	231520	0.718347	1.18498	0.968385	0.644816	1.23263
O96007	Molybdopterin synthase catalytic subunit OS=Homo sapiens OX=9606 GN=MOCS2 PE=1 SV=1	MOCS2	20.944	37.2	15	4	4	4	2	3	3	2	4	1	4	4	4	4	4	3	4	4	4	4	4	3	4	4	4	4	4	3	33264	31725	31774	29936	29974	26916	218210	227220	220290	173940	200580	206570	1.05009	1.09345	1.0601	0.837048	0.965247
O96008	Mitochondrial import receptor subunit TOM40 homolog OS=Homo sapiens OX=9606 GN=TOMM40 PE=1 SV=1	TOMM40	37.893	54.3	94	10	10	10	17	16	15	16	15	15	10	10	10	10	10	10	10	10	10	10	10	10	10	10	10	10	10	10	436220	403280	412860	372470	419870	397930	960330	831900	826700	839990	789910	764280	1.14938	0.995669	0.989446	1.00535	0.945413
O96011	Peroxisomal membrane protein 11B OS=Homo sapiens OX=9606 GN=PEX11B PE=1 SV=1	PEX11B	28.431	39	32	9	9	9	5	6	3	5	7	6	9	8	7	9	9	9	9	8	7	9	9	9	9	8	7	9	9	9	41036	30149	31595	44427	42807	35350	132440	114150	114070	133600	121730	117750	1.083	0.933437	0.932783	1.09248	0.995421
O96013	Serine/threonine-protein kinase PAK 4 OS=Homo sapiens OX=9606 GN=PAK4 PE=1 SV=1	PAK4	64.071	13	20	5	5	5	2	3	4	3	4	4	4	5	5	5	4	5	4	5	5	5	4	5	4	5	5	5	4	5	5843.8	7019.7	7813	7836.6	6159.2	7583.7	48877	57558	64231	63934	55480	65692	0.824298	0.9707	1.08324	1.07823	0.935655
O96017	Serine/threonine-protein kinase Chk2 OS=Homo sapiens OX=9606 GN=CHEK2 PE=1 SV=1	CHEK2	60.914	5.7	10	3	3	3	0	2	2	2	2	2	2	3	3	3	3	3	2	3	3	3	3	3	2	3	3	3	3	3	1536.2	3075.6	2974.3	3445.1	3231.2	3333.8	0	31512	33113	37507	34119	36525		0.911932	0.958264	1.08542	0.987377
O96019	Actin-like protein 6A OS=Homo sapiens OX=9606 GN=ACTL6A PE=1 SV=1	ACTL6A	47.46	36.4	54	10	10	10	6	10	7	8	13	10	6	9	7	7	10	8	6	9	7	7	10	8	6	9	7	7	10	8	64685	120420	85223	95595	129250	98546	389760	409520	443200	405150	448620	434120	0.924197	0.971052	1.05091	0.96069	1.06377
O96028	Histone-lysine N-methyltransferase NSD2 OS=Homo sapiens OX=9606 GN=NSD2 PE=1 SV=1	NSD2	152.26	7.8	15	7	7	7	1	3	3	0	5	3	3	4	5	1	6	5	3	4	5	1	6	5	3	4	5	1	6	5	123.71	734.14	826.24	15.267	809.11	766.94	9738	19751	15198	0	16755	18420	0.609677	1.23657	0.951516		1.049
O96033	Molybdopterin synthase sulfur carrier subunit OS=Homo sapiens OX=9606 GN=MOCS2 PE=1 SV=1	MOCS2	9.7552	25	7	2	2	2	1	2	1	1	1	1	1	2	2	1	1	2	1	2	2	1	1	2	1	2	2	1	1	2	2698.2	8757.3	8077.1	2691.1	1648.9	6009.5	0	32638	29748	0	0	25649		1.11222	1.01373
P00167	Cytochrome b5 OS=Homo sapiens OX=9606 GN=CYB5A PE=1 SV=2	CYB5A	15.33	49.3	44	5	5	5	5	8	8	7	8	8	5	5	5	4	5	5	5	5	5	4	5	5	5	5	5	4	5	5	247850	441160	262640	490270	459810	286160	274850	463500	302200	564540	485800	351690	0.675147	1.13855	0.74233	1.38675	1.19333
P00338	L-lactate dehydrogenase A chain OS=Homo sapiens OX=9606 GN=LDHA PE=1 SV=2	LDHA	36.688	74.7	281	21	20	21	38	49	51	44	45	54	21	21	21	21	21	21	20	20	20	20	20	20	21	21	21	21	21	21	4137300	5184300	4999100	4601300	5407000	5408900	8899400	10706000	10658000	9588400	11346000	11482000	0.851892	1.02483	1.02023	0.917846	1.08609
P00352	Aldehyde dehydrogenase 1A1 OS=Homo sapiens OX=9606 GN=ALDH1A1 PE=1 SV=2	ALDH1A1	54.861	29.5	9	9	9	9	9	0	0	0	0	0	9	0	0	0	0	1	9	0	0	0	0	1	9	0	0	0	0	1	32625					122.46	0	0	0	0	0	0
P00367	Glutamate dehydrogenase 1, mitochondrial OS=Homo sapiens OX=9606 GN=GLUD1 PE=1 SV=2	GLUD1	61.397	52.2	141	24	24	24	23	26	24	26	24	18	23	24	23	23	24	23	23	24	23	23	24	23	23	24	23	23	24	23	207300	260130	206490	269300	247000	194690	905610	1011900	918480	1246600	964150	862270	0.919555	1.02748	0.932623	1.2658	0.978996
P00374	Dihydrofolate reductase OS=Homo sapiens OX=9606 GN=DHFR PE=1 SV=2	DHFR	21.452	31	19	4	4	4	2	4	3	3	3	4	3	4	4	4	4	4	3	4	4	4	4	4	3	4	4	4	4	4	13163	41631	37069	17882	43021	36524	109160	234250	222420	106820	242180	228810	0.572698	1.22897	1.16691	0.560421	1.27058
P00387	NADH-cytochrome b5 reductase 3 OS=Homo sapiens OX=9606 GN=CYB5R3 PE=1 SV=3	CYB5R3	34.234	71.1	105	15	15	15	20	17	16	16	17	19	15	15	15	15	15	15	15	15	15	15	15	15	15	15	15	15	15	15	514930	451590	615740	454900	461550	447870	1551300	1283100	1309500	1376100	1303600	1285500	1.14782	0.949378	0.968911	1.01819	0.964546
P00390	Glutathione reductase, mitochondrial OS=Homo sapiens OX=9606 GN=GSR PE=1 SV=2	GSR	56.256	45	82	12	12	12	14	12	12	17	13	14	12	11	11	11	11	11	12	11	11	11	11	11	12	11	11	11	11	11	109780	85319	80881	127300	76937	66017	350190	263210	273470	409980	235320	226600	1.19466	0.897934	0.932936	1.39864	0.802788
P00395	Cytochrome c oxidase subunit 1 OS=Homo sapiens OX=9606 GN=MT-CO1 PE=1 SV=1	MT-CO1	57.041	10.3	17	3	3	3	3	3	3	3	3	2	3	3	3	3	3	3	3	3	3	3	3	3	3	3	3	3	3	3	44103	41476	41088	41902	43332	33279	87413	83115	85951	88787	83012	78236	1.03547	0.984553	1.01815	1.05174	0.983333
P00403	Cytochrome c oxidase subunit 2 OS=Homo sapiens OX=9606 GN=MT-CO2 PE=1 SV=1	MT-CO2	25.565	40.5	38	7	7	7	8	7	5	7	6	5	7	7	6	7	5	6	7	7	6	7	5	6	7	7	6	7	5	6	423940	391270	347640	393640	353580	328230	1444800	1373900	1356100	1537200	1187100	1290900	1.05846	1.00652	0.99348	1.12615	0.86967
P00414	Cytochrome c oxidase subunit 3 OS=Homo sapiens OX=9606 GN=MT-CO3 PE=1 SV=2	MT-CO3	29.95	5.4	4	1	1	1	0	1	1	0	1	1	0	1	1	0	1	1	0	1	1	0	1	1	0	1	1	0	1	1		23420	21373		18756	4798.4	0	0	0	0	0	0
P00441	Superoxide dismutase [Cu-Zn] OS=Homo sapiens OX=9606 GN=SOD1 PE=1 SV=2	SOD1	15.936	53.9	37	5	5	5	5	7	6	6	6	7	4	5	5	5	5	5	4	5	5	5	5	5	4	5	5	5	5	5	824940	834100	807760	924640	920660	856870	2370200	2117700	2241500	2515500	2393800	2587500	0.999649	0.893155	0.945368	1.06093	1.0096
P00450	Ceruloplasmin OS=Homo sapiens OX=9606 GN=CP PE=1 SV=1	CP	122.2	4.5	6	3	3	3	0	1	0	3	1	1	0	1	0	3	3	2	0	1	0	3	3	2	0	1	0	3	3	2		347.85		1092.1	1048.4	644.9	0	0	0	26840	22717	23224				1.10633	0.936384
P00491	Purine nucleoside phosphorylase OS=Homo sapiens OX=9606 GN=PNP PE=1 SV=2	PNP	32.118	76.1	128	17	17	17	21	22	20	24	20	21	16	17	17	16	16	16	16	17	17	16	16	16	16	17	17	16	16	16	783260	850540	762090	761350	729480	692680	1953200	2000800	1992300	1911300	1766900	1851200	1.02122	1.04611	1.04166	0.999312	0.923813
P00492	Hypoxanthine-guanine phosphoribosyltransferase OS=Homo sapiens OX=9606 GN=HPRT1 PE=1 SV=2	HPRT1	24.579	63.8	82	11	11	11	13	15	14	12	14	14	10	11	11	10	11	11	10	11	11	10	11	11	10	11	11	10	11	11	356860	381170	380950	332990	419570	387950	584560	588060	634190	622050	653310	666920	0.935523	0.941124	1.01495	0.995522	1.04555
P00505	Aspartate aminotransferase, mitochondrial OS=Homo sapiens OX=9606 GN=GOT2 PE=1 SV=3	GOT2	47.517	51.6	144	20	20	20	27	21	25	23	25	23	20	19	19	19	20	19	20	19	19	19	20	19	20	19	19	19	20	19	688150	600710	597470	674460	562390	585580	2336900	1984700	2047200	2319600	1927200	2024900	1.10924	0.942067	0.971734	1.10103	0.914774
P00533	Epidermal growth factor receptor OS=Homo sapiens OX=9606 GN=EGFR PE=1 SV=2	EGFR	134.28	31.2	145	25	25	25	22	24	24	22	25	28	23	24	24	23	24	25	23	24	24	23	24	25	23	24	24	23	24	25	36284	47349	41047	29566	47714	45520	176710	206010	209360	157350	226240	228320	0.880622	1.02664	1.04333	0.784143	1.12745
P00558	Phosphoglycerate kinase 1 OS=Homo sapiens OX=9606 GN=PGK1 PE=1 SV=3	PGK1	44.614	70	306	26	26	26	42	52	57	47	54	54	25	26	26	25	26	26	25	26	26	25	26	26	25	26	26	25	26	26	3360100	3876900	3369500	3803300	4065000	4407700	7477100	8625800	8211200	9105800	9882500	10386000	0.835611	0.963985	0.917651	1.01763	1.10443
P00568	Adenylate kinase isoenzyme 1 OS=Homo sapiens OX=9606 GN=AK1 PE=1 SV=3	AK1	21.635	61.3	47	10	10	10	9	7	9	7	7	8	10	9	10	10	9	10	10	9	10	10	9	10	10	9	10	10	9	10	142870	113020	130120	129080	125490	123520	391990	316810	338310	333420	315680	293010	1.18234	0.955581	1.02043	1.00568	0.952172
P00749	Urokinase-type plasminogen activator OS=Homo sapiens OX=9606 GN=PLAU PE=1 SV=2	PLAU	48.507	39.4	68	12	12	12	11	12	13	11	9	12	9	11	11	10	10	10	9	11	11	10	10	10	9	11	11	10	10	10	17353	22705	25663	10861	14802	18297	154250	124100	149220	100550	121370	113320	1.21328	0.976128	1.17371	0.790892	0.954655
P00813	Adenosine deaminase OS=Homo sapiens OX=9606 GN=ADA PE=1 SV=3	ADA	40.764	19.8	10	5	5	5	3	2	1	1	3	0	4	4	4	4	5	4	4	4	4	4	5	4	4	4	4	4	5	4	6294	4645.4	2738.1	4549.3	5491.6	4849.9	56526	36510	31765	54338	38553	41341	1.30932	0.845684	0.735775	1.25863	0.893006
P00846	ATP synthase subunit a OS=Homo sapiens OX=9606 GN=MT-ATP6 PE=1 SV=1	MT-ATP6	24.817	4.4	3	1	1	1	1	0	1	0	1	0	1	1	1	1	1	1	1	1	1	1	1	1	1	1	1	1	1	1	292940	267850	264030	283560	283310	274600	0	0	0	0	0	0
P00918	Carbonic anhydrase 2 OS=Homo sapiens OX=9606 GN=CA2 PE=1 SV=2	CA2	29.246	26.5	18	4	4	4	4	3	3	4	2	2	4	4	4	4	4	4	4	4	4	4	4	4	4	4	4	4	4	4	8430.6	10739	8547.8	9345.9	11540	7755.7	39598	39764	31137	46461	46390	36883	0.98899	0.993136	0.77767	1.1604	1.15863
P00966	Argininosuccinate synthase OS=Homo sapiens OX=9606 GN=ASS1 PE=1 SV=2	ASS1	46.53	41.7	65	12	12	12	11	12	9	10	11	12	12	12	12	12	12	11	12	12	12	12	12	11	12	12	12	12	12	11	71480	68106	39660	105300	76619	61263	343590	317230	200450	538530	366330	335660	0.98085	0.9056	0.572227	1.53735	1.04577
P00973	2'-5'-oligoadenylate synthase 1 OS=Homo sapiens OX=9606 GN=OAS1 PE=1 SV=4	OAS1	46.028	8.8	8	3	3	3	0	2	1	0	3	2	0	3	1	0	3	2	0	3	1	0	3	2	0	3	1	0	3	2		6436.4	2283.4		9189.2	4199.3	0	96679	0	0	125080	68441		0.999438			1.29304
P01009	Alpha-1-antitrypsin OS=Homo sapiens OX=9606 GN=SERPINA1 PE=1 SV=3	SERPINA1	46.736	9.8	11	3	3	3	1	2	2	1	3	2	1	2	2	2	3	2	1	2	2	2	3	2	1	2	2	2	3	2	488.14	2217.6	2084	1154.3	3619.5	2799.5	0	34507	33163	19947	48491	42458		0.966225	0.928592	0.558533	1.35779
P01011	Alpha-1-antichymotrypsin OS=Homo sapiens OX=9606 GN=SERPINA3 PE=1 SV=2	SERPINA3	47.65	2.6	5	1	1	1	1	1	1	1	1	0	1	1	1	1	1	1	1	1	1	1	1	1	1	1	1	1	1	1	1096.8	1617.2	1090.5	1707.1	1359.8	833.1	0	0	0	0	0	0
P01024	Complement C3 OS=Homo sapiens OX=9606 GN=C3 PE=1 SV=2	C3	187.15	10.9	45	13	13	13	3	8	4	9	13	8	9	10	5	10	12	12	9	10	5	10	12	12	9	10	5	10	12	12	2282.3	2901.8	1349.1	3272.9	5700.1	5822.9	77791	83480	62914	96028	150080	166330	0.733159	0.786776	0.592947	0.905038	1.41446
P01033	Metalloproteinase inhibitor 1 OS=Homo sapiens OX=9606 GN=TIMP1 PE=1 SV=1	TIMP1	23.171	34.8	10	4	4	4	1	2	1	0	2	4	2	4	3	1	3	4	2	4	3	1	3	4	2	4	3	1	3	4	8826.8	9477.6	10431	4257.2	11162	12531	51666	48604	61105	0	66812	77381	0.845409	0.795306	0.999859		1.09324
P01034	Cystatin-C OS=Homo sapiens OX=9606 GN=CST3 PE=1 SV=1	CST3	15.799	22.6	12	2	2	2	2	2	2	2	2	2	2	2	2	2	2	2	2	2	2	2	2	2	2	2	2	2	2	2	39599	28311	24213	23871	29653	25782	182450	152750	132000	128030	159330	154170	1.20465	1.00855	0.871546	0.845334	1.052
P01112	GTPase HRas OS=Homo sapiens OX=9606 GN=HRAS PE=1 SV=1	HRAS	21.298	49.2	6	6	2	3	1	1	3	1	0	0	5	6	6	6	6	6	1	2	2	2	2	2	2	3	3	3	3	3	11217	13706	17826	13297	17804	17626	93503	71082	100430	102860	90432	98338	1.00786	0.766183	1.08252	1.10871	0.974754
P01116	GTPase KRas OS=Homo sapiens OX=9606 GN=KRAS PE=1 SV=1	KRAS	21.656	46	31	7	3	7	6	5	6	3	5	6	6	6	6	5	6	7	2	2	2	2	3	3	6	6	6	5	6	7	95795	77007	66323	51313	41300	71677	303760	237340	230190	318660	239940	241280	1.16	0.906356	0.879052	1.2169	0.916285
P01130	Low-density lipoprotein receptor OS=Homo sapiens OX=9606 GN=LDLR PE=1 SV=1	LDLR	95.375	13.5	27	8	8	8	1	5	7	2	7	5	1	6	8	4	8	6	1	6	8	4	8	6	1	6	8	4	8	6	589.6	5032.6	7117.1	2530.9	6471.9	5302.8	0	95044	118690	53023	137450	119280		0.907797	1.13365	0.50644	1.31283
P01889	HLA class I histocompatibility antigen, B alpha chain OS=Homo sapiens OX=9606 GN=HLA-B PE=1 SV=3	HLA-B	40.46	37.3	31	11	4	7	5	4	6	5	5	6	10	9	10	9	10	10	4	4	4	4	4	4	6	5	6	6	7	6	90315	146470	107820	88293	175980	143540	678060	1027500	807160	638270	1342100	1080000	0.730001	1.10621	0.86899	0.687163	1.44491
P02144	Myoglobin OS=Homo sapiens OX=9606 GN=MB PE=1 SV=2	MB	17.184	19.5	14	2	2	2	2	3	2	3	2	2	2	2	1	2	1	1	2	2	1	2	1	1	2	2	1	2	1	1	14762	11551	3725.4	23164	9054.7	8108.4	46863	36854	20079	76740	45819	45193	1.03546	0.814309	0.443656	1.69561	1.0124
P02545	Prelamin-A/C OS=Homo sapiens OX=9606 GN=LMNA PE=1 SV=1	LMNA	74.139	65.1	330	41	38	41	57	56	55	60	53	49	36	38	38	37	38	36	34	36	36	35	36	34	36	38	38	37	38	36	1331300	1604600	1441600	1540800	1516600	1383300	4464000	4867900	4566900	5279700	4699100	4636900	0.939312	1.0243	0.960964	1.11095	0.988781
P02649	Apolipoprotein E OS=Homo sapiens OX=9606 GN=APOE PE=1 SV=1	APOE	36.154	13.9	6	3	2	3	3	2	0	0	1	0	3	2	2	1	3	2	2	1	1	0	2	1	3	2	2	1	3	2	4471.5	3854.4	1714.5	1342.3	4773.3	1809.2	59988	72668	33711	0	38418	36896	1.24106	1.50339	0.697428		0.794808
P02686	Myelin basic protein OS=Homo sapiens OX=9606 GN=MBP PE=1 SV=3	MBP	33.117	14.5	7	2	2	2	2	1	1	1	1	1	2	2	2	2	2	1	2	2	2	2	2	1	2	2	2	2	2	1	5060.9	6683.7	6044.5	5711.7	6432.4	2789	39960	53402	52604	49565	52579	0	0.805288	1.07618	1.06009	0.998851	1.05959
P02751	Fibronectin OS=Homo sapiens OX=9606 GN=FN1 PE=1 SV=5	FN1	272.32	12.6	56	20	20	20	6	9	13	6	11	11	14	14	15	10	16	16	14	14	15	10	16	16	14	14	15	10	16	16	32952	31104	28895	26786	32863	23548	1742200	1757400	2062400	1271800	2749900	2872000	0.83923	0.846552	0.993473	0.612635	1.32465
P02786	Transferrin receptor protein 1 OS=Homo sapiens OX=9606 GN=TFRC PE=1 SV=2	TFRC	84.87	40.5	171	25	25	25	26	29	30	27	29	30	23	25	25	24	24	25	23	25	25	24	24	25	23	25	25	24	24	25	292660	312150	339490	211670	288420	291550	1155600	1136500	1348800	866120	1069600	1160300	1.02919	1.01218	1.20126	0.771379	0.952601
P02792	Ferritin light chain OS=Homo sapiens OX=9606 GN=FTL PE=1 SV=2	FTL	20.019	28.6	25	4	4	4	5	4	2	5	4	5	4	4	3	4	4	4	4	4	3	4	4	4	4	4	3	4	4	4	76333	25243	17549	52831	34666	33376	297720	95233	79787	209160	130060	135110	1.88615	0.603332	0.505477	1.3251	0.823973
P02794	Ferritin heavy chain OS=Homo sapiens OX=9606 GN=FTH1 PE=1 SV=2	FTH1	21.225	66.1	81	10	10	10	16	13	11	15	11	15	9	10	10	9	9	10	9	10	10	9	9	10	9	10	10	9	9	10	1378000	940610	876720	1643700	934640	840740	3021200	1787900	1888600	3581300	1814200	2198800	1.26835	0.750588	0.792863	1.50348	0.761629
P02795	Metallothionein-2 OS=Homo sapiens OX=9606 GN=MT2A PE=1 SV=1	MT2A	6.0422	65.6	33	4	2	4	4	6	5	4	6	8	2	3	2	2	3	3	1	2	1	1	2	1	2	3	2	2	3	3	2199700	5186400	4506900	1805200	5839000	4918600	3279600	8472200	7426400	2077200	10098000	8640800	0.492011	1.27101	1.11412	0.311625	1.51492
P03886	NADH-ubiquinone oxidoreductase chain 1 OS=Homo sapiens OX=9606 GN=MT-ND1 PE=1 SV=1	MT-ND1	35.66	8.8	3	2	2	2	1	1	0	1	0	0	1	2	1	2	2	1	1	2	1	2	2	1	1	2	1	2	2	1	19299	14250	11967	17385	12635	11079	0	0	0	0	0	0
P03891	NADH-ubiquinone oxidoreductase chain 2 OS=Homo sapiens OX=9606 GN=MT-ND2 PE=1 SV=2	MT-ND2	38.96	2.6	6	1	1	1	1	1	1	1	1	1	1	1	1	1	1	1	1	1	1	1	1	1	1	1	1	1	1	1	5961	4585.2	5682.3	5684.3	5376.3	4464.1	0	0	0	0	0	0
P03905	NADH-ubiquinone oxidoreductase chain 4 OS=Homo sapiens OX=9606 GN=MT-ND4 PE=1 SV=1	MT-ND4	51.58	10.9	28	4	4	4	4	4	5	5	4	6	3	4	4	3	3	4	3	4	4	3	3	4	3	4	4	3	3	4	46233	44277	39839	43022	39589	38697	117900	101910	93097	111770	96962	95187	1.14684	0.991301	0.905575	1.08721	0.94317
P03915	NADH-ubiquinone oxidoreductase chain 5 OS=Homo sapiens OX=9606 GN=MT-ND5 PE=1 SV=2	MT-ND5	67.026	13.8	40	5	5	5	7	7	7	6	6	7	5	5	5	5	5	5	5	5	5	5	5	5	5	5	5	5	5	5	49722	42210	43491	38871	41303	40092	315800	269740	285290	272930	259000	272700	1.13091	0.965968	1.02165	0.977391	0.927506
P03923	NADH-ubiquinone oxidoreductase chain 6 OS=Homo sapiens OX=9606 GN=MT-ND6 PE=1 SV=2	MT-ND6	18.622	8	3	1	1	1	0	1	1	0	0	1	0	1	1	1	1	1	0	1	1	1	1	1	0	1	1	1	1	1		18698	13351	19811	21526	19976	0	0	0	0	0	0
P03928	ATP synthase protein 8 OS=Homo sapiens OX=9606 GN=MT-ATP8 PE=1 SV=1	MT-ATP8	7.9916	48.5	13	3	3	3	2	2	3	2	2	2	2	2	2	3	2	2	2	2	2	3	2	2	2	2	2	3	2	2	246270	125960	254140	303910	198320	223740	517500	74601	459650	419840	371190	415640	1.37485	0.198194	1.22116	1.1154	0.986149
P04040	Catalase OS=Homo sapiens OX=9606 GN=CAT PE=1 SV=3	CAT	59.755	31.9	81	13	13	13	11	15	14	12	16	13	12	12	12	12	13	13	12	12	12	12	13	13	12	12	12	12	13	13	35000	50335	44093	59178	61567	57069	124540	158830	148430	198520	189100	196170	0.735769	0.938351	0.876909	1.17284	1.11718
P04049	RAF proto-oncogene serine/threonine-protein kinase OS=Homo sapiens OX=9606 GN=RAF1 PE=1 SV=1	RAF1	73.051	15.3	7	8	4	4	0	1	1	1	1	3	3	5	5	4	6	6	1	2	2	2	2	3	1	2	2	2	2	3	545.92	868.64	723.42	854.5	1070.9	1001.4	0	28225	0	27932	30435	27355		0.990812		0.980526	1.06839
P04062	Lysosomal acid glucosylceramidase OS=Homo sapiens OX=9606 GN=GBA PE=1 SV=3	GBA	59.716	31.7	58	13	13	13	9	11	10	9	10	9	12	13	12	13	13	11	12	13	12	13	13	11	12	13	12	13	13	11	79325	84927	63788	62742	80901	63490	478260	524250	485090	403850	453700	437640	1.03118	1.13034	1.04591	0.870745	0.978227
P04066	Tissue alpha-L-fucosidase OS=Homo sapiens OX=9606 GN=FUCA1 PE=1 SV=4	FUCA1	53.688	8.4	5	3	3	3	2	0	0	2	1	0	2	1	0	2	1	0	2	1	0	2	1	0	2	1	0	2	1	0	904.47	893.68		4250.8	5058.2		14871	0	0	39782	0	0	0.544197			1.4558
P04075	Fructose-bisphosphate aldolase A OS=Homo sapiens OX=9606 GN=ALDOA PE=1 SV=2	ALDOA	39.42	79.7	322	26	23	26	50	51	56	55	57	53	25	26	25	25	25	25	22	23	22	22	22	22	25	26	25	25	25	25	4464700	5329600	5293300	4680500	5475100	5256400	11265000	12565000	13049000	12037000	12965000	14120000	0.88933	0.991961	1.03017	0.950277	1.02354
P04080	Cystatin-B OS=Homo sapiens OX=9606 GN=CSTB PE=1 SV=2	CSTB	11.139	77.6	72	8	8	8	12	13	12	13	11	11	7	8	8	7	8	6	7	8	8	7	8	6	7	8	8	7	8	6	2916500	3243400	3111800	2747400	3407400	2943400	5878800	6591100	6120000	5352600	6625300	6234300	0.958445	1.07458	0.997769	0.872657	1.08015
P04083	Annexin A1 OS=Homo sapiens OX=9606 GN=ANXA1 PE=1 SV=2	ANXA1	38.714	66.8	242	23	23	23	36	44	39	43	41	39	23	23	23	23	22	23	23	23	23	23	22	23	23	23	23	23	22	23	5290400	5119000	4811300	5918800	5298700	4757800	13994000	13016000	12975000	15755000	13363000	12504000	1.02888	0.956977	0.953962	1.15836	0.982489
P04150	Glucocorticoid receptor OS=Homo sapiens OX=9606 GN=NR3C1 PE=1 SV=1	NR3C1	85.658	15.1	29	7	7	7	6	6	5	3	6	3	7	7	7	7	7	6	7	7	7	7	7	6	7	7	7	7	7	6	5146.4	7031.1	6519.3	6457.5	7362.3	6620	57387	81874	81243	75903	80036	88057	0.741274	1.05758	1.04943	0.980448	1.03383
P04156	Major prion protein OS=Homo sapiens OX=9606 GN=PRNP PE=1 SV=1	PRNP	27.661	15.8	21	4	4	4	3	4	3	4	3	4	3	4	4	3	3	4	3	4	4	3	3	4	3	4	4	3	3	4	60983	74243	70137	46499	71657	71600	242640	261480	256490	214560	283180	282020	0.945124	1.01851	0.999072	0.835747	1.10303
P04179	Superoxide dismutase [Mn], mitochondrial OS=Homo sapiens OX=9606 GN=SOD2 PE=1 SV=3	SOD2	24.75	48.2	63	7	7	7	11	10	10	11	11	10	7	7	7	7	7	7	7	7	7	7	7	7	7	7	7	7	7	7	1074700	870780	770820	971350	1007100	996020	4286700	3310500	3075800	4114700	3794200	3948000	1.1416	0.881628	0.819125	1.0958	1.01044
P04181	Ornithine aminotransferase, mitochondrial OS=Homo sapiens OX=9606 GN=OAT PE=1 SV=1	OAT	48.534	50.6	124	16	16	16	19	21	21	21	21	21	16	16	16	16	16	16	16	16	16	16	16	16	16	16	16	16	16	16	377660	516500	468360	489230	465630	423970	1394700	1842600	1760900	1844700	1697300	1656400	0.820685	1.08424	1.03617	1.08548	0.998745
P04183	Thymidine kinase, cytosolic OS=Homo sapiens OX=9606 GN=TK1 PE=1 SV=2	TK1	25.468	45.7	34	8	8	8	2	9	10	0	5	8	4	8	7	3	8	7	4	8	7	3	8	7	4	8	7	3	8	7	10514	78931	60523	3394.5	74867	73229	28071	186780	157520	15509	183470	194240	0.219995	1.46381	1.2345	0.121545	1.43787
P04233	HLA class II histocompatibility antigen gamma chain OS=Homo sapiens OX=9606 GN=CD74 PE=1 SV=3	CD74	33.515	14.9	12	3	3	3	3	2	2	1	3	1	3	3	2	1	3	1	3	3	2	1	3	1	3	3	2	1	3	1	5692.8	8514.6	3812.2	4334	12846	3825.9	48757	77380	28464	0	122480	0	0.703866	1.11707	0.410912		1.76815
P04259	Keratin, type II cytoskeletal 6B OS=Homo sapiens OX=9606 GN=KRT6B PE=1 SV=5	KRT6B	60.066	28.2	1	16	0	1	0	0	0	0	0	1	11	14	12	14	14	14	0	0	0	0	0	0	0	0	0	0	0	1						3732.7	0	0	0	0	0	0
P04406	Glyceraldehyde-3-phosphate dehydrogenase OS=Homo sapiens OX=9606 GN=GAPDH PE=1 SV=3	GAPDH	36.053	61.5	350	14	14	14	62	62	54	57	63	52	14	14	14	14	14	14	14	14	14	14	14	14	14	14	14	14	14	14	11646000	13078000	11259000	15925000	10121000	11002000	36638000	35141000	38729000	37968000	34190000	39028000	0.991583	0.951068	1.04818	1.02758	0.92533
P04424	Argininosuccinate lyase OS=Homo sapiens OX=9606 GN=ASL PE=1 SV=4	ASL	51.657	44.2	70	18	18	18	11	10	12	15	12	10	17	16	15	18	15	15	17	16	15	18	15	15	17	16	15	18	15	15	173530	177150	112600	173530	130490	114440	755360	622520	606490	685630	596910	564570	1.18287	0.97485	0.949748	1.07368	0.934746
P04439	HLA class I histocompatibility antigen, A alpha chain OS=Homo sapiens OX=9606 GN=HLA-A PE=1 SV=2	HLA-A	40.84	40.3	95	12	5	12	16	16	17	14	16	16	12	12	12	10	11	12	5	5	5	4	5	5	12	12	12	10	11	12	299900	387050	319120	176970	409270	370620	1319100	1610200	1458700	1079700	1844500	1604500	0.887615	1.0835	0.981551	0.726524	1.24115
P04626	Receptor tyrosine-protein kinase erbB-2 OS=Homo sapiens OX=9606 GN=ERBB2 PE=1 SV=1	ERBB2	137.91	2.4	3	1	1	1	0	1	0	0	1	1	0	1	0	1	1	1	0	1	0	1	1	1	0	1	0	1	1	1		469.97		506.09	546.85	378.47	0	0	0	0	0	0
P04632	Calpain small subunit 1 OS=Homo sapiens OX=9606 GN=CAPNS1 PE=1 SV=1	CAPNS1	28.315	50	49	9	8	9	8	9	8	7	9	8	9	9	9	8	7	8	8	8	8	8	7	7	9	9	9	8	7	8	423670	373720	351960	404340	371130	329060	1291200	1103800	1165100	1322000	1093700	1089100	1.09658	0.937423	0.989483	1.12273	0.928845
P04637	Cellular tumor antigen p53 OS=Homo sapiens OX=9606 GN=TP53 PE=1 SV=4	TP53	43.653	25.4	38	8	8	8	6	6	6	6	8	6	7	7	8	8	8	8	7	7	8	8	8	8	7	7	8	8	8	8	46697	50826	58703	47849	62315	60358	206730	238360	263310	208160	262230	270700	0.855735	0.986664	1.08994	0.861655	1.08547
P04732	Metallothionein-1E OS=Homo sapiens OX=9606 GN=MT1E PE=1 SV=1	MT1E	6.0142	52.5	10	2	1	1	1	2	2	1	2	2	2	2	2	2	2	2	1	1	1	1	1	1	1	1	1	1	1	1	215720	311970	292030	157260	393880	330490	0	799640	888150	0	1046800	1073400
P04733	Metallothionein-1F OS=Homo sapiens OX=9606 GN=MT1F PE=1 SV=1	MT1F	6.0863	19.7	3	1	1	1	0	2	0	0	0	1	1	1	1	1	1	1	1	1	1	1	1	1	1	1	1	1	1	1	18882	89098	80816	23032	130400	58783	0	0	0	0	0	0
P04792	Heat shock protein beta-1 OS=Homo sapiens OX=9606 GN=HSPB1 PE=1 SV=2	HSPB1	22.782	80	183	14	14	14	24	35	26	30	33	35	13	14	14	14	14	14	13	14	14	14	14	14	13	14	14	14	14	14	7201500	8957600	8601300	8146600	9633600	8993800	18914000	22821000	23508000	21369000	24620000	24421000	0.836576	1.00938	1.03977	0.945162	1.08895
P04818	Thymidylate synthase OS=Homo sapiens OX=9606 GN=TYMS PE=1 SV=3	TYMS	35.716	18.2	14	4	4	4	0	4	2	0	4	4	1	4	3	1	4	4	1	4	3	1	4	4	1	4	3	1	4	4	1105.1	12710	10165	1360.7	14635	15764	0	64245	57606	0	77277	82969		0.910963	0.816825		1.09575
P04843	Dolichyl-diphosphooligosaccharide--protein glycosyltransferase subunit 1 OS=Homo sapiens OX=9606 GN=RPN1 PE=1 SV=1	RPN1	68.569	56.7	187	27	27	27	31	32	33	28	31	32	25	27	27	25	27	27	25	27	27	25	27	27	25	27	27	25	27	27	455050	443320	414000	430960	410350	427570	1552300	1441500	1441700	1540500	1458600	1456800	1.04751	0.972738	0.972873	1.03954	0.984277
P04844	Dolichyl-diphosphooligosaccharide--protein glycosyltransferase subunit 2 OS=Homo sapiens OX=9606 GN=RPN2 PE=1 SV=3	RPN2	69.283	51.8	128	21	21	21	21	24	22	19	22	20	19	21	21	20	21	19	19	21	21	20	21	19	19	21	21	20	21	19	494770	495010	470020	506960	487460	466520	1711700	1606300	1622100	1678300	1579300	1640400	1.04392	0.97964	0.989276	1.02355	0.963174
P04899	Guanine nucleotide-binding protein G(i) subunit alpha-2 OS=Homo sapiens OX=9606 GN=GNAI2 PE=1 SV=3	GNAI2	40.45	58.9	100	15	9	15	17	16	16	19	16	16	14	15	14	15	14	14	9	9	9	9	9	9	14	15	14	15	14	14	537800	517510	485170	618740	450500	471150	1222400	1067200	1108600	1359300	1032700	1107600	1.0633	0.928296	0.964307	1.18238	0.898286
Q99878	Histone H2A type 1-J OS=Homo sapiens OX=9606 GN=H2AC14 PE=1 SV=3	H2AC14	13.936	27.3	70	3	1	3	12	12	12	10	12	12	3	3	3	3	3	3	1	1	1	1	1	1	3	3	3	3	3	3	9541700	9121600	9476300	10641000	9635500	9714200	20743000	18758000	20859000	23280000	19740000	21842000
P04920	Anion exchange protein 2 OS=Homo sapiens OX=9606 GN=SLC4A2 PE=1 SV=4	SLC4A2	137.01	16.7	52	15	14	15	7	13	11	5	11	5	13	15	12	7	13	9	12	14	11	6	12	8	13	15	12	7	13	9	12336	17996	12543	6452.9	12379	8395.7	97356	119890	102240	57494	90544	83525	1.06004	1.3054	1.11322	0.626013	0.985872
P05023	Sodium/potassium-transporting ATPase subunit alpha-1 OS=Homo sapiens OX=9606 GN=ATP1A1 PE=1 SV=1	ATP1A1	112.89	43	192	37	27	37	32	31	31	33	34	31	35	35	33	33	35	35	25	25	25	25	25	26	35	35	33	33	35	35	221630	240860	231000	231800	233790	243170	791260	856640	884590	884410	855070	954540	0.908361	0.983417	1.0155	1.0153	0.981615
P05026	Sodium/potassium-transporting ATPase subunit beta-1 OS=Homo sapiens OX=9606 GN=ATP1B1 PE=1 SV=1	ATP1B1	35.061	14.9	17	4	4	4	3	3	3	3	3	2	3	4	4	3	4	3	3	4	4	3	4	3	3	4	4	3	4	3	23846	31786	26868	28419	29367	27181	181450	214620	194530	218660	197710	226400	0.882703	1.04407	0.946334	1.06372	0.961804
P05067	Amyloid-beta precursor protein OS=Homo sapiens OX=9606 GN=APP PE=1 SV=3	APP	86.942	19.7	58	11	11	11	8	10	8	11	11	10	10	11	11	11	11	10	10	11	11	11	11	10	10	11	11	11	11	10	10703	15121	12306	13725	14384	12041	84281	101570	88746	98598	98994	98264	0.886464	1.06831	0.933427	1.03705	1.04122
P05091	Aldehyde dehydrogenase, mitochondrial OS=Homo sapiens OX=9606 GN=ALDH2 PE=1 SV=2	ALDH2	56.381	14.5	22	5	5	5	3	2	3	5	4	5	4	4	5	5	5	5	4	4	5	5	5	5	4	4	5	5	5	5	10953	8039.6	9006.5	11939	8416.1	11087	103460	62442	72987	90102	60334	92810	1.28752	0.777069	0.908297	1.12129	0.750835
P05106	Integrin beta-3 OS=Homo sapiens OX=9606 GN=ITGB3 PE=1 SV=2	ITGB3	87.057	4.7	4	3	3	3	3	0	0	0	0	1	3	0	0	0	0	3	3	0	0	0	0	3	3	0	0	0	0	3	1274					728.77	19482	0	0	0	0	11437	1.2602
P05120	Plasminogen activator inhibitor 2 OS=Homo sapiens OX=9606 GN=SERPINB2 PE=1 SV=2	SERPINB2	46.596	20	20	6	6	6	3	1	3	4	4	5	5	3	4	5	5	6	5	3	4	5	5	6	5	3	4	5	5	6	27086	10201	12433	16406	26448	32050	234690	90709	111620	144410	224360	316570	1.25463	0.48492	0.596707	0.771999	1.1994
P05121	Plasminogen activator inhibitor 1 OS=Homo sapiens OX=9606 GN=SERPINE1 PE=1 SV=1	SERPINE1	45.059	7	2	2	2	2	0	0	0	0	1	1	1	1	1	0	2	1	1	1	1	0	2	1	1	1	1	0	2	1	1428.5	1770	1611.5		1815	1423.7	0	0	0	0	0	0
P05141	ADP/ATP translocase 2 OS=Homo sapiens OX=9606 GN=SLC25A5 PE=1 SV=7	SLC25A5	32.852	37.6	41	12	5	5	7	7	8	6	6	7	12	12	12	11	11	11	5	5	5	4	4	4	5	5	5	4	4	4	152290	122560	154610	139430	121970	123080	1003900	842960	1080200	933410	830710	1053600	1.0485	0.88041	1.12819	0.974878	0.867615
P05161	Ubiquitin-like protein ISG15 OS=Homo sapiens OX=9606 GN=ISG15 PE=1 SV=5	ISG15	17.887	77	50	9	9	9	7	11	7	7	11	7	7	9	8	7	9	8	7	9	8	7	9	8	7	9	8	7	9	8	339180	894430	514670	448820	1043300	590360	2287200	5214700	3194800	2960300	6021400	3808600	0.584289	1.33215	0.816145	0.75624	1.53823
P05165	Propionyl-CoA carboxylase alpha chain, mitochondrial OS=Homo sapiens OX=9606 GN=PCCA PE=1 SV=4	PCCA	80.058	9.2	11	4	4	4	2	2	1	3	1	2	2	2	1	3	2	2	2	2	1	3	2	2	2	2	1	3	2	2	977.6	2623.1	198.08	1476.2	2645.2	698.98	0	0	0	46418	0	22904				1.3392
P05166	Propionyl-CoA carboxylase beta chain, mitochondrial OS=Homo sapiens OX=9606 GN=PCCB PE=1 SV=3	PCCB	58.215	13.9	18	5	5	5	2	3	4	4	2	3	4	4	4	5	4	3	4	4	4	5	4	3	4	4	4	5	4	3	2737.5	2449.7	2139.2	4551.6	3153.2	2240.9	32438	29222	24365	49329	30665	31950	0.983124	0.885654	0.738449	1.49505	0.929388
P05198	Eukaryotic translation initiation factor 2 subunit 1 OS=Homo sapiens OX=9606 GN=EIF2S1 PE=1 SV=3	EIF2S1	36.112	57.1	125	18	18	18	19	24	21	20	20	21	18	18	18	18	18	17	18	18	18	18	18	17	18	18	18	18	18	17	494010	527840	477470	492400	488510	448440	1707100	1677600	1677600	1674700	1625900	1583500	1.02978	1.01198	1.01198	1.01023	0.980797
P05362	Intercellular adhesion molecule 1 OS=Homo sapiens OX=9606 GN=ICAM1 PE=1 SV=2	ICAM1	57.825	30.6	68	13	13	13	11	11	12	12	11	11	12	12	11	12	12	12	12	12	11	12	12	12	12	12	11	12	12	12	120920	96950	96230	128400	125680	140520	606100	460680	454690	646150	609950	662040	1.05727	0.803603	0.793154	1.12713	1.06399
P05386	60S acidic ribosomal protein P1 OS=Homo sapiens OX=9606 GN=RPLP1 PE=1 SV=1	RPLP1	11.514	66.7	18	3	2	2	3	3	3	3	3	3	3	3	3	3	3	3	2	2	2	2	2	2	2	2	2	2	2	2	3282700	3620500	3124000	2993800	3355400	2591500	5923800	6924700	5164300	5026500	6403900	4173700	1.05729	1.23593	0.921733	0.897138	1.14298
P05387	60S acidic ribosomal protein P2 OS=Homo sapiens OX=9606 GN=RPLP2 PE=1 SV=1	RPLP2	11.665	84.3	68	6	5	6	12	12	11	10	12	11	6	6	6	6	6	6	5	5	5	5	5	5	6	6	6	6	6	6	3323200	3092400	3123400	2928600	3110200	3186100	7339600	6088700	6498400	6916500	5809600	6051300	1.1378	0.943884	1.0074	1.07221	0.900618
P05388	60S acidic ribosomal protein P0 OS=Homo sapiens OX=9606 GN=RPLP0 PE=1 SV=1	RPLP0	34.273	45.4	68	10	3	10	9	11	12	11	12	13	10	10	10	10	10	10	3	3	3	3	3	3	10	10	10	10	10	10	1073700	1145700	1165200	1006300	1127600	916610	2863100	2786100	3167900	2666300	2776000	2874800	1.00259	0.975628	1.10932	0.933677	0.972091
P05423	DNA-directed RNA polymerase III subunit RPC4 OS=Homo sapiens OX=9606 GN=POLR3D PE=1 SV=2	POLR3D	44.395	7.5	7	2	2	2	1	2	2	1	0	1	2	2	2	2	2	2	2	2	2	2	2	2	2	2	2	2	2	2	1466.4	1224.7	1316.7	1389	1484.5	1393.1	20928	16442	18115	20425	20464	20830	1.07136	0.841712	0.927357	1.04561	1.04761
P05455	Lupus La protein OS=Homo sapiens OX=9606 GN=SSB PE=1 SV=2	SSB	46.836	53.7	151	24	24	24	23	23	29	27	25	24	23	23	23	23	24	22	23	23	23	23	24	22	23	23	23	23	24	22	490790	478250	430500	512100	462280	418130	1344700	1245400	1213300	1449100	1201300	1178200	1.05715	0.979088	0.953852	1.13923	0.944418
P05549	Transcription factor AP-2-alpha OS=Homo sapiens OX=9606 GN=TFAP2A PE=1 SV=1	TFAP2A	48.062	4.6	2	1	1	1	1	0	0	0	1	0	1	0	0	0	1	0	1	0	0	0	1	0	1	0	0	0	1	0	307.76				265.62		0	0	0	0	0	0
P05556	Integrin beta-1 OS=Homo sapiens OX=9606 GN=ITGB1 PE=1 SV=2	ITGB1	88.414	31	97	18	18	18	15	13	14	20	17	18	18	17	17	18	17	16	18	17	17	18	17	16	18	17	17	18	17	16	201520	154670	164420	168370	152920	178920	1019400	734670	842910	949840	824300	962420	1.14678	0.826472	0.948237	1.06853	0.927302
P05783	Keratin, type I cytoskeletal 18 OS=Homo sapiens OX=9606 GN=KRT18 PE=1 SV=2	KRT18	48.057	74.7	261	31	21	29	41	47	41	48	46	38	31	31	31	31	31	30	21	21	21	21	21	20	29	29	29	29	29	28	2127300	2054200	1933200	2067600	1873900	1621800	8345900	6965700	7211500	7505200	6644100	6480300	1.16042	0.968519	1.00269	1.04353	0.923803
P06132	Uroporphyrinogen decarboxylase OS=Homo sapiens OX=9606 GN=UROD PE=1 SV=2	UROD	40.786	39.2	42	9	9	9	5	7	8	7	9	6	7	7	8	8	8	7	7	7	8	8	8	7	7	7	8	8	8	7	68989	65444	95688	87249	64069	77828	436510	413830	421940	394200	389240	390910	1.07048	1.01486	1.03475	0.966717	0.954554
P06213	Insulin receptor OS=Homo sapiens OX=9606 GN=INSR PE=1 SV=4	INSR	156.33	1	2	1	1	1	1	0	0	0	0	1	1	0	0	0	0	1	1	0	0	0	0	1	1	0	0	0	0	1	160.55					50.868	0	0	0	0	0	0
P06280	Alpha-galactosidase A OS=Homo sapiens OX=9606 GN=GLA PE=1 SV=1	GLA	48.766	20.7	29	6	6	6	3	6	5	5	4	6	6	6	6	5	6	6	6	6	6	5	6	6	6	6	6	5	6	6	9160.8	10205	8786.9	7498	11962	11245	71825	77264	71613	93110	95537	101380	0.843794	0.907691	0.841303	1.09385	1.12236
P06454	Prothymosin alpha OS=Homo sapiens OX=9606 GN=PTMA PE=1 SV=2	PTMA	12.203	24.3	10	2	2	2	3	2	2	1	1	1	2	2	2	2	2	2	2	2	2	2	2	2	2	2	2	2	2	2	102390	126900	108830	21690	125440	88825	204110	323460	297520	44711	217670	181590	0.965013	1.52929	1.40665	0.211389	1.02912
P06493	Cyclin-dependent kinase 1 OS=Homo sapiens OX=9606 GN=CDK1 PE=1 SV=3	CDK1	34.095	74.7	90	17	15	17	11	17	18	13	15	16	12	15	13	13	13	15	11	14	13	12	13	14	12	15	13	13	13	15	129530	273190	227550	127800	266310	270570	531050	1050300	1074000	463550	975370	991970	0.626455	1.23899	1.26695	0.546828	1.1506
P06576	ATP synthase subunit beta, mitochondrial OS=Homo sapiens OX=9606 GN=ATP5F1B PE=1 SV=3	ATP5F1B	56.559	73.5	228	23	23	23	36	40	38	37	43	34	21	22	22	22	23	20	21	22	22	22	23	20	21	22	22	22	23	20	1265700	1311100	1189300	1338000	1281500	1084900	4107800	4000200	3758900	4191900	3794000	3810100	1.04158	1.0143	0.953112	1.0629	0.962012
P06703	Protein S100-A6 OS=Homo sapiens OX=9606 GN=S100A6 PE=1 SV=1	S100A6	10.18	35.6	31	3	3	3	5	6	6	4	5	5	3	3	3	3	3	3	3	3	3	3	3	3	3	3	3	3	3	3	1900300	2136100	1842700	1806000	2117800	1890000	4866800	5475700	4741600	4632600	5565700	5041100	0.962976	1.08346	0.938203	0.916636	1.10126
P06730	Eukaryotic translation initiation factor 4E OS=Homo sapiens OX=9606 GN=EIF4E PE=1 SV=2	EIF4E	25.097	28.1	38	6	6	6	6	5	6	8	7	6	6	6	6	6	6	5	6	6	6	6	6	5	6	6	6	6	6	5	127290	131460	130080	135700	135900	128480	419770	438650	489450	475030	426360	448610	0.933559	0.975547	1.08852	1.05646	0.948215
P06733	Alpha-enolase OS=Homo sapiens OX=9606 GN=ENO1 PE=1 SV=2	ENO1	47.168	67.3	264	21	18	21	46	45	42	43	45	43	20	20	20	20	21	20	17	17	17	17	18	17	20	20	20	20	21	20	4210800	4502800	4373900	4323900	4710100	4467300	19660000	21205000	21494000	21506000	21201000	22174000	0.927067	0.999921	1.01355	1.01412	0.999733
P06737	Glycogen phosphorylase, liver form OS=Homo sapiens OX=9606 GN=PYGL PE=1 SV=4	PYGL	97.147	53.2	174	39	30	31	27	29	29	30	32	27	36	37	34	37	37	36	27	28	25	28	28	27	28	29	26	29	29	28	185860	202780	164910	215230	197270	204320	1081100	1011500	955920	1209100	1113600	1067100	1.0075	0.942637	0.890841	1.12678	1.03779
P06744	Glucose-6-phosphate isomerase OS=Homo sapiens OX=9606 GN=GPI PE=1 SV=4	GPI	63.146	46.4	150	21	15	21	23	27	28	23	24	25	20	21	21	19	21	21	14	15	15	13	15	15	20	21	21	19	21	21	668850	725530	700350	750730	757120	764100	3540300	3621600	3743900	4010300	3949400	4242800	0.919228	0.940337	0.972092	1.04126	1.02545
P06746	DNA polymerase beta OS=Homo sapiens OX=9606 GN=POLB PE=1 SV=3	POLB	38.177	3.3	2	1	1	1	0	1	0	1	0	0	1	1	1	1	1	1	1	1	1	1	1	1	1	1	1	1	1	1	1203.2	971.23	810.89	1293.2	934.98	801.11	0	0	0	0	0	0
P06748	Nucleophosmin OS=Homo sapiens OX=9606 GN=NPM1 PE=1 SV=2	NPM1	32.575	47.6	136	9	9	9	27	20	20	27	18	24	9	9	9	8	8	9	9	9	9	8	8	9	9	9	9	8	8	9	3029000	2812100	2717900	2812700	2674900	2507600	8765900	7741100	7943000	8670400	7562200	7476800	1.09211	0.964435	0.989589	1.08021	0.942146
P06753	Tropomyosin alpha-3 chain OS=Homo sapiens OX=9606 GN=TPM3 PE=1 SV=2	TPM3	32.95	41.4	32	13	5	5	6	5	6	5	5	5	12	11	12	10	13	12	4	4	5	4	5	5	4	4	5	4	5	5	371480	349240	370390	345460	349660	351320	3394300	2827900	3135300	2921600	2669400	2843700	1.14465	0.953643	1.05731	0.985241	0.900192
P06756	Integrin alpha-V OS=Homo sapiens OX=9606 GN=ITGAV PE=1 SV=2	ITGAV	116.04	27.2	96	22	22	22	16	13	14	17	17	19	17	16	17	15	16	22	17	16	17	15	16	22	17	16	17	15	16	22	26777	24431	22062	25000	27633	34860	201410	186110	183290	207200	202170	227660	1.00051	0.92451	0.910501	1.02927	1.00429
P06865	Beta-hexosaminidase subunit alpha OS=Homo sapiens OX=9606 GN=HEXA PE=1 SV=2	HEXA	60.702	24.4	36	11	11	11	7	7	5	8	4	5	11	9	7	8	8	9	11	9	7	8	8	9	11	9	7	8	8	9	47059	17646	16870	24185	12288	22071	258370	124460	143560	205910	130210	129980	1.56195	0.752411	0.867878	1.24481	0.787172
Q16778	Histone H2B type 2-E OS=Homo sapiens OX=9606 GN=H2BC21 PE=1 SV=3	H2BC21	13.92	41.3	8	6	0	2	1	1	1	1	1	3	5	5	6	5	5	5	0	0	0	0	0	0	2	2	2	2	2	2	280350	304790	296570	334500	330420	303590	1724600	1958200	2134900	1875200	2013900	2784700
P07093	Glia-derived nexin OS=Homo sapiens OX=9606 GN=SERPINE2 PE=1 SV=1	SERPINE2	44.002	2	1	1	1	1	0	0	1	0	0	0	0	0	1	0	0	0	0	0	1	0	0	0	0	0	1	0	0	0			11009				0	0	0	0	0	0
P07099	Epoxide hydrolase 1 OS=Homo sapiens OX=9606 GN=EPHX1 PE=1 SV=1	EPHX1	52.948	50.8	111	15	15	15	20	20	15	19	21	16	15	15	13	14	13	11	15	15	13	14	13	11	15	15	13	14	13	11	182560	197670	140470	231410	178400	161650	788740	817360	650640	1031500	754120	801540	0.97699	1.01244	0.805929	1.27769	0.934107
P07108	Acyl-CoA-binding protein OS=Homo sapiens OX=9606 GN=DBI PE=1 SV=2	DBI	10.044	50.6	39	5	5	5	7	6	7	6	7	6	5	5	5	5	5	5	5	5	5	5	5	5	5	5	5	5	5	5	1384500	1218400	1404900	1314100	1171100	1124100	2714800	2477900	2969700	2607900	2274800	2464700	1.05023	0.958581	1.14884	1.00887	0.880011
P07148	Fatty acid-binding protein, liver OS=Homo sapiens OX=9606 GN=FABP1 PE=1 SV=1	FABP1	14.208	11	1	1	1	1	0	0	0	0	1	0	1	0	1	1	1	1	1	0	1	1	1	1	1	0	1	1	1	1	16866		20542	10820	44120	20577	0	0	0	0	0	0
P07195	L-lactate dehydrogenase B chain OS=Homo sapiens OX=9606 GN=LDHB PE=1 SV=2	LDHB	36.638	60.5	146	17	16	16	27	23	22	24	28	22	16	16	17	16	16	16	15	15	16	15	15	15	15	15	16	15	15	15	2390900	2454100	2534600	1949900	2383000	2389400	6643900	6523100	7054000	6682000	6366700	6814200	0.994499	0.976417	1.05588	1.0002	0.953006
P07199	Major centromere autoantigen B OS=Homo sapiens OX=9606 GN=CENPB PE=1 SV=2	CENPB	65.171	13.4	16	5	5	5	2	3	3	3	4	1	3	3	4	4	4	2	3	3	4	4	4	2	3	3	4	4	4	2	4373.5	5620.6	5552.5	5403.5	8259.8	3462.8	49680	45938	48309	45620	48505	55726	1.01464	0.938219	0.986643	0.931724	0.990646
P07203	Glutathione peroxidase 1 OS=Homo sapiens OX=9606 GN=GPX1 PE=1 SV=4	GPX1	22.088	40.9	22	6	6	6	4	4	2	7	3	2	4	4	4	6	4	4	4	4	4	6	4	4	4	4	4	6	4	4	18403	15023	11703	36653	15242	14156	104930	78146	61789	127420	83509	85470	1.16317	0.866261	0.684941	1.41247	0.925711
P07225	Vitamin K-dependent protein S OS=Homo sapiens OX=9606 GN=PROS1 PE=1 SV=1	PROS1	75.122	1.6	5	1	1	1	1	1	1	1	0	1	1	1	1	1	1	1	1	1	1	1	1	1	1	1	1	1	1	1	1048.9	445.17	671.01	682.07	549.16	596.44	0	0	0	0	0	0
P07237	Protein disulfide-isomerase OS=Homo sapiens OX=9606 GN=P4HB PE=1 SV=3	P4HB	57.116	68.1	219	29	29	29	35	36	38	33	43	34	25	27	27	25	29	28	25	27	27	25	29	28	25	27	27	25	29	28	786380	818980	747070	782950	885210	790000	2704400	2676400	2588100	2744800	2863500	2875400	0.986251	0.97604	0.943839	1.00099	1.04427
P07305	Histone H1.0 OS=Homo sapiens OX=9606 GN=H1-0 PE=1 SV=3	H1-0	20.863	26.3	29	5	5	5	5	5	5	4	5	5	5	5	5	5	5	5	5	5	5	5	5	5	5	5	5	5	5	5	330330	363280	338020	572530	462690	362360	465570	927610	909740	1206200	1238400	948450	0.49042	0.977122	0.958299	1.27058	1.3045
P07311	Acylphosphatase-1 OS=Homo sapiens OX=9606 GN=ACYP1 PE=1 SV=2	ACYP1	11.261	21.2	2	2	2	2	0	0	0	1	0	1	1	1	2	2	2	1	1	1	2	2	2	1	1	1	2	2	2	1	5797.5	11824	13093	15786	16040	7625.9	0	0	0	0	0	0
P07339	Cathepsin D OS=Homo sapiens OX=9606 GN=CTSD PE=1 SV=1	CTSD	44.552	47.8	122	14	14	14	20	20	19	22	22	19	14	14	14	14	14	14	14	14	14	14	14	14	14	14	14	14	14	14	1004700	1079100	976510	1184100	1128700	993920	2933100	3045900	2699300	3624800	3257400	2981600	0.949116	0.985617	0.873461	1.17294	1.05405
P07355	Annexin A2 OS=Homo sapiens OX=9606 GN=ANXA2 PE=1 SV=2	ANXA2	38.604	71.1	301	25	25	25	50	50	51	49	48	53	25	25	25	25	25	25	25	25	25	25	25	25	25	25	25	25	25	25	6709400	6855600	6985900	7319300	6707800	6577200	15934000	15552000	16563000	17816000	15343000	16060000	0.982893	0.959329	1.02169	1.09898	0.946437
P07384	Calpain-1 catalytic subunit OS=Homo sapiens OX=9606 GN=CAPN1 PE=1 SV=1	CAPN1	81.889	39.6	149	28	28	28	25	25	23	26	26	24	28	27	27	28	28	24	28	27	27	28	28	24	28	27	27	28	28	24	240880	233430	212850	245370	229950	186020	1049800	1035100	1010200	1095500	964330	943840	1.0328	1.01834	0.99384	1.07776	0.948713
P07437	Tubulin beta chain OS=Homo sapiens OX=9606 GN=TUBB PE=1 SV=2	TUBB	49.67	70	48	21	4	4	8	8	10	7	10	5	21	20	21	20	20	21	4	4	4	4	4	4	4	4	4	4	4	4	946670	972340	880450	844730	962860	989980	9467200	9502600	9304500	9079200	9273200	10663000	0.991508	0.995216	0.974468	0.950872	0.97119
P07476	Involucrin OS=Homo sapiens OX=9606 GN=IVL PE=1 SV=2	IVL	68.478	47.4	65	20	20	20	3	16	11	6	17	12	9	18	14	8	20	16	9	18	14	8	20	16	9	18	14	8	20	16	2996.5	22643	9485.1	4552.6	27975	13766	17734	84238	45612	30676	98776	54754	0.320697	1.52334	0.824835	0.554736	1.78624
P07602	Prosaposin OS=Homo sapiens OX=9606 GN=PSAP PE=1 SV=2	PSAP	58.112	38.4	96	19	19	19	18	17	13	19	15	14	18	19	17	18	17	17	18	19	17	18	17	17	18	19	17	18	17	17	89989	90332	79200	91239	80732	73109	494280	452010	464170	461080	403730	421500	1.09972	1.00567	1.03272	1.02585	0.898252
P07686	Beta-hexosaminidase subunit beta OS=Homo sapiens OX=9606 GN=HEXB PE=1 SV=3	HEXB	63.111	28.1	50	11	11	11	9	8	8	9	8	8	9	9	9	11	9	9	9	9	9	11	9	9	9	9	9	11	9	9	67610	48826	40936	85752	38203	41297	465110	262600	276940	496120	271610	301370	1.34571	0.759783	0.801273	1.43543	0.785852
P07711	Procathepsin L OS=Homo sapiens OX=9606 GN=CTSL PE=1 SV=2	CTSL	37.564	22.2	25	6	6	6	5	4	4	4	4	4	6	5	5	5	5	5	6	5	5	5	5	5	6	5	5	5	5	5	85253	56611	65325	56035	59836	65891	420250	328580	406540	321920	346470	405000	1.13135	0.884564	1.09444	0.866634	0.932725
P07738	Bisphosphoglycerate mutase OS=Homo sapiens OX=9606 GN=BPGM PE=1 SV=2	BPGM	30.005	25.1	18	4	4	4	2	3	4	3	3	3	2	4	4	3	4	4	2	4	4	3	4	4	2	4	4	3	4	4	4664.9	15300	10236	11456	19658	13167	46950	78864	55840	66145	99490	72430	0.671163	1.12738	0.798248	0.945561	1.42224
P07741	Adenine phosphoribosyltransferase OS=Homo sapiens OX=9606 GN=APRT PE=1 SV=2	APRT	19.608	77.8	58	10	10	10	10	10	10	9	9	10	8	10	9	9	7	9	8	10	9	9	7	9	8	10	9	9	7	9	370120	379000	350560	397980	361040	354990	2786600	2822000	2495600	2704300	2641900	2203600	1.06807	1.08164	0.956535	1.03653	1.01261
P07814	Bifunctional glutamate/proline--tRNA ligase OS=Homo sapiens OX=9606 GN=EPRS1 PE=1 SV=5	EPRS1	170.59	58	427	64	63	64	71	71	74	72	74	65	63	61	62	61	63	60	62	60	61	60	62	59	63	61	62	61	63	60	316040	240200	257800	308990	237590	220220	1038100	767500	879000	1059200	763090	791350	1.1756	0.869157	0.995425	1.19949	0.864162
P07858	Cathepsin B OS=Homo sapiens OX=9606 GN=CTSB PE=1 SV=3	CTSB	37.821	44	83	11	11	11	13	15	14	13	13	15	9	11	11	9	11	11	9	11	11	9	11	11	9	11	11	9	11	11	249890	214350	189550	246650	209100	227410	1082200	862230	809860	1084700	857830	965740	1.14669	0.913612	0.858121	1.14934	0.908949
P07864	L-lactate dehydrogenase C chain OS=Homo sapiens OX=9606 GN=LDHC PE=1 SV=4	LDHC	36.311	10.8	6	3	2	2	0	0	2	1	2	1	3	3	3	3	3	2	2	2	2	2	2	1	2	2	2	2	2	1	1329.5	1983.4	1637.5	1888	1868.2	1759.2	24154	25498	25499	29023	26569	0	0.923721	0.975119	0.975157	1.10993	1.01608
P07900	Heat shock protein HSP 90-alpha OS=Homo sapiens OX=9606 GN=HSP90AA1 PE=1 SV=5	HSP90AA1	84.659	56.1	493	40	26	40	78	82	89	75	84	85	39	40	40	37	40	39	25	26	26	23	26	25	39	40	40	37	40	39	4161800	4569600	4621000	4122500	4363500	4450000	13096000	13820000	14942000	13200000	13668000	14209000	0.947441	0.999819	1.08099	0.954965	0.988823
P07902	Galactose-1-phosphate uridylyltransferase OS=Homo sapiens OX=9606 GN=GALT PE=1 SV=3	GALT	43.363	16.9	24	5	5	5	3	3	3	6	5	4	5	4	4	5	4	4	5	4	4	5	4	4	5	4	4	5	4	4	11442	10223	7156.8	15576	9300.8	6434.9	51946	51821	39611	69129	45663	31485	1.07603	1.07344	0.820514	1.43196	0.945877
P07910	Heterogeneous nuclear ribonucleoproteins C1/C2 OS=Homo sapiens OX=9606 GN=HNRNPC PE=1 SV=4	HNRNPC	33.67	38.6	75	11	11	11	12	13	12	12	13	13	10	10	11	10	10	11	10	10	11	10	10	11	10	10	11	10	10	11	938550	864250	930790	950550	889860	934940	3072300	2771600	3059200	3082400	2748900	3140800	1.03125	0.930317	1.02685	1.03464	0.922697
P07919	Cytochrome b-c1 complex subunit 6, mitochondrial OS=Homo sapiens OX=9606 GN=UQCRH PE=1 SV=2	UQCRH	10.739	27.5	8	2	2	2	1	1	1	1	2	2	2	2	2	1	2	2	2	2	2	1	2	2	2	2	2	1	2	2	198950	188190	153690	161110	195930	132690	852090	803650	736100	775430	830480	699670	1.08837	1.0265	0.940218	0.990454	1.06077
P07947	Tyrosine-protein kinase Yes OS=Homo sapiens OX=9606 GN=YES1 PE=1 SV=3	YES1	60.801	16.2	22	7	3	3	4	3	4	4	2	5	7	7	7	7	7	7	3	3	3	3	3	3	3	3	3	3	3	3	8241	6661.6	6384.5	8766.3	6401.1	6838.3	84695	67420	73104	93185	71635	77309	1.08735	0.865565	0.938538	1.19635	0.919679
P07948	Tyrosine-protein kinase Lyn OS=Homo sapiens OX=9606 GN=LYN PE=1 SV=3	LYN	58.573	22.7	33	8	7	7	5	5	4	8	5	6	7	7	6	8	8	7	6	6	5	7	7	6	6	6	5	7	7	6	27310	31020	25527	41535	35737	30166	280370	280120	255570	343620	288620	268440	0.979892	0.979018	0.893216	1.20095	1.00873
P07954	Fumarate hydratase, mitochondrial OS=Homo sapiens OX=9606 GN=FH PE=1 SV=3	FH	54.636	49.8	99	14	14	14	17	13	17	18	17	17	14	14	14	14	14	14	14	14	14	14	14	14	14	14	14	14	14	14	340490	337670	317130	369810	339300	305800	1449200	1374700	1364300	1609600	1394300	1378600	1.01453	0.962372	0.955091	1.12682	0.976093
P07992	DNA excision repair protein ERCC-1 OS=Homo sapiens OX=9606 GN=ERCC1 PE=1 SV=1	ERCC1	32.562	3.7	1	1	1	1	1	0	0	0	0	0	1	0	0	0	0	0	1	0	0	0	0	0	1	0	0	0	0	0	561.4						0	0	0	0	0	0
P08047	Transcription factor Sp1 OS=Homo sapiens OX=9606 GN=SP1 PE=1 SV=3	SP1	80.692	3.3	6	2	2	2	1	1	1	1	1	1	2	2	2	2	2	1	2	2	2	2	2	1	2	2	2	2	2	1	5168.1	6803.7	6758.4	5451.4	7421.3	5056.2	0	0	0	0	0	0
P08123	Collagen alpha-2(I) chain OS=Homo sapiens OX=9606 GN=COL1A2 PE=1 SV=7	COL1A2	129.31	2	3	2	2	2	0	0	0	0	1	2	0	0	0	1	2	2	0	0	0	1	2	2	0	0	0	1	2	2				116.88	408.91	555.39	0	0	0	0	16497	25654					0.782757
P08133	Annexin A6 OS=Homo sapiens OX=9606 GN=ANXA6 PE=1 SV=3	ANXA6	75.872	29.1	56	15	15	15	9	9	5	13	10	10	13	10	8	13	12	14	13	10	8	13	12	14	13	10	8	13	12	14	13069	6408.6	5225.4	12808	9539.9	13271	93159	43598	52761	85637	65901	85024	1.31185	0.613941	0.742973	1.20593	0.928009
P08134	Rho-related GTP-binding protein RhoC OS=Homo sapiens OX=9606 GN=RHOC PE=1 SV=1	RHOC	22.006	37.3	43	7	7	7	8	6	8	6	6	9	7	6	7	6	7	6	7	6	7	6	7	6	7	6	7	6	7	6	733870	545820	562380	579710	704850	623470	2464300	2179000	2374500	2382800	2271100	2554500	1.03934	0.919009	1.00146	1.00496	0.957852
P08174	Complement decay-accelerating factor OS=Homo sapiens OX=9606 GN=CD55 PE=1 SV=4	CD55	41.4	20.2	23	5	5	5	4	4	3	3	5	4	4	4	5	4	5	4	4	4	5	4	5	4	4	4	5	4	5	4	14446	12764	11543	13474	18131	9824.7	133680	112660	106860	126840	117220	98656	1.15255	0.971324	0.921318	1.09358	1.01064
P08183	ATP-dependent translocase ABCB1 OS=Homo sapiens OX=9606 GN=ABCB1 PE=1 SV=3	ABCB1	141.48	1.3	5	1	1	1	1	1	0	1	1	1	1	1	1	1	1	1	1	1	1	1	1	1	1	1	1	1	1	1	2198.4	2627.8	2190.9	2555.9	2788.1	2320	0	0	0	0	0	0
P08195	4F2 cell-surface antigen heavy chain OS=Homo sapiens OX=9606 GN=SLC3A2 PE=1 SV=3	SLC3A2	67.993	40	118	21	21	21	22	20	18	24	16	18	19	18	17	21	17	17	19	18	17	21	17	17	19	18	17	21	17	17	453910	286770	316150	514410	264140	260960	2741300	1640900	1966300	3093500	1559300	1652800	1.2998	0.77804	0.93233	1.4668	0.739349
P08236	Beta-glucuronidase OS=Homo sapiens OX=9606 GN=GUSB PE=1 SV=2	GUSB	74.731	17.7	22	6	6	6	6	3	3	4	4	2	6	4	3	6	4	2	6	4	3	6	4	2	6	4	3	6	4	2	10121	5810.7	3447.5	12930	6615.6	3705.3	133390	68965	46463	163900	79593	60576	1.44756	0.748417	0.504222	1.77866	0.863753
P08237	ATP-dependent 6-phosphofructokinase, muscle type OS=Homo sapiens OX=9606 GN=PFKM PE=1 SV=2	PFKM	85.182	45.3	146	27	24	25	23	23	25	24	26	25	25	26	27	24	26	25	22	23	24	21	23	22	23	24	25	22	24	23	127200	127530	129680	116740	123550	118560	419190	390710	409020	422680	385800	418030	1.02851	0.958629	1.00355	1.03707	0.946582
P08238	Heat shock protein HSP 90-beta OS=Homo sapiens OX=9606 GN=HSP90AB1 PE=1 SV=4	HSP90AB1	83.263	55.8	243	37	22	25	35	40	44	43	41	40	35	36	36	36	37	36	20	21	21	22	22	21	23	24	24	25	25	24	1167700	1341400	1405400	1159400	1424400	1392400	5221000	5758100	6211000	5309900	6159100	5928400	0.905703	0.998875	1.07744	0.921125	1.06844
P08240	Signal recognition particle receptor subunit alpha OS=Homo sapiens OX=9606 GN=SRPRA PE=1 SV=2	SRPRA	69.81	28.2	71	16	16	16	13	9	12	13	12	12	15	14	14	14	14	14	15	14	14	14	14	14	15	14	14	14	14	14	42023	35644	37349	43307	37460	36742	144330	119480	130780	161230	127890	135750	1.05677	0.87482	0.957557	1.18051	0.936397
P08243	Asparagine synthetase [glutamine-hydrolyzing] OS=Homo sapiens OX=9606 GN=ASNS PE=1 SV=4	ASNS	64.369	42.1	84	20	20	20	13	14	18	12	13	14	18	17	20	16	16	16	18	17	20	16	16	16	18	17	20	16	16	16	87178	100730	134210	75281	85293	85525	311400	361870	501460	277530	300360	339790	0.892942	1.03767	1.43794	0.795819	0.861284
P08294	Extracellular superoxide dismutase [Cu-Zn] OS=Homo sapiens OX=9606 GN=SOD3 PE=1 SV=2	SOD3	25.851	8.8	7	2	2	2	1	1	1	1	2	1	2	2	1	2	2	2	2	2	1	2	2	2	2	2	1	2	2	2	7207.5	7120.8	2604.5	3814.5	6851.5	5778	32020	32492	0	24106	36257	30528	1.03022	1.04541		0.775596	1.16655
P08397	Porphobilinogen deaminase OS=Homo sapiens OX=9606 GN=HMBS PE=1 SV=2	HMBS	39.33	34.3	67	9	9	9	10	12	12	10	13	10	8	9	9	8	9	8	8	9	9	8	9	8	8	9	9	8	9	8	70818	60460	57681	74632	64466	48832	361190	309320	288320	347990	312450	257140	1.15494	0.98908	0.921931	1.11273	0.999089
P08559	Pyruvate dehydrogenase E1 component subunit alpha, somatic form, mitochondrial OS=Homo sapiens OX=9606 GN=PDHA1 PE=1 SV=3	PDHA1	43.295	45.4	75	15	14	15	13	12	15	12	14	9	13	14	15	13	15	13	13	13	14	12	14	12	13	14	15	13	15	13	112320	93010	109590	122910	127320	108560	677860	645040	630010	742970	616170	595370	1.04088	0.990485	0.967406	1.14086	0.946154
P08571	Monocyte differentiation antigen CD14 OS=Homo sapiens OX=9606 GN=CD14 PE=1 SV=2	CD14	40.076	19.2	17	4	4	4	3	3	1	4	3	3	3	4	2	4	3	3	3	4	2	4	3	3	3	4	2	4	3	3	4036.1	5207	1648.7	9221.2	6111.1	3917.5	35753	43100	20385	73884	52811	36609	0.817081	0.984985	0.465868	1.68851	1.20691
P08574	Cytochrome c1, heme protein, mitochondrial OS=Homo sapiens OX=9606 GN=CYC1 PE=1 SV=3	CYC1	35.422	23.7	28	5	5	5	4	4	6	6	5	3	4	5	5	5	5	5	4	5	5	5	5	5	4	5	5	5	5	5	88049	87970	69323	91812	81522	70055	749990	704390	591450	759830	647580	541850	1.12637	1.05788	0.888265	1.14115	0.972564
P08579	U2 small nuclear ribonucleoprotein B'' OS=Homo sapiens OX=9606 GN=SNRPB2 PE=1 SV=1	SNRPB2	25.486	20	19	4	4	4	4	3	3	3	4	2	4	2	3	4	3	2	4	2	3	4	3	2	4	2	3	4	3	2	34170	16440	36763	30648	36579	11868	143190	139830	165820	143760	162110	154580	0.944847	0.922676	1.09417	0.948608	1.06969
P08581	Hepatocyte growth factor receptor OS=Homo sapiens OX=9606 GN=MET PE=1 SV=4	MET	155.54	21.5	79	23	23	23	20	10	14	9	14	12	21	16	20	15	18	15	21	16	20	15	18	15	21	16	20	15	18	15	13139	6906.2	13630	10019	11576	9245.8	173610	109890	176550	107830	124610	144280	1.24486	0.787958	1.26594	0.773187	0.893507
P08582	Melanotransferrin OS=Homo sapiens OX=9606 GN=MELTF PE=1 SV=2	MELTF	80.214	24.8	41	12	12	12	11	5	6	7	7	5	12	9	12	11	10	10	12	9	12	11	10	10	12	9	12	11	10	10	12770	7828.6	9165	9028.5	9164.4	9622	81234	62158	57843	70262	64477	78403	1.17623	0.900021	0.837542	1.01736	0.933599
P08621	U1 small nuclear ribonucleoprotein 70 kDa OS=Homo sapiens OX=9606 GN=SNRNP70 PE=1 SV=2	SNRNP70	51.556	32.5	67	11	11	11	9	13	11	11	10	13	10	11	11	10	10	10	10	11	11	10	10	10	10	11	11	10	10	10	164700	156650	155520	177470	163330	158920	785490	734840	760400	861750	745410	794710	1.00648	0.941579	0.974331	1.10419	0.955123
P08648	Integrin alpha-5 OS=Homo sapiens OX=9606 GN=ITGA5 PE=1 SV=2	ITGA5	114.54	23.2	86	16	16	16	15	16	16	12	14	13	15	15	16	15	15	16	15	15	16	15	15	16	15	15	16	15	15	16	33559	39213	40408	33249	44099	54427	208100	212190	246020	209060	265440	314590	0.857908	0.87477	1.01424	0.861866	1.0943
P08651	Nuclear factor 1 C-type OS=Homo sapiens OX=9606 GN=NFIC PE=1 SV=2	NFIC	55.674	14.2	12	5	5	5	2	2	3	1	2	2	4	4	5	4	5	4	4	4	5	4	5	4	4	4	5	4	5	4	8068.1	8428.6	8609.5	8668.2	9052.4	8122.9	77267	74719	70777	81835	67706	79941	1.02511	0.991308	0.939009	1.08572	0.898265
P08670	Vimentin OS=Homo sapiens OX=9606 GN=VIM PE=1 SV=4	VIM	53.651	76	317	37	31	37	62	50	61	41	48	55	34	34	36	32	37	36	29	30	31	27	31	31	34	34	36	32	37	36	3039200	1905200	2516500	1900000	2152800	2707600	10778000	6888800	9089900	6887900	7112100	9380800	1.28981	0.824389	1.0878	0.824281	0.851111
P08708	40S ribosomal protein S17 OS=Homo sapiens OX=9606 GN=RPS17 PE=1 SV=2	RPS17	15.55	49.6	50	6	6	6	9	8	9	9	7	8	6	5	6	5	5	5	6	5	6	5	5	5	6	5	6	5	5	5	628500	561970	622100	526330	570000	620250	1035400	993740	922200	889840	940830	949220	1.08396	1.04034	0.965447	0.93157	0.984951
P08754	Guanine nucleotide-binding protein G(i) subunit alpha-3 OS=Homo sapiens OX=9606 GN=GNAI3 PE=1 SV=3	GNAI3	40.532	39.3	27	11	5	5	4	4	5	5	4	5	10	11	10	11	10	10	5	5	5	5	5	5	5	5	5	5	5	5	64353	54609	56829	66585	54270	57236	337440	276910	305250	342260	271090	312800	1.09692	0.900154	0.99228	1.11259	0.881235
P08758	Annexin A5 OS=Homo sapiens OX=9606 GN=ANXA5 PE=1 SV=2	ANXA5	35.936	70	129	19	19	19	17	24	20	25	23	20	17	19	19	18	19	18	17	19	19	18	19	18	17	19	19	18	19	18	971220	1011100	863490	990850	961960	870490	3152800	3057400	3024600	3205200	2828200	3027900	1.03392	1.00264	0.991884	1.05111	0.927476
P08842	Steryl-sulfatase OS=Homo sapiens OX=9606 GN=STS PE=1 SV=2	STS	65.492	12.9	19	5	5	5	2	3	3	5	3	3	4	4	4	5	3	4	4	4	4	5	3	4	4	4	4	5	3	4	3165.9	4851.7	4343.5	5877	2291.8	4523	39761	69460	58962	69958	78142	68656	0.61975	1.08266	0.919034	1.09043	1.21799
P08865	40S ribosomal protein SA OS=Homo sapiens OX=9606 GN=RPSA PE=1 SV=4	RPSA	32.854	62.4	116	15	15	15	21	18	20	20	19	18	15	15	15	14	15	14	15	15	15	14	15	14	15	15	15	14	15	14	1775600	1782900	1757700	1604600	1769200	1641000	4452100	4249100	4401400	4471100	4400500	4382100	1.01352	0.967306	1.00198	1.01784	1.00177
P08962	CD63 antigen OS=Homo sapiens OX=9606 GN=CD63 PE=1 SV=2	CD63	25.636	7.6	14	2	2	2	2	1	3	3	2	3	2	2	2	2	2	2	2	2	2	2	2	2	2	2	2	2	2	2	21891	47956	56538	20049	40274	48418	84240	200080	262390	75490	194780	208430	0.492915	1.17073	1.53533	0.441716	1.13972
P09001	39S ribosomal protein L3, mitochondrial OS=Homo sapiens OX=9606 GN=MRPL3 PE=1 SV=1	MRPL3	38.632	27.6	21	6	6	6	2	3	5	2	5	4	5	5	6	5	5	5	5	5	6	5	5	5	5	5	6	5	5	5	22890	28015	25846	22932	28822	24357	114070	122480	125240	114710	130920	124510	0.935089	1.00403	1.02666	0.940336	1.07322
P09012	U1 small nuclear ribonucleoprotein A OS=Homo sapiens OX=9606 GN=SNRPA PE=1 SV=3	SNRPA	31.279	28	35	6	5	6	8	7	4	5	5	6	5	5	4	3	4	4	5	5	4	3	4	4	5	5	4	3	4	4	120680	108220	79306	93355	86646	84774	340580	282390	306810	366660	296890	315790	1.07038	0.887498	0.964245	1.15234	0.933069
P09104	Gamma-enolase OS=Homo sapiens OX=9606 GN=ENO2 PE=1 SV=3	ENO2	47.268	59.7	80	17	14	14	12	13	14	13	14	14	16	16	16	15	17	17	13	13	13	12	14	14	13	13	13	12	14	14	207350	169840	139300	173150	194680	174760	688700	755260	636090	788190	861360	815880	0.909079	0.996938	0.839634	1.04041	1.13699
P09110	3-ketoacyl-CoA thiolase, peroxisomal OS=Homo sapiens OX=9606 GN=ACAA1 PE=1 SV=2	ACAA1	44.292	62	103	16	16	16	19	18	16	19	16	15	16	16	15	15	16	16	16	16	15	15	16	16	16	16	15	15	16	16	238190	206840	168230	242910	182330	155960	1038800	874170	850670	1057800	832730	765570	1.15002	0.967762	0.941746	1.17105	0.921886
P09132	Signal recognition particle 19 kDa protein OS=Homo sapiens OX=9606 GN=SRP19 PE=1 SV=3	SRP19	16.156	54.2	30	5	5	5	5	5	5	5	5	5	5	5	5	5	5	5	5	5	5	5	5	5	5	5	5	5	5	5	78519	78557	85490	77548	76302	73610	226270	197080	235560	223270	199200	212740	1.04907	0.913733	1.09214	1.03516	0.923562
P09211	Glutathione S-transferase P OS=Homo sapiens OX=9606 GN=GSTP1 PE=1 SV=2	GSTP1	23.356	57.6	130	11	11	11	21	28	22	17	19	23	10	11	11	11	11	11	10	11	11	11	11	11	10	11	11	11	11	11	2590800	2745800	2508000	2785100	2700800	2642000	6093800	5546600	5418200	6183700	5862600	6112200	1.03821	0.944984	0.923108	1.05353	0.998822
P09234	U1 small nuclear ribonucleoprotein C OS=Homo sapiens OX=9606 GN=SNRPC PE=1 SV=1	SNRPC	17.394	18.9	16	2	2	2	2	2	3	3	3	3	2	2	2	2	2	2	2	2	2	2	2	2	2	2	2	2	2	2	147630	218060	209630	249670	226040	205210	523350	478660	484850	579880	493890	493500	1.02815	0.940353	0.952513	1.13921	0.970273
P09382	Galectin-1 OS=Homo sapiens OX=9606 GN=LGALS1 PE=1 SV=2	LGALS1	14.716	83.7	124	9	9	9	19	18	22	22	24	19	8	8	9	9	9	8	8	8	9	9	9	8	8	8	9	9	9	8	6179400	5727100	6026500	5855300	6114300	6306400	15023000	13317000	15041000	14069000	14069000	15627000	1.03433	0.916875	1.03557	0.96865	0.96865
P09417	Dihydropteridine reductase OS=Homo sapiens OX=9606 GN=QDPR PE=1 SV=2	QDPR	25.789	42.2	42	6	6	6	8	7	8	9	5	5	5	6	5	6	5	5	5	6	5	6	5	5	5	6	5	6	5	5	74934	79662	62762	98395	57326	52948	393800	296250	323440	364500	280980	292220	1.21095	0.910983	0.994593	1.12085	0.864027
P09429	High mobility group protein B1 OS=Homo sapiens OX=9606 GN=HMGB1 PE=1 SV=3	HMGB1	24.893	39.1	55	11	9	10	9	10	9	12	7	8	10	11	11	10	10	10	9	9	9	9	8	9	10	10	10	10	9	9	462220	410100	360970	490270	355080	310330	834260	679560	662660	812940	602330	611450	1.19089	0.970061	0.945936	1.16046	0.859816
P09467	Fructose-1,6-bisphosphatase 1 OS=Homo sapiens OX=9606 GN=FBP1 PE=1 SV=5	FBP1	36.842	17.5	10	4	3	4	1	2	2	2	2	1	1	2	2	2	3	2	1	2	2	2	3	2	1	2	2	2	3	2	509.31	6317.1	2333.5	4458.9	10209	3597.3	0	61634	24188	46021	86749	45971		1.16483	0.457131	0.869755	1.63948
P09493	Tropomyosin alpha-1 chain OS=Homo sapiens OX=9606 GN=TPM1 PE=1 SV=2	TPM1	32.708	41.2	66	14	5	14	12	12	10	9	12	11	14	13	13	12	13	13	5	5	5	5	4	5	14	13	13	12	13	13	324900	314070	338490	250250	357400	369800	2796100	2370800	2603800	1784500	2764200	2851800	1.10582	0.937619	1.02977	0.705745	1.0932
P09496	Clathrin light chain A OS=Homo sapiens OX=9606 GN=CLTA PE=1 SV=1	CLTA	27.076	10.1	15	3	3	3	2	2	3	3	3	2	3	3	3	3	3	3	3	3	3	3	3	3	3	3	3	3	3	3	197620	188160	195110	198680	182350	201950	614570	565650	634690	634080	547540	675810	1.00411	0.924179	1.03698	1.03598	0.89459
P09497	Clathrin light chain B OS=Homo sapiens OX=9606 GN=CLTB PE=1 SV=1	CLTB	25.19	21.4	26	6	6	6	6	5	5	5	3	2	6	6	6	6	6	5	6	6	6	6	6	5	6	6	6	6	6	5	210780	209640	196780	197570	183400	127840	557400	510740	515760	530160	452930	454310	1.10694	1.01428	1.02425	1.05285	0.899474
P09525	Annexin A4 OS=Homo sapiens OX=9606 GN=ANXA4 PE=1 SV=4	ANXA4	35.882	51.7	71	15	15	15	10	11	12	10	14	14	13	13	13	11	14	14	13	13	13	11	14	14	13	13	13	11	14	14	143490	141020	126790	126160	146290	147450	601830	546850	528740	642630	555390	526190	1.06154	0.964567	0.932623	1.13351	0.97963
P09543	2',3'-cyclic-nucleotide 3'-phosphodiesterase OS=Homo sapiens OX=9606 GN=CNP PE=1 SV=2	CNP	47.578	27.8	44	11	11	11	6	6	8	8	6	10	10	10	11	11	10	11	10	10	11	11	10	11	10	10	11	11	10	11	53931	68959	65225	61868	59858	58679	506980	579810	554340	530780	555920	547270	0.92879	1.06221	1.01555	0.972392	1.01845
P09601	Heme oxygenase 1 OS=Homo sapiens OX=9606 GN=HMOX1 PE=1 SV=1	HMOX1	32.818	50.3	68	11	11	11	11	11	13	8	12	13	9	8	11	8	10	10	9	8	11	8	10	10	9	8	11	8	10	10	283310	262600	433930	178160	309630	393130	959230	819550	1221400	569310	900650	1299700	0.997494	0.852242	1.27012	0.59202	0.936577
P09622	Dihydrolipoyl dehydrogenase, mitochondrial OS=Homo sapiens OX=9606 GN=DLD PE=1 SV=2	DLD	54.177	41.3	102	14	14	14	17	17	18	19	14	17	14	13	14	14	14	14	14	13	14	14	14	14	14	13	14	14	14	14	423040	353170	354450	423790	341770	326790	2138500	1740400	1796600	2202400	1670400	1738100	1.13685	0.92522	0.955096	1.17083	0.888007
P09651	Heterogeneous nuclear ribonucleoprotein A1 OS=Homo sapiens OX=9606 GN=HNRNPA1 PE=1 SV=5	HNRNPA1	38.746	41.4	142	12	12	12	21	27	23	23	27	21	11	12	12	11	12	12	11	12	12	11	12	12	11	12	12	11	12	12	1404000	1789600	1705200	1470600	1769000	1578600	5753200	5908900	6166300	5882400	6022800	6068700	0.964162	0.990255	1.03339	0.985814	1.00934
P09661	U2 small nuclear ribonucleoprotein A' OS=Homo sapiens OX=9606 GN=SNRPA1 PE=1 SV=2	SNRPA1	28.415	31	49	8	8	8	8	8	9	7	9	8	8	7	8	8	8	8	8	7	8	8	8	8	8	7	8	8	8	8	191680	190400	185130	185180	197340	173780	501890	490460	535770	524580	492240	489310	0.99245	0.969848	1.05944	1.03732	0.973367
P09668	Pro-cathepsin H OS=Homo sapiens OX=9606 GN=CTSH PE=1 SV=4	CTSH	37.393	7.8	8	2	2	2	1	2	1	2	2	0	2	2	2	2	2	2	2	2	2	2	2	2	2	2	2	2	2	2	4374.6	5599.2	4694.1	5239.1	5431.4	5116.6	38319	46442	43083	46020	45469	45982	0.86657	1.05027	0.974306	1.04072	1.02826
P09758	Tumor-associated calcium signal transducer 2 OS=Homo sapiens OX=9606 GN=TACSTD2 PE=1 SV=3	TACSTD2	35.709	32.2	54	8	8	8	9	10	9	9	10	7	8	8	8	8	8	8	8	8	8	8	8	8	8	8	8	8	8	8	143180	114330	118000	129090	106320	77956	534760	483840	424490	480300	452100	359020	1.17336	1.06163	0.931406	1.05386	0.991988
P09874	Poly [ADP-ribose] polymerase 1 OS=Homo sapiens OX=9606 GN=PARP1 PE=1 SV=4	PARP1	113.08	52.5	266	44	44	44	43	44	45	46	45	43	37	40	39	40	40	38	37	40	39	40	40	38	37	40	39	40	40	38	194600	188590	190900	220580	214920	210160	857090	781350	815530	892200	845850	871420	1.01562	0.925873	0.966375	1.05723	1.0023
P09884	DNA polymerase alpha catalytic subunit OS=Homo sapiens OX=9606 GN=POLA1 PE=1 SV=2	POLA1	165.91	4.7	10	5	5	5	1	3	2	1	1	2	1	4	4	2	4	3	1	4	4	2	4	3	1	4	4	2	4	3	1506.4	1431.1	2264.4	392.19	3149.6	1140	0	52470	84685	32681	84602	95085		0.750594	1.21144	0.467509	1.21025
P09913	Interferon-induced protein with tetratricopeptide repeats 2 OS=Homo sapiens OX=9606 GN=IFIT2 PE=1 SV=1	IFIT2	54.632	21	31	8	8	8	3	8	6	4	7	3	6	8	7	7	8	6	6	8	7	7	8	6	6	8	7	7	8	6	8561.1	27744	12641	16022	28362	13537	62002	149460	91475	98937	193450	104590	0.531511	1.28124	0.784168	0.848136	1.65835
P09914	Interferon-induced protein with tetratricopeptide repeats 1 OS=Homo sapiens OX=9606 GN=IFIT1 PE=1 SV=2	IFIT1	55.36	49	120	19	19	19	16	24	18	20	24	18	16	18	14	16	17	16	16	18	14	16	17	16	16	18	14	16	17	16	43536	203090	83252	70605	241120	111320	191700	766050	420560	314840	1072300	531710	0.348846	1.39402	0.765313	0.572929	1.95132
P09960	Leukotriene A-4 hydrolase OS=Homo sapiens OX=9606 GN=LTA4H PE=1 SV=2	LTA4H	69.284	50.6	143	22	22	22	24	24	23	25	23	24	20	21	20	21	21	22	20	21	20	21	21	22	20	21	20	21	21	22	320610	325310	268740	390640	307570	277700	1132800	1019500	989150	1265000	953480	937220	1.07934	0.971392	0.942474	1.20531	0.908487
P09972	Fructose-bisphosphate aldolase C OS=Homo sapiens OX=9606 GN=ALDOC PE=1 SV=2	ALDOC	39.455	60.2	112	15	12	12	16	17	20	17	22	20	15	15	15	15	15	15	12	12	12	12	12	12	12	12	12	12	12	12	890840	1062800	1039000	938740	1115100	1082800	13157000	13421000	14970000	15910000	14134000	16388000	0.897272	0.915276	1.02091	1.08502	0.963901
Q71UI9	Histone H2A.V OS=Homo sapiens OX=9606 GN=H2AZ2 PE=1 SV=3	H2AZ2	13.509	23.4	12	3	1	1	2	2	2	2	2	2	3	3	3	3	3	3	1	1	1	1	1	1	1	1	1	1	1	1	321610	247460	266810	377010	276230	278420	959660	709170	817670	1131000	792500	873640
P0C7P0	CDGSH iron-sulfur domain-containing protein 3, mitochondrial OS=Homo sapiens OX=9606 GN=CISD3 PE=1 SV=1	CISD3	14.215	10.2	7	2	2	2	2	0	1	2	1	1	2	1	1	2	1	1	2	1	1	2	1	1	2	1	1	2	1	1	5490.5	1859.4	1623.1	4349.2	2100.6	1361.5	30553	0	0	23435	0	0	1.13184			0.868156
P0CAP2	DNA-directed RNA polymerase II subunit GRINL1A OS=Homo sapiens OX=9606 GN=POLR2M PE=1 SV=1	POLR2M	41.739	4.9	1	1	1	1	0	0	0	1	0	0	0	0	0	1	0	0	0	0	0	1	0	0	0	0	0	1	0	0				397.61			0	0	0	0	0	0
P0CG12	Decreased expression in renal and prostate cancer protein OS=Homo sapiens OX=9606 GN=DERPC PE=1 SV=1	DERPC	51.391	4.4	2	1	1	1	0	0	0	1	0	1	0	0	0	1	1	1	0	0	0	1	1	1	0	0	0	1	1	1				279.78	299.47	270.72	0	0	0	0	0	0
P0CG30	Glutathione S-transferase theta-2B OS=Homo sapiens OX=9606 GN=GSTT2B PE=1 SV=1	GSTT2B	27.507	27.5	27	5	5	5	5	5	4	4	4	5	5	5	5	5	5	5	5	5	5	5	5	5	5	5	5	5	5	5	117440	108200	91691	130570	112770	99173	292650	293310	284310	327060	299610	294900	0.979942	0.982152	0.952016	1.09516	1.00325
P0CJ79	Zinc finger protein 888 OS=Homo sapiens OX=9606 GN=ZNF888 PE=3 SV=2	ZNF888	83.548	5.3	11	3	2	3	1	3	3	1	1	2	2	3	3	1	2	3	1	2	2	0	1	2	2	3	3	1	2	3	892.49	1580.6	1727.7	761.76	1308.6	1259	24310	38658	48562	0	32042	29462	0.702463	1.11706	1.40325		0.925887
P0DI82	Trafficking protein particle complex subunit 2B OS=Homo sapiens OX=9606 GN=TRAPPC2B PE=1 SV=1	TRAPPC2B	16.445	24.3	14	3	3	3	2	2	3	1	3	3	3	2	3	2	3	3	3	2	3	2	3	3	3	2	3	2	3	3	9952.2	11107	9140.4	10175	13103	10219	38751	43268	35983	41822	48378	42344	0.927997	1.03617	0.86171	1.00154	1.15854
P0DJD0	RANBP2-like and GRIP domain-containing protein 1 OS=Homo sapiens OX=9606 GN=RGPD1 PE=2 SV=1	RGPD1	196.66	12.2	4	14	1	1	0	1	1	0	1	1	12	14	12	12	13	12	0	1	1	0	1	1	0	1	1	0	1	1		90.653	90.424		110.88	63.334	0	0	0	0	0	0
P0DMN0	Sulfotransferase 1A4 OS=Homo sapiens OX=9606 GN=SULT1A4 PE=1 SV=1	SULT1A4	34.196	39.7	54	8	8	8	7	10	9	9	10	9	7	8	8	8	8	7	7	8	8	8	8	7	7	8	8	8	8	7	56023	78454	74550	79993	97268	62042	195650	311070	265640	272230	316880	274780	0.717433	1.14067	0.974081	0.998246	1.16197
Q5DJT8	Cancer/testis antigen family 45 member A2 OS=Homo sapiens OX=9606 GN=CT45A2 PE=2 SV=3	CT45A2	21.362	57.7	44	9	9	9	10	8	6	6	6	8	7	8	7	7	7	6	7	8	7	7	7	6	7	8	7	7	7	6	297050	244870	162490	271010	186290	219270	769930	641210	704950	772990	770410	676120	1.0655	0.887363	0.975572	1.06973	1.06616
P0DMV9	Heat shock 70 kDa protein 1B OS=Homo sapiens OX=9606 GN=HSPA1B PE=1 SV=1	HSPA1B	70.051	55.9	202	27	14	27	34	35	37	30	32	34	25	27	27	25	27	25	14	14	14	14	14	13	25	27	27	25	27	25	886300	1053100	983450	935200	1151500	1056900	3374400	3882600	3777500	3755800	4273900	4197900	0.87036	1.00144	0.974332	0.968735	1.10237
P0DP25	Calmodulin-3 OS=Homo sapiens OX=9606 GN=CALM3 PE=1 SV=1	CALM3	16.837	57.7	76	9	7	9	12	17	11	10	14	12	8	9	7	7	8	7	7	7	6	6	7	6	8	9	7	7	8	7	1340200	1395300	1341600	1365700	1311400	1300400	4104600	4109800	4543100	4063700	4099800	4359200	0.974185	0.975419	1.07826	0.964478	0.973046
P0DPA3	Putative uncharacterized protein SNHG28 OS=Homo sapiens OX=9606 GN=SNHG28 PE=5 SV=1	SNHG28	25.086	7.2	4	1	1	1	0	0	1	1	1	1	1	1	1	1	1	1	1	1	1	1	1	1	1	1	1	1	1	1	51104	47056	40997	39200	46578	35655	0	0	0	0	0	0
P0DPB6	DNA-directed RNA polymerases I and III subunit RPAC2 OS=Homo sapiens OX=9606 GN=POLR1D PE=1 SV=1	POLR1D	15.237	43.6	16	4	4	4	3	4	3	2	2	2	4	4	3	3	4	3	4	4	3	3	4	3	4	4	3	3	4	3	21873	23340	20311	17813	24327	19167	69607	76025	73938	65325	79438	73933	0.952942	1.04081	1.01223	0.89432	1.08753
P10145	Interleukin-8 OS=Homo sapiens OX=9606 GN=CXCL8 PE=1 SV=1	CXCL8	11.098	16.2	4	1	1	1	1	1	0	1	1	0	1	1	0	1	1	0	1	1	0	1	1	0	1	1	0	1	1	0	4487.8	1110.8		5847.3	1639.7		0	0	0	0	0	0
P10155	60 kDa SS-A/Ro ribonucleoprotein OS=Homo sapiens OX=9606 GN=RO60 PE=1 SV=2	RO60	60.67	37.9	74	14	14	14	13	14	11	13	13	10	12	12	9	11	11	9	12	12	9	11	11	9	12	12	9	11	11	9	44730	49099	31789	58530	52938	33547	311510	287820	257710	330170	282080	253630	1.08482	1.00232	0.897465	1.1498	0.982332
P10253	Lysosomal alpha-glucosidase OS=Homo sapiens OX=9606 GN=GAA PE=1 SV=4	GAA	105.32	11.9	37	8	8	8	7	7	3	7	7	6	7	7	8	7	8	7	7	7	8	7	8	7	7	7	8	7	8	7	33440	29110	27049	38739	30899	25338	922640	624100	472990	1106300	706680	556780	1.26116	0.853083	0.646531	1.5122	0.965962
P10301	Ras-related protein R-Ras OS=Homo sapiens OX=9606 GN=RRAS PE=1 SV=1	RRAS	23.48	33.5	25	5	4	4	4	4	4	4	4	5	5	5	5	5	5	5	4	4	4	4	4	4	4	4	4	4	4	4	36944	21990	22462	35300	24813	25229	269510	142780	152750	250510	152150	181490	1.40713	0.745464	0.797518	1.30793	0.794386
P10321	HLA class I histocompatibility antigen, C alpha chain OS=Homo sapiens OX=9606 GN=HLA-C PE=1 SV=3	HLA-C	40.648	28.1	25	8	3	3	3	5	4	3	5	5	7	6	7	7	8	7	3	3	3	3	3	3	3	3	3	3	3	3	66461	143720	108510	62780	184080	133980	372950	1018500	858520	385110	1312900	1087700	0.444369	1.21354	1.02292	0.458858	1.56432
P10398	Serine/threonine-protein kinase A-Raf OS=Homo sapiens OX=9606 GN=ARAF PE=1 SV=2	ARAF	67.585	24.3	43	12	8	12	5	7	9	8	6	8	8	10	10	9	10	9	6	7	7	7	6	6	8	10	10	9	10	9	13596	15720	15838	17431	19483	16374	108750	108920	116680	121460	109730	115130	0.958614	0.960113	1.02852	1.07065	0.967253
P10412	Histone H1.4 OS=Homo sapiens OX=9606 GN=H1-4 PE=1 SV=2	H1-4	21.865	22.4	6	5	1	1	1	1	1	1	1	1	5	5	5	5	4	4	1	1	1	1	1	1	1	1	1	1	1	1	18746	22028	22928	24559	24726	25067	0	0	0	0	0	0
P10515	Dihydrolipoyllysine-residue acetyltransferase component of pyruvate dehydrogenase complex, mitochondrial OS=Homo sapiens OX=9606 GN=DLAT PE=1 SV=3	DLAT	68.996	40.5	67	17	17	17	12	14	10	10	12	9	16	16	15	15	17	16	16	16	15	15	17	16	16	16	15	15	17	16	98045	75123	78486	96534	86829	73934	726220	606460	634800	712670	619220	599780	1.1175	0.933219	0.976828	1.09665	0.952854
P10586	Receptor-type tyrosine-protein phosphatase F OS=Homo sapiens OX=9606 GN=PTPRF PE=1 SV=2	PTPRF	212.88	14	44	17	17	17	14	4	7	12	2	5	15	10	12	16	9	12	15	10	12	16	9	12	15	10	12	16	9	12	6369.5	2528.1	3956.1	6317.1	2084.5	2388.1	137540	63556	77455	126770	57096	84460	1.509	0.697298	0.849789	1.39084	0.626422
P10599	Thioredoxin OS=Homo sapiens OX=9606 GN=TXN PE=1 SV=3	TXN	11.737	65.7	37	7	7	7	6	7	6	6	8	4	5	7	6	7	7	5	5	7	6	7	7	5	5	7	6	7	7	5	1312400	1322700	1315700	1163400	1402700	1407700	5095200	4885300	4958600	4932300	5169400	5712800	0.994069	0.953118	0.967418	0.962287	1.00855
P10606	Cytochrome c oxidase subunit 5B, mitochondrial OS=Homo sapiens OX=9606 GN=COX5B PE=1 SV=2	COX5B	13.696	55.8	27	5	5	5	4	5	4	4	5	5	4	5	5	5	5	5	4	5	5	5	5	5	4	5	5	5	5	5	120560	138200	137540	141210	134720	131730	595670	595380	561030	587480	537340	558080	1.04048	1.03997	0.979971	1.02617	0.938591
P10619	Lysosomal protective protein OS=Homo sapiens OX=9606 GN=CTSA PE=1 SV=2	CTSA	54.465	21	43	7	7	7	7	8	7	7	8	6	5	6	5	5	6	6	5	6	5	5	6	6	5	6	5	5	6	6	151030	139890	86810	136540	85582	85767	777170	668240	711330	747310	631260	710900	1.09816	0.94424	1.00513	1.05597	0.891986
P10620	Microsomal glutathione S-transferase 1 OS=Homo sapiens OX=9606 GN=MGST1 PE=1 SV=1	MGST1	17.598	27.1	35	4	4	4	6	6	7	5	6	5	4	4	4	4	4	4	4	4	4	4	4	4	4	4	4	4	4	4	780540	701420	711890	756890	720510	734740	1867700	1474900	1535600	1766000	1574000	1624000	1.13859	0.899128	0.936132	1.07659	0.959542
P10644	cAMP-dependent protein kinase type I-alpha regulatory subunit OS=Homo sapiens OX=9606 GN=PRKAR1A PE=1 SV=1	PRKAR1A	42.981	44.9	87	17	15	17	13	17	16	12	14	15	14	16	17	14	15	15	12	14	15	12	13	13	14	16	17	14	15	15	141150	194740	187010	133340	169630	160040	591120	783520	810340	593410	717590	718600	0.841536	1.11544	1.15362	0.844796	1.02158
P10768	S-formylglutathione hydrolase OS=Homo sapiens OX=9606 GN=ESD PE=1 SV=2	ESD	31.462	21.6	24	5	5	5	4	3	5	5	4	3	5	5	5	5	4	4	5	5	5	5	4	4	5	5	5	5	4	4	54439	45999	52880	58599	42209	34071	262400	246030	238270	284330	246790	261760	1.02262	0.95882	0.928578	1.10808	0.961782
P10809	60 kDa heat shock protein, mitochondrial OS=Homo sapiens OX=9606 GN=HSPD1 PE=1 SV=2	HSPD1	61.054	74.2	317	35	35	35	52	61	52	53	53	46	33	33	35	33	35	32	33	33	35	33	35	32	33	33	35	33	35	32	1949600	1959200	1860700	1888300	1951100	1675800	8852800	8176600	8061900	8476700	8023100	7385800	1.08453	1.00169	0.987637	1.03845	0.982884
P11021	Endoplasmic reticulum chaperone BiP OS=Homo sapiens OX=9606 GN=HSPA5 PE=1 SV=2	HSPA5	72.332	49.8	248	32	31	32	42	42	45	43	39	37	32	28	29	31	28	29	31	27	28	30	27	28	32	28	29	31	28	29	2382100	1934400	1952200	2370000	2201800	2169200	7107500	5477900	5852400	7186300	6092900	6401700	1.11874	0.862238	0.921186	1.13115	0.959041
P11047	Laminin subunit gamma-1 OS=Homo sapiens OX=9606 GN=LAMC1 PE=1 SV=3	LAMC1	177.6	9.8	29	12	12	12	3	4	4	4	6	8	8	8	7	8	7	11	8	8	7	8	7	11	8	8	7	8	7	11	2891.2	2751.7	2983.7	2774.5	3207.1	3669.4	50530	54691	61384	54456	70228	77687	0.821679	0.889342	0.998179	0.885521	1.14199
P11055	Myosin-3 OS=Homo sapiens OX=9606 GN=MYH3 PE=1 SV=3	MYH3	223.9	2.1	2	3	2	2	0	0	0	0	2	0	2	2	2	2	3	2	1	1	1	1	2	1	1	1	1	1	2	1	3625.8	2484.3	2170.8	3133.6	4916.5	2390	0	0	0	0	0	0
P11117	Lysosomal acid phosphatase OS=Homo sapiens OX=9606 GN=ACP2 PE=1 SV=3	ACP2	48.344	9.2	17	3	3	3	3	3	3	2	3	3	3	3	3	3	3	3	3	3	3	3	3	3	3	3	3	3	3	3	17315	16044	15940	16445	17462	15173	157430	139400	148490	151120	152920	143560	1.05785	0.936702	0.997783	1.01545	1.02755
P11142	Heat shock cognate 71 kDa protein OS=Homo sapiens OX=9606 GN=HSPA8 PE=1 SV=1	HSPA8	70.897	51.5	241	24	19	22	34	41	45	35	41	45	24	24	24	24	24	24	19	19	19	19	19	19	22	22	22	22	22	22	2037800	2527200	2580100	1922300	2500500	2509900	6441500	7730600	8313500	6067300	7753600	8324300	0.865971	1.03927	1.11764	0.815665	1.04236
P11166	Solute carrier family 2, facilitated glucose transporter member 1 OS=Homo sapiens OX=9606 GN=SLC2A1 PE=1 SV=2	SLC2A1	54.083	14	38	8	8	8	5	7	8	5	7	6	7	8	8	6	8	7	7	8	8	6	8	7	7	8	8	6	8	7	93976	167610	175370	62675	164600	176240	353500	661960	751960	230420	642350	780090	0.620125	1.16124	1.31912	0.404213	1.12684
P11169	Solute carrier family 2, facilitated glucose transporter member 3 OS=Homo sapiens OX=9606 GN=SLC2A3 PE=1 SV=1	SLC2A3	53.924	5.8	10	3	3	3	1	2	2	3	0	2	2	2	2	3	1	2	2	2	2	3	1	2	2	2	2	3	1	2	18503	15706	14618	30335	7207.2	15827	101570	82385	81843	153350	0	92919	0.991765	0.804436	0.799143	1.49736
P11171	Protein 4.1 OS=Homo sapiens OX=9606 GN=EPB41 PE=1 SV=4	EPB41	97.016	13.8	36	9	7	8	7	5	4	8	6	6	8	7	7	9	7	9	7	6	6	7	6	7	8	7	7	8	7	8	7218.9	4511.8	4515.2	8001.9	4606.7	4968.7	71527	44579	47969	82136	42629	43497	1.29135	0.804828	0.866031	1.48288	0.769622
P11172	Uridine 5'-monophosphate synthase OS=Homo sapiens OX=9606 GN=UMPS PE=1 SV=1	UMPS	52.221	40.6	76	13	13	13	14	12	14	13	13	10	12	12	13	12	13	12	12	12	13	12	13	12	12	12	13	12	13	12	82850	93619	85906	75724	90176	75255	287480	308680	300830	270700	284910	276840	0.997363	1.07091	1.04368	0.939148	0.988447
P11177	Pyruvate dehydrogenase E1 component subunit beta, mitochondrial OS=Homo sapiens OX=9606 GN=PDHB PE=1 SV=3	PDHB	39.233	55.4	50	12	12	12	7	10	10	8	8	7	10	11	11	10	10	8	10	11	11	10	10	8	10	11	11	10	10	8	144630	141270	131010	159680	138990	118840	700760	666990	646280	775970	667060	650720	1.02356	0.974234	0.943984	1.13342	0.974337
P11182	Lipoamide acyltransferase component of branched-chain alpha-keto acid dehydrogenase complex, mitochondrial OS=Homo sapiens OX=9606 GN=DBT PE=1 SV=3	DBT	53.486	12.7	17	4	4	4	3	3	2	2	4	3	4	4	2	3	4	4	4	4	2	3	4	4	4	4	2	3	4	4	2627.4	2723.9	1600.9	2816.5	2651.8	2148.2	28765	30570	27930	36840	29113	25948	0.963297	1.02374	0.935334	1.23372	0.974951
P11216	Glycogen phosphorylase, brain form OS=Homo sapiens OX=9606 GN=PYGB PE=1 SV=5	PYGB	96.695	59.3	266	41	30	41	41	45	44	48	42	46	35	37	37	40	36	37	24	26	26	29	25	26	35	37	37	40	36	37	524340	598600	479270	765750	518000	413410	2430200	2628200	2276200	3528300	2353500	1927500	0.962843	1.04129	0.901828	1.39791	0.932455
P11217	Glycogen phosphorylase, muscle form OS=Homo sapiens OX=9606 GN=PYGM PE=1 SV=6	PYGM	97.091	20.5	3	14	2	2	1	1	0	1	0	0	13	13	13	14	13	13	1	1	1	2	1	1	1	1	1	2	1	1	1685.7	1559.5	1249.1	26879	900.72	1282.2	0	0	0	0	0	0
P11233	Ras-related protein Ral-A OS=Homo sapiens OX=9606 GN=RALA PE=1 SV=1	RALA	23.567	22.8	24	4	2	2	4	4	4	4	4	4	4	4	4	4	4	4	2	2	2	2	2	2	2	2	2	2	2	2	146790	119700	117600	133560	115050	114100	616670	482070	503240	567880	467570	516960	1.17298	0.916951	0.957218	1.08017	0.88937
P11234	Ras-related protein Ral-B OS=Homo sapiens OX=9606 GN=RALB PE=1 SV=1	RALB	23.408	28.2	55	7	5	7	8	10	10	9	10	8	6	7	7	7	7	7	4	5	5	5	5	5	6	7	7	7	7	7	228890	241670	230420	231330	229680	221240	901280	870910	885100	924740	828170	848880	1.02826	0.993607	1.0098	1.05502	0.944846
P11274	Breakpoint cluster region protein OS=Homo sapiens OX=9606 GN=BCR PE=1 SV=2	BCR	142.82	18.8	64	18	16	18	12	12	10	10	11	9	13	15	14	14	13	12	12	14	12	12	12	10	13	15	14	14	13	12	8984.2	10839	9572	7667.2	8756.4	7200.4	139130	151670	153410	139170	144520	146240	0.954973	1.04105	1.05299	0.955247	0.991969
P11279	Lysosome-associated membrane glycoprotein 1 OS=Homo sapiens OX=9606 GN=LAMP1 PE=1 SV=3	LAMP1	44.882	14.1	29	6	6	6	5	5	5	4	5	5	5	6	6	4	5	6	5	6	6	4	5	6	5	6	6	4	5	6	25275	41178	40171	23226	31386	39472	358980	431980	430810	331970	416520	408630	0.905414	1.08953	1.08658	0.83729	1.05054
P11310	Medium-chain specific acyl-CoA dehydrogenase, mitochondrial OS=Homo sapiens OX=9606 GN=ACADM PE=1 SV=1	ACADM	46.588	14.5	29	5	5	5	4	5	6	4	4	6	4	4	5	4	5	5	4	4	5	4	5	5	4	4	5	4	5	5	22282	21932	28410	24223	25490	28689	199240	181580	190910	214210	175050	193640	1.03534	0.943575	0.992058	1.11314	0.909642
P11387	DNA topoisomerase 1 OS=Homo sapiens OX=9606 GN=TOP1 PE=1 SV=2	TOP1	90.725	35.7	132	26	26	26	24	25	22	19	23	19	26	25	25	22	25	25	26	25	25	22	25	25	26	25	25	22	25	25	158850	163890	160870	146850	159420	138870	835310	800350	841150	815160	777170	791770	1.03105	0.987901	1.03826	1.00618	0.95929
P11388	DNA topoisomerase 2-alpha OS=Homo sapiens OX=9606 GN=TOP2A PE=1 SV=3	TOP2A	174.38	32.8	170	41	31	41	18	34	34	14	36	34	27	40	37	19	36	39	17	30	27	9	27	29	27	40	37	19	36	39	15465	52595	43470	10593	46705	44164	86863	262800	234020	67977	256560	231090	0.457451	1.384	1.23243	0.35799	1.35113
P11413	Glucose-6-phosphate 1-dehydrogenase OS=Homo sapiens OX=9606 GN=G6PD PE=1 SV=4	G6PD	59.256	77.3	281	36	36	36	45	41	47	51	50	47	34	33	34	35	35	35	34	33	34	35	35	35	34	33	34	35	35	35	978130	843590	863420	1302100	865390	937870	2658200	2232400	2449900	3492900	2282600	2673300	1.01013	0.848321	0.930972	1.32732	0.867398
P11441	Ubiquitin-like protein 4A OS=Homo sapiens OX=9606 GN=UBL4A PE=1 SV=1	UBL4A	17.776	51.6	33	7	7	7	5	5	7	5	6	5	7	7	7	6	6	7	7	7	7	6	6	7	7	7	7	6	6	7	124630	121580	120200	113660	99343	114100	271880	263550	279050	274890	252440	273890	1.00964	0.978709	1.03627	1.02082	0.937451
P11474	Steroid hormone receptor ERR1 OS=Homo sapiens OX=9606 GN=ESRRA PE=1 SV=3	ESRRA	45.509	5.9	5	2	2	2	1	1	1	1	1	0	1	1	1	1	1	0	1	1	1	1	1	0	1	1	1	1	1	0	286.45	428.39	92.922	271.1	403.34		0	0	0	0	0	0
P11498	Pyruvate carboxylase, mitochondrial OS=Homo sapiens OX=9606 GN=PC PE=1 SV=2	PC	129.63	35.2	163	29	29	29	29	26	24	26	28	30	28	28	26	26	26	27	28	28	26	26	26	27	28	28	26	26	26	27	45929	48883	41763	49234	50107	54076	250550	269080	255840	304680	271750	302830	0.908487	0.975676	0.927668	1.10476	0.985357
P11586	C-1-tetrahydrofolate synthase, cytoplasmic OS=Homo sapiens OX=9606 GN=MTHFD1 PE=1 SV=4	MTHFD1	101.53	50.3	272	38	38	38	45	46	43	44	49	45	36	37	36	34	37	37	36	37	36	34	37	37	36	37	36	34	37	37	395020	396860	392890	386620	389050	400680	1372500	1345600	1388100	1429400	1317000	1376100	1.00077	0.981151	1.01214	1.04225	0.960297
P11717	Cation-independent mannose-6-phosphate receptor OS=Homo sapiens OX=9606 GN=IGF2R PE=1 SV=3	IGF2R	274.37	29.1	181	48	48	48	44	26	30	30	25	26	46	38	39	43	36	40	46	38	39	43	36	40	46	38	39	43	36	40	36440	16240	21215	27705	16198	22512	325370	151180	204960	258190	156740	203880	1.50134	0.697582	0.945736	1.19135	0.723237
P11766	Alcohol dehydrogenase class-3 OS=Homo sapiens OX=9606 GN=ADH5 PE=1 SV=4	ADH5	39.724	47.9	92	14	14	14	16	15	16	15	17	13	14	14	14	14	14	14	14	14	14	14	14	14	14	14	14	14	14	14	332700	326440	317080	352700	319260	303660	1028300	966400	1012100	1124600	961970	1017500	1.00964	0.948867	0.993737	1.1042	0.944517
P11802	Cyclin-dependent kinase 4 OS=Homo sapiens OX=9606 GN=CDK4 PE=1 SV=2	CDK4	33.729	44.6	33	10	9	9	4	9	6	1	8	5	6	8	9	5	8	7	5	8	9	4	8	6	5	8	9	4	8	6	16179	28826	24357	5214	26943	20361	109470	179810	148510	82895	173060	153960	0.774821	1.27268	1.05114	0.586725	1.22491
P11908	Ribose-phosphate pyrophosphokinase 2 OS=Homo sapiens OX=9606 GN=PRPS2 PE=1 SV=2	PRPS2	34.769	47.5	29	10	4	4	4	5	6	4	5	5	9	10	10	8	10	10	4	4	4	4	4	4	4	4	4	4	4	4	67485	72614	71944	69349	80962	76413	275140	283800	304560	287730	306120	320770	0.928419	0.957641	1.02769	0.970902	1.03296
P11940	Polyadenylate-binding protein 1 OS=Homo sapiens OX=9606 GN=PABPC1 PE=1 SV=2	PABPC1	70.67	48.7	155	24	17	24	28	29	25	23	27	23	23	24	21	21	22	21	16	17	15	15	15	15	23	24	21	21	22	21	472090	532410	446440	437500	524200	435900	1896800	2034700	2096700	1864700	2121900	2101600	0.939289	1.00758	1.03828	0.923393	1.05076
P12004	Proliferating cell nuclear antigen OS=Homo sapiens OX=9606 GN=PCNA PE=1 SV=1	PCNA	28.768	55.2	71	12	12	12	12	13	14	8	13	11	12	12	12	11	11	11	12	12	12	11	11	11	12	12	12	11	11	11	357200	609620	572460	350010	604480	574710	1917100	3194200	3204600	1924100	3177900	3233500	0.690789	1.15097	1.15471	0.693311	1.14509
P12074	Cytochrome c oxidase subunit 6A1, mitochondrial OS=Homo sapiens OX=9606 GN=COX6A1 PE=1 SV=4	COX6A1	12.155	43.1	15	2	2	2	3	2	2	4	1	3	2	1	1	2	1	2	2	1	1	2	1	2	2	1	1	2	1	2	90386	61486	68176	218990	66968	81798	370890	283340	435770	412770	357940	398360	0.985069	0.75254	1.15739	1.0963	0.950674
P12081	Histidine--tRNA ligase, cytoplasmic OS=Homo sapiens OX=9606 GN=HARS1 PE=1 SV=2	HARS1	57.41	52.8	111	21	15	21	22	18	18	18	18	17	21	20	18	20	20	18	15	15	13	14	14	12	21	20	18	20	20	18	178080	168470	149790	163910	158190	154090	462710	446260	461510	431370	426580	420820	1.04794	1.01069	1.04522	0.976963	0.966115
P12109	Collagen alpha-1(VI) chain OS=Homo sapiens OX=9606 GN=COL6A1 PE=1 SV=3	COL6A1	108.53	11.5	30	8	8	8	6	3	4	6	5	6	6	6	5	7	6	7	6	6	5	7	6	7	6	6	5	7	6	7	2362.4	1882.8	1820.3	3246.3	3102.4	3364.3	37722	27551	32193	49311	44988	50502	0.934225	0.68233	0.797294	1.22124	1.11418
P12235	ADP/ATP translocase 1 OS=Homo sapiens OX=9606 GN=SLC25A4 PE=1 SV=4	SLC25A4	33.064	43	16	12	3	3	3	2	3	3	2	3	12	12	12	12	11	12	3	3	3	3	2	3	3	3	3	3	2	3	32462	15675	25831	29984	15588	23637	262630	199730	212480	243300	209930	207280	1.18005	0.897428	0.954716	1.0932	0.943258
P12236	ADP/ATP translocase 3 OS=Homo sapiens OX=9606 GN=SLC25A6 PE=1 SV=4	SLC25A6	32.866	52.3	117	16	5	16	21	18	19	21	19	19	15	15	15	15	15	16	4	4	4	4	4	5	15	15	15	15	15	16	1438400	1322700	1323400	1413400	1591800	1248800	8915300	7808600	8558700	8514700	7588800	8111400	1.0807	0.946545	1.03747	1.03214	0.919901
P12268	Inosine-5'-monophosphate dehydrogenase 2 OS=Homo sapiens OX=9606 GN=IMPDH2 PE=1 SV=2	IMPDH2	55.804	50.2	198	26	25	26	31	38	32	35	32	30	26	26	26	26	26	26	25	25	25	25	25	25	26	26	26	26	26	26	1045300	1004600	978550	1007700	959410	893480	1801100	1663900	1755000	1780000	1619800	1645900	1.05269	0.972501	1.02575	1.04036	0.946726
P12270	Nucleoprotein TPR OS=Homo sapiens OX=9606 GN=TPR PE=1 SV=3	TPR	267.29	33.4	296	59	59	59	51	49	52	47	51	46	52	53	53	49	53	53	52	53	53	49	53	53	52	53	53	49	53	53	59761	53146	48875	58386	57488	53286	443490	390420	398200	453530	403650	424750	1.05843	0.931775	0.950343	1.08239	0.96335
P12277	Creatine kinase B-type OS=Homo sapiens OX=9606 GN=CKB PE=1 SV=1	CKB	42.644	52	57	13	12	13	9	9	8	6	12	13	11	13	11	9	12	12	11	12	10	9	12	11	11	13	11	9	12	12	55201	88829	52697	37274	113500	97047	154850	181290	166890	116780	333420	293090	0.745475	0.872761	0.803437	0.562199	1.60514
P12429	Annexin A3 OS=Homo sapiens OX=9606 GN=ANXA3 PE=1 SV=3	ANXA3	36.375	61.3	122	17	17	17	20	20	22	21	20	19	16	16	17	16	17	16	16	16	17	16	17	16	16	16	17	16	17	16	695030	607760	598720	629640	576010	521660	2215000	1862400	1913400	2004000	1751500	1724600	1.15858	0.974152	1.00083	1.04822	0.916144
P12532	Creatine kinase U-type, mitochondrial OS=Homo sapiens OX=9606 GN=CKMT1A PE=1 SV=1	CKMT1A	47.036	24.2	37	7	7	7	7	7	6	6	6	5	7	7	6	6	6	6	7	7	6	6	6	6	7	7	6	6	6	6	27852	20525	17625	16402	21836	16906	173770	118320	113010	104440	132170	113560	1.38046	0.939955	0.897772	0.82969	1.04998
P12694	2-oxoisovalerate dehydrogenase subunit alpha, mitochondrial OS=Homo sapiens OX=9606 GN=BCKDHA PE=1 SV=2	BCKDHA	50.47	22.5	18	7	7	7	4	3	3	1	3	4	6	7	7	7	7	7	6	7	7	7	7	7	6	7	7	7	7	7	6877.6	8561.9	7381.8	9672.9	10087	9736.4	38677	41193	37389	47167	46874	49110	0.891141	0.949111	0.861465	1.08676	1.08001
P12814	Alpha-actinin-1 OS=Homo sapiens OX=9606 GN=ACTN1 PE=1 SV=2	ACTN1	103.06	66	308	51	27	34	54	53	52	51	53	45	48	49	49	49	51	49	27	26	26	26	27	26	32	32	32	32	34	33	955340	864330	853010	786480	842890	811120	2918300	2505600	2624000	2397800	2413500	2534600	1.13746	0.976601	1.02275	0.934584	0.940703
P12830	Cadherin-1 OS=Homo sapiens OX=9606 GN=CDH1 PE=1 SV=3	CDH1	97.455	12.2	31	7	7	7	4	5	5	6	5	6	7	7	6	7	6	7	7	7	6	7	6	7	7	7	6	7	6	7	59566	64454	61101	70004	61802	57894	695810	761710	798050	845980	758620	725470	0.91042	0.996646	1.04419	1.10691	0.992603
P12883	Myosin-7 OS=Homo sapiens OX=9606 GN=MYH7 PE=1 SV=5	MYH7	223.09	1	4	2	1	1	1	0	0	1	1	1	2	2	2	2	2	2	1	1	1	1	1	1	1	1	1	1	1	1	1833.1	1859.4	1459.4	2615.3	1622.9	1822.9	0	0	0	0	0	0
P12931	Proto-oncogene tyrosine-protein kinase Src OS=Homo sapiens OX=9606 GN=SRC PE=1 SV=3	SRC	59.834	21.1	30	9	5	9	5	7	5	2	6	5	8	7	9	7	9	9	4	3	5	3	5	5	8	7	9	7	9	9	19306	13431	18700	18909	18327	19224	166970	132170	158650	186630	145190	161630	1.05317	0.83367	1.00069	1.17718	0.915794
P12955	Xaa-Pro dipeptidase OS=Homo sapiens OX=9606 GN=PEPD PE=1 SV=3	PEPD	54.548	37.7	87	14	14	14	14	17	14	12	15	15	13	14	13	12	13	13	13	14	13	12	13	13	13	14	13	12	13	13	79617	69197	65793	77671	65661	67510	522190	417040	417310	524380	412240	442010	1.1455	0.914839	0.915431	1.1503	0.904309
P12956	X-ray repair cross-complementing protein 6 OS=Homo sapiens OX=9606 GN=XRCC6 PE=1 SV=2	XRCC6	69.842	50.7	209	28	28	28	34	38	38	32	32	35	27	28	28	26	27	26	27	28	28	26	27	26	27	28	28	26	27	26	571750	552070	539090	555290	511310	505850	2161900	1998300	2031300	2226600	1857200	1926500	1.06307	0.982626	0.998853	1.09489	0.913242
P13010	X-ray repair cross-complementing protein 5 OS=Homo sapiens OX=9606 GN=XRCC5 PE=1 SV=3	XRCC5	82.704	52.2	186	30	30	30	30	29	30	34	32	31	28	29	27	28	30	27	28	29	27	28	30	27	28	29	27	28	30	27	409330	405530	381050	418270	381170	360460	1619400	1526700	1524400	1662000	1437500	1490300	1.04925	0.98919	0.9877	1.07685	0.931395
P13051	Uracil-DNA glycosylase OS=Homo sapiens OX=9606 GN=UNG PE=1 SV=2	UNG	34.645	7	4	1	1	1	0	0	1	1	1	1	0	1	1	1	1	1	0	1	1	1	1	1	0	1	1	1	1	1		1410.3	1117.3	697.44	1969.4	2009	0	0	0	0	0	0
P13073	Cytochrome c oxidase subunit 4 isoform 1, mitochondrial OS=Homo sapiens OX=9606 GN=COX4I1 PE=1 SV=1	COX4I1	19.576	42	55	8	8	8	9	11	10	7	9	9	8	8	8	8	8	7	8	8	8	8	8	7	8	8	8	8	8	7	317520	353220	349570	315190	371400	356480	1033000	1157100	1230300	1037200	1243500	1323900	0.882278	0.98827	1.05079	0.885865	1.06206
P13196	5-aminolevulinate synthase, nonspecific, mitochondrial OS=Homo sapiens OX=9606 GN=ALAS1 PE=1 SV=2	ALAS1	70.58	15	27	7	7	7	3	6	5	4	4	5	5	7	7	4	4	6	5	7	7	4	4	6	5	7	7	4	4	6	2358	4274.2	3232	1257.3	2632	3283.5	20049	30698	24806	15147	30374	26970	0.812556	1.24414	1.00535	0.613885	1.23101
P13284	Gamma-interferon-inducible lysosomal thiol reductase OS=Homo sapiens OX=9606 GN=IFI30 PE=1 SV=3	IFI30	27.963	12	6	2	2	2	2	0	0	2	2	0	2	2	2	2	2	1	2	2	2	2	2	1	2	2	2	2	2	1	4851.8	3543.6	3402	5228.3	5119.3	3292.6	38374	24491	23308	27618	29382	0	1.34013	0.855294	0.81398	0.964497	1.0261
P13473	Lysosome-associated membrane glycoprotein 2 OS=Homo sapiens OX=9606 GN=LAMP2 PE=1 SV=2	LAMP2	44.96	13.7	26	5	5	5	5	4	4	3	5	5	5	5	4	3	5	4	5	5	4	3	5	4	5	5	4	3	5	4	72767	108290	93144	59411	100380	89014	821620	1379400	1133800	732050	1175100	1222500	0.762587	1.28029	1.05234	0.679452	1.09067
P13489	Ribonuclease inhibitor OS=Homo sapiens OX=9606 GN=RNH1 PE=1 SV=2	RNH1	49.973	74.6	150	22	22	22	25	27	22	24	24	28	21	21	21	20	22	21	21	21	21	20	22	21	21	21	21	20	22	21	439230	453570	420710	443720	439410	429120	1117200	1090500	1103300	1118000	1035200	1078700	1.0245	1.00002	1.01175	1.02523	0.949304
P13498	Cytochrome b-245 light chain OS=Homo sapiens OX=9606 GN=CYBA PE=1 SV=3	CYBA	21.012	28.7	15	3	3	3	2	2	3	3	2	3	3	3	3	3	3	3	3	3	3	3	3	3	3	3	3	3	3	3	66349	101030	86286	51854	56971	50545	209340	306270	266240	156460	267030	249660	0.863258	1.26297	1.0979	0.645196	1.10116
P13639	Elongation factor 2 OS=Homo sapiens OX=9606 GN=EEF2 PE=1 SV=4	EEF2	95.337	67.9	470	56	55	56	77	81	81	71	82	78	53	54	54	50	54	52	52	53	53	49	53	51	53	54	54	50	54	52	2385000	2583100	2591900	2102800	2643000	2570500	7124700	7592500	7881000	6458000	7631000	7728800	0.96245	1.02564	1.06462	0.872388	1.03085
P13667	Protein disulfide-isomerase A4 OS=Homo sapiens OX=9606 GN=PDIA4 PE=1 SV=2	PDIA4	72.932	58.4	269	37	36	37	45	44	45	44	48	43	37	37	37	37	37	37	36	36	36	36	36	36	37	37	37	37	37	37	1106100	951730	961480	1166200	990910	982000	5033300	4129400	4464000	5504400	4315200	4697900	1.07304	0.880338	0.95167	1.17347	0.919948
P13674	Prolyl 4-hydroxylase subunit alpha-1 OS=Homo sapiens OX=9606 GN=P4HA1 PE=1 SV=2	P4HA1	61.049	37.8	74	15	15	15	11	12	11	14	13	13	13	14	12	15	14	14	13	14	12	15	14	14	13	14	12	15	14	14	80131	100380	69302	109100	118720	130060	301070	400020	379010	402410	485440	517590	0.726772	0.965633	0.914916	0.971403	1.17183
P13686	Tartrate-resistant acid phosphatase type 5 OS=Homo sapiens OX=9606 GN=ACP5 PE=1 SV=3	ACP5	36.598	17.5	10	3	3	3	2	2	2	1	1	2	2	3	3	2	3	3	2	3	3	2	3	3	2	3	3	2	3	3	2919.7	8564.9	9184.9	1586.4	8485.6	8984.3	18967	32589	36691	22449	34252	38158	0.621509	1.06787	1.20229	0.735607	1.12237
P13693	Translationally-controlled tumor protein OS=Homo sapiens OX=9606 GN=TPT1 PE=1 SV=1	TPT1	19.595	19.8	21	3	3	3	3	3	4	3	4	4	3	3	3	3	3	3	3	3	3	3	3	3	3	3	3	3	3	3	291910	358980	331400	288230	367770	332510	1212500	1543000	1492700	1207400	1520300	1486600	0.859675	1.094	1.05834	0.856059	1.07791
P13716	Delta-aminolevulinic acid dehydratase OS=Homo sapiens OX=9606 GN=ALAD PE=1 SV=1	ALAD	36.294	21.2	24	6	6	6	3	5	4	4	3	5	4	5	4	5	5	5	4	5	4	5	5	5	4	5	4	5	5	5	20200	24153	19635	39313	20511	20305	117090	138650	107260	171660	145180	119860	0.878504	1.04026	0.804752	1.28793	1.08926
P13726	Tissue factor OS=Homo sapiens OX=9606 GN=F3 PE=1 SV=1	F3	33.067	10.2	7	2	2	2	1	2	1	1	1	1	1	2	1	1	1	2	1	2	1	1	1	2	1	2	1	1	1	2	6274	16652	9098.4	5015.4	12637	13527	0	155420	0	0	0	141780		1.0459
P13747	HLA class I histocompatibility antigen, alpha chain E OS=Homo sapiens OX=9606 GN=HLA-E PE=1 SV=4	HLA-E	40.057	16.5	3	4	2	2	0	1	0	0	2	0	2	3	2	1	3	2	1	2	1	1	2	1	1	2	1	1	2	1	4500.2	4983.7	3320.1	3469	7121	3284.6	0	62837	0	0	95885	0		0.791787			1.20821
P13796	Plastin-2 OS=Homo sapiens OX=9606 GN=LCP1 PE=1 SV=6	LCP1	70.288	54.4	72	26	19	20	15	12	13	8	14	10	24	22	23	19	24	22	18	16	17	13	17	16	18	16	17	13	18	16	97338	84868	95389	47713	80529	71992	583860	478200	516220	284870	449430	433820	1.27555	1.04471	1.12777	0.622349	0.98186
P13797	Plastin-3 OS=Homo sapiens OX=9606 GN=PLS3 PE=1 SV=4	PLS3	70.81	62.1	241	35	27	35	41	43	37	35	46	39	34	33	34	31	35	34	26	25	26	23	27	26	34	33	34	31	35	34	509130	603220	548990	457030	555290	533720	1938300	2131300	2142000	1786700	1963700	2062300	0.967191	1.0635	1.06884	0.891545	0.979866
P13798	Acylamino-acid-releasing enzyme OS=Homo sapiens OX=9606 GN=APEH PE=1 SV=4	APEH	81.224	47	114	20	20	20	21	19	19	19	18	18	20	20	18	16	20	17	20	20	18	16	20	17	20	20	18	16	20	17	176270	166830	165590	167270	157870	138210	761590	686280	699540	807130	665660	682350	1.06205	0.957032	0.975524	1.12556	0.928277
P13804	Electron transfer flavoprotein subunit alpha, mitochondrial OS=Homo sapiens OX=9606 GN=ETFA PE=1 SV=1	ETFA	35.079	56.5	87	12	12	12	14	15	14	14	16	14	12	12	12	12	12	12	12	12	12	12	12	12	12	12	12	12	12	12	402960	355510	327550	437750	334880	304000	1357300	1145600	1120300	1482200	1108600	1092900	1.11454	0.9407	0.919925	1.2171	0.910318
P13807	Glycogen [starch] synthase, muscle OS=Homo sapiens OX=9606 GN=GYS1 PE=1 SV=2	GYS1	83.785	29.9	68	14	14	14	9	12	12	12	12	11	11	13	12	12	13	12	11	13	12	12	13	12	11	13	12	12	13	12	34078	30911	32394	34561	31814	31458	469830	461420	436110	456340	505930	456450	1.01181	0.993697	0.939191	0.982757	1.08955
P13861	cAMP-dependent protein kinase type II-alpha regulatory subunit OS=Homo sapiens OX=9606 GN=PRKAR2A PE=1 SV=2	PRKAR2A	45.518	49.5	84	14	13	14	16	14	13	14	13	14	14	14	13	13	13	12	13	13	12	12	12	11	14	14	13	13	13	12	123860	97585	92067	116660	82094	83182	521660	387680	426540	516820	362500	412430	1.19117	0.885239	0.973973	1.18012	0.827742
Q5VT79	Annexin A8-like protein 1 OS=Homo sapiens OX=9606 GN=ANXA8L1 PE=2 SV=2	ANXA8L1	36.879	28.4	35	7	7	7	4	4	6	5	8	8	6	6	7	6	7	7	6	6	7	6	7	7	6	6	7	6	7	7	23280	78188	42576	43329	76340	52286	172190	385960	228010	240280	420000	305490	0.589715	1.32183	0.780887	0.82291	1.43841
P13984	General transcription factor IIF subunit 2 OS=Homo sapiens OX=9606 GN=GTF2F2 PE=1 SV=2	GTF2F2	28.38	49.4	33	9	9	9	4	6	5	4	8	6	6	9	8	8	9	7	6	9	8	8	9	7	6	9	8	8	9	7	17314	16890	15427	16032	16277	13366	92241	80581	90899	95676	90998	87549	1.02882	0.898766	1.01385	1.06713	1.01495
P13987	CD59 glycoprotein OS=Homo sapiens OX=9606 GN=CD59 PE=1 SV=1	CD59	14.177	25	17	3	3	3	3	3	2	3	3	3	3	3	3	3	2	3	3	3	3	3	2	3	3	3	3	3	2	3	272090	277150	259240	269480	268270	262790	1132100	1117100	1113600	1090400	1113500	1092900	1.01997	1.00646	1.0033	0.982401	1.00321
P13995	Bifunctional methylenetetrahydrofolate dehydrogenase/cyclohydrolase, mitochondrial OS=Homo sapiens OX=9606 GN=MTHFD2 PE=1 SV=2	MTHFD2	37.895	37.1	33	8	8	8	4	4	8	5	7	5	6	6	7	6	7	6	6	6	7	6	7	6	6	6	7	6	7	6	21030	25715	28842	18967	27171	22182	123110	177890	166870	109520	139020	136330	0.866219	1.25166	1.17412	0.770598	0.978165
P14174	Macrophage migration inhibitory factor OS=Homo sapiens OX=9606 GN=MIF PE=1 SV=4	MIF	12.476	83.5	100	5	5	5	16	17	17	18	14	18	5	5	5	5	5	5	5	5	5	5	5	5	5	5	5	5	5	5	3645700	4159600	4120900	4204400	4437700	3949900	10347000	11743000	10209000	11293000	11657000	10455000	0.944874	1.07235	0.932272	1.03126	1.0645
P14209	CD99 antigen OS=Homo sapiens OX=9606 GN=CD99 PE=1 SV=1	CD99	18.848	24.3	11	2	2	2	2	2	1	2	2	2	2	2	2	2	2	2	2	2	2	2	2	2	2	2	2	2	2	2	64754	39581	49695	74256	45373	51919	184320	95890	137260	206030	120850	151780	1.23411	0.642027	0.919018	1.37946	0.809146
P14314	Glucosidase 2 subunit beta OS=Homo sapiens OX=9606 GN=PRKCSH PE=1 SV=2	PRKCSH	59.425	49.1	117	16	16	16	20	18	20	19	18	22	15	15	15	15	16	15	15	15	15	15	16	15	15	15	15	15	16	15	452640	458350	427330	419640	481620	448540	1381000	1326600	1293900	1273800	1342500	1427100	1.02997	0.989397	0.965009	0.950018	1.00126
P14324	Farnesyl pyrophosphate synthase OS=Homo sapiens OX=9606 GN=FDPS PE=1 SV=4	FDPS	48.275	26.3	52	11	11	11	10	8	9	7	7	11	10	11	11	10	9	10	10	11	11	10	9	10	10	11	11	10	9	10	139010	140930	142710	139730	119960	129390	652990	573000	613100	630280	531760	541800	1.10585	0.970383	1.03829	1.06739	0.900543
P14373	Zinc finger protein RFP OS=Homo sapiens OX=9606 GN=TRIM27 PE=1 SV=1	TRIM27	58.489	2.7	6	1	1	1	1	1	1	1	1	1	1	1	1	1	1	1	1	1	1	1	1	1	1	1	1	1	1	1	836.92	547.27	608.62	897.06	620.05	411.2	0	0	0	0	0	0
P14384	Carboxypeptidase M OS=Homo sapiens OX=9606 GN=CPM PE=1 SV=2	CPM	50.513	9.3	11	3	3	3	2	1	1	2	2	3	2	2	2	2	2	3	2	2	2	2	2	3	2	2	2	2	2	3	4798.7	3624.9	4116.1	4159	3134.8	3915.6	84891	64662	75521	75928	49073	65409	1.22591	0.933783	1.0906	1.09648	0.708663
P14406	Cytochrome c oxidase subunit 7A2, mitochondrial OS=Homo sapiens OX=9606 GN=COX7A2 PE=1 SV=1	COX7A2	9.3959	27.7	8	2	2	2	2	1	1	2	1	1	2	1	1	2	1	1	2	1	1	2	1	1	2	1	1	2	1	1	346900	241610	202370	340890	239060	209810	1047100	0	0	1020400	0	0	1.01291			0.987086
P14550	Aldo-keto reductase family 1 member A1 OS=Homo sapiens OX=9606 GN=AKR1A1 PE=1 SV=3	AKR1A1	36.573	54.2	81	14	14	14	14	14	12	15	14	12	13	13	14	13	14	13	13	13	14	13	14	13	13	13	14	13	14	13	325290	376310	308520	372530	386200	366040	6363100	5785400	5189400	8774100	5614100	5308400	1.03089	0.937299	0.84074	1.4215	0.909547
P14618	Pyruvate kinase PKM OS=Homo sapiens OX=9606 GN=PKM PE=1 SV=4	PKM	57.936	74.2	597	38	38	38	94	98	107	93	104	101	35	38	38	37	38	38	35	38	38	37	38	38	35	38	38	37	38	38	7764800	9337000	9027800	8449900	9027200	9203300	22274000	24730000	25174000	23371000	23497000	25991000	0.921448	1.02305	1.04142	0.966829	0.972042
P14625	Endoplasmin OS=Homo sapiens OX=9606 GN=HSP90B1 PE=1 SV=1	HSP90B1	92.468	55.2	298	42	35	42	49	46	44	53	52	54	40	41	42	39	42	42	35	34	35	33	35	35	40	41	42	39	42	42	881890	798820	837360	911900	911380	941840	2962300	2546100	2762200	3171600	2888000	3157100	1.01638	0.873583	0.947728	1.0882	0.990891
P14635	G2/mitotic-specific cyclin-B1 OS=Homo sapiens OX=9606 GN=CCNB1 PE=1 SV=1	CCNB1	48.337	18	10	5	4	4	1	3	1	0	2	3	1	5	5	2	5	4	1	4	4	2	4	3	1	4	4	2	4	3	1310.2	14975	13104	613.73	18056	9670.6	0	129990	60956	9027.3	137220	118050		1.4277	0.669488	0.099148	1.50711
P14649	Myosin light chain 6B OS=Homo sapiens OX=9606 GN=MYL6B PE=1 SV=1	MYL6B	22.764	32.2	22	7	5	5	4	4	3	4	4	3	6	7	5	7	6	4	4	5	3	5	4	3	4	5	3	5	4	3	16877	17572	11210	21062	14217	9806.5	93617	75777	71326	97527	63827	55020	1.22885	0.994679	0.936254	1.28018	0.837819
P63162	Small nuclear ribonucleoprotein-associated protein N OS=Homo sapiens OX=9606 GN=SNRPN PE=1 SV=1	SNRPN	24.614	24.6	47	7	7	7	7	11	6	9	8	6	7	7	7	7	7	7	7	7	7	7	7	7	7	7	7	7	7	7	172060	174740	179470	190260	178010	180650	772870	733740	743260	826620	756310	761050	1.00944	0.958333	0.970767	1.07964	0.987812
P14735	Insulin-degrading enzyme OS=Homo sapiens OX=9606 GN=IDE PE=1 SV=4	IDE	117.97	31	109	23	23	23	20	17	19	17	18	18	19	21	20	21	21	21	19	21	20	21	21	21	19	21	20	21	21	21	36252	44079	37477	37684	39924	40739	284970	301440	307370	289520	282850	302840	0.966552	1.02241	1.04253	0.981984	0.959361
P14854	Cytochrome c oxidase subunit 6B1 OS=Homo sapiens OX=9606 GN=COX6B1 PE=1 SV=2	COX6B1	10.192	47.7	19	3	3	3	4	3	3	3	4	2	3	3	3	3	3	3	3	3	3	3	3	3	3	3	3	3	3	3	145510	140700	114200	150050	165110	110890	733190	735650	671740	779150	782120	624230	1.01689	1.0203	0.931661	1.08063	1.08475
P14866	Heterogeneous nuclear ribonucleoprotein L OS=Homo sapiens OX=9606 GN=HNRNPL PE=1 SV=2	HNRNPL	64.132	56	114	17	17	17	19	22	17	20	19	17	15	17	14	15	14	14	15	17	14	15	14	14	15	17	14	15	14	14	435710	428760	400590	483420	399390	446740	1375500	1333800	1370700	1495200	1348500	1483300	0.981682	0.951921	0.978256	1.06711	0.962412
P14868	Aspartate--tRNA ligase, cytoplasmic OS=Homo sapiens OX=9606 GN=DARS1 PE=1 SV=2	DARS1	57.136	65.5	184	29	29	29	28	33	31	30	32	30	26	28	26	26	28	28	26	28	26	26	28	28	26	28	26	26	28	28	244180	318470	252460	273030	267200	253450	1017900	1018600	1032600	1110800	1013500	1064300	0.975982	0.976653	0.990076	1.06506	0.971763
P14921	Protein C-ets-1 OS=Homo sapiens OX=9606 GN=ETS1 PE=1 SV=1	ETS1	50.407	2.9	5	1	1	1	0	1	1	1	1	1	1	1	1	1	1	1	1	1	1	1	1	1	1	1	1	1	1	1	1301.8	1255.6	1290.6	573.3	1498.3	1257.8	0	0	0	0	0	0
P14923	Junction plakoglobin OS=Homo sapiens OX=9606 GN=JUP PE=1 SV=3	JUP	81.744	58.7	190	30	26	30	29	36	34	28	31	32	28	29	28	27	28	28	24	25	24	23	24	24	28	29	28	27	28	28	150560	168970	166470	171370	157450	160770	763180	821430	826820	924400	813770	853250	0.915294	0.985154	0.991619	1.10865	0.975968
P14927	Cytochrome b-c1 complex subunit 7 OS=Homo sapiens OX=9606 GN=UQCRB PE=1 SV=2	UQCRB	13.53	30.6	10	3	3	3	2	1	1	2	2	2	3	3	3	3	3	3	3	3	3	3	3	3	3	3	3	3	3	3	131020	127480	118170	124780	130200	113820	394770	352600	360760	381330	372220	351670	1.07015	0.955836	0.977956	1.03372	1.00902
P15056	Serine/threonine-protein kinase B-raf OS=Homo sapiens OX=9606 GN=BRAF PE=1 SV=4	BRAF	84.436	10.8	6	6	3	3	0	1	2	1	1	1	4	5	6	4	5	5	2	2	3	2	2	2	2	2	3	2	2	2	2016.2	1006.8	2175	1551	961.91	1102.9	38590	0	32443	32430	0	0	1.11895		0.940713	0.940336
P15104	Glutamine synthetase OS=Homo sapiens OX=9606 GN=GLUL PE=1 SV=4	GLUL	42.064	24.7	32	7	7	7	4	5	7	7	5	4	5	5	6	6	5	4	5	5	6	6	5	4	5	5	6	6	5	4	21245	14514	18093	28229	11985	9140.3	131950	84384	95385	166900	59158	57724	1.32947	0.850215	0.961056	1.68161	0.596049
P15121	Aldo-keto reductase family 1 member B1 OS=Homo sapiens OX=9606 GN=AKR1B1 PE=1 SV=3	AKR1B1	35.853	69.9	261	26	25	26	43	41	44	43	47	43	26	26	26	26	25	26	25	25	25	25	24	25	26	26	26	26	25	26	3304600	3758300	3367400	3484800	4225400	4318400	6033200	7238000	6285700	6373100	7543900	8598400	0.860405	1.03222	0.896414	0.908878	1.07585
P15144	Aminopeptidase N OS=Homo sapiens OX=9606 GN=ANPEP PE=1 SV=4	ANPEP	109.54	24.6	72	18	18	18	17	8	10	12	11	14	16	10	13	15	11	16	16	10	13	15	11	16	16	10	13	15	11	16	21772	8721.6	11205	17811	13773	22355	201480	70696	103070	171850	125740	218640	1.35604	0.475813	0.693703	1.15662	0.846282
P15151	Poliovirus receptor OS=Homo sapiens OX=9606 GN=PVR PE=1 SV=2	PVR	45.302	10.3	22	3	3	3	4	4	4	4	3	3	3	3	3	3	3	3	3	3	3	3	3	3	3	3	3	3	3	3	35878	27295	29718	28727	25804	23243	157780	115950	136180	126330	109430	107510	1.25691	0.923684	1.08484	1.00637	0.871744
P15153	Ras-related C3 botulinum toxin substrate 2 OS=Homo sapiens OX=9606 GN=RAC2 PE=1 SV=1	RAC2	21.429	39.1	20	6	3	3	3	3	3	4	3	4	4	6	4	5	5	6	2	3	2	2	2	3	2	3	2	2	2	3	219590	294120	222950	187080	228850	268160	759780	756610	782100	664350	790350	777900	1.00609	1.00189	1.03564	0.879722	1.04657
P15170	Eukaryotic peptide chain release factor GTP-binding subunit ERF3A OS=Homo sapiens OX=9606 GN=GSPT1 PE=1 SV=1	GSPT1	55.755	43.1	119	17	9	17	21	20	22	19	17	20	15	16	17	16	17	15	9	9	9	8	9	8	15	16	17	16	17	15	175720	198850	200630	190740	189080	182840	670270	664760	678940	648250	610210	669680	1.02017	1.01178	1.03337	0.986654	0.928756
P15289	Arylsulfatase A OS=Homo sapiens OX=9606 GN=ARSA PE=1 SV=3	ARSA	53.588	9.5	9	3	3	3	2	1	1	3	1	1	3	2	1	3	2	1	3	2	1	3	2	1	3	2	1	3	2	1	6311.5	2334.1	1760.1	8026.2	2370.3	1728.1	42766	21570	0	103620	26603	0	0.87924	0.443464		2.13036	0.546939
P15291	Beta-1,4-galactosyltransferase 1 OS=Homo sapiens OX=9606 GN=B4GALT1 PE=1 SV=5	B4GALT1	43.92	15.8	21	4	4	4	4	4	3	3	4	3	4	4	4	3	4	4	4	4	4	3	4	4	4	4	4	3	4	4	16603	17195	22607	16013	17863	21244	115080	111800	130590	96453	122060	126850	0.982424	0.954423	1.11483	0.823408	1.04201
P15309	Prostatic acid phosphatase OS=Homo sapiens OX=9606 GN=ACP3 PE=1 SV=3	ACP3	44.566	14.8	19	4	4	4	3	3	3	3	4	3	3	3	3	4	4	4	3	3	3	4	4	4	3	3	3	4	4	4	2407.6	6426	4708.7	14517	10351	9010.8	33496	89594	72380	69293	76526	86235	0.470093	1.25739	1.0158	0.972479	1.07399
P15311	Ezrin OS=Homo sapiens OX=9606 GN=EZR PE=1 SV=4	EZR	69.412	48	149	27	16	18	24	25	22	27	28	23	26	26	27	27	27	27	15	15	16	16	16	16	17	17	18	18	18	18	550600	606980	557850	565610	567520	496970	2791800	2845000	2774000	2818500	2678900	2554900	1.01747	1.03686	1.01099	1.02721	0.976329
P15336	Cyclic AMP-dependent transcription factor ATF-2 OS=Homo sapiens OX=9606 GN=ATF2 PE=1 SV=4	ATF2	54.537	8.3	11	3	3	3	1	2	3	1	2	2	2	2	3	2	3	3	2	2	3	2	3	3	2	2	3	2	3	3	1796.8	2557.1	2854.1	2557.8	2802.2	3373.8	23271	29700	31510	31190	30032	36468	0.766456	0.978202	1.03782	1.02728	0.989137
P15374	Ubiquitin carboxyl-terminal hydrolase isozyme L3 OS=Homo sapiens OX=9606 GN=UCHL3 PE=1 SV=1	UCHL3	26.182	53	53	8	8	8	10	9	9	10	8	7	8	6	7	7	6	6	8	6	7	7	6	6	8	6	7	7	6	6	183430	128210	146080	171340	116680	150840	542780	419230	455710	585740	422030	500350	1.11308	0.859712	0.934521	1.20117	0.865454
P15407	Fos-related antigen 1 OS=Homo sapiens OX=9606 GN=FOSL1 PE=1 SV=1	FOSL1	29.413	21	18	4	4	4	3	2	3	3	4	3	4	2	2	3	3	3	4	2	2	3	3	3	4	2	2	3	3	3	28063	14126	18129	8548.6	21760	16981	77909	62719	83347	30080	72063	61621	1.20559	0.970534	1.28974	0.465468	1.11513
P15408	Fos-related antigen 2 OS=Homo sapiens OX=9606 GN=FOSL2 PE=1 SV=1	FOSL2	35.193	12.6	14	3	3	3	2	2	3	2	3	2	3	3	3	3	3	2	3	3	3	3	3	2	3	3	3	3	3	2	12264	13030	12349	13529	14901	6601.6	72329	71957	74406	81608	87276	93034	0.902965	0.898321	0.928895	1.0188	1.08956
P15529	Membrane cofactor protein OS=Homo sapiens OX=9606 GN=CD46 PE=1 SV=3	CD46	43.747	6.4	13	2	2	2	2	3	3	1	2	2	2	2	2	2	2	2	2	2	2	2	2	2	2	2	2	2	2	2	20584	24194	21601	22859	23532	18544	265410	324920	318340	305060	353440	257830	0.872581	1.06823	1.0466	1.00294	1.16199
P15531	Nucleoside diphosphate kinase A OS=Homo sapiens OX=9606 GN=NME1 PE=1 SV=1	NME1	17.149	69.7	45	10	5	5	6	9	8	7	8	7	10	10	10	10	10	10	5	5	5	5	5	5	5	5	5	5	5	5	1013800	1082000	1070800	1057100	980010	945040	2349400	2418900	2590900	2541400	2230500	2323100	0.975246	1.0041	1.07549	1.05495	0.92589
P15559	NAD(P)H dehydrogenase [quinone] 1 OS=Homo sapiens OX=9606 GN=NQO1 PE=1 SV=1	NQO1	30.867	38.3	60	9	9	9	10	10	10	10	9	11	9	9	9	9	9	9	9	9	9	9	9	9	9	9	9	9	9	9	350140	299270	307030	389840	323200	345480	1407100	1164700	1258000	1564100	1230400	1461500	1.04413	0.864256	0.933488	1.16063	0.913008
P15586	N-acetylglucosamine-6-sulfatase OS=Homo sapiens OX=9606 GN=GNS PE=1 SV=3	GNS	62.081	29.3	45	12	12	12	9	7	4	8	8	9	11	12	10	11	12	11	11	12	10	11	12	11	11	12	10	11	12	11	72851	62014	53307	66569	55882	58572	251630	180900	215230	232800	176300	214180	1.18783	0.853946	1.016	1.09894	0.832232
P15735	Phosphorylase b kinase gamma catalytic chain, liver/testis isoform OS=Homo sapiens OX=9606 GN=PHKG2 PE=1 SV=1	PHKG2	46.442	20	31	6	6	6	5	6	5	6	4	5	6	6	6	5	5	6	6	6	6	5	5	6	6	6	6	5	5	6	11764	12018	10636	11336	9301.1	9869.1	53484	49739	48211	59577	44481	45371	1.06661	0.991927	0.961454	1.18812	0.887068
P15880	40S ribosomal protein S2 OS=Homo sapiens OX=9606 GN=RPS2 PE=1 SV=2	RPS2	31.324	45.7	85	12	12	12	15	13	15	14	13	15	11	12	12	12	12	11	11	12	12	12	12	11	11	12	12	12	12	11	825640	816760	834090	823740	831230	824410	4141200	3865400	4395900	4024800	3907500	4144300	1.01504	0.947437	1.07747	0.986507	0.957756
P15924	Desmoplakin OS=Homo sapiens OX=9606 GN=DSP PE=1 SV=3	DSP	331.77	37.9	378	87	87	87	61	67	61	62	63	64	83	82	85	82	81	83	83	82	85	82	81	83	83	82	85	82	81	83	53207	53332	52101	52603	55209	52870	353810	342220	346060	364880	356760	377980	0.991199	0.958729	0.969487	1.02221	0.999463
P15927	Replication protein A 32 kDa subunit OS=Homo sapiens OX=9606 GN=RPA2 PE=1 SV=1	RPA2	29.247	35.2	26	6	6	6	3	7	4	3	5	4	4	6	4	4	6	5	4	6	4	4	6	5	4	6	4	4	6	5	51692	69105	61907	42594	72753	61982	207740	253730	239100	205240	263810	241540	0.883273	1.07882	1.01661	0.872644	1.12167
P15941	Mucin-1 OS=Homo sapiens OX=9606 GN=MUC1 PE=1 SV=3	MUC1	122.1	69.8	66	8	8	8	11	10	11	11	12	11	7	7	8	7	8	8	7	7	8	7	8	8	7	7	8	7	8	8	20528	25899	28316	25623	33218	27895	259420	326650	336380	337330	406670	375300	0.762346	0.959912	0.988505	0.991297	1.19506
P16070	CD44 antigen OS=Homo sapiens OX=9606 GN=CD44 PE=1 SV=3	CD44	81.537	12.4	32	7	7	7	5	5	6	5	6	5	6	7	6	6	6	7	6	7	6	6	6	7	6	7	6	6	6	7	118230	124990	74121	113740	129210	133720	1389400	1399900	1330600	1281000	1554200	1682600	0.965118	0.972412	0.924274	0.88982	1.07959
P16083	Ribosyldihydronicotinamide dehydrogenase [quinone] OS=Homo sapiens OX=9606 GN=NQO2 PE=1 SV=5	NQO2	25.918	19	6	3	3	3	2	1	0	1	1	1	2	1	0	2	2	1	2	1	0	2	2	1	2	1	0	2	2	1	3304.6	417.42		3205.2	2106.6	4389.8	35920	0	0	32905	25762	0	1.13927			1.04364	0.817089
Q96QV6	Histone H2A type 1-A OS=Homo sapiens OX=9606 GN=H2AC1 PE=1 SV=3	H2AC1	14.233	29.8	12	3	0	1	2	2	2	2	2	2	3	3	3	3	3	3	0	0	0	0	0	0	1	1	1	1	1	1	145930	122550	104150	110530	115790	84413	777790	697880	591370	655020	666930	400040
P16144	Integrin beta-4 OS=Homo sapiens OX=9606 GN=ITGB4 PE=1 SV=5	ITGB4	202.16	26.4	129	35	35	35	17	21	20	23	25	23	25	31	30	29	30	29	25	31	30	29	30	29	25	31	30	29	30	29	17097	24441	19158	24246	24926	18717	213860	230090	193700	261680	250070	218960	0.937736	1.0089	0.849338	1.14742	1.09651
P16152	Carbonyl reductase [NADPH] 1 OS=Homo sapiens OX=9606 GN=CBR1 PE=1 SV=3	CBR1	30.375	67.5	81	15	13	15	14	15	14	12	13	13	15	14	15	14	15	14	13	12	13	12	13	12	15	14	15	14	15	14	499630	489280	472930	515410	525270	531030	1969600	1894200	1911000	2056800	1957600	2049200	0.998243	0.960028	0.968543	1.04244	0.992161
P16219	Short-chain specific acyl-CoA dehydrogenase, mitochondrial OS=Homo sapiens OX=9606 GN=ACADS PE=1 SV=1	ACADS	44.297	16	20	6	6	6	3	2	4	4	4	3	6	6	5	6	5	6	6	6	5	6	5	6	6	6	5	6	5	6	16316	16094	11435	18856	14039	12797	95206	88208	71028	113030	92654	71715	1.07407	0.995124	0.801307	1.27516	1.04528
P16220	Cyclic AMP-responsive element-binding protein 1 OS=Homo sapiens OX=9606 GN=CREB1 PE=1 SV=3	CREB1	35.136	11.6	6	2	1	1	1	1	1	1	1	1	1	2	2	2	2	2	1	1	1	1	1	1	1	1	1	1	1	1	10373	6797.1	8279.8	8703.7	8590.8	13599	0	0	0	0	0	0
P16278	Beta-galactosidase OS=Homo sapiens OX=9606 GN=GLB1 PE=1 SV=2	GLB1	76.074	11.8	31	6	6	6	8	6	4	5	4	4	6	5	4	6	4	5	6	5	4	6	4	5	6	5	4	6	4	5	34513	18454	16167	36883	17837	21838	256370	154010	158620	290390	164290	174300	1.28401	0.771348	0.794437	1.4544	0.822835
P16298	Serine/threonine-protein phosphatase 2B catalytic subunit beta isoform OS=Homo sapiens OX=9606 GN=PPP3CB PE=1 SV=2	PPP3CB	59.024	10.3	4	5	1	1	1	0	1	1	1	0	5	5	5	5	5	4	1	1	1	1	1	1	1	1	1	1	1	1	1251.1	6637.5	6619.1	1378.7	8118.9	7030.1	0	0	0	0	0	0
P16333	Cytoplasmic protein NCK1 OS=Homo sapiens OX=9606 GN=NCK1 PE=1 SV=1	NCK1	42.864	16.4	11	5	5	5	1	1	1	2	2	4	2	2	3	4	4	4	2	2	3	4	4	4	2	2	3	4	4	4	7576.9	9379.5	9060.1	13700	11757	11450	139040	147150	140060	153120	143290	132720	0.975286	1.03217	0.982441	1.07405	1.0051
P16383	Intron Large complex component GCFC2 OS=Homo sapiens OX=9606 GN=GCFC2 PE=1 SV=2	GCFC2	89.384	9.9	12	5	5	5	3	2	3	1	3	0	4	3	4	3	3	2	4	3	4	3	3	2	4	3	4	3	3	2	2921.6	604.31	2545.3	824.39	959.78	424.32	46938	35964	29213	42549	53900	41372	1.1268	0.863357	0.701292	1.02144	1.29393
P16401	Histone H1.5 OS=Homo sapiens OX=9606 GN=H1-5 PE=1 SV=3	H1-5	22.58	17.3	27	3	3	3	4	4	5	5	5	4	3	3	3	3	3	3	3	3	3	3	3	3	3	3	3	3	3	3	547480	471440	579330	678230	501630	553780	2555100	2156500	2788500	3493000	2246300	2835900	0.953674	0.804899	1.04079	1.30374	0.838417
P16402	Histone H1.3 OS=Homo sapiens OX=9606 GN=H1-3 PE=1 SV=2	H1-3	22.35	22.2	6	5	1	1	1	1	1	1	1	1	5	5	5	5	4	4	1	1	1	1	1	1	1	1	1	1	1	1	26570	24993	34078	36743	35546	37405	0	0	0	0	0	0
P16403	Histone H1.2 OS=Homo sapiens OX=9606 GN=H1-2 PE=1 SV=2	H1-2	21.364	23	27	5	1	5	5	4	5	5	4	4	5	5	5	5	4	4	1	1	1	1	1	1	5	5	5	5	4	4	530300	511560	591630	635790	620960	575290	3362500	3208300	3914900	4242200	3971500	3941700
P16422	Epithelial cell adhesion molecule OS=Homo sapiens OX=9606 GN=EPCAM PE=1 SV=2	EPCAM	34.932	29	50	7	7	7	8	9	10	7	8	8	6	7	7	7	6	7	6	7	7	7	6	7	6	7	7	7	6	7	258940	286850	292950	270880	258020	235090	1354700	1338700	1479000	1358700	1253900	1274400	1.00854	0.996625	1.10108	1.01151	0.933494
P16435	NADPH--cytochrome P450 reductase OS=Homo sapiens OX=9606 GN=POR PE=1 SV=2	POR	76.689	49.8	176	28	28	28	30	25	30	34	30	27	28	27	28	28	28	26	28	27	28	28	28	26	28	27	28	28	28	26	254150	219580	222750	268910	214140	193450	781100	680930	690460	817940	626510	624120	1.11029	0.967904	0.98145	1.16266	0.890549
P16455	Methylated-DNA--protein-cysteine methyltransferase OS=Homo sapiens OX=9606 GN=MGMT PE=1 SV=1	MGMT	21.646	36.2	16	5	5	5	4	3	3	3	1	2	4	3	4	3	2	3	4	3	4	3	2	3	4	3	4	3	2	3	18881	21503	23955	18741	16808	20948	89445	84694	89254	81178	82872	90783	1.03559	0.980584	1.03338	0.939876	0.959489
P16615	Sarcoplasmic/endoplasmic reticulum calcium ATPase 2 OS=Homo sapiens OX=9606 GN=ATP2A2 PE=1 SV=1	ATP2A2	114.76	43.6	198	34	34	34	34	38	31	31	33	31	32	33	32	33	34	32	32	33	32	33	34	32	32	33	32	33	34	32	247640	246070	228420	236350	236980	237190	1092900	1102500	1110500	1163000	1096500	1116100	0.981426	0.990047	0.997231	1.04438	0.984659
P16930	Fumarylacetoacetase OS=Homo sapiens OX=9606 GN=FAH PE=1 SV=2	FAH	46.374	30.8	36	10	10	10	7	6	8	5	6	4	8	8	9	8	9	8	8	8	9	8	9	8	8	8	9	8	9	8	35752	30555	34424	35050	33371	26551	335800	279360	307660	333710	283710	312440	1.08751	0.904722	0.996373	1.08074	0.91881
P16949	Stathmin OS=Homo sapiens OX=9606 GN=STMN1 PE=1 SV=3	STMN1	17.302	30.9	20	4	3	4	3	4	3	3	4	3	3	4	4	3	4	4	2	3	3	2	3	3	3	4	4	3	4	4	152140	142250	161240	150630	145900	178470	625580	534350	652160	640490	530440	754520	1.00426	0.85781	1.04693	1.0282	0.851533
P16989	Y-box-binding protein 3 OS=Homo sapiens OX=9606 GN=YBX3 PE=1 SV=4	YBX3	40.089	51.1	50	12	9	9	7	10	9	7	9	8	11	12	12	10	11	11	8	9	9	7	8	8	8	9	9	7	8	8	127770	200610	173930	111990	205960	176300	487710	749740	707260	509920	773960	744060	0.736602	1.13235	1.06819	0.770146	1.16893
P17026	Zinc finger protein 22 OS=Homo sapiens OX=9606 GN=ZNF22 PE=1 SV=3	ZNF22	25.915	12.5	3	2	2	2	2	0	0	0	0	1	2	1	1	1	0	1	2	1	1	1	0	1	2	1	1	1	0	1	941.19	637.15	286.13	830.3		771.09	0	0	0	0	0	0
P17028	Zinc finger protein 24 OS=Homo sapiens OX=9606 GN=ZNF24 PE=1 SV=4	ZNF24	42.155	8.2	5	2	2	2	0	0	1	0	2	2	0	0	1	1	2	2	0	0	1	1	2	2	0	0	1	1	2	2			502.15	89.223	1334.7	883.56	0	0	0	0	13774	9825.3					1.16732
P17029	Zinc finger protein with KRAB and SCAN domains 1 OS=Homo sapiens OX=9606 GN=ZKSCAN1 PE=1 SV=3	ZKSCAN1	63.629	13.7	11	5	5	5	2	1	2	3	1	2	4	4	5	4	3	4	4	4	5	4	3	4	4	4	5	4	3	4	2903.9	2560.7	2968	2952.4	2184.8	2423.8	50069	23250	26343	78200	22134	30336	1.30427	0.605648	0.686218	2.03706	0.576576
P17050	Alpha-N-acetylgalactosaminidase OS=Homo sapiens OX=9606 GN=NAGA PE=1 SV=2	NAGA	46.564	15.6	16	5	5	5	2	2	3	4	2	3	3	3	4	4	4	4	3	3	4	4	4	4	3	3	4	4	4	4	9670.7	8876.2	11947	12226	12831	12878	78133	69124	69559	98463	85109	68595	0.999606	0.884348	0.889913	1.2597	1.08885
P17066	Heat shock 70 kDa protein 6 OS=Homo sapiens OX=9606 GN=HSPA6 PE=1 SV=2	HSPA6	71.027	14	17	8	1	1	3	4	2	3	3	2	8	8	8	8	8	8	1	1	1	1	1	1	1	1	1	1	1	1	96124	123530	113330	93305	117540	123460	0	0	0	0	0	0
P17096	High mobility group protein HMG-I/HMG-Y OS=Homo sapiens OX=9606 GN=HMGA1 PE=1 SV=3	HMGA1	11.676	15	7	1	1	1	1	1	1	2	1	1	1	1	1	1	1	1	1	1	1	1	1	1	1	1	1	1	1	1	39626	24757	20716	36368	19249	19698	165080	0	116020	204890	107450	0
P17152	Transmembrane protein 11, mitochondrial OS=Homo sapiens OX=9606 GN=TMEM11 PE=1 SV=1	TMEM11	21.541	12.5	16	2	2	2	3	4	1	3	2	3	2	2	2	2	2	2	2	2	2	2	2	2	2	2	2	2	2	2	26149	20823	17943	25798	21547	17589	64663	50511	48941	64682	55229	52450	1.15306	0.900706	0.87271	1.1534	0.984837
P17174	Aspartate aminotransferase, cytoplasmic OS=Homo sapiens OX=9606 GN=GOT1 PE=1 SV=3	GOT1	46.247	57.1	109	16	16	16	15	17	18	21	20	18	15	15	15	16	15	15	15	15	15	16	15	15	15	15	15	16	15	15	362360	350560	333850	423450	295110	285510	1358700	1284900	1328000	1518200	1124500	1163200	1.04818	0.991244	1.02449	1.17122	0.867502
P17252	Protein kinase C alpha type OS=Homo sapiens OX=9606 GN=PRKCA PE=1 SV=4	PRKCA	76.749	35.4	59	15	14	15	11	9	8	13	9	9	13	12	11	13	12	11	13	12	11	13	11	11	13	12	11	13	12	11	19770	16255	16082	26810	22480	16765	133830	110880	117290	168340	103200	124690	1.05902	0.877412	0.928135	1.3321	0.816639
P17275	Transcription factor jun-B OS=Homo sapiens OX=9606 GN=JUNB PE=1 SV=1	JUNB	35.879	30.5	22	6	6	6	4	4	2	4	4	4	6	5	4	5	4	5	6	5	4	5	4	5	6	5	4	5	4	5	26180	25159	24323	18812	27031	26036	119500	109470	119400	83422	116250	121550	1.0708	0.980926	1.06991	0.747518	1.04168
P17301	Integrin alpha-2 OS=Homo sapiens OX=9606 GN=ITGA2 PE=1 SV=1	ITGA2	129.29	31.7	141	25	25	25	26	23	24	22	23	23	25	23	24	23	23	22	25	23	24	23	23	22	25	23	24	23	23	22	76742	72965	62656	60346	75076	65056	364100	357130	331550	261610	350710	336230	1.09157	1.07068	0.993989	0.784308	1.05143
P17302	Gap junction alpha-1 protein OS=Homo sapiens OX=9606 GN=GJA1 PE=1 SV=2	GJA1	43.008	17	11	4	4	4	1	2	1	1	3	3	2	3	3	2	4	3	2	3	3	2	4	3	2	3	3	2	4	3	4575.8	8875.2	8958.3	6374.7	13113	10457	63373	92200	95561	77535	145690	149790	0.60921	0.886327	0.918636	0.745351	1.40053
P17405	Sphingomyelin phosphodiesterase OS=Homo sapiens OX=9606 GN=SMPD1 PE=1 SV=5	SMPD1	69.935	1.9	3	1	1	1	1	1	0	1	0	0	1	1	0	1	0	0	1	1	0	1	0	0	1	1	0	1	0	0	1730.7	835.75		1429.1			0	0	0	0	0	0
P17480	Nucleolar transcription factor 1 OS=Homo sapiens OX=9606 GN=UBTF PE=1 SV=1	UBTF	89.405	15.6	52	9	9	9	8	8	10	7	9	10	9	8	9	8	9	9	9	8	9	8	9	9	9	8	9	8	9	9	16586	21075	21860	19238	25273	22345	128480	158250	173840	136990	177080	187170	0.801489	0.987201	1.08445	0.854576	1.10467
P17535	Transcription factor jun-D OS=Homo sapiens OX=9606 GN=JUND PE=1 SV=3	JUND	35.173	4.3	5	1	1	1	1	0	1	1	1	1	1	1	1	1	1	1	1	1	1	1	1	1	1	1	1	1	1	1	2399.6	1938.9	2261.9	2352.9	1983.6	1917.3	0	0	0	0	0	0
P17568	NADH dehydrogenase [ubiquinone] 1 beta subcomplex subunit 7 OS=Homo sapiens OX=9606 GN=NDUFB7 PE=1 SV=4	NDUFB7	16.402	18.2	10	2	2	2	2	1	2	1	2	2	2	1	2	2	2	2	2	1	2	2	2	2	2	1	2	2	2	2	46635	23374	34978	38885	37659	44677	190590	0	144480	159790	147470	197690	1.13444		0.85998	0.951108	0.877777
P17612	cAMP-dependent protein kinase catalytic subunit alpha OS=Homo sapiens OX=9606 GN=PRKACA PE=1 SV=2	PRKACA	40.589	39	55	11	4	11	8	11	10	9	9	8	10	10	10	10	10	9	4	4	4	4	4	4	10	10	10	10	10	9	75975	360470	303480	308080	344910	330280	3827800	3663500	3659100	4400700	3630900	3795700	0.999526	0.956623	0.955474	1.14912	0.948111
P17655	Calpain-2 catalytic subunit OS=Homo sapiens OX=9606 GN=CAPN2 PE=1 SV=6	CAPN2	79.994	48.9	162	25	25	25	27	27	25	28	29	26	25	25	24	25	23	23	25	25	24	25	23	23	25	25	24	25	23	23	249980	242950	241930	249260	215700	223720	1664700	1559000	1632200	1611400	1411700	1478000	1.06746	0.999679	1.04662	1.03328	0.905226
P17693	HLA class I histocompatibility antigen, alpha chain G OS=Homo sapiens OX=9606 GN=HLA-G PE=1 SV=1	HLA-G	38.224	6.8	5	2	1	1	1	0	1	0	1	2	2	2	2	1	1	2	1	1	1	1	1	1	1	1	1	1	1	1	7618.3	4127.7	11765	6227.4	13110	17650	0	0	0	0	0	0
P17706	Tyrosine-protein phosphatase non-receptor type 2 OS=Homo sapiens OX=9606 GN=PTPN2 PE=1 SV=2	PTPN2	48.473	5.3	6	1	1	1	1	1	1	1	1	1	1	1	1	1	1	1	1	1	1	1	1	1	1	1	1	1	1	1	1880.2	1649.1	1962.9	1781.9	1796.7	1980.9	0	0	0	0	0	0
P17707	S-adenosylmethionine decarboxylase proenzyme OS=Homo sapiens OX=9606 GN=AMD1 PE=1 SV=2	AMD1	38.339	3.6	1	1	1	1	0	0	1	0	0	0	1	1	1	0	1	1	1	1	1	0	1	1	1	1	1	0	1	1	640.1	1408.3	880.62		1448.4	1007.4	0	0	0	0	0	0
P17812	CTP synthase 1 OS=Homo sapiens OX=9606 GN=CTPS1 PE=1 SV=2	CTPS1	66.69	52.3	152	23	21	23	26	29	24	27	24	22	22	20	22	21	22	20	20	18	20	19	20	18	22	20	22	21	22	20	112530	128540	121200	114340	121960	107600	394870	436490	440490	398550	428840	401090	0.947563	1.04744	1.05704	0.956394	1.02908
P17813	Endoglin OS=Homo sapiens OX=9606 GN=ENG PE=1 SV=2	ENG	70.577	20.1	28	8	8	8	4	6	4	3	6	5	5	8	5	4	6	6	5	8	5	4	6	6	5	8	5	4	6	6	20858	35507	25666	15496	32949	27192	152220	196250	211030	117290	190800	217380	0.841793	1.08528	1.16702	0.648626	1.05514
P17844	Probable ATP-dependent RNA helicase DDX5 OS=Homo sapiens OX=9606 GN=DDX5 PE=1 SV=1	DDX5	69.147	46.9	102	27	19	19	14	19	18	14	18	19	23	26	26	23	25	26	15	18	18	15	17	18	15	18	18	15	17	18	118250	287960	268380	141740	266340	248270	912240	1708200	1695400	877720	1593100	1604100	0.652318	1.22149	1.21233	0.627633	1.13918
P17858	ATP-dependent 6-phosphofructokinase, liver type OS=Homo sapiens OX=9606 GN=PFKL PE=1 SV=6	PFKL	85.018	45.8	113	23	19	19	18	19	17	23	19	17	19	21	19	22	22	19	15	17	15	18	18	15	15	17	15	18	18	15	79773	82605	57060	105580	96755	71015	304440	307940	276510	377510	345810	335600	0.937792	0.948573	0.851757	1.16288	1.06523
P17900	Ganglioside GM2 activator OS=Homo sapiens OX=9606 GN=GM2A PE=1 SV=4	GM2A	20.838	10.4	6	1	1	1	1	1	1	1	1	1	1	1	1	1	1	1	1	1	1	1	1	1	1	1	1	1	1	1	3744.4	5631.9	2559.5	2340.4	5537.8	2593.2	0	0	0	0	0	0
P17931	Galectin-3 OS=Homo sapiens OX=9606 GN=LGALS3 PE=1 SV=5	LGALS3	26.152	31.2	61	9	9	9	10	9	10	12	10	10	8	8	8	9	8	8	8	8	8	9	8	8	8	8	8	9	8	8	665690	714170	636800	781920	695800	620440	1484700	1527300	1442600	1777400	1506400	1502300	0.964018	0.991678	0.936682	1.15407	0.978108
P17936	Insulin-like growth factor-binding protein 3 OS=Homo sapiens OX=9606 GN=IGFBP3 PE=1 SV=2	IGFBP3	31.674	5.8	2	1	1	1	0	0	0	0	1	1	0	0	0	0	1	1	0	0	0	0	1	1	0	0	0	0	1	1					1199.5	1094.8	0	0	0	0	0	0
P17980	26S proteasome regulatory subunit 6A OS=Homo sapiens OX=9606 GN=PSMC3 PE=1 SV=3	PSMC3	49.203	61.5	106	20	19	20	20	17	17	16	18	18	17	18	18	15	18	19	17	18	18	15	18	19	17	18	18	15	18	19	201070	211720	196890	180060	216480	202980	672170	702570	685450	693240	701830	693670	0.972063	1.01603	0.991268	1.00253	1.01496
P17987	T-complex protein 1 subunit alpha OS=Homo sapiens OX=9606 GN=TCP1 PE=1 SV=1	TCP1	60.343	49.5	137	22	22	22	21	25	25	22	23	21	22	22	21	20	20	19	22	22	21	20	20	19	22	22	21	20	20	19	332160	314620	316490	317840	309400	292900	936420	862100	948900	941980	903500	947370	1.01412	0.933637	1.02764	1.02015	0.978472
P18031	Tyrosine-protein phosphatase non-receptor type 1 OS=Homo sapiens OX=9606 GN=PTPN1 PE=1 SV=1	PTPN1	49.966	58.9	101	19	19	19	19	19	18	14	16	15	16	19	17	15	17	18	16	19	17	15	17	18	16	19	17	15	17	18	103580	125770	111800	87952	100580	104510	410080	437830	433930	383090	412820	407600	0.989993	1.05699	1.04757	0.924836	0.996608
P18074	General transcription and DNA repair factor IIH helicase subunit XPD OS=Homo sapiens OX=9606 GN=ERCC2 PE=1 SV=1	ERCC2	86.908	8.2	8	4	4	4	2	1	1	1	3	0	3	2	2	3	3	0	3	2	2	3	3	0	3	2	2	3	3	0	1918.7	1116.6	495.5	1791.9	1382.3		36771	31851	30577	42079	24846	0	1.10673	0.958651	0.920307	1.26649	0.747815
P18077	60S ribosomal protein L35a OS=Homo sapiens OX=9606 GN=RPL35A PE=1 SV=2	RPL35A	12.538	12.7	5	2	2	2	1	0	1	0	1	2	2	2	2	1	2	2	2	2	2	1	2	2	2	2	2	1	2	2	111530	97518	105370	46830	97836	110580	379190	353450	387040	367430	349350	390480	1.02164	0.952293	1.04279	0.989959	0.941247
P18084	Integrin beta-5 OS=Homo sapiens OX=9606 GN=ITGB5 PE=1 SV=1	ITGB5	88.053	8	12	5	5	5	3	1	1	4	3	0	4	1	2	4	4	3	4	1	2	4	4	3	4	1	2	4	4	3	1072.1	180.9	370.67	1071.9	740.86	712.89	17089	0	10685	14591	11976	12002	1.28793		0.805285	1.09966	0.902582
P18085	ADP-ribosylation factor 4 OS=Homo sapiens OX=9606 GN=ARF4 PE=1 SV=3	ARF4	20.511	64.4	102	10	6	10	16	15	16	17	20	18	10	10	10	10	10	10	6	6	6	6	6	6	10	10	10	10	10	10	1126400	1142900	1114000	1069900	1151100	1078400	2998100	2919300	2929700	2842800	2819000	2891300	1.03382	1.00664	1.01023	0.980265	0.972058
P18124	60S ribosomal protein L7 OS=Homo sapiens OX=9606 GN=RPL7 PE=1 SV=1	RPL7	29.225	43.5	72	12	12	12	13	10	13	12	11	13	12	12	12	11	12	12	12	12	12	11	12	12	12	12	12	11	12	12	436990	396430	423130	420910	391550	417060	2581600	2020400	2352700	2680400	2294700	2455300	1.07678	0.842705	0.981307	1.11799	0.957115
P18206	Vinculin OS=Homo sapiens OX=9606 GN=VCL PE=1 SV=4	VCL	123.8	50.4	220	43	43	43	38	33	38	32	40	39	39	40	40	38	41	41	39	40	40	38	41	41	39	40	40	38	41	41	235770	252990	246860	207530	235990	233420	1163000	1147100	1210200	1072000	1091600	1165700	1.01875	1.00482	1.06009	0.939033	0.956202
P18433	Receptor-type tyrosine-protein phosphatase alpha OS=Homo sapiens OX=9606 GN=PTPRA PE=1 SV=3	PTPRA	90.718	7.1	17	4	4	4	2	3	3	2	3	4	2	4	3	2	3	4	2	4	3	2	3	4	2	4	3	2	3	4	1060.2	4669.3	2892.5	1480.3	3378.4	4576.3	55044	56096	51833	78212	63025	68733	0.885562	0.902486	0.833902	1.25829	1.01396
P18440	Arylamine N-acetyltransferase 1 OS=Homo sapiens OX=9606 GN=NAT1 PE=1 SV=2	NAT1	33.898	10	16	2	2	2	3	3	2	3	2	3	2	2	2	2	2	2	2	2	2	2	2	2	2	2	2	2	2	2	2947.2	4918.3	2712.8	3140	3202.8	2216.9	29251	44124	25292	28874	31424	22514	0.967087	1.45881	0.836196	0.954623	1.03893
P18564	Integrin beta-6 OS=Homo sapiens OX=9606 GN=ITGB6 PE=1 SV=2	ITGB6	85.935	19.2	41	10	10	10	4	8	7	7	7	8	9	9	9	10	8	9	9	9	9	10	8	9	9	9	9	10	8	9	11001	12496	10762	12557	11640	14150	136460	237240	187910	207810	224960	255410	0.655118	1.13894	0.90212	0.997656	1.07999
P18583	Protein SON OS=Homo sapiens OX=9606 GN=SON PE=1 SV=4	SON	263.83	10.4	43	15	15	15	6	6	9	8	7	7	12	12	12	14	14	13	12	12	12	14	14	13	12	12	12	14	14	13	4868.7	4817.9	5147.9	6789.2	6371	6876.9	64352	62825	71099	69367	70788	82136	0.918075	0.89629	1.01433	0.989621	1.00989
P18615	Negative elongation factor E OS=Homo sapiens OX=9606 GN=NELFE PE=1 SV=3	NELFE	43.239	34.5	35	9	9	9	5	5	8	4	6	7	8	8	9	7	8	8	8	8	9	7	8	8	8	8	9	7	8	8	24525	22190	25776	20941	22774	24728	156410	123720	161950	142990	136100	171720	1.05104	0.831368	1.08826	0.960857	0.914558
P18621	60S ribosomal protein L17 OS=Homo sapiens OX=9606 GN=RPL17 PE=1 SV=3	RPL17	21.397	41.3	65	7	7	7	12	11	10	12	12	8	7	7	6	7	7	6	7	7	6	7	7	6	7	7	6	7	7	6	1195200	1136000	992110	1112600	1277100	971660	2926000	2729700	2783800	3027200	2812100	2738000	1.03169	0.962472	0.981548	1.06737	0.991526
P18669	Phosphoglycerate mutase 1 OS=Homo sapiens OX=9606 GN=PGAM1 PE=1 SV=2	PGAM1	28.804	65.4	136	14	14	14	21	24	20	20	29	22	13	14	14	13	14	13	13	14	14	13	14	13	13	14	14	13	14	13	2180600	2748400	2536700	2399300	2726900	2540100	6947700	8531400	8014600	7908600	8313700	7932900	0.874862	1.07428	1.00921	0.995859	1.04687
P18754	Regulator of chromosome condensation OS=Homo sapiens OX=9606 GN=RCC1 PE=1 SV=1	RCC1	44.969	57.7	107	15	15	15	17	18	18	19	18	17	15	15	15	15	15	15	15	15	15	15	15	15	15	15	15	15	15	15	336810	310000	293950	358130	305460	268560	725720	697110	667420	777690	692080	631860	1.03875	0.997801	0.955304	1.11314	0.990601
P18827	Syndecan-1 OS=Homo sapiens OX=9606 GN=SDC1 PE=1 SV=3	SDC1	32.461	10.3	12	3	3	3	3	1	2	2	3	1	2	3	3	3	3	3	2	3	3	3	3	3	2	3	3	3	3	3	14850	39374	47828	46676	50889	54225	113930	160850	218350	137310	177680	221920	0.663644	0.936954	1.27189	0.799833	1.03499
P18846	Cyclic AMP-dependent transcription factor ATF-1 OS=Homo sapiens OX=9606 GN=ATF1 PE=1 SV=2	ATF1	29.232	12.9	9	2	1	2	1	2	1	2	1	2	1	2	2	2	2	2	1	1	1	1	1	1	1	2	2	2	2	2	11545	20541	20595	16480	21471	18608	0	70640	75871	53698	74109	69593
P18858	DNA ligase 1 OS=Homo sapiens OX=9606 GN=LIG1 PE=1 SV=1	LIG1	101.73	17.4	29	11	11	11	1	8	6	1	7	6	2	10	9	2	10	10	2	10	9	2	10	10	2	10	9	2	10	10	381.3	5489.4	5113.7	423.4	5507.8	4033.1	7403.7	99236	65657	14035	70364	62015	0.139381	1.8682	1.23605	0.264221	1.32466
P18859	ATP synthase-coupling factor 6, mitochondrial OS=Homo sapiens OX=9606 GN=ATP5PF PE=1 SV=1	ATP5PF	12.587	39.8	12	3	3	3	1	3	2	2	2	2	2	3	2	3	3	2	2	3	2	3	3	2	2	3	2	3	3	2	144160	177000	121760	190450	198420	124210	506750	433220	427520	527130	465540	465880	1.07589	0.919775	0.907673	1.11916	0.988394
P18887	DNA repair protein XRCC1 OS=Homo sapiens OX=9606 GN=XRCC1 PE=1 SV=2	XRCC1	69.476	24	53	10	10	10	10	9	9	9	8	8	10	9	9	9	9	9	10	9	9	9	9	9	10	9	9	9	9	9	22043	20994	20148	23395	17577	18725	124420	119110	120570	135740	103590	122250	1.02872	0.984814	0.996886	1.12231	0.856493
P19174	1-phosphatidylinositol 4,5-bisphosphate phosphodiesterase gamma-1 OS=Homo sapiens OX=9606 GN=PLCG1 PE=1 SV=1	PLCG1	148.53	12.6	36	13	13	13	4	5	4	6	7	10	9	11	9	10	11	11	9	11	9	10	11	11	9	11	9	10	11	11	3163.5	4259.5	3364.2	3578.2	4579.4	4732.1	53952	58169	56838	56612	61899	71373	0.902099	0.972609	0.950354	0.946576	1.03498
P19256	Lymphocyte function-associated antigen 3 OS=Homo sapiens OX=9606 GN=CD58 PE=1 SV=1	CD58	28.147	7.2	6	2	2	2	1	1	1	1	0	2	1	2	1	1	2	2	1	2	1	1	2	2	1	2	1	1	2	2	6933.7	9331	6713.9	8346.3	8939.1	10396	0	51898	0	0	47261	63882		0.954938			0.869616
P19338	Nucleolin OS=Homo sapiens OX=9606 GN=NCL PE=1 SV=3	NCL	76.613	28.9	148	21	21	21	23	25	26	22	27	25	21	19	21	20	21	21	21	19	21	20	21	21	21	19	21	20	21	21	559440	538470	553990	501660	554780	488600	4024100	3882500	3993500	3842700	3840500	3759100	1.03437	0.997969	1.0265	0.987739	0.987174
P19367	Hexokinase-1 OS=Homo sapiens OX=9606 GN=HK1 PE=1 SV=3	HK1	102.48	41.1	188	29	23	29	31	32	31	32	30	32	29	29	29	29	29	29	23	23	23	23	23	23	29	29	29	29	29	29	160570	158020	147030	153470	146970	147370	602290	550500	547290	572050	524830	546780	1.08075	0.987816	0.982056	1.02649	0.941754
P19387	DNA-directed RNA polymerase II subunit RPB3 OS=Homo sapiens OX=9606 GN=POLR2C PE=1 SV=2	POLR2C	31.441	36	13	6	6	6	2	3	2	1	1	4	4	5	5	3	5	5	4	5	5	3	5	5	4	5	5	3	5	5	21099	25398	27767	10786	25422	28466	112710	135100	135180	121100	141410	117310	0.886538	1.06265	1.06328	0.952531	1.11228
P19388	DNA-directed RNA polymerases I, II, and III subunit RPABC1 OS=Homo sapiens OX=9606 GN=POLR2E PE=1 SV=4	POLR2E	24.551	28.1	19	5	5	5	4	4	3	3	3	2	4	5	4	4	4	4	4	5	4	4	4	4	4	5	4	4	4	4	42402	48052	48888	38852	49388	49906	209870	221080	231570	195970	222920	241610	0.951777	1.00262	1.05019	0.888739	1.01096
P19404	NADH dehydrogenase [ubiquinone] flavoprotein 2, mitochondrial OS=Homo sapiens OX=9606 GN=NDUFV2 PE=1 SV=2	NDUFV2	27.391	33.7	33	6	6	6	6	4	6	6	6	5	6	5	5	6	6	5	6	5	5	6	6	5	6	5	5	6	6	5	115800	75864	81869	109630	109950	78079	510790	444520	437150	480470	448640	417550	1.11888	0.973714	0.95757	1.05246	0.982739
P19440	Glutathione hydrolase 1 proenzyme OS=Homo sapiens OX=9606 GN=GGT1 PE=1 SV=2	GGT1	61.409	9.1	15	4	4	4	2	4	3	2	3	1	2	4	3	3	4	3	2	4	3	3	4	3	2	4	3	3	4	3	5178.5	9380.8	6954.6	6348.3	9500.5	7448.3	103190	87098	75573	110470	89346	86202	1.12188	0.946925	0.821626	1.20102	0.971365
P19447	General transcription and DNA repair factor IIH helicase subunit XPB OS=Homo sapiens OX=9606 GN=ERCC3 PE=1 SV=1	ERCC3	89.277	6.1	17	3	3	3	3	3	3	3	3	2	3	3	3	3	3	2	3	3	3	3	3	2	3	3	3	3	3	2	2191.1	2224.6	1742.2	2163.4	2099	1399	59782	59789	48018	63607	58055	48325	1.06255	1.06268	0.853461	1.13054	1.03186
P19474	E3 ubiquitin-protein ligase TRIM21 OS=Homo sapiens OX=9606 GN=TRIM21 PE=1 SV=1	TRIM21	54.169	20.4	29	9	9	9	1	9	4	5	6	4	5	9	6	6	9	5	5	9	6	6	9	5	5	9	6	6	9	5	8951.1	21284	9882.3	10108	24002	13730	79341	132000	91339	96247	157840	122390	0.700937	1.16615	0.806933	0.850292	1.39444
P19525	Interferon-induced, double-stranded RNA-activated protein kinase OS=Homo sapiens OX=9606 GN=EIF2AK2 PE=1 SV=2	EIF2AK2	62.094	35.8	79	14	13	14	13	15	14	12	14	11	12	13	13	11	13	12	12	13	13	11	13	12	12	13	13	11	13	12	113930	184440	122440	111340	201060	132660	342630	540930	376110	379110	599010	440310	0.767626	1.2119	0.842635	0.849356	1.34202
P19623	Spermidine synthase OS=Homo sapiens OX=9606 GN=SRM PE=1 SV=1	SRM	33.824	57.3	71	11	11	11	12	11	11	14	12	11	11	11	11	11	11	11	11	11	11	11	11	11	11	11	11	11	11	11	186590	177520	155290	174510	176190	161480	434220	409190	448670	415680	407200	402270	1.035	0.975334	1.06944	0.990803	0.970591
P19634	Sodium/hydrogen exchanger 1 OS=Homo sapiens OX=9606 GN=SLC9A1 PE=1 SV=2	SLC9A1	90.762	3.6	11	2	2	2	2	1	2	2	2	2	2	2	2	2	2	2	2	2	2	2	2	2	2	2	2	2	2	2	3008.2	3259.8	2405.6	3893.2	3314	2700.2	44313	47273	37485	58710	48180	43417	0.951678	1.01525	0.805038	1.26087	1.03473
P19784	Casein kinase II subunit alpha' OS=Homo sapiens OX=9606 GN=CSNK2A2 PE=1 SV=1	CSNK2A2	41.213	59.4	95	16	16	16	15	17	17	16	15	15	16	16	16	16	14	16	16	16	16	16	14	16	16	16	16	16	14	16	114780	106330	110630	108320	100410	108770	263850	239780	254480	254710	240890	249790	1.05294	0.956887	1.01555	1.01647	0.961317
P19793	Retinoic acid receptor RXR-alpha OS=Homo sapiens OX=9606 GN=RXRA PE=1 SV=1	RXRA	50.811	10	7	3	2	3	0	1	1	2	1	2	1	2	1	2	2	2	0	1	1	1	1	2	1	2	1	2	2	2	537.32	1689.3	718.94	1498.9	1956.8	901.38	0	21378	0	18878	23062	0		1.01289		0.894438	1.09268
P19838	Nuclear factor NF-kappa-B p105 subunit OS=Homo sapiens OX=9606 GN=NFKB1 PE=1 SV=2	NFKB1	105.35	15.5	45	10	10	10	8	7	6	7	7	10	10	9	9	10	10	10	10	9	9	10	10	10	10	9	9	10	10	10	13490	12513	12028	13833	13209	12847	132520	126490	129050	135540	127180	134480	1.01256	0.966482	0.986043	1.03563	0.971755
P19971	Thymidine phosphorylase OS=Homo sapiens OX=9606 GN=TYMP PE=1 SV=2	TYMP	49.955	47.7	77	15	15	15	12	13	11	12	19	10	13	14	12	10	15	12	13	14	12	10	15	12	13	14	12	10	15	12	91317	159220	73362	99234	220160	101170	654610	935290	509940	804880	1183400	726360	0.815801	1.1656	0.635508	1.00307	1.4748
P20020	Plasma membrane calcium-transporting ATPase 1 OS=Homo sapiens OX=9606 GN=ATP2B1 PE=1 SV=4	ATP2B1	134.68	23.4	96	20	13	20	17	14	12	19	15	19	17	19	16	19	18	17	11	12	10	12	12	12	17	19	16	19	18	17	54215	40041	39219	49404	44809	43076	408370	280340	303220	390390	317100	362910	1.18808	0.815602	0.882167	1.13577	0.922549
P20042	Eukaryotic translation initiation factor 2 subunit 2 OS=Homo sapiens OX=9606 GN=EIF2S2 PE=1 SV=2	EIF2S2	38.388	54.4	107	20	20	20	19	18	20	18	18	14	18	18	20	19	18	16	18	18	20	19	18	16	18	18	20	19	18	16	324180	294380	323350	324880	271630	257850	961310	804230	882550	948270	793130	830930	1.10486	0.924328	1.01434	1.08988	0.91157
P20061	Transcobalamin-1 OS=Homo sapiens OX=9606 GN=TCN1 PE=1 SV=2	TCN1	48.206	3.5	4	1	1	1	0	1	1	0	1	1	0	1	1	0	1	1	0	1	1	0	1	1	0	1	1	0	1	1		3269.5	1251		1785.8	1727	0	0	0	0	0	0
P20073	Annexin A7 OS=Homo sapiens OX=9606 GN=ANXA7 PE=1 SV=3	ANXA7	52.739	24.2	75	12	12	12	13	13	12	13	14	10	11	11	11	12	11	10	11	11	11	12	11	10	11	11	11	12	11	10	239740	204820	211210	230900	195780	178570	1228600	986030	1093100	1201400	960800	1002000	1.13901	0.914129	1.01339	1.11379	0.890739
P20290	Transcription factor BTF3 OS=Homo sapiens OX=9606 GN=BTF3 PE=1 SV=1	BTF3	22.168	59.7	37	8	8	8	6	6	6	6	8	5	6	6	7	6	7	6	6	6	7	6	7	6	6	6	7	6	7	6	154050	185610	177110	129350	198400	149030	521030	588480	586240	416310	612550	566150	0.949987	1.07297	1.06888	0.759053	1.11685
P20336	Ras-related protein Rab-3A OS=Homo sapiens OX=9606 GN=RAB3A PE=1 SV=1	RAB3A	24.984	19.1	4	3	1	1	0	1	1	0	1	1	3	3	3	3	3	3	1	1	1	1	1	1	1	1	1	1	1	1	16767	16581	14149	19622	17810	16527	0	0	0	0	0	0
P20338	Ras-related protein Rab-4A OS=Homo sapiens OX=9606 GN=RAB4A PE=1 SV=3	RAB4A	24.389	36.2	28	6	6	6	5	5	5	6	3	4	5	5	4	6	3	4	5	5	4	6	3	4	5	5	4	6	3	4	47396	43992	30952	43017	33071	39901	272930	214640	254370	297190	224710	273200	1.06541	0.83787	0.99296	1.16011	0.87718
P20339	Ras-related protein Rab-5A OS=Homo sapiens OX=9606 GN=RAB5A PE=1 SV=2	RAB5A	23.658	48.8	15	7	4	4	2	3	2	2	3	3	6	5	6	6	5	7	3	3	3	3	3	4	3	3	3	3	3	4	53927	55542	50244	54735	54687	53729	267710	261190	221460	267380	256850	267740	1.04145	1.01609	0.861528	1.04017	0.999203
P20340	Ras-related protein Rab-6A OS=Homo sapiens OX=9606 GN=RAB6A PE=1 SV=3	RAB6A	23.593	37	41	7	2	7	8	8	7	6	6	6	7	7	7	7	6	7	2	2	2	2	1	2	7	7	7	7	6	7	406710	372910	406340	382120	351480	376670	2737600	2137900	2429100	2622500	2213800	2411200	1.12874	0.881481	1.00155	1.08129	0.912775
P20585	DNA mismatch repair protein Msh3 OS=Homo sapiens OX=9606 GN=MSH3 PE=1 SV=4	MSH3	127.41	7.7	17	6	6	6	5	2	1	4	2	3	5	6	5	5	5	5	5	6	5	5	5	5	5	6	5	5	5	5	2761.3	2420.9	1881.8	2370.2	1480.6	1876.9	52923	50181	49325	60307	49249	44894	1.03473	0.981123	0.964387	1.1791	0.962901
P20591	Interferon-induced GTP-binding protein Mx1 OS=Homo sapiens OX=9606 GN=MX1 PE=1 SV=4	MX1	75.519	54.1	118	25	22	25	7	25	18	11	32	25	9	23	20	16	24	21	7	20	17	13	21	18	9	23	20	16	24	21	6681.4	241530	66028	32713	390240	151010	33616	701960	186330	126280	1195100	479820	0.074068	1.54668	0.410553	0.278241	2.63324
P20592	Interferon-induced GTP-binding protein Mx2 OS=Homo sapiens OX=9606 GN=MX2 PE=1 SV=1	MX2	82.088	13.4	4	7	4	4	0	0	0	0	4	0	3	5	3	3	7	4	1	2	0	0	4	1	1	2	0	0	4	1	607.98	1777.9			5554.1	368.21	0	45081	0	0	85016	0		0.693037			1.30696
P20618	Proteasome subunit beta type-1 OS=Homo sapiens OX=9606 GN=PSMB1 PE=1 SV=2	PSMB1	26.489	49	50	8	8	8	8	8	10	8	8	8	7	7	8	7	7	7	7	7	8	7	7	7	7	7	8	7	7	7	131380	143370	182820	157580	136760	204740	729950	686690	660010	688750	707060	685060	1.05344	0.991009	0.952505	0.993982	1.02041
P20645	Cation-dependent mannose-6-phosphate receptor OS=Homo sapiens OX=9606 GN=M6PR PE=1 SV=1	M6PR	30.993	22.4	26	5	5	5	4	6	5	4	3	4	4	5	4	4	4	4	4	5	4	4	4	4	4	5	4	4	4	4	97217	96386	88068	84850	91744	81961	470970	441760	444250	400390	440770	421890	1.07855	1.01165	1.01736	0.916913	1.00938
P20674	Cytochrome c oxidase subunit 5A, mitochondrial OS=Homo sapiens OX=9606 GN=COX5A PE=1 SV=2	COX5A	16.762	33.3	19	4	4	4	3	4	3	3	4	2	3	4	4	3	4	3	3	4	4	3	4	3	3	4	4	3	4	3	37440	175930	181950	34650	174850	150220	1041300	1199900	1281400	942570	1231500	1439600	0.875499	1.00885	1.07737	0.79249	1.03541
P20700	Lamin-B1 OS=Homo sapiens OX=9606 GN=LMNB1 PE=1 SV=2	LMNB1	66.408	42.5	118	22	20	20	22	20	19	19	17	21	20	22	22	22	20	21	18	20	20	20	18	19	18	20	20	20	18	19	137910	141310	142210	164260	130600	141870	529890	469720	503100	583370	485310	525820	1.02652	0.909954	0.974619	1.13012	0.940156
P20749	B-cell lymphoma 3 protein OS=Homo sapiens OX=9606 GN=BCL3 PE=1 SV=2	BCL3	47.583	24.2	23	7	7	7	2	4	5	5	3	4	7	7	7	7	6	6	7	7	7	7	6	6	7	7	7	7	6	6	10150	11158	10182	11340	9858.4	9136	88094	108490	97207	115570	102250	115400	0.84299	1.03816	0.930194	1.10591	0.978452
P20810	Calpastatin OS=Homo sapiens OX=9606 GN=CAST PE=1 SV=4	CAST	76.572	49.4	123	22	22	22	20	19	16	24	24	20	19	20	19	18	20	19	19	20	19	18	20	19	19	20	19	18	20	19	267160	230570	201790	311350	245580	212220	1122300	1008600	971150	1350400	1010700	948110	1.05031	0.943902	0.908854	1.26378	0.945867
P20839	Inosine-5'-monophosphate dehydrogenase 1 OS=Homo sapiens OX=9606 GN=IMPDH1 PE=1 SV=2	IMPDH1	55.405	27.8	82	12	11	11	14	13	12	16	13	14	12	12	12	12	12	12	11	11	11	11	11	11	11	11	11	11	11	11	73042	78969	73740	71800	75036	71917	363270	378820	396270	356550	370640	404010	0.960371	1.00148	1.04761	0.942606	0.979855
P20933	N(4)-(beta-N-acetylglucosaminyl)-L-asparaginase OS=Homo sapiens OX=9606 GN=AGA PE=1 SV=2	AGA	37.208	9.5	3	2	2	2	0	1	0	1	0	1	2	2	2	1	2	2	2	2	2	1	2	2	2	2	2	1	2	2	16268	10919	10333	13232	11228	11502	0	0	0	0	0	0
P20936	Ras GTPase-activating protein 1 OS=Homo sapiens OX=9606 GN=RASA1 PE=1 SV=1	RASA1	116.4	22.1	64	16	16	16	11	10	11	13	9	10	14	11	12	13	10	12	14	11	12	13	10	12	14	11	12	13	10	12	16021	11595	12373	15591	10511	12622	138770	99754	111150	136890	100740	120790	1.17586	0.845261	0.941824	1.15993	0.853615
Q9UQ88	Cyclin-dependent kinase 11A OS=Homo sapiens OX=9606 GN=CDK11A PE=1 SV=4	CDK11A	91.361	20.3	64	13	13	13	10	11	11	10	9	13	13	12	13	13	12	12	13	12	13	13	12	12	13	12	13	13	12	12	20159	18795	19282	19431	16759	17950	138970	135720	144710	137370	127740	139750	1.0116	0.987941	1.05338	0.999951	0.929852
P21266	Glutathione S-transferase Mu 3 OS=Homo sapiens OX=9606 GN=GSTM3 PE=1 SV=3	GSTM3	26.559	39.6	38	7	6	7	8	7	4	5	8	6	7	7	7	7	7	7	6	6	6	6	6	6	7	7	7	7	7	7	49054	39331	36836	50991	42556	42598	201150	156010	150960	214680	166830	181530	1.12672	0.873875	0.845588	1.20251	0.934482
P21281	V-type proton ATPase subunit B, brain isoform OS=Homo sapiens OX=9606 GN=ATP6V1B2 PE=1 SV=3	ATP6V1B2	56.5	45.6	81	17	17	17	14	14	14	14	13	12	15	16	13	16	14	14	15	16	13	16	14	14	15	16	13	16	14	14	85706	83380	81645	82377	90960	78486	398710	381450	384400	359120	393750	376930	1.04267	0.997533	1.00525	0.939138	1.0297
P21283	V-type proton ATPase subunit C 1 OS=Homo sapiens OX=9606 GN=ATP6V1C1 PE=1 SV=4	ATP6V1C1	43.941	42.1	74	16	16	16	11	12	13	14	11	13	15	15	16	16	16	15	15	15	16	16	16	15	15	15	16	16	16	15	45263	51928	45615	40981	49718	46257	185340	207310	200430	174540	191880	198500	0.960311	1.07414	1.0385	0.904352	0.994197
P21291	Cysteine and glycine-rich protein 1 OS=Homo sapiens OX=9606 GN=CSRP1 PE=1 SV=3	CSRP1	20.567	50.3	48	7	7	7	9	8	8	7	8	8	7	7	7	7	7	7	7	7	7	7	7	7	7	7	7	7	7	7	195150	178480	132690	135500	147970	125140	464320	407520	398810	396810	404150	384670	1.1342	0.995457	0.97418	0.969295	0.987225
P21333	Filamin-A OS=Homo sapiens OX=9606 GN=FLNA PE=1 SV=4	FLNA	280.74	63	998	113	104	107	172	163	178	155	166	164	108	112	112	105	111	109	100	103	103	97	102	100	103	106	106	100	105	103	2105300	1862700	1855100	1623100	1933900	1813200	7835500	6705900	6989400	6447300	6908800	7059700	1.12078	0.959205	0.999757	0.922215	0.988228
P21359	Neurofibromin OS=Homo sapiens OX=9606 GN=NF1 PE=1 SV=2	NF1	319.37	12.4	80	24	24	24	15	10	12	16	13	14	16	18	15	19	18	18	16	18	15	19	18	18	16	18	15	19	18	18	5076.4	7024.9	5825.4	6534.9	5829.3	5405.4	351460	347810	338750	460740	335190	380180	0.95241	0.942519	0.917968	1.24855	0.908321
P21397	Amine oxidase [flavin-containing] A OS=Homo sapiens OX=9606 GN=MAOA PE=1 SV=1	MAOA	59.681	28.8	57	10	10	10	8	11	8	11	11	8	7	10	7	9	10	8	7	10	7	9	10	8	7	10	7	9	10	8	34270	57031	35853	62913	59185	38807	220880	328810	231180	386340	336450	257890	0.752337	1.11996	0.78742	1.31591	1.14598
P21399	Cytoplasmic aconitate hydratase OS=Homo sapiens OX=9606 GN=ACO1 PE=1 SV=3	ACO1	98.398	36.1	128	22	22	22	22	20	24	20	22	20	21	21	21	20	20	19	21	21	21	20	20	19	21	21	21	20	20	19	104610	91308	84196	93519	77614	84906	536030	436170	472940	483390	389550	455400	1.15962	0.943587	1.02313	1.04574	0.842732
P21579	Synaptotagmin-1 OS=Homo sapiens OX=9606 GN=SYT1 PE=1 SV=1	SYT1	47.573	12.8	14	4	4	4	2	4	1	1	4	2	3	4	2	4	4	3	3	4	2	4	4	3	3	4	2	4	4	3	3431.8	5265	2334.8	7341.8	4185.1	3826.1	37116	37697	39210	54931	31107	36257	0.942357	0.957109	0.995523	1.39467	0.789792
P21580	Tumor necrosis factor alpha-induced protein 3 OS=Homo sapiens OX=9606 GN=TNFAIP3 PE=1 SV=1	TNFAIP3	89.613	2.4	5	1	1	1	1	1	1	0	1	1	1	1	1	1	1	1	1	1	1	1	1	1	1	1	1	1	1	1	772.89	950.8	659.28	513.84	935.92	608.82	0	0	0	0	0	0
P21589	5'-nucleotidase OS=Homo sapiens OX=9606 GN=NT5E PE=1 SV=1	NT5E	63.367	45.3	102	17	17	17	17	17	17	17	16	18	15	15	16	15	14	17	15	15	16	15	14	17	15	15	16	15	14	17	147260	194070	157390	147990	186080	155920	720680	902880	771420	708470	853570	767910	0.915163	1.14653	0.979595	0.899658	1.08391
P21709	Ephrin type-A receptor 1 OS=Homo sapiens OX=9606 GN=EPHA1 PE=1 SV=4	EPHA1	108.13	1.5	2	1	1	1	1	0	0	1	0	0	1	0	0	1	0	0	1	0	0	1	0	0	1	0	0	1	0	0	1034.5			675.22			0	0	0	0	0	0
P21796	Voltage-dependent anion-selective channel protein 1 OS=Homo sapiens OX=9606 GN=VDAC1 PE=1 SV=2	VDAC1	30.772	65	120	15	15	15	23	20	18	20	19	20	15	15	15	14	15	15	15	15	15	14	15	15	15	15	15	14	15	15	832880	754310	800590	722850	901560	725690	1879200	1692600	1782000	1762300	1729000	1785800	1.06061	0.955291	1.00575	0.994629	0.975835
P21912	Succinate dehydrogenase [ubiquinone] iron-sulfur subunit, mitochondrial OS=Homo sapiens OX=9606 GN=SDHB PE=1 SV=3	SDHB	31.629	26.8	39	7	7	7	6	9	6	7	5	6	6	7	6	6	6	6	6	7	6	6	6	6	6	7	6	6	6	6	104450	112580	86124	113810	99585	83797	566480	525740	470610	630430	516610	484890	1.06389	0.987379	0.883841	1.18399	0.970233
P21926	CD9 antigen OS=Homo sapiens OX=9606 GN=CD9 PE=1 SV=4	CD9	25.416	15.4	11	2	2	2	2	2	2	1	2	2	2	2	2	2	2	2	2	2	2	2	2	2	2	2	2	2	2	2	289290	328050	270750	302240	307730	241540	1018300	1117400	978590	1073300	1049600	880240	0.998753	1.09595	0.959805	1.0527	1.02945
P21953	2-oxoisovalerate dehydrogenase subunit beta, mitochondrial OS=Homo sapiens OX=9606 GN=BCKDHB PE=1 SV=2	BCKDHB	43.122	4.3	6	1	1	1	1	1	1	1	1	1	1	1	1	1	1	1	1	1	1	1	1	1	1	1	1	1	1	1	943.88	1472.6	919.96	1478.5	1365.4	756.81	0	0	0	0	0	0
P21964	Catechol O-methyltransferase OS=Homo sapiens OX=9606 GN=COMT PE=1 SV=2	COMT	30.037	62.4	114	12	12	12	17	21	20	18	20	18	12	12	12	12	12	12	12	12	12	12	12	12	12	12	12	12	12	12	614240	860860	707740	779580	810540	630310	1249300	1668600	1459800	1598300	1592500	1305000	0.84474	1.12826	0.987074	1.08072	1.0768
P21980	Protein-glutamine gamma-glutamyltransferase 2 OS=Homo sapiens OX=9606 GN=TGM2 PE=1 SV=2	TGM2	77.328	48	117	22	22	22	22	21	18	17	18	21	21	22	20	19	21	20	21	22	20	19	21	20	21	22	20	19	21	20	164620	183870	153420	125190	174010	178390	785030	818670	739900	594620	779150	876130	1.0254	1.06934	0.966453	0.776689	1.01772
P22033	Methylmalonyl-CoA mutase, mitochondrial OS=Homo sapiens OX=9606 GN=MMUT PE=1 SV=4	MMUT	83.134	7.9	9	4	4	4	2	2	1	1	1	2	3	4	2	2	3	2	3	4	2	2	3	2	3	4	2	2	3	2	6890.6	8129.2	6660.8	8573.7	7708.8	6554.1	167520	238310	196460	227580	229500	197620	0.799624	1.13753	0.937764	1.08631	1.09547
P22059	Oxysterol-binding protein 1 OS=Homo sapiens OX=9606 GN=OSBP PE=1 SV=1	OSBP	89.42	31.7	107	19	18	19	15	20	19	18	18	17	16	18	16	16	18	14	15	17	15	15	17	13	16	18	16	16	18	14	48197	60749	53541	51388	59499	48680	260570	267780	263750	279040	265540	269980	0.973087	1.00001	0.984963	1.04206	0.991647
P22061	Protein-L-isoaspartate(D-aspartate) O-methyltransferase OS=Homo sapiens OX=9606 GN=PCMT1 PE=1 SV=4	PCMT1	24.636	61.2	66	11	11	11	14	12	11	9	10	10	10	10	10	9	8	9	10	10	10	9	8	9	10	10	10	9	8	9	291040	248640	227470	252000	224170	217600	1016500	877810	909370	1069500	858990	952110	1.07296	0.926566	0.959879	1.1289	0.906701
P22087	rRNA 2'-O-methyltransferase fibrillarin OS=Homo sapiens OX=9606 GN=FBL PE=1 SV=2	FBL	33.784	51.7	90	13	11	13	15	14	16	16	13	16	12	12	11	12	11	11	10	10	9	10	9	9	12	12	11	12	11	11	192170	153940	159190	185840	163400	161240	524510	422180	435040	532090	422740	443200	1.13213	0.911259	0.939016	1.1485	0.912467
P22102	Trifunctional purine biosynthetic protein adenosine-3 OS=Homo sapiens OX=9606 GN=GART PE=1 SV=1	GART	107.77	53.1	209	35	35	35	36	32	36	30	36	39	35	32	30	32	34	33	35	32	30	32	34	33	35	32	30	32	34	33	149800	121500	118050	128810	136790	117540	617380	506950	540200	575490	519130	533440	1.12504	0.923802	0.984392	1.0487	0.945997
P22223	Cadherin-3 OS=Homo sapiens OX=9606 GN=CDH3 PE=1 SV=2	CDH3	91.417	26.2	61	15	15	15	7	10	12	8	12	12	11	14	15	9	14	14	11	14	15	9	14	14	11	14	15	9	14	14	27255	49314	45446	22793	49368	43726	213610	384480	380660	210500	402310	386300	0.648003	1.16635	1.15476	0.638569	1.22044
P22234	Multifunctional protein ADE2 OS=Homo sapiens OX=9606 GN=PAICS PE=1 SV=3	PAICS	47.079	50.1	84	15	15	15	13	16	12	13	15	15	14	14	14	14	15	15	14	14	14	14	15	15	14	14	14	14	15	15	374130	376700	395480	379110	397370	411570	1514500	1493100	1699900	1574500	1551200	1734200	0.949788	0.936367	1.06606	0.987416	0.972803
P22307	Sterol carrier protein 2 OS=Homo sapiens OX=9606 GN=SCP2 PE=1 SV=2	SCP2	58.993	24.1	56	11	11	11	8	11	8	9	11	9	10	10	10	10	10	11	10	10	10	10	10	11	10	10	10	10	10	11	43863	39833	37753	45324	41959	41164	341200	293490	297350	352730	281930	290650	1.10222	0.948093	0.960562	1.13946	0.910749
P22314	Ubiquitin-like modifier-activating enzyme 1 OS=Homo sapiens OX=9606 GN=UBA1 PE=1 SV=3	UBA1	117.85	51.5	258	38	38	38	43	46	44	41	43	41	36	36	33	34	33	31	36	36	33	34	33	31	36	36	33	34	33	31	551880	515370	495860	616920	486440	503600	3336100	3026600	3088100	3497700	2972900	3142600	1.04997	0.95256	0.971916	1.10083	0.935659
P22392	Nucleoside diphosphate kinase B OS=Homo sapiens OX=9606 GN=NME2 PE=1 SV=1	NME2	17.298	76.3	136	12	1	12	22	24	24	22	20	24	11	12	12	11	11	12	1	1	1	1	1	1	11	12	12	11	11	12	3777800	3662700	3687500	3475000	3629700	3448500	7691800	7188100	7653400	6987800	7161200	7187800
P22570	NADPH:adrenodoxin oxidoreductase, mitochondrial OS=Homo sapiens OX=9606 GN=FDXR PE=1 SV=3	FDXR	53.836	26.7	44	9	9	9	9	8	6	10	6	5	9	8	8	9	8	7	9	8	8	9	8	7	9	8	8	9	8	7	22060	19879	13614	27824	16052	11543	155480	128570	102500	201410	118960	90166	1.17036	0.9678	0.77156	1.5161	0.895462
P22612	cAMP-dependent protein kinase catalytic subunit gamma OS=Homo sapiens OX=9606 GN=PRKACG PE=1 SV=3	PRKACG	40.434	14.8	6	3	1	1	1	1	1	1	1	1	3	3	3	3	3	3	1	1	1	1	1	1	1	1	1	1	1	1	4175	4220.6	2867	3601.2	3339.6	1810	0	0	0	0	0	0
P22626	Heterogeneous nuclear ribonucleoproteins A2/B1 OS=Homo sapiens OX=9606 GN=HNRNPA2B1 PE=1 SV=2	HNRNPA2B1	37.429	52.1	134	16	16	16	18	26	21	24	19	26	13	15	15	14	15	15	13	15	15	14	15	15	13	15	15	14	15	15	1622900	1848300	1785900	1706500	1842300	1841900	7471700	7668400	8144700	7990500	7855400	8426000	0.942668	0.967485	1.02758	1.00812	0.991078
P22670	MHC class II regulatory factor RFX1 OS=Homo sapiens OX=9606 GN=RFX1 PE=1 SV=2	RFX1	104.76	2.6	4	2	2	2	0	0	2	1	0	1	1	0	2	1	0	2	1	0	2	1	0	2	1	0	2	1	0	2	132.35		308.14	138.15		391.27	0	0	6073.6	0	0	8008.7			0.862586
P22676	Calretinin OS=Homo sapiens OX=9606 GN=CALB2 PE=2 SV=2	CALB2	31.54	31.7	31	8	8	8	6	6	3	4	6	6	8	7	7	7	8	8	8	7	7	7	8	8	8	7	7	7	8	8	62374	61123	49427	59013	67016	77142	339850	348070	294590	347020	375380	437710	0.951685	0.974704	0.824943	0.971764	1.05118
P22681	E3 ubiquitin-protein ligase CBL OS=Homo sapiens OX=9606 GN=CBL PE=1 SV=2	CBL	99.632	12.6	28	8	8	8	6	3	5	4	5	5	7	5	6	5	8	6	7	5	6	5	8	6	7	5	6	5	8	6	12335	6841.2	3440	3147.2	7886.9	12926	236150	195300	210130	223240	211330	245450	1.07211	0.886653	0.95398	1.0135	0.959428
P22694	cAMP-dependent protein kinase catalytic subunit beta OS=Homo sapiens OX=9606 GN=PRKACB PE=1 SV=2	PRKACB	40.622	39	12	10	3	3	2	2	2	3	1	2	8	8	8	9	7	7	2	2	2	3	1	2	2	2	2	3	1	2	3700.4	3015.2	2656.6	4169.2	2006.6	2123.1	55950	47833	38885	60369	0	30342	1.19869	1.02479	0.833087	1.29337
P22695	Cytochrome b-c1 complex subunit 2, mitochondrial OS=Homo sapiens OX=9606 GN=UQCRC2 PE=1 SV=3	UQCRC2	48.442	40.4	87	13	13	13	15	14	15	14	16	13	13	11	12	10	13	13	13	11	12	10	13	13	13	11	12	10	13	13	319900	274640	244610	294670	297640	272370	1022600	927560	839310	1046600	907240	887140	1.08972	0.98844	0.894397	1.11529	0.966786
P22830	Ferrochelatase, mitochondrial OS=Homo sapiens OX=9606 GN=FECH PE=1 SV=2	FECH	47.862	21	23	6	6	6	3	4	2	5	5	4	5	6	4	6	6	6	5	6	4	6	6	6	5	6	4	6	6	6	4200.9	4790.3	2170.5	7255.2	5942.6	4501.4	37804	30353	23934	51467	38693	33445	1.05159	0.844327	0.66577	1.43165	1.07632
P23193	Transcription elongation factor A protein 1 OS=Homo sapiens OX=9606 GN=TCEA1 PE=1 SV=2	TCEA1	33.969	26.6	37	7	7	7	5	6	7	7	5	7	7	7	6	7	6	7	7	7	6	7	6	7	7	7	6	7	6	7	52694	42108	35973	54295	33229	40068	233960	164660	179590	229090	165840	178950	1.21845	0.857537	0.935292	1.19308	0.863683
P23229	Integrin alpha-6 OS=Homo sapiens OX=9606 GN=ITGA6 PE=1 SV=5	ITGA6	126.6	21.9	75	18	18	18	11	13	12	12	13	14	14	15	13	14	15	15	14	15	13	14	15	15	14	15	13	14	15	15	15220	16885	13589	16462	24792	14941	172370	189100	171430	200830	190360	180560	0.936242	1.02711	0.931137	1.09082	1.03396
P23246	Splicing factor, proline- and glutamine-rich OS=Homo sapiens OX=9606 GN=SFPQ PE=1 SV=2	SFPQ	76.149	47.1	172	27	26	27	25	23	34	30	30	30	23	23	26	24	27	23	22	22	25	23	26	22	23	23	26	24	27	23	415910	397280	439190	426660	460380	419710	2571800	2694500	2829800	2747200	2720500	2912100	0.936568	0.981251	1.03052	1.00044	0.99072
P23258	Tubulin gamma-1 chain OS=Homo sapiens OX=9606 GN=TUBG1 PE=1 SV=2	TUBG1	51.169	65.2	101	16	16	16	14	18	15	17	18	19	15	15	14	14	15	15	15	15	14	14	15	15	15	15	14	14	15	15	50831	70856	62637	50153	74096	89560	203850	262430	264810	197210	270390	261410	0.837682	1.07841	1.08819	0.810397	1.11112
P23284	Peptidyl-prolyl cis-trans isomerase B OS=Homo sapiens OX=9606 GN=PPIB PE=1 SV=2	PPIB	23.742	47.7	59	10	10	10	11	8	11	9	10	10	10	10	9	10	10	10	10	10	9	10	10	10	10	10	9	10	10	10	1100200	1122700	1120700	1165600	1214200	977100	2536500	2521600	2674600	2652800	2687600	2654100	0.967687	0.962002	1.02037	1.01206	1.02533
P23368	NAD-dependent malic enzyme, mitochondrial OS=Homo sapiens OX=9606 GN=ME2 PE=1 SV=1	ME2	65.443	44.7	88	18	18	18	17	16	12	17	15	11	16	14	15	16	14	13	16	14	15	16	14	13	16	14	15	16	14	13	70197	60364	47452	56197	41149	44505	531810	317020	349420	471150	311280	345790	1.37155	0.817599	0.901159	1.2151	0.802796
P23381	Tryptophan--tRNA ligase, cytoplasmic OS=Homo sapiens OX=9606 GN=WARS1 PE=1 SV=2	WARS1	53.165	62.4	137	20	20	20	22	24	24	27	21	19	18	19	19	19	20	19	18	19	19	19	20	19	18	19	19	19	20	19	1003100	940150	772620	1178000	936080	641420	4379600	4142500	3322500	5184300	4136600	2854700	1.09398	1.03475	0.829926	1.29499	1.03328
P23396	40S ribosomal protein S3 OS=Homo sapiens OX=9606 GN=RPS3 PE=1 SV=2	RPS3	26.688	74.1	124	18	18	18	22	20	22	21	21	18	17	18	16	17	17	17	17	18	16	17	17	17	17	18	16	17	17	17	896730	953530	991820	960860	1023400	971960	2688400	2655800	2898900	2783700	2722500	2811100	0.974034	0.962223	1.0503	1.00856	0.986389
P23434	Glycine cleavage system H protein, mitochondrial OS=Homo sapiens OX=9606 GN=GCSH PE=1 SV=2	GCSH	18.884	17.3	11	2	2	2	2	2	1	2	2	2	2	2	2	2	2	2	2	2	2	2	2	2	2	2	2	2	2	2	68329	50513	61630	64552	57712	65914	367100	247830	326190	345670	271690	375030	1.13917	0.769057	1.01222	1.07267	0.843099
P23443	Ribosomal protein S6 kinase beta-1 OS=Homo sapiens OX=9606 GN=RPS6KB1 PE=1 SV=2	RPS6KB1	59.139	9.3	12	4	3	3	2	3	1	2	1	3	4	4	4	4	4	3	3	3	3	3	3	3	3	3	3	3	3	3	175690	169200	163030	164060	184500	185400	2888900	3489300	3264400	3259800	3233200	3485900	0.883388	1.06698	0.998211	0.996805	0.988671
P23458	Tyrosine-protein kinase JAK1 OS=Homo sapiens OX=9606 GN=JAK1 PE=1 SV=2	JAK1	133.28	4.4	11	4	3	3	2	1	2	1	3	2	3	3	2	3	4	3	2	2	2	2	3	3	2	2	2	2	3	3	300.76	370.69	437.88	378.17	630.14	707.98	11616	13841	16845	14947	19266	21818	0.708775	0.844538	1.02783	0.912023	1.17556
P23469	Receptor-type tyrosine-protein phosphatase epsilon OS=Homo sapiens OX=9606 GN=PTPRE PE=1 SV=1	PTPRE	80.641	11	26	6	6	6	5	3	5	3	5	5	5	6	6	6	6	5	5	6	6	6	6	5	5	6	6	6	6	5	3321.5	4531.7	4750.5	3843.6	4361.5	3762.2	39992	51431	51142	42248	48556	47563	0.854128	1.09844	1.09226	0.902311	1.03703
P23497	Nuclear autoantigen Sp-100 OS=Homo sapiens OX=9606 GN=SP100 PE=1 SV=3	SP100	100.42	22.8	49	14	13	14	4	13	7	5	12	8	8	13	11	8	13	12	8	12	10	8	12	11	8	13	11	8	13	12	10048	37163	19720	13843	42395	27792	150200	414470	247100	219400	471890	341710	0.488516	1.34804	0.803677	0.713585	1.53479
P23526	Adenosylhomocysteinase OS=Homo sapiens OX=9606 GN=AHCY PE=1 SV=4	AHCY	47.716	57.6	155	20	20	20	27	24	27	26	26	25	19	20	19	19	20	19	19	20	19	19	20	19	19	20	19	19	20	19	1098000	1068400	1117800	1130300	1043700	995430	3164800	2979200	3315400	3258300	2908200	3004400	1.01924	0.959469	1.06774	1.04936	0.936603
P23528	Cofilin-1 OS=Homo sapiens OX=9606 GN=CFL1 PE=1 SV=3	CFL1	18.502	64.5	113	13	10	13	19	22	17	18	16	21	12	12	12	13	12	12	9	9	9	10	9	9	12	12	12	13	12	12	5112800	5370400	5199300	4695000	5119800	4898000	17921000	18253000	18759000	16720000	17976000	18966000	0.990156	1.0085	1.03646	0.923799	0.993195
P23588	Eukaryotic translation initiation factor 4B OS=Homo sapiens OX=9606 GN=EIF4B PE=1 SV=2	EIF4B	69.15	33.7	81	15	15	15	13	10	19	11	13	15	14	14	15	14	13	15	14	14	15	14	13	15	14	14	15	14	13	15	161890	149000	158830	135110	140890	147640	1065800	985310	1038700	973430	928960	1058600	1.05685	0.977038	1.02998	0.965257	0.921161
P23610	40-kDa huntingtin-associated protein OS=Homo sapiens OX=9606 GN=F8A1 PE=1 SV=2	F8A1	39.103	18.3	17	4	4	4	3	3	3	2	3	3	3	3	3	3	3	3	3	3	3	3	3	3	3	3	3	3	3	3	10219	9365.4	8590.9	11135	8820.8	8770.5	52156	45101	45367	55781	42645	47692	1.08379	0.93719	0.942717	1.15912	0.886154
P23634	Plasma membrane calcium-transporting ATPase 4 OS=Homo sapiens OX=9606 GN=ATP2B4 PE=1 SV=2	ATP2B4	137.92	18.9	38	16	9	9	5	6	7	8	5	7	15	16	14	15	15	14	9	9	8	8	9	9	9	9	8	8	9	9	14960	12426	12431	14887	14345	15351	171630	145390	149820	185120	163680	182220	1.03199	0.874211	0.900848	1.1131	0.984186
P23743	Diacylglycerol kinase alpha OS=Homo sapiens OX=9606 GN=DGKA PE=1 SV=3	DGKA	82.629	31.4	58	15	15	15	10	9	6	14	11	8	12	12	9	14	13	12	12	12	9	14	13	12	12	12	9	14	13	12	16082	17887	11629	22035	17079	11179	113930	123450	93154	154970	113760	79581	1.00697	1.09112	0.823346	1.36971	1.00547
P23786	Carnitine O-palmitoyltransferase 2, mitochondrial OS=Homo sapiens OX=9606 GN=CPT2 PE=1 SV=2	CPT2	73.776	28.9	58	13	13	13	9	8	9	11	11	10	10	12	10	12	11	11	10	12	10	12	11	11	10	12	10	12	11	11	12512	15301	10614	18150	14276	11731	91263	96495	80205	132720	103530	84946	0.929423	0.982706	0.816808	1.35162	1.05435
P23919	Thymidylate kinase OS=Homo sapiens OX=9606 GN=DTYMK PE=1 SV=4	DTYMK	23.819	45.8	77	12	12	12	12	12	13	14	11	15	11	11	11	12	11	11	11	11	11	12	11	11	11	11	11	12	11	11	187970	170660	184990	185050	154080	157560	509860	438850	499210	499720	399590	428540	1.10209	0.948602	1.07907	1.08018	0.863739
P23921	Ribonucleoside-diphosphate reductase large subunit OS=Homo sapiens OX=9606 GN=RRM1 PE=1 SV=1	RRM1	90.069	40.5	53	21	21	21	3	8	10	5	16	11	9	16	17	8	18	18	9	16	17	8	18	18	9	16	17	8	18	18	5478.5	20482	21124	6011.9	32361	31669	55937	141300	146040	64096	210770	230290	0.395579	0.999254	1.03277	0.453278	1.49054
P24043	Laminin subunit alpha-2 OS=Homo sapiens OX=9606 GN=LAMA2 PE=1 SV=4	LAMA2	343.9	1.4	5	3	3	3	1	1	0	2	0	1	2	2	2	3	2	2	2	2	2	3	2	2	2	2	2	3	2	2	530.07	470.84	470.31	8521.3	469.1	481.79	389710	317700	0	396690	0	382420	1.04865	0.854883		1.06743
P24385	G1/S-specific cyclin-D1 OS=Homo sapiens OX=9606 GN=CCND1 PE=1 SV=1	CCND1	33.729	12.9	3	2	2	2	0	1	0	0	1	1	0	1	0	1	1	1	0	1	0	1	1	1	0	1	0	1	1	1		518.93		1440.9	409.51	2577.3	0	0	0	0	0	0
P24386	Rab proteins geranylgeranyltransferase component A 1 OS=Homo sapiens OX=9606 GN=CHM PE=1 SV=3	CHM	73.475	18.1	22	8	7	8	3	5	5	2	3	4	6	7	7	6	6	6	5	6	6	5	5	5	6	7	7	6	6	6	9933.2	9407.4	9670.7	8364	8665.5	9839.1	105280	89529	99147	97846	79888	108750	1.08828	0.92546	1.02488	1.01143	0.825801
P24390	ER lumen protein-retaining receptor 1 OS=Homo sapiens OX=9606 GN=KDELR1 PE=1 SV=1	KDELR1	24.542	26.9	21	4	3	4	5	4	3	3	3	3	4	4	2	3	4	3	3	3	1	2	3	2	4	4	2	3	4	3	38578	41424	26772	28573	37290	32055	226730	252800	190220	159550	236110	194860	1.07943	1.20355	0.905615	0.759599	1.12409
P24468	COUP transcription factor 2 OS=Homo sapiens OX=9606 GN=NR2F2 PE=1 SV=1	NR2F2	45.571	12.8	14	4	4	4	2	4	2	2	2	2	3	4	3	4	3	4	3	4	3	4	3	4	3	4	3	4	3	4	2426.6	3114.4	2863.1	3189	3104.9	3785.5	21179	25635	27851	25253	27229	34423	0.786495	0.951971	1.03426	0.937785	1.01117
P24534	Elongation factor 1-beta OS=Homo sapiens OX=9606 GN=EEF1B2 PE=1 SV=3	EEF1B2	24.763	52	43	8	6	6	7	6	8	8	7	7	7	7	8	8	8	8	5	5	6	6	6	6	5	5	6	6	6	6	980200	927470	896920	888500	928520	865030	4963300	4559500	4701500	4421500	4340600	4633500	1.0782	0.990482	1.02133	0.960503	0.942929
P24539	ATP synthase F(0) complex subunit B1, mitochondrial OS=Homo sapiens OX=9606 GN=ATP5PB PE=1 SV=2	ATP5PB	28.908	45.7	61	10	10	10	11	11	11	7	11	10	9	9	10	7	9	8	9	9	10	7	9	8	9	9	10	7	9	8	98283	118380	126840	119670	135520	126190	463220	427570	425760	456080	439210	427040	1.05322	0.972162	0.968047	1.03699	0.998628
P24666	Low molecular weight phosphotyrosine protein phosphatase OS=Homo sapiens OX=9606 GN=ACP1 PE=1 SV=3	ACP1	18.042	65.8	29	7	7	7	6	5	4	5	5	4	7	6	6	5	6	6	7	6	6	5	6	6	7	6	6	5	6	6	344500	359060	353110	309350	338380	320660	753740	748840	788120	703440	731550	764810	1.00711	1.00057	1.05305	0.939904	0.977464
P24752	Acetyl-CoA acetyltransferase, mitochondrial OS=Homo sapiens OX=9606 GN=ACAT1 PE=1 SV=1	ACAT1	45.199	37.9	82	15	15	15	10	16	13	15	15	13	14	15	15	14	15	14	14	15	15	14	15	14	14	15	15	14	15	14	182200	139090	140820	178140	151830	150830	1096200	781180	870410	1089300	867330	947070	1.1638	0.829353	0.924086	1.15647	0.920816
P24821	Tenascin OS=Homo sapiens OX=9606 GN=TNC PE=1 SV=3	TNC	240.85	9.8	39	14	14	14	3	7	4	3	14	8	6	9	7	5	14	11	6	9	7	5	14	11	6	9	7	5	14	11	1010.1	2190	1598.2	1154.6	3737	3039.4	32332	46187	44815	38716	68338	65881	0.654783	0.935373	0.907587	0.784071	1.38397
P24844	Myosin regulatory light polypeptide 9 OS=Homo sapiens OX=9606 GN=MYL9 PE=1 SV=4	MYL9	19.827	62.2	22	9	3	3	5	4	3	3	4	3	8	8	8	9	9	8	3	3	3	3	3	3	3	3	3	3	3	3	138210	144560	144990	93145	166820	137670	633060	634520	663240	410210	728640	619510	1.0296	1.03197	1.07868	0.667156	1.18504
P24863	Cyclin-C OS=Homo sapiens OX=9606 GN=CCNC PE=1 SV=2	CCNC	33.242	12	6	2	2	2	2	1	1	1	0	1	2	1	1	1	1	1	2	1	1	1	1	1	2	1	1	1	1	1	736.86	348.9	327.57	379.14	381.3	400.01	0	0	0	0	0	0
P24864	G1/S-specific cyclin-E1 OS=Homo sapiens OX=9606 GN=CCNE1 PE=1 SV=2	CCNE1	47.077	3.4	4	1	1	1	1	0	1	1	1	0	1	1	1	1	1	1	1	1	1	1	1	1	1	1	1	1	1	1	1325	881.91	892.52	1113.6	933.76	816.47	0	0	0	0	0	0
P24928	DNA-directed RNA polymerase II subunit RPB1 OS=Homo sapiens OX=9606 GN=POLR2A PE=1 SV=2	POLR2A	217.17	20.6	114	28	28	28	20	21	17	18	18	20	24	25	26	24	27	26	24	25	26	24	27	26	24	25	26	24	27	26	8038.8	8907.1	9423.2	8946.1	9965.3	10215	62919	63925	69503	66464	69696	79713	0.915807	0.93045	1.01164	0.967406	1.01445
P24941	Cyclin-dependent kinase 2 OS=Homo sapiens OX=9606 GN=CDK2 PE=1 SV=2	CDK2	33.929	57.7	51	13	9	11	8	9	8	8	10	8	12	12	10	12	11	12	9	9	8	9	9	9	11	11	10	11	11	11	40805	57886	47819	39531	55012	49578	128240	173780	169880	126290	164250	158210	0.835757	1.13255	1.10713	0.823049	1.07044
P25098	Beta-adrenergic receptor kinase 1 OS=Homo sapiens OX=9606 GN=GRK2 PE=1 SV=2	GRK2	79.573	26.3	70	14	14	14	10	12	12	12	13	11	13	14	14	13	14	12	13	14	14	13	14	12	13	14	14	13	14	12	19241	23221	21241	23341	25882	20404	110170	124560	124670	136720	138250	133730	0.860591	0.972998	0.973858	1.06799	1.07994
P25205	DNA replication licensing factor MCM3 OS=Homo sapiens OX=9606 GN=MCM3 PE=1 SV=3	MCM3	90.98	50.9	157	31	31	31	23	29	26	26	26	27	24	28	27	27	28	26	24	28	27	27	28	26	24	28	27	27	28	26	86091	116550	108160	82099	111710	98646	377180	475210	501350	355450	468900	509560	0.842029	1.06088	1.11923	0.793519	1.04679
P25208	Nuclear transcription factor Y subunit beta OS=Homo sapiens OX=9606 GN=NFYB PE=1 SV=2	NFYB	22.831	6.3	6	1	1	1	1	1	1	1	1	1	1	1	1	1	1	1	1	1	1	1	1	1	1	1	1	1	1	1	10645	4327.7	9108.2	10485	6661.3	9848.5	0	0	0	0	0	0
P25325	3-mercaptopyruvate sulfurtransferase OS=Homo sapiens OX=9606 GN=MPST PE=1 SV=3	MPST	33.178	41.4	40	8	8	8	7	6	7	7	7	6	7	8	6	6	7	7	7	8	6	6	7	7	7	8	6	6	7	7	108930	95422	77248	106100	94812	88770	398940	320640	317010	443620	331690	340220	1.11222	0.893928	0.883808	1.23679	0.924735
P25398	40S ribosomal protein S12 OS=Homo sapiens OX=9606 GN=RPS12 PE=1 SV=3	RPS12	14.515	70.5	70	7	7	7	13	11	14	10	11	11	6	6	7	6	6	6	6	6	7	6	6	6	6	6	7	6	6	6	1697100	1701200	1650900	1673200	1671700	1541900	5210700	5103100	4936400	5031500	4900000	4896000	1.03945	1.01798	0.98473	1.0037	0.977468
P25440	Bromodomain-containing protein 2 OS=Homo sapiens OX=9606 GN=BRD2 PE=1 SV=2	BRD2	88.06	11.4	20	8	6	6	3	4	5	2	2	4	7	6	8	7	7	7	5	4	6	5	5	5	5	4	6	5	5	5	3627.4	2830.8	4511.2	3816.2	3606.3	3723.2	48003	50760	52163	49729	51623	52155	0.94608	1.00042	1.02807	0.980097	1.01743
P25445	Tumor necrosis factor receptor superfamily member 6 OS=Homo sapiens OX=9606 GN=FAS PE=1 SV=1	FAS	37.732	21.5	19	4	4	4	4	4	3	3	3	2	4	4	4	4	4	4	4	4	4	4	4	4	4	4	4	4	4	4	14565	10524	8043.5	9308.6	11124	8351	70454	90092	74151	82866	95009	80410	0.857484	1.09649	0.902479	1.00855	1.15634
P25490	Transcriptional repressor protein YY1 OS=Homo sapiens OX=9606 GN=YY1 PE=1 SV=2	YY1	44.712	19.1	36	6	6	6	6	7	6	6	6	5	6	6	6	6	6	6	6	6	6	6	6	6	6	6	6	6	6	6	27560	28506	23150	20571	24702	30375	109850	118130	123250	110010	125490	128050	0.922102	0.991606	1.03458	0.923445	1.05339
P25685	DnaJ homolog subfamily B member 1 OS=Homo sapiens OX=9606 GN=DNAJB1 PE=1 SV=4	DNAJB1	38.044	27.1	38	9	8	9	5	7	7	6	8	5	7	9	9	8	9	8	6	8	8	7	8	7	7	9	9	8	9	8	71105	99420	95243	92086	88623	92101	398460	508920	504450	491130	493960	489000	0.828422	1.05808	1.04878	1.02109	1.02697
P25686	DnaJ homolog subfamily B member 2 OS=Homo sapiens OX=9606 GN=DNAJB2 PE=1 SV=3	DNAJB2	35.58	20.1	21	5	4	4	4	4	2	5	3	3	3	4	4	4	3	5	3	4	3	4	3	4	3	4	3	4	3	4	7079.9	6513.5	5616.7	5864.7	5652.7	5901.8	46959	41643	38013	41806	40259	44780	1.11163	0.985789	0.899858	0.989647	0.953026
P25705	ATP synthase subunit alpha, mitochondrial OS=Homo sapiens OX=9606 GN=ATP5F1A PE=1 SV=1	ATP5F1A	59.75	51.4	168	23	23	23	28	30	33	26	26	25	21	23	22	21	22	22	21	23	22	21	22	22	21	23	22	21	22	22	766510	773610	729340	764480	745210	620380	3102400	2932400	2962300	3250600	2860700	2991000	1.02845	0.972099	0.98201	1.07758	0.94833
P25774	Cathepsin S OS=Homo sapiens OX=9606 GN=CTSS PE=1 SV=3	CTSS	37.495	4.2	4	1	1	1	1	2	0	0	1	0	1	1	1	0	1	0	1	1	1	0	1	0	1	1	1	0	1	0	234.53	516.26	380.67		1246.8		0	0	0	0	0	0
P25786	Proteasome subunit alpha type-1 OS=Homo sapiens OX=9606 GN=PSMA1 PE=1 SV=1	PSMA1	29.555	64.6	85	13	13	13	14	13	13	11	19	15	12	13	13	12	13	13	12	13	13	12	13	13	12	13	13	12	13	13	209700	232270	248880	213740	261350	238040	666040	684320	684480	666070	713550	658110	0.981258	1.00819	1.00842	0.981302	1.05125
P25787	Proteasome subunit alpha type-2 OS=Homo sapiens OX=9606 GN=PSMA2 PE=1 SV=2	PSMA2	25.898	51.7	64	8	8	8	12	9	11	11	10	11	8	8	8	8	8	8	8	8	8	8	8	8	8	8	8	8	8	8	136050	148080	133830	146520	141350	124720	451800	477630	461560	445860	456340	470300	0.980934	1.03702	1.00212	0.968037	0.990791
P25788	Proteasome subunit alpha type-3 OS=Homo sapiens OX=9606 GN=PSMA3 PE=1 SV=2	PSMA3	28.433	35.3	51	8	8	8	8	11	9	6	9	8	8	8	8	8	8	7	8	8	8	8	8	7	8	8	8	8	8	7	187040	216550	218450	199790	225560	184460	630590	667610	722960	679630	698820	745160	0.912847	0.966437	1.04656	0.983837	1.01162
P25789	Proteasome subunit alpha type-4 OS=Homo sapiens OX=9606 GN=PSMA4 PE=1 SV=1	PSMA4	29.483	37.2	45	6	6	6	6	9	8	7	8	7	6	6	6	6	6	6	6	6	6	6	6	6	6	6	6	6	6	6	112140	125630	112550	111630	129560	108920	587880	622010	594570	582410	656870	592220	0.97011	1.02643	0.981149	0.961083	1.08396
P25815	Protein S100-P OS=Homo sapiens OX=9606 GN=S100P PE=1 SV=2	S100P	10.4	24.2	13	2	2	2	2	3	2	2	2	2	2	2	2	2	2	2	2	2	2	2	2	2	2	2	2	2	2	2	27465	58493	19795	63672	71881	23184	62928	100990	32361	146520	159230	35390	0.702558	1.1275	0.361294	1.63582	1.77772
P25942	Tumor necrosis factor receptor superfamily member 5 OS=Homo sapiens OX=9606 GN=CD40 PE=1 SV=1	CD40	30.619	13.7	9	2	2	2	2	1	1	2	1	2	2	2	2	2	1	2	2	2	2	2	1	2	2	2	2	2	1	2	7006.2	5095.3	4886.6	6159.1	2771.8	5163.3	46183	31240	31883	40978	0	36164	1.23849	0.837767	0.855011	1.09891
P25963	NF-kappa-B inhibitor alpha OS=Homo sapiens OX=9606 GN=NFKBIA PE=1 SV=1	NFKBIA	35.609	17	4	2	2	2	0	1	2	0	0	1	0	2	2	0	2	2	0	2	2	0	2	2	0	2	2	0	2	2		3519.5	2959.8		3421.5	4270.3	0	27905	20224	0	27200	34255		1.01858	0.73821		0.992846
P26006	Integrin alpha-3 OS=Homo sapiens OX=9606 GN=ITGA3 PE=1 SV=5	ITGA3	116.61	21.3	83	17	17	17	15	12	13	19	12	12	16	15	14	17	16	16	16	15	14	17	16	16	16	15	14	17	16	16	71918	60821	59976	78146	62453	56175	399290	315040	351660	399620	313780	340430	1.13016	0.891698	0.995349	1.1311	0.888132
P26012	Integrin beta-8 OS=Homo sapiens OX=9606 GN=ITGB8 PE=1 SV=1	ITGB8	85.631	4.2	5	2	2	2	0	1	0	0	2	2	1	2	2	2	2	2	1	2	2	2	2	2	1	2	2	2	2	2	174.27	867.95	439.35	689.83	845.78	608	0	20561	13610	17863	20586	17315		1.1431	0.756658	0.993106	1.14449
P26038	Moesin OS=Homo sapiens OX=9606 GN=MSN PE=1 SV=3	MSN	67.819	54.8	239	31	19	31	37	33	40	37	46	46	29	29	28	29	29	29	19	17	18	19	18	18	29	29	28	29	29	29	1359900	1234200	1234300	1233100	1165300	1193700	5840900	5014700	5308600	5143800	4656800	5304500	1.12076	0.962228	1.01862	0.987	0.893554
P26196	Probable ATP-dependent RNA helicase DDX6 OS=Homo sapiens OX=9606 GN=DDX6 PE=1 SV=2	DDX6	54.416	60.9	117	21	21	21	20	22	20	17	18	20	19	19	18	19	19	18	19	19	18	19	19	18	19	19	18	19	19	18	118170	135600	135300	117760	137870	135990	437940	487620	510120	428120	484880	495000	0.924028	1.02885	1.07632	0.903308	1.02307
P26232	Catenin alpha-2 OS=Homo sapiens OX=9606 GN=CTNNA2 PE=1 SV=5	CTNNA2	105.31	14.5	16	11	1	1	2	3	3	3	3	2	10	9	10	10	11	10	1	1	1	1	1	1	1	1	1	1	1	1	13420	17912	16746	17130	15103	13278	465980	551640	550250	568680	449100	506080
P26358	DNA (cytosine-5)-methyltransferase 1 OS=Homo sapiens OX=9606 GN=DNMT1 PE=1 SV=2	DNMT1	183.16	26.8	119	33	33	33	10	28	23	10	23	25	24	32	29	22	30	30	24	32	29	22	30	30	24	32	29	22	30	30	12650	31518	26338	11330	32555	31001	102840	214410	209400	98333	236750	244820	0.557624	1.16258	1.13542	0.533185	1.28372
P26368	Splicing factor U2AF 65 kDa subunit OS=Homo sapiens OX=9606 GN=U2AF2 PE=1 SV=4	U2AF2	53.5	39.6	80	11	11	11	13	14	14	13	13	13	10	10	11	11	10	11	10	10	11	11	10	11	10	10	11	11	10	11	469140	535380	502000	455730	507610	476280	1295500	1410100	1390000	1232500	1355300	1315400	0.971771	1.05773	1.04266	0.924514	1.01663
P26373	60S ribosomal protein L13 OS=Homo sapiens OX=9606 GN=RPL13 PE=1 SV=4	RPL13	24.261	34.6	45	7	7	7	8	7	7	7	8	8	7	7	7	7	7	7	7	7	7	7	7	7	7	7	7	7	7	7	855940	654720	817600	897010	800510	806610	2022500	1511100	1919000	2207700	1753200	1934400	1.06936	0.798967	1.01464	1.16728	0.926973
P26440	Isovaleryl-CoA dehydrogenase, mitochondrial OS=Homo sapiens OX=9606 GN=IVD PE=1 SV=2	IVD	46.65	41.5	70	12	12	12	12	13	11	13	11	10	10	12	10	11	11	11	10	12	10	11	11	11	10	12	10	11	11	11	85064	78402	65813	89357	73540	64892	396510	346400	340960	410760	331640	322400	1.10722	0.967296	0.952105	1.14702	0.92608
P26572	Alpha-1,3-mannosyl-glycoprotein 2-beta-N-acetylglucosaminyltransferase OS=Homo sapiens OX=9606 GN=MGAT1 PE=1 SV=2	MGAT1	50.878	7.2	7	2	2	2	2	0	2	0	1	2	2	1	2	0	2	2	2	1	2	0	2	2	2	1	2	0	2	2	1538.7	1700.5	2055.6		2887.6	1937	26673	0	26782	0	50147	32114	0.786142		0.789354		1.478
P26583	High mobility group protein B2 OS=Homo sapiens OX=9606 GN=HMGB2 PE=1 SV=2	HMGB2	24.033	26.3	23	4	3	3	4	4	3	4	4	4	4	3	3	4	3	2	3	2	2	3	2	2	3	2	2	3	2	2	186770	60408	62536	166930	57260	54458	410930	292800	319720	447030	273200	251030	1.23606	0.88073	0.961704	1.34465	0.821774
P26599	Polypyrimidine tract-binding protein 1 OS=Homo sapiens OX=9606 GN=PTBP1 PE=1 SV=1	PTBP1	57.221	55.2	143	16	15	16	24	23	21	24	29	22	15	16	15	15	16	15	14	15	14	14	15	14	15	16	15	15	16	15	631750	671050	632550	645690	690170	620400	1856900	1840100	1725700	1876900	1773200	1638900	1.04011	1.0307	0.966625	1.05132	0.993232
P26639	Threonine--tRNA ligase 1, cytoplasmic OS=Homo sapiens OX=9606 GN=TARS1 PE=1 SV=3	TARS1	83.434	58	183	35	32	35	30	32	30	31	32	28	35	33	32	33	34	33	32	30	29	30	31	30	35	33	32	33	34	33	301320	247770	251170	266530	255610	241560	1349600	1067700	1170400	1309200	1062700	1147100	1.13943	0.901431	0.988138	1.10532	0.89721
P26640	Valine--tRNA ligase OS=Homo sapiens OX=9606 GN=VARS1 PE=1 SV=4	VARS1	140.47	44.4	260	43	43	43	46	41	42	46	43	42	41	38	38	38	37	38	41	38	38	38	37	38	41	38	38	38	37	38	258130	204870	192410	252550	199260	201930	1036400	862250	898570	1058700	845340	898680	1.11044	0.923849	0.962764	1.13433	0.905731
P26641	Elongation factor 1-gamma OS=Homo sapiens OX=9606 GN=EEF1G PE=1 SV=3	EEF1G	50.118	66.1	201	24	24	24	34	33	32	31	34	37	23	21	22	23	23	23	23	21	22	23	23	23	23	21	22	23	23	23	1452000	1403400	1477200	1430400	1344200	1399400	4050000	3800200	4150100	4013800	3632500	3812800	1.03583	0.971943	1.06143	1.02657	0.929052
P26885	Peptidyl-prolyl cis-trans isomerase FKBP2 OS=Homo sapiens OX=9606 GN=FKBP2 PE=1 SV=2	FKBP2	15.649	38	22	5	5	5	3	4	3	4	5	3	4	4	5	5	5	5	4	4	5	5	5	5	4	4	5	5	5	5	43954	45329	71234	58661	58839	90730	255560	253050	219780	241890	242960	208900	1.07821	1.06762	0.92725	1.02053	1.02505
P27105	Stomatin OS=Homo sapiens OX=9606 GN=STOM PE=1 SV=3	STOM	31.73	52.8	73	11	11	11	10	11	13	13	14	12	11	11	11	11	11	11	11	11	11	11	11	11	11	11	11	11	11	11	189710	428540	349180	326960	422340	316490	620820	1080500	897650	891480	1105100	907920	0.676831	1.17798	0.978637	0.97191	1.2048
P27144	Adenylate kinase 4, mitochondrial OS=Homo sapiens OX=9606 GN=AK4 PE=1 SV=1	AK4	25.268	57.4	55	10	10	10	10	8	8	9	11	9	10	9	9	8	10	10	10	9	9	8	10	10	10	9	9	8	10	10	67067	81233	66099	67506	93522	83312	217140	250170	220520	238450	272590	272400	0.885521	1.02022	0.899305	0.972425	1.11165
P27348	14-3-3 protein theta OS=Homo sapiens OX=9606 GN=YWHAQ PE=1 SV=1	YWHAQ	27.764	60	91	14	11	11	17	15	13	18	16	12	14	12	13	14	12	12	11	9	10	11	9	9	11	9	10	11	9	9	1528200	1522800	1492900	1515300	1420600	1298200	5987800	5706300	5951800	6053700	5261600	5580800	1.04009	0.991193	1.03384	1.05154	0.913948
P27361	Mitogen-activated protein kinase 3 OS=Homo sapiens OX=9606 GN=MAPK3 PE=1 SV=4	MAPK3	43.135	42.7	41	12	8	8	7	6	8	7	6	7	12	11	11	10	11	11	8	7	7	6	7	7	8	7	7	6	7	7	44030	36153	37156	37029	38776	36528	211130	190240	172530	226070	177200	172140	1.10221	0.993152	0.900697	1.1802	0.925077
P27448	MAP/microtubule affinity-regulating kinase 3 OS=Homo sapiens OX=9606 GN=MARK3 PE=1 SV=5	MARK3	84.428	30.9	58	17	13	13	10	10	9	9	9	11	15	16	16	16	16	16	11	12	12	12	12	12	11	12	12	12	12	12	10357	10387	11699	11415	11230	11160	60350	57927	60654	60577	54772	60457	1.02076	0.979774	1.0259	1.0246	0.92641
P27449	V-type proton ATPase 16 kDa proteolipid subunit OS=Homo sapiens OX=9606 GN=ATP6V0C PE=1 SV=1	ATP6V0C	15.736	11.6	6	1	1	1	1	1	1	1	1	1	1	1	1	1	1	1	1	1	1	1	1	1	1	1	1	1	1	1	28434	35984	31771	26290	32761	19939	0	0	0	0	0	0
P27469	G0/G1 switch protein 2 OS=Homo sapiens OX=9606 GN=G0S2 PE=1 SV=1	G0S2	11.321	11.7	1	1	1	1	1	0	0	0	0	0	1	1	1	1	0	0	1	1	1	1	0	0	1	1	1	1	0	0	5948.7	557.1	759.32	1865.5			0	0	0	0	0	0
P27482	Calmodulin-like protein 3 OS=Homo sapiens OX=9606 GN=CALML3 PE=1 SV=2	CALML3	16.891	23.5	6	3	1	1	0	1	1	1	1	2	2	3	2	2	2	2	1	1	1	1	1	1	1	1	1	1	1	1	9810.8	13370	11146	9607.8	16475	14028	102950	122350	108270	90226	164690	150790
P27487	Dipeptidyl peptidase 4 OS=Homo sapiens OX=9606 GN=DPP4 PE=1 SV=2	DPP4	88.278	14.2	19	8	8	8	3	4	1	1	4	6	4	8	6	3	6	7	4	8	6	3	6	7	4	8	6	3	6	7	4628.6	9103.3	5766.7	7139.8	7458.8	5920.8	72811	128410	92432	131580	123400	103250	0.67016	1.1819	0.850754	1.21108	1.13579
P27540	Aryl hydrocarbon receptor nuclear translocator OS=Homo sapiens OX=9606 GN=ARNT PE=1 SV=1	ARNT	86.636	3.9	2	2	2	2	0	0	0	0	0	2	1	0	1	0	2	2	1	0	1	0	2	2	1	0	1	0	2	2	94.74		310.92		621.47	735.83	0	0	0	0	13270	17190					0.871307
P27635	60S ribosomal protein L10 OS=Homo sapiens OX=9606 GN=RPL10 PE=1 SV=4	RPL10	24.604	45.3	59	8	8	8	9	9	9	11	9	12	7	8	8	8	8	8	7	8	8	8	8	8	7	8	8	8	8	8	777890	890330	929190	897350	939190	912600	1515000	1438000	1589300	1577400	1534400	1620000	0.980149	0.930333	1.02822	1.02052	0.9927
P27694	Replication protein A 70 kDa DNA-binding subunit OS=Homo sapiens OX=9606 GN=RPA1 PE=1 SV=2	RPA1	68.137	41.1	94	21	21	21	15	17	15	14	17	16	15	17	16	14	18	18	15	17	16	14	18	18	15	17	16	14	18	18	54817	69326	60402	57987	68387	71016	218250	269930	250940	245070	275060	274190	0.853962	1.05617	0.981871	0.958903	1.07625
P27695	DNA-(apurinic or apyrimidinic site) endonuclease OS=Homo sapiens OX=9606 GN=APEX1 PE=1 SV=2	APEX1	35.554	58.5	99	14	14	14	18	18	14	17	17	15	14	12	12	14	12	12	14	12	12	14	12	12	14	12	12	14	12	12	621500	544820	559060	645230	570910	528710	1491900	1233500	1329500	1526900	1236800	1331000	1.09838	0.908143	0.978821	1.12415	0.910572
P27701	CD82 antigen OS=Homo sapiens OX=9606 GN=CD82 PE=1 SV=1	CD82	29.625	11.2	14	3	3	3	1	4	2	2	4	1	2	3	3	3	3	3	2	3	3	3	3	3	2	3	3	3	3	3	10660	24426	14986	10621	24663	16357	75951	175140	104620	67751	176430	112380	0.639792	1.47534	0.881293	0.570717	1.4862
P27707	Deoxycytidine kinase OS=Homo sapiens OX=9606 GN=DCK PE=1 SV=1	DCK	30.518	16.2	14	4	4	4	2	2	4	2	2	2	3	4	4	3	3	4	3	4	4	3	3	4	3	4	4	3	3	4	6882.6	10595	11661	8111.1	9425	11213	55799	63711	83202	61101	75268	75756	0.80705	0.921485	1.20339	0.883735	1.08864
P27708	CAD protein OS=Homo sapiens OX=9606 GN=CAD PE=1 SV=3	CAD	242.98	48.6	440	71	71	71	70	73	77	77	69	74	61	64	66	63	65	65	61	64	66	63	65	65	61	64	66	63	65	65	145720	147980	151600	144320	136870	138600	959900	910910	956580	917890	856120	893030	1.04822	0.994727	1.0446	1.00235	0.934896
P27797	Calreticulin OS=Homo sapiens OX=9606 GN=CALR PE=1 SV=1	CALR	48.141	60.2	196	21	21	21	30	35	33	31	32	35	20	21	20	19	21	19	20	21	20	19	21	19	20	21	20	19	21	19	1904000	1925000	1855800	1931300	2081200	2155300	6219300	5793000	5955000	6604300	6605700	6993400	0.977603	0.910594	0.936058	1.03812	1.03834
P27816	Microtubule-associated protein 4 OS=Homo sapiens OX=9606 GN=MAP4 PE=1 SV=3	MAP4	121	41.5	179	35	35	35	31	28	28	32	30	30	29	31	32	33	31	30	29	31	32	33	31	30	29	31	32	33	31	30	150270	139700	144250	160690	154940	150680	999170	912570	974710	999960	944620	988490	1.03016	0.940871	1.00494	1.03097	0.973915
P27824	Calnexin OS=Homo sapiens OX=9606 GN=CANX PE=1 SV=2	CANX	67.567	35.8	110	19	19	19	18	16	21	20	17	18	18	17	17	19	18	17	18	17	17	19	18	17	18	17	17	19	18	17	627080	540340	574680	621570	579720	539580	3064000	2741300	2861700	3067900	2692400	2722700	1.07195	0.959055	1.00118	1.07332	0.941948
P28062	Proteasome subunit beta type-8 OS=Homo sapiens OX=9606 GN=PSMB8 PE=1 SV=3	PSMB8	30.354	28.6	45	7	7	7	8	6	7	8	9	7	6	5	7	6	6	7	6	5	7	6	6	7	6	5	7	6	6	7	51980	59297	64422	63843	78833	67834	271080	335050	269680	290380	406400	312650	0.862744	1.06634	0.858289	0.924169	1.29342
P28065	Proteasome subunit beta type-9 OS=Homo sapiens OX=9606 GN=PSMB9 PE=1 SV=2	PSMB9	23.264	26	25	5	5	5	3	5	5	4	4	4	4	5	5	5	5	4	4	5	5	5	5	4	4	5	5	5	5	4	24420	34465	27164	24686	41218	30826	63651	105030	78902	61842	130730	101860	0.704604	1.16266	0.87343	0.684579	1.44716
P28066	Proteasome subunit alpha type-5 OS=Homo sapiens OX=9606 GN=PSMA5 PE=1 SV=3	PSMA5	26.411	57.7	68	10	10	10	12	14	10	11	11	10	10	10	10	10	10	9	10	10	10	10	10	9	10	10	10	10	10	9	424470	466660	412780	459040	485870	381390	831500	805910	807900	820470	847990	822800	1.01062	0.979518	0.981937	0.997215	1.03066
P28070	Proteasome subunit beta type-4 OS=Homo sapiens OX=9606 GN=PSMB4 PE=1 SV=4	PSMB4	29.204	45.8	28	8	8	8	5	5	4	5	5	4	7	7	7	6	6	5	7	7	7	6	6	5	7	7	7	6	6	5	136690	206590	179490	175350	195920	163380	497060	570510	547660	520580	549970	610920	0.90465	1.03833	0.996742	0.947457	1.00095
P28072	Proteasome subunit beta type-6 OS=Homo sapiens OX=9606 GN=PSMB6 PE=1 SV=4	PSMB6	25.357	29.3	19	4	4	4	2	3	4	4	3	3	4	4	4	4	4	4	4	4	4	4	4	4	4	4	4	4	4	4	61001	55619	61946	61332	48589	60768	194110	171220	205600	203730	155480	210890	1.02071	0.900344	1.08113	1.0713	0.817577
P28074	Proteasome subunit beta type-5 OS=Homo sapiens OX=9606 GN=PSMB5 PE=1 SV=3	PSMB5	28.48	46.8	63	10	10	10	11	11	10	10	11	10	10	10	10	10	10	9	10	10	10	10	10	9	10	10	10	10	10	9	156620	150810	154680	156370	138460	146410	545490	495360	541030	550550	438120	577100	1.0398	0.944247	1.0313	1.04945	0.835137
P28161	Glutathione S-transferase Mu 2 OS=Homo sapiens OX=9606 GN=GSTM2 PE=1 SV=2	GSTM2	25.744	28	9	5	4	4	2	1	1	2	0	3	4	4	3	5	4	4	3	3	2	4	3	3	3	3	2	4	3	3	5986	7184.8	2964.2	9475.1	7105.8	6748.4	60502	62109	61692	77046	63141	65247	0.931428	0.956168	0.949748	1.18612	0.972056
P28288	ATP-binding cassette sub-family D member 3 OS=Homo sapiens OX=9606 GN=ABCD3 PE=1 SV=1	ABCD3	75.475	19.6	44	10	10	10	6	6	6	10	8	8	9	7	6	9	8	8	9	7	6	9	8	8	9	7	6	9	8	8	14367	12640	10404	14799	13742	11451	136940	126180	119790	154800	128840	124570	1.03858	0.956972	0.908509	1.17403	0.977146
P28290	Protein ITPRID2 OS=Homo sapiens OX=9606 GN=ITPRID2 PE=1 SV=3	ITPRID2	138.38	8.3	25	7	7	7	5	4	4	4	4	4	5	6	6	6	7	7	5	6	6	6	7	7	5	6	6	6	7	7	1284.9	1926.9	1673.1	1491.5	1485.5	1807.5	29112	26467	28614	30965	22962	31311	1.03093	0.937266	1.0133	1.09655	0.813145
P28300	Protein-lysine 6-oxidase OS=Homo sapiens OX=9606 GN=LOX PE=1 SV=2	LOX	46.944	19.2	12	5	5	5	1	0	0	1	4	6	2	4	3	2	5	5	2	4	3	2	5	5	2	4	3	2	5	5	4433.1	4324.1	4174.6	4544.5	8896.3	12104	48286	24157	29805	49135	94380	97919	0.842977	0.421733	0.520336	0.857799	1.64769
P28331	NADH-ubiquinone oxidoreductase 75 kDa subunit, mitochondrial OS=Homo sapiens OX=9606 GN=NDUFS1 PE=1 SV=3	NDUFS1	79.467	52.3	137	26	26	26	24	24	25	23	21	20	24	23	23	23	24	23	24	23	23	23	24	23	24	23	23	23	24	23	88977	79926	75445	81243	78556	73860	434030	360300	370920	388000	361280	374720	1.13757	0.944327	0.972161	1.01693	0.946895
P28340	DNA polymerase delta catalytic subunit OS=Homo sapiens OX=9606 GN=POLD1 PE=1 SV=2	POLD1	123.63	34.5	115	27	27	27	14	22	21	17	23	18	19	25	25	19	25	19	19	25	25	19	25	19	19	25	25	19	25	19	10499	15951	13889	11338	16875	13048	132960	166860	158150	134350	177300	181150	0.839067	1.053	0.998033	0.847839	1.11888
P28347	Transcriptional enhancer factor TEF-1 OS=Homo sapiens OX=9606 GN=TEAD1 PE=1 SV=2	TEAD1	47.945	9.6	8	2	2	2	1	2	1	1	2	1	1	2	1	1	2	1	1	2	1	1	2	1	1	2	1	1	2	1	1297.8	1434.9	1082.5	1766.1	8877.8	1316.3	0	20817	0	0	105430	0		0.329782			1.67022
P28370	Probable global transcription activator SNF2L1 OS=Homo sapiens OX=9606 GN=SMARCA1 PE=1 SV=2	SMARCA1	122.6	17.6	29	17	9	9	4	5	5	5	5	5	10	15	11	11	13	14	7	8	5	6	6	8	7	8	5	6	6	8	6926.3	7673.9	3699.1	5163.2	3778	7149.2	114750	128440	128020	100590	109710	115790	0.98738	1.10518	1.10156	0.865539	0.944013
P28482	Mitogen-activated protein kinase 1 OS=Homo sapiens OX=9606 GN=MAPK1 PE=1 SV=3	MAPK1	41.389	67.8	93	18	14	18	19	16	15	15	16	12	16	17	17	18	16	14	12	13	13	14	12	10	16	17	17	18	16	14	227980	225390	214410	237070	218250	189530	750310	731870	721460	760230	719040	714200	1.02382	0.99866	0.984456	1.03736	0.981154
P28676	Grancalcin OS=Homo sapiens OX=9606 GN=GCA PE=1 SV=2	GCA	24.01	32.3	21	6	6	6	3	2	4	4	3	5	4	5	5	6	6	6	4	5	5	6	6	6	4	5	5	6	6	6	45145	44918	45200	62262	50130	48264	162020	143950	149430	192680	144640	145960	1.03562	0.920122	0.95515	1.2316	0.924532
P28702	Retinoic acid receptor RXR-beta OS=Homo sapiens OX=9606 GN=RXRB PE=1 SV=2	RXRB	56.921	5.1	5	2	1	1	1	0	1	1	1	1	2	1	1	2	2	1	1	0	1	1	1	1	1	0	1	1	1	1	378.26		250.79	284.72	204.72	153.41	0	0	0	0	0	0
P28715	DNA excision repair protein ERCC-5 OS=Homo sapiens OX=9606 GN=ERCC5 PE=1 SV=3	ERCC5	133.11	2.6	6	2	2	2	1	1	0	1	1	2	1	1	0	1	1	2	1	1	0	1	1	2	1	1	0	1	1	2	265.62	218.37		240.54	218.91	383.4	0	0	0	0	0	0
P28799	Progranulin OS=Homo sapiens OX=9606 GN=GRN PE=1 SV=2	GRN	63.544	31	49	10	10	10	8	10	9	7	6	9	10	9	9	8	8	9	10	9	9	8	8	9	10	9	9	8	8	9	34464	22805	19434	17156	19995	23123	161470	131180	135190	116730	143760	162790	1.13829	0.924758	0.953027	0.822892	1.01344
P28838	Cytosol aminopeptidase OS=Homo sapiens OX=9606 GN=LAP3 PE=1 SV=3	LAP3	56.166	58.4	176	24	24	24	25	34	30	28	32	27	22	24	24	22	23	21	22	24	24	22	23	21	22	24	24	22	23	21	238740	473450	322300	304370	534150	371280	561140	973440	714220	678870	1120600	857130	0.686354	1.19066	0.873592	0.830354	1.37065
P29034	Protein S100-A2 OS=Homo sapiens OX=9606 GN=S100A2 PE=1 SV=3	S100A2	11.117	19.4	10	2	2	2	2	2	1	2	2	1	2	2	1	2	2	1	2	2	1	2	2	1	2	2	1	2	2	1	79355	399000	89640	121830	460790	110710	162110	921130	0	275220	1066800	0	0.267369	1.51923		0.453922	1.75948
P29083	General transcription factor IIE subunit 1 OS=Homo sapiens OX=9606 GN=GTF2E1 PE=1 SV=2	GTF2E1	49.452	15.7	26	5	5	5	3	4	5	5	5	4	4	5	4	5	5	4	4	5	4	5	5	4	4	5	4	5	5	4	9700.5	11039	9112.2	10062	11419	8411.5	115420	91863	98133	96426	98509	98628	1.15617	0.920196	0.983003	0.965904	0.986769
P29084	Transcription initiation factor IIE subunit beta OS=Homo sapiens OX=9606 GN=GTF2E2 PE=1 SV=1	GTF2E2	33.043	37.5	37	7	7	7	5	7	7	5	6	7	6	7	7	6	7	7	6	7	7	6	7	7	6	7	7	6	7	7	14794	14983	14291	13287	15656	13011	87037	77186	78737	80620	81491	77827	1.08143	0.959035	0.978306	1.0017	1.01252
P29144	Tripeptidyl-peptidase 2 OS=Homo sapiens OX=9606 GN=TPP2 PE=1 SV=4	TPP2	138.35	32.1	108	28	28	28	19	17	19	16	18	19	23	23	23	24	24	25	23	23	23	24	24	25	23	23	23	24	24	25	40651	32363	32723	39970	35545	35818	642290	543540	586270	626110	562650	618730	1.07659	0.911065	0.982688	1.04947	0.943097
P29218	Inositol monophosphatase 1 OS=Homo sapiens OX=9606 GN=IMPA1 PE=1 SV=1	IMPA1	30.188	40.4	38	9	9	9	8	7	6	6	5	6	8	8	8	7	8	8	8	8	8	7	8	8	8	8	8	7	8	8	42511	38727	37617	39000	43478	40687	155800	134540	138130	144550	134800	127900	1.11856	0.965922	0.991696	1.03779	0.967788
P29317	Ephrin type-A receptor 2 OS=Homo sapiens OX=9606 GN=EPHA2 PE=1 SV=2	EPHA2	108.27	25.6	58	17	15	17	11	10	14	5	7	11	15	15	15	10	14	14	13	13	13	8	12	12	15	15	15	10	14	14	24329	24634	25023	8150.3	22124	17482	160390	173090	179430	75437	158220	138110	1.08779	1.17392	1.21692	0.511624	1.07307
P29323	Ephrin type-B receptor 2 OS=Homo sapiens OX=9606 GN=EPHB2 PE=1 SV=5	EPHB2	117.49	17.4	56	13	11	11	10	10	8	10	9	9	12	12	12	11	12	13	10	10	10	9	10	11	10	10	10	9	10	11	10711	9189.1	8481.4	9020.7	8495.5	8408.1	103990	92426	92104	93334	85876	83639	1.13162	1.00578	1.00228	1.01566	0.934503
P29350	Tyrosine-protein phosphatase non-receptor type 6 OS=Homo sapiens OX=9606 GN=PTPN6 PE=1 SV=1	PTPN6	67.56	14.1	25	6	6	6	4	5	4	5	3	4	4	6	6	5	5	5	4	6	6	5	5	5	4	6	6	5	5	5	6689.8	7135.4	5759.1	7870.2	6002.3	3791.2	79788	80660	67176	92150	71504	63781	1.05201	1.06351	0.885723	1.21501	0.942788
P29353	SHC-transforming protein 1 OS=Homo sapiens OX=9606 GN=SHC1 PE=1 SV=4	SHC1	62.821	18.9	34	7	7	7	6	4	6	6	6	6	6	7	7	7	7	7	6	7	7	7	7	7	6	7	7	7	7	7	45540	42597	45585	50498	49385	46536	969530	781850	890700	1014800	849560	877000	1.08057	0.871394	0.992711	1.13102	0.946859
P29372	DNA-3-methyladenine glycosylase OS=Homo sapiens OX=9606 GN=MPG PE=1 SV=3	MPG	32.868	10.1	7	2	2	2	1	1	2	1	1	1	2	2	2	2	2	1	2	2	2	2	2	1	2	2	2	2	2	1	3915.1	5406.8	6228.8	4778.2	6203.8	3908.7	42259	48868	68828	47633	51863	0	0.814393	0.941758	1.32642	0.917958	0.999476
P29373	Cellular retinoic acid-binding protein 2 OS=Homo sapiens OX=9606 GN=CRABP2 PE=1 SV=2	CRABP2	15.693	57.2	51	8	8	8	9	8	9	9	9	7	8	8	7	8	8	7	8	8	7	8	8	7	8	8	7	8	8	7	361640	331380	306170	362300	339490	298000	658850	577970	562700	657260	572390	555510	1.10278	0.9674	0.941841	1.10011	0.95806
P29401	Transketolase OS=Homo sapiens OX=9606 GN=TKT PE=1 SV=3	TKT	67.877	66.9	274	28	28	28	43	46	50	49	45	41	26	28	28	27	28	27	26	28	28	27	28	27	26	28	28	27	28	27	1754800	1984500	1695700	2285700	1907700	1652400	6318500	6655000	6214200	8489400	6574300	6400800	0.932569	0.982235	0.917175	1.25298	0.970324
P29466	Caspase-1 OS=Homo sapiens OX=9606 GN=CASP1 PE=1 SV=1	CASP1	45.158	7.4	4	2	2	2	0	2	0	0	1	1	0	2	1	0	2	1	0	2	1	0	2	1	0	2	1	0	2	1		1601.6	207.58		1862.6	691.91	0	16791	0	0	19635	0		0.921924			1.07808
[truncated: 4,819 more rows]
[truncated: 3 more columns]
